# Supplementary material for: Desert dunes transformed by end-of-century changes in wind climate
Source: Research Square preprint supplement (doi:10.21203/rs.3.rs-1537759/v1), 2022-04-13
Supplement: Supplementary file 1 [file 5516baa84cd08dcf750e9d30.zip]

### Supplementary Information Description

We provide the maps of [Figure 2](#) as .kml layers that can be opened in Google Earth (Pro), together with additional layers for aiding use and interpretation. We also provide a .kml layer with the arid zone desert dune inventory. All files need to be placed together in the same folder for opening in Google Earth (the .kml layers require access to the .png images). Google Earth layers were created using the Google Earth Toolbox for Matlab<sup>S1</sup>.

| Filename                   | Description                                                                                                                                                                                                                                                                     |
|----------------------------|---------------------------------------------------------------------------------------------------------------------------------------------------------------------------------------------------------------------------------------------------------------------------------|
| GE_HadGEM3_gridLines.kml   | A projection of the N216 grid lines over the globe, defining the HadGEM3 grid cells used in all analysis                                                                                                                                                                        |
| GE_HadGEM3_gridCell_ID.kml | Indicates the row and column numbers of the grid cell in its NW corner                                                                                                                                                                                                          |
| GE_DP_changeMap.kml        | Map of predicted changes in DP, colour ranges identical to Figure 2a                                                                                                                                                                                                            |
| GE_DPdiff.png              | Image used in [GE_DP_changeMap.kml]                                                                                                                                                                                                                                             |
| GE_DP_info.kml             | Indicates DP values as “DP: Current-Value $\pm$ Future-Change ( $\pm\%$ )”, for each arid zone grid cell                                                                                                                                                                        |
| GE_RDP_changeMap.kml       | Map of predicted changes in RDP, colour ranges identical to Figure 2b                                                                                                                                                                                                           |
| GE_RDPdiff.png             | Image used in [GE_RDP_changeMap.kml]                                                                                                                                                                                                                                            |
| GE_RDP_info.kml            | Indicates RDP values as “RDP: Current-Value $\pm$ Future-Change ( $\pm\%$ )”, for each arid zone grid cell                                                                                                                                                                      |
| GE_Ratio_changeMap.kml     | Map of predicted changes in RDP/DP, colour ranges identical to Figure 2c                                                                                                                                                                                                        |
| GE_Ratiodiff.png           | Image used in [GE_Ratio_changeMap.kml]                                                                                                                                                                                                                                          |
| GE_Ratio_info.kml          | Indicates RDP/DP values as “Ratio: Current-Value $\pm$ Future-Change”, for each arid zone grid cell                                                                                                                                                                             |
| GE_RDDir_changeMap.kml     | Map of predicted changes in RDDir, colour ranges identical to Figure 2d                                                                                                                                                                                                         |
| GE_RDDirdiff.png           | Image used in [GE_RDDir_changeMap.kml]                                                                                                                                                                                                                                          |
| GE_RDDir_info.kml          | Indicates RDDir values as “RDDir: Current-Value $\pm$ Future-Change” in geographical compass degrees, for each arid zone grid cell                                                                                                                                              |
| GE_DesertDunes.kml         | Indicates presence of four main types of desert dunes: Barchan (B), Transverse-crescentic (T), Linear-seif (L), and Star (S) dunes, and their estimated extent: localised pockets (<10%), sparse (~30%), partial (~50%), and full (>80%) coverage, for each arid zone grid cell |

S1. Scott lee Davis (2022). Google Earth Toolbox

(<https://www.mathworks.com/matlabcentral/fileexchange/12954-google-earth-toolbox>), MATLAB Central File Exchange.
