# Supplementary material for: Desert dunes transformed by end-of-century changes in wind climate
Source: Research Square preprint supplement (doi:10.21203/rs.3.rs-1537759/v1), 2022-04-13
Supplement: Supplementary file 2 [file 5516baa84cd08dcf750e9d30.zip]

Archive with 6 entries (6 files):
- GE_DesertDunes.kml
- GE_DPdiff.png
- GE_Ratiodiff.png
- GE_RDDirdiff.png
- GE_RDPdiff.png
- Supplementary Information Description v2.pdf
