# Supplementary material for: Desert dunes transformed by end-of-century changes in wind climate
Source: Research Square preprint supplement (doi:10.21203/rs.3.rs-1537759/v1), 2022-04-13
Supplement: Supplementary file 2 [file 5516baa84cd08dcf750e9d30.zip › GE_DesertDunes.kml]

<?xml version="1.0" encoding="UTF-8"?>
<kml xmlns="http://earth.google.com/kml/2.1">
<Document>
<name>
GE_DesertDunes.kml
</name>
<Style id="icon">
<IconStyle>
<scale>0</scale>
</IconStyle>
</Style>
<Placemark>
<name>
            </name>
<styleUrl>#icon</styleUrl>
<Point>
<coordinates>
-164.5,-83.9889
</coordinates>
</Point>
</Placemark>
<Placemark>
<name>
            </name>
<styleUrl>#icon</styleUrl>
<Point>
<coordinates>
-163.6667,-83.9889
</coordinates>
</Point>
</Placemark>
<Placemark>
<name>
            </name>
<styleUrl>#icon</styleUrl>
<Point>
<coordinates>
-144.5,67.6778
</coordinates>
</Point>
</Placemark>
<Placemark>
<name>
            </name>
<styleUrl>#icon</styleUrl>
<Point>
<coordinates>
-122,52.1222
</coordinates>
</Point>
</Placemark>
<Placemark>
<name>
            </name>
<styleUrl>#icon</styleUrl>
<Point>
<coordinates>
-121.1667,44.9
</coordinates>
</Point>
</Placemark>
<Placemark>
<name>
            </name>
<styleUrl>#icon</styleUrl>
<Point>
<coordinates>
-121.1667,44.3444
</coordinates>
</Point>
</Placemark>
<Placemark>
<name>
            </name>
<styleUrl>#icon</styleUrl>
<Point>
<coordinates>
-121.1667,43.2333
</coordinates>
</Point>
</Placemark>
<Placemark>
<name>
            </name>
<styleUrl>#icon</styleUrl>
<Point>
<coordinates>
-121.1667,42.6778
</coordinates>
</Point>
</Placemark>
<Placemark>
<name>
            </name>
<styleUrl>#icon</styleUrl>
<Point>
<coordinates>
-121.1667,42.1222
</coordinates>
</Point>
</Placemark>
<Placemark>
<name>
            </name>
<styleUrl>#icon</styleUrl>
<Point>
<coordinates>
-120.3333,51.0111
</coordinates>
</Point>
</Placemark>
<Placemark>
<name>
            </name>
<styleUrl>#icon</styleUrl>
<Point>
<coordinates>
-120.3333,50.4556
</coordinates>
</Point>
</Placemark>
<Placemark>
<name>
            </name>
<styleUrl>#icon</styleUrl>
<Point>
<coordinates>
-120.3333,47.6778
</coordinates>
</Point>
</Placemark>
<Placemark>
<name>
            </name>
<styleUrl>#icon</styleUrl>
<Point>
<coordinates>
-120.3333,47.1222
</coordinates>
</Point>
</Placemark>
<Placemark>
<name>
            </name>
<styleUrl>#icon</styleUrl>
<Point>
<coordinates>
-120.3333,46.5667
</coordinates>
</Point>
</Placemark>
<Placemark>
<name>
            </name>
<styleUrl>#icon</styleUrl>
<Point>
<coordinates>
-120.3333,46.0111
</coordinates>
</Point>
</Placemark>
<Placemark>
<name>
            </name>
<styleUrl>#icon</styleUrl>
<Point>
<coordinates>
-120.3333,45.4556
</coordinates>
</Point>
</Placemark>
<Placemark>
<name>
            </name>
<styleUrl>#icon</styleUrl>
<Point>
<coordinates>
-120.3333,44.9
</coordinates>
</Point>
</Placemark>
<Placemark>
<name>
            </name>
<styleUrl>#icon</styleUrl>
<Point>
<coordinates>
-120.3333,44.3444
</coordinates>
</Point>
</Placemark>
<Placemark>
<name>
B (local)    T (local)        </name>
<styleUrl>#icon</styleUrl>
<Point>
<coordinates>
-120.3333,43.7889
</coordinates>
</Point>
</Placemark>
<Placemark>
<name>
B (local)    T (local)        </name>
<styleUrl>#icon</styleUrl>
<Point>
<coordinates>
-120.3333,43.2333
</coordinates>
</Point>
</Placemark>
<Placemark>
<name>
            </name>
<styleUrl>#icon</styleUrl>
<Point>
<coordinates>
-120.3333,42.6778
</coordinates>
</Point>
</Placemark>
<Placemark>
<name>
            </name>
<styleUrl>#icon</styleUrl>
<Point>
<coordinates>
-120.3333,42.1222
</coordinates>
</Point>
</Placemark>
<Placemark>
<name>
            </name>
<styleUrl>#icon</styleUrl>
<Point>
<coordinates>
-120.3333,41.5667
</coordinates>
</Point>
</Placemark>
<Placemark>
<name>
            </name>
<styleUrl>#icon</styleUrl>
<Point>
<coordinates>
-120.3333,41.0111
</coordinates>
</Point>
</Placemark>
<Placemark>
<name>
            </name>
<styleUrl>#icon</styleUrl>
<Point>
<coordinates>
-120.3333,37.1222
</coordinates>
</Point>
</Placemark>
<Placemark>
<name>
            </name>
<styleUrl>#icon</styleUrl>
<Point>
<coordinates>
-120.3333,36.5667
</coordinates>
</Point>
</Placemark>
<Placemark>
<name>
            </name>
<styleUrl>#icon</styleUrl>
<Point>
<coordinates>
-120.3333,36.0111
</coordinates>
</Point>
</Placemark>
<Placemark>
<name>
            </name>
<styleUrl>#icon</styleUrl>
<Point>
<coordinates>
-119.5,49.9
</coordinates>
</Point>
</Placemark>
<Placemark>
<name>
            </name>
<styleUrl>#icon</styleUrl>
<Point>
<coordinates>
-119.5,49.3444
</coordinates>
</Point>
</Placemark>
<Placemark>
<name>
            </name>
<styleUrl>#icon</styleUrl>
<Point>
<coordinates>
-119.5,48.7889
</coordinates>
</Point>
</Placemark>
<Placemark>
<name>
            </name>
<styleUrl>#icon</styleUrl>
<Point>
<coordinates>
-119.5,48.2333
</coordinates>
</Point>
</Placemark>
<Placemark>
<name>
            </name>
<styleUrl>#icon</styleUrl>
<Point>
<coordinates>
-119.5,47.6778
</coordinates>
</Point>
</Placemark>
<Placemark>
<name>
            </name>
<styleUrl>#icon</styleUrl>
<Point>
<coordinates>
-119.5,47.1222
</coordinates>
</Point>
</Placemark>
<Placemark>
<name>
            </name>
<styleUrl>#icon</styleUrl>
<Point>
<coordinates>
-119.5,46.5667
</coordinates>
</Point>
</Placemark>
<Placemark>
<name>
            </name>
<styleUrl>#icon</styleUrl>
<Point>
<coordinates>
-119.5,46.0111
</coordinates>
</Point>
</Placemark>
<Placemark>
<name>
            </name>
<styleUrl>#icon</styleUrl>
<Point>
<coordinates>
-119.5,45.4556
</coordinates>
</Point>
</Placemark>
<Placemark>
<name>
            </name>
<styleUrl>#icon</styleUrl>
<Point>
<coordinates>
-119.5,44.9
</coordinates>
</Point>
</Placemark>
<Placemark>
<name>
            </name>
<styleUrl>#icon</styleUrl>
<Point>
<coordinates>
-119.5,44.3444
</coordinates>
</Point>
</Placemark>
<Placemark>
<name>
            </name>
<styleUrl>#icon</styleUrl>
<Point>
<coordinates>
-119.5,43.7889
</coordinates>
</Point>
</Placemark>
<Placemark>
<name>
            </name>
<styleUrl>#icon</styleUrl>
<Point>
<coordinates>
-119.5,43.2333
</coordinates>
</Point>
</Placemark>
<Placemark>
<name>
            </name>
<styleUrl>#icon</styleUrl>
<Point>
<coordinates>
-119.5,42.6778
</coordinates>
</Point>
</Placemark>
<Placemark>
<name>
            </name>
<styleUrl>#icon</styleUrl>
<Point>
<coordinates>
-119.5,42.1222
</coordinates>
</Point>
</Placemark>
<Placemark>
<name>
            </name>
<styleUrl>#icon</styleUrl>
<Point>
<coordinates>
-119.5,41.5667
</coordinates>
</Point>
</Placemark>
<Placemark>
<name>
            </name>
<styleUrl>#icon</styleUrl>
<Point>
<coordinates>
-119.5,41.0111
</coordinates>
</Point>
</Placemark>
<Placemark>
<name>
            </name>
<styleUrl>#icon</styleUrl>
<Point>
<coordinates>
-119.5,40.4556
</coordinates>
</Point>
</Placemark>
<Placemark>
<name>
            </name>
<styleUrl>#icon</styleUrl>
<Point>
<coordinates>
-119.5,39.9
</coordinates>
</Point>
</Placemark>
<Placemark>
<name>
            </name>
<styleUrl>#icon</styleUrl>
<Point>
<coordinates>
-119.5,37.1222
</coordinates>
</Point>
</Placemark>
<Placemark>
<name>
            </name>
<styleUrl>#icon</styleUrl>
<Point>
<coordinates>
-119.5,36.5667
</coordinates>
</Point>
</Placemark>
<Placemark>
<name>
            </name>
<styleUrl>#icon</styleUrl>
<Point>
<coordinates>
-119.5,36.0111
</coordinates>
</Point>
</Placemark>
<Placemark>
<name>
            </name>
<styleUrl>#icon</styleUrl>
<Point>
<coordinates>
-119.5,35.4556
</coordinates>
</Point>
</Placemark>
<Placemark>
<name>
            </name>
<styleUrl>#icon</styleUrl>
<Point>
<coordinates>
-118.6667,48.2333
</coordinates>
</Point>
</Placemark>
<Placemark>
<name>
            </name>
<styleUrl>#icon</styleUrl>
<Point>
<coordinates>
-118.6667,47.6778
</coordinates>
</Point>
</Placemark>
<Placemark>
<name>
            </name>
<styleUrl>#icon</styleUrl>
<Point>
<coordinates>
-118.6667,47.1222
</coordinates>
</Point>
</Placemark>
<Placemark>
<name>
            </name>
<styleUrl>#icon</styleUrl>
<Point>
<coordinates>
-118.6667,46.5667
</coordinates>
</Point>
</Placemark>
<Placemark>
<name>
            </name>
<styleUrl>#icon</styleUrl>
<Point>
<coordinates>
-118.6667,46.0111
</coordinates>
</Point>
</Placemark>
<Placemark>
<name>
            </name>
<styleUrl>#icon</styleUrl>
<Point>
<coordinates>
-118.6667,43.7889
</coordinates>
</Point>
</Placemark>
<Placemark>
<name>
            </name>
<styleUrl>#icon</styleUrl>
<Point>
<coordinates>
-118.6667,43.2333
</coordinates>
</Point>
</Placemark>
<Placemark>
<name>
            </name>
<styleUrl>#icon</styleUrl>
<Point>
<coordinates>
-118.6667,42.6778
</coordinates>
</Point>
</Placemark>
<Placemark>
<name>
            </name>
<styleUrl>#icon</styleUrl>
<Point>
<coordinates>
-118.6667,42.1222
</coordinates>
</Point>
</Placemark>
<Placemark>
<name>
            </name>
<styleUrl>#icon</styleUrl>
<Point>
<coordinates>
-118.6667,41.5667
</coordinates>
</Point>
</Placemark>
<Placemark>
<name>
            </name>
<styleUrl>#icon</styleUrl>
<Point>
<coordinates>
-118.6667,41.0111
</coordinates>
</Point>
</Placemark>
<Placemark>
<name>
            </name>
<styleUrl>#icon</styleUrl>
<Point>
<coordinates>
-118.6667,40.4556
</coordinates>
</Point>
</Placemark>
<Placemark>
<name>
            </name>
<styleUrl>#icon</styleUrl>
<Point>
<coordinates>
-118.6667,39.9
</coordinates>
</Point>
</Placemark>
<Placemark>
<name>
            </name>
<styleUrl>#icon</styleUrl>
<Point>
<coordinates>
-118.6667,39.3444
</coordinates>
</Point>
</Placemark>
<Placemark>
<name>
            </name>
<styleUrl>#icon</styleUrl>
<Point>
<coordinates>
-118.6667,38.7889
</coordinates>
</Point>
</Placemark>
<Placemark>
<name>
            </name>
<styleUrl>#icon</styleUrl>
<Point>
<coordinates>
-118.6667,38.2333
</coordinates>
</Point>
</Placemark>
<Placemark>
<name>
            </name>
<styleUrl>#icon</styleUrl>
<Point>
<coordinates>
-118.6667,35.4556
</coordinates>
</Point>
</Placemark>
<Placemark>
<name>
            </name>
<styleUrl>#icon</styleUrl>
<Point>
<coordinates>
-117.8333,47.6778
</coordinates>
</Point>
</Placemark>
<Placemark>
<name>
            </name>
<styleUrl>#icon</styleUrl>
<Point>
<coordinates>
-117.8333,47.1222
</coordinates>
</Point>
</Placemark>
<Placemark>
<name>
            </name>
<styleUrl>#icon</styleUrl>
<Point>
<coordinates>
-117.8333,44.9
</coordinates>
</Point>
</Placemark>
<Placemark>
<name>
            </name>
<styleUrl>#icon</styleUrl>
<Point>
<coordinates>
-117.8333,44.3444
</coordinates>
</Point>
</Placemark>
<Placemark>
<name>
            </name>
<styleUrl>#icon</styleUrl>
<Point>
<coordinates>
-117.8333,43.7889
</coordinates>
</Point>
</Placemark>
<Placemark>
<name>
            </name>
<styleUrl>#icon</styleUrl>
<Point>
<coordinates>
-117.8333,43.2333
</coordinates>
</Point>
</Placemark>
<Placemark>
<name>
            </name>
<styleUrl>#icon</styleUrl>
<Point>
<coordinates>
-117.8333,42.6778
</coordinates>
</Point>
</Placemark>
<Placemark>
<name>
            </name>
<styleUrl>#icon</styleUrl>
<Point>
<coordinates>
-117.8333,42.1222
</coordinates>
</Point>
</Placemark>
<Placemark>
<name>
            </name>
<styleUrl>#icon</styleUrl>
<Point>
<coordinates>
-117.8333,41.5667
</coordinates>
</Point>
</Placemark>
<Placemark>
<name>
            </name>
<styleUrl>#icon</styleUrl>
<Point>
<coordinates>
-117.8333,41.0111
</coordinates>
</Point>
</Placemark>
<Placemark>
<name>
            </name>
<styleUrl>#icon</styleUrl>
<Point>
<coordinates>
-117.8333,40.4556
</coordinates>
</Point>
</Placemark>
<Placemark>
<name>
            </name>
<styleUrl>#icon</styleUrl>
<Point>
<coordinates>
-117.8333,39.9
</coordinates>
</Point>
</Placemark>
<Placemark>
<name>
            </name>
<styleUrl>#icon</styleUrl>
<Point>
<coordinates>
-117.8333,39.3444
</coordinates>
</Point>
</Placemark>
<Placemark>
<name>
            </name>
<styleUrl>#icon</styleUrl>
<Point>
<coordinates>
-117.8333,38.7889
</coordinates>
</Point>
</Placemark>
<Placemark>
<name>
            </name>
<styleUrl>#icon</styleUrl>
<Point>
<coordinates>
-117.8333,38.2333
</coordinates>
</Point>
</Placemark>
<Placemark>
<name>
            </name>
<styleUrl>#icon</styleUrl>
<Point>
<coordinates>
-117.8333,37.6778
</coordinates>
</Point>
</Placemark>
<Placemark>
<name>
    T (local)        S (local)</name>
<styleUrl>#icon</styleUrl>
<Point>
<coordinates>
-117.8333,37.1222
</coordinates>
</Point>
</Placemark>
<Placemark>
<name>
            </name>
<styleUrl>#icon</styleUrl>
<Point>
<coordinates>
-117.8333,36.5667
</coordinates>
</Point>
</Placemark>
<Placemark>
<name>
            </name>
<styleUrl>#icon</styleUrl>
<Point>
<coordinates>
-117.8333,36.0111
</coordinates>
</Point>
</Placemark>
<Placemark>
<name>
            </name>
<styleUrl>#icon</styleUrl>
<Point>
<coordinates>
-117.8333,35.4556
</coordinates>
</Point>
</Placemark>
<Placemark>
<name>
            </name>
<styleUrl>#icon</styleUrl>
<Point>
<coordinates>
-117.8333,34.9
</coordinates>
</Point>
</Placemark>
<Placemark>
<name>
            </name>
<styleUrl>#icon</styleUrl>
<Point>
<coordinates>
-117,46.5667
</coordinates>
</Point>
</Placemark>
<Placemark>
<name>
            </name>
<styleUrl>#icon</styleUrl>
<Point>
<coordinates>
-117,44.9
</coordinates>
</Point>
</Placemark>
<Placemark>
<name>
            </name>
<styleUrl>#icon</styleUrl>
<Point>
<coordinates>
-117,44.3444
</coordinates>
</Point>
</Placemark>
<Placemark>
<name>
            </name>
<styleUrl>#icon</styleUrl>
<Point>
<coordinates>
-117,43.7889
</coordinates>
</Point>
</Placemark>
<Placemark>
<name>
            </name>
<styleUrl>#icon</styleUrl>
<Point>
<coordinates>
-117,43.2333
</coordinates>
</Point>
</Placemark>
<Placemark>
<name>
            </name>
<styleUrl>#icon</styleUrl>
<Point>
<coordinates>
-117,42.6778
</coordinates>
</Point>
</Placemark>
<Placemark>
<name>
            </name>
<styleUrl>#icon</styleUrl>
<Point>
<coordinates>
-117,42.1222
</coordinates>
</Point>
</Placemark>
<Placemark>
<name>
            </name>
<styleUrl>#icon</styleUrl>
<Point>
<coordinates>
-117,41.5667
</coordinates>
</Point>
</Placemark>
<Placemark>
<name>
            </name>
<styleUrl>#icon</styleUrl>
<Point>
<coordinates>
-117,41.0111
</coordinates>
</Point>
</Placemark>
<Placemark>
<name>
            </name>
<styleUrl>#icon</styleUrl>
<Point>
<coordinates>
-117,40.4556
</coordinates>
</Point>
</Placemark>
<Placemark>
<name>
            </name>
<styleUrl>#icon</styleUrl>
<Point>
<coordinates>
-117,39.9
</coordinates>
</Point>
</Placemark>
<Placemark>
<name>
            </name>
<styleUrl>#icon</styleUrl>
<Point>
<coordinates>
-117,39.3444
</coordinates>
</Point>
</Placemark>
<Placemark>
<name>
            </name>
<styleUrl>#icon</styleUrl>
<Point>
<coordinates>
-117,38.7889
</coordinates>
</Point>
</Placemark>
<Placemark>
<name>
            </name>
<styleUrl>#icon</styleUrl>
<Point>
<coordinates>
-117,38.2333
</coordinates>
</Point>
</Placemark>
<Placemark>
<name>
            </name>
<styleUrl>#icon</styleUrl>
<Point>
<coordinates>
-117,37.6778
</coordinates>
</Point>
</Placemark>
<Placemark>
<name>
B (local)    T (local)        </name>
<styleUrl>#icon</styleUrl>
<Point>
<coordinates>
-117,37.1222
</coordinates>
</Point>
</Placemark>
<Placemark>
<name>
B (local)    T (local)        S (local)</name>
<styleUrl>#icon</styleUrl>
<Point>
<coordinates>
-117,36.5667
</coordinates>
</Point>
</Placemark>
<Placemark>
<name>
            </name>
<styleUrl>#icon</styleUrl>
<Point>
<coordinates>
-117,36.0111
</coordinates>
</Point>
</Placemark>
<Placemark>
<name>
            </name>
<styleUrl>#icon</styleUrl>
<Point>
<coordinates>
-117,35.4556
</coordinates>
</Point>
</Placemark>
<Placemark>
<name>
            </name>
<styleUrl>#icon</styleUrl>
<Point>
<coordinates>
-117,34.9
</coordinates>
</Point>
</Placemark>
<Placemark>
<name>
            </name>
<styleUrl>#icon</styleUrl>
<Point>
<coordinates>
-117,32.6778
</coordinates>
</Point>
</Placemark>
<Placemark>
<name>
            </name>
<styleUrl>#icon</styleUrl>
<Point>
<coordinates>
-116.1667,43.7889
</coordinates>
</Point>
</Placemark>
<Placemark>
<name>
            </name>
<styleUrl>#icon</styleUrl>
<Point>
<coordinates>
-116.1667,43.2333
</coordinates>
</Point>
</Placemark>
<Placemark>
<name>
            </name>
<styleUrl>#icon</styleUrl>
<Point>
<coordinates>
-116.1667,42.6778
</coordinates>
</Point>
</Placemark>
<Placemark>
<name>
            </name>
<styleUrl>#icon</styleUrl>
<Point>
<coordinates>
-116.1667,42.1222
</coordinates>
</Point>
</Placemark>
<Placemark>
<name>
            </name>
<styleUrl>#icon</styleUrl>
<Point>
<coordinates>
-116.1667,41.5667
</coordinates>
</Point>
</Placemark>
<Placemark>
<name>
            </name>
<styleUrl>#icon</styleUrl>
<Point>
<coordinates>
-116.1667,41.0111
</coordinates>
</Point>
</Placemark>
<Placemark>
<name>
            </name>
<styleUrl>#icon</styleUrl>
<Point>
<coordinates>
-116.1667,40.4556
</coordinates>
</Point>
</Placemark>
<Placemark>
<name>
            </name>
<styleUrl>#icon</styleUrl>
<Point>
<coordinates>
-116.1667,39.9
</coordinates>
</Point>
</Placemark>
<Placemark>
<name>
            </name>
<styleUrl>#icon</styleUrl>
<Point>
<coordinates>
-116.1667,39.3444
</coordinates>
</Point>
</Placemark>
<Placemark>
<name>
            </name>
<styleUrl>#icon</styleUrl>
<Point>
<coordinates>
-116.1667,38.7889
</coordinates>
</Point>
</Placemark>
<Placemark>
<name>
            </name>
<styleUrl>#icon</styleUrl>
<Point>
<coordinates>
-116.1667,38.2333
</coordinates>
</Point>
</Placemark>
<Placemark>
<name>
            </name>
<styleUrl>#icon</styleUrl>
<Point>
<coordinates>
-116.1667,37.6778
</coordinates>
</Point>
</Placemark>
<Placemark>
<name>
    T (local)        </name>
<styleUrl>#icon</styleUrl>
<Point>
<coordinates>
-116.1667,37.1222
</coordinates>
</Point>
</Placemark>
<Placemark>
<name>
    T (local)        </name>
<styleUrl>#icon</styleUrl>
<Point>
<coordinates>
-116.1667,36.5667
</coordinates>
</Point>
</Placemark>
<Placemark>
<name>
    T (local)        S (local)</name>
<styleUrl>#icon</styleUrl>
<Point>
<coordinates>
-116.1667,36.0111
</coordinates>
</Point>
</Placemark>
<Placemark>
<name>
    T (local)        </name>
<styleUrl>#icon</styleUrl>
<Point>
<coordinates>
-116.1667,35.4556
</coordinates>
</Point>
</Placemark>
<Placemark>
<name>
            </name>
<styleUrl>#icon</styleUrl>
<Point>
<coordinates>
-116.1667,34.9
</coordinates>
</Point>
</Placemark>
<Placemark>
<name>
            </name>
<styleUrl>#icon</styleUrl>
<Point>
<coordinates>
-116.1667,34.3444
</coordinates>
</Point>
</Placemark>
<Placemark>
<name>
            </name>
<styleUrl>#icon</styleUrl>
<Point>
<coordinates>
-116.1667,33.7889
</coordinates>
</Point>
</Placemark>
<Placemark>
<name>
            </name>
<styleUrl>#icon</styleUrl>
<Point>
<coordinates>
-116.1667,33.2333
</coordinates>
</Point>
</Placemark>
<Placemark>
<name>
            </name>
<styleUrl>#icon</styleUrl>
<Point>
<coordinates>
-116.1667,32.1222
</coordinates>
</Point>
</Placemark>
<Placemark>
<name>
            </name>
<styleUrl>#icon</styleUrl>
<Point>
<coordinates>
-116.1667,31.5667
</coordinates>
</Point>
</Placemark>
<Placemark>
<name>
            </name>
<styleUrl>#icon</styleUrl>
<Point>
<coordinates>
-115.3333,42.6778
</coordinates>
</Point>
</Placemark>
<Placemark>
<name>
            </name>
<styleUrl>#icon</styleUrl>
<Point>
<coordinates>
-115.3333,42.1222
</coordinates>
</Point>
</Placemark>
<Placemark>
<name>
            </name>
<styleUrl>#icon</styleUrl>
<Point>
<coordinates>
-115.3333,41.5667
</coordinates>
</Point>
</Placemark>
<Placemark>
<name>
            </name>
<styleUrl>#icon</styleUrl>
<Point>
<coordinates>
-115.3333,41.0111
</coordinates>
</Point>
</Placemark>
<Placemark>
<name>
            </name>
<styleUrl>#icon</styleUrl>
<Point>
<coordinates>
-115.3333,40.4556
</coordinates>
</Point>
</Placemark>
<Placemark>
<name>
            </name>
<styleUrl>#icon</styleUrl>
<Point>
<coordinates>
-115.3333,39.9
</coordinates>
</Point>
</Placemark>
<Placemark>
<name>
            </name>
<styleUrl>#icon</styleUrl>
<Point>
<coordinates>
-115.3333,39.3444
</coordinates>
</Point>
</Placemark>
<Placemark>
<name>
            </name>
<styleUrl>#icon</styleUrl>
<Point>
<coordinates>
-115.3333,38.7889
</coordinates>
</Point>
</Placemark>
<Placemark>
<name>
            </name>
<styleUrl>#icon</styleUrl>
<Point>
<coordinates>
-115.3333,38.2333
</coordinates>
</Point>
</Placemark>
<Placemark>
<name>
            </name>
<styleUrl>#icon</styleUrl>
<Point>
<coordinates>
-115.3333,37.6778
</coordinates>
</Point>
</Placemark>
<Placemark>
<name>
            </name>
<styleUrl>#icon</styleUrl>
<Point>
<coordinates>
-115.3333,37.1222
</coordinates>
</Point>
</Placemark>
<Placemark>
<name>
            </name>
<styleUrl>#icon</styleUrl>
<Point>
<coordinates>
-115.3333,36.5667
</coordinates>
</Point>
</Placemark>
<Placemark>
<name>
            </name>
<styleUrl>#icon</styleUrl>
<Point>
<coordinates>
-115.3333,36.0111
</coordinates>
</Point>
</Placemark>
<Placemark>
<name>
            </name>
<styleUrl>#icon</styleUrl>
<Point>
<coordinates>
-115.3333,35.4556
</coordinates>
</Point>
</Placemark>
<Placemark>
<name>
    T (local)        S (local)</name>
<styleUrl>#icon</styleUrl>
<Point>
<coordinates>
-115.3333,34.9
</coordinates>
</Point>
</Placemark>
<Placemark>
<name>
    T (local)        </name>
<styleUrl>#icon</styleUrl>
<Point>
<coordinates>
-115.3333,34.3444
</coordinates>
</Point>
</Placemark>
<Placemark>
<name>
    T (local)        </name>
<styleUrl>#icon</styleUrl>
<Point>
<coordinates>
-115.3333,33.7889
</coordinates>
</Point>
</Placemark>
<Placemark>
<name>
    T (sparse)        </name>
<styleUrl>#icon</styleUrl>
<Point>
<coordinates>
-115.3333,33.2333
</coordinates>
</Point>
</Placemark>
<Placemark>
<name>
            </name>
<styleUrl>#icon</styleUrl>
<Point>
<coordinates>
-115.3333,32.6778
</coordinates>
</Point>
</Placemark>
<Placemark>
<name>
            </name>
<styleUrl>#icon</styleUrl>
<Point>
<coordinates>
-115.3333,32.1222
</coordinates>
</Point>
</Placemark>
<Placemark>
<name>
            </name>
<styleUrl>#icon</styleUrl>
<Point>
<coordinates>
-115.3333,31.5667
</coordinates>
</Point>
</Placemark>
<Placemark>
<name>
            </name>
<styleUrl>#icon</styleUrl>
<Point>
<coordinates>
-115.3333,31.0111
</coordinates>
</Point>
</Placemark>
<Placemark>
<name>
            </name>
<styleUrl>#icon</styleUrl>
<Point>
<coordinates>
-115.3333,30.4556
</coordinates>
</Point>
</Placemark>
<Placemark>
<name>
            </name>
<styleUrl>#icon</styleUrl>
<Point>
<coordinates>
-115.3333,29.9
</coordinates>
</Point>
</Placemark>
<Placemark>
<name>
            </name>
<styleUrl>#icon</styleUrl>
<Point>
<coordinates>
-114.5,43.2333
</coordinates>
</Point>
</Placemark>
<Placemark>
<name>
            </name>
<styleUrl>#icon</styleUrl>
<Point>
<coordinates>
-114.5,42.6778
</coordinates>
</Point>
</Placemark>
<Placemark>
<name>
            </name>
<styleUrl>#icon</styleUrl>
<Point>
<coordinates>
-114.5,42.1222
</coordinates>
</Point>
</Placemark>
<Placemark>
<name>
            </name>
<styleUrl>#icon</styleUrl>
<Point>
<coordinates>
-114.5,41.5667
</coordinates>
</Point>
</Placemark>
<Placemark>
<name>
            </name>
<styleUrl>#icon</styleUrl>
<Point>
<coordinates>
-114.5,41.0111
</coordinates>
</Point>
</Placemark>
<Placemark>
<name>
            </name>
<styleUrl>#icon</styleUrl>
<Point>
<coordinates>
-114.5,40.4556
</coordinates>
</Point>
</Placemark>
<Placemark>
<name>
            </name>
<styleUrl>#icon</styleUrl>
<Point>
<coordinates>
-114.5,39.9
</coordinates>
</Point>
</Placemark>
<Placemark>
<name>
            </name>
<styleUrl>#icon</styleUrl>
<Point>
<coordinates>
-114.5,39.3444
</coordinates>
</Point>
</Placemark>
<Placemark>
<name>
            </name>
<styleUrl>#icon</styleUrl>
<Point>
<coordinates>
-114.5,38.7889
</coordinates>
</Point>
</Placemark>
<Placemark>
<name>
            </name>
<styleUrl>#icon</styleUrl>
<Point>
<coordinates>
-114.5,38.2333
</coordinates>
</Point>
</Placemark>
<Placemark>
<name>
            </name>
<styleUrl>#icon</styleUrl>
<Point>
<coordinates>
-114.5,37.6778
</coordinates>
</Point>
</Placemark>
<Placemark>
<name>
            </name>
<styleUrl>#icon</styleUrl>
<Point>
<coordinates>
-114.5,37.1222
</coordinates>
</Point>
</Placemark>
<Placemark>
<name>
            </name>
<styleUrl>#icon</styleUrl>
<Point>
<coordinates>
-114.5,36.5667
</coordinates>
</Point>
</Placemark>
<Placemark>
<name>
            </name>
<styleUrl>#icon</styleUrl>
<Point>
<coordinates>
-114.5,36.0111
</coordinates>
</Point>
</Placemark>
<Placemark>
<name>
            </name>
<styleUrl>#icon</styleUrl>
<Point>
<coordinates>
-114.5,35.4556
</coordinates>
</Point>
</Placemark>
<Placemark>
<name>
            </name>
<styleUrl>#icon</styleUrl>
<Point>
<coordinates>
-114.5,34.9
</coordinates>
</Point>
</Placemark>
<Placemark>
<name>
    T (local)        </name>
<styleUrl>#icon</styleUrl>
<Point>
<coordinates>
-114.5,34.3444
</coordinates>
</Point>
</Placemark>
<Placemark>
<name>
            </name>
<styleUrl>#icon</styleUrl>
<Point>
<coordinates>
-114.5,33.7889
</coordinates>
</Point>
</Placemark>
<Placemark>
<name>
    T (local)        </name>
<styleUrl>#icon</styleUrl>
<Point>
<coordinates>
-114.5,33.2333
</coordinates>
</Point>
</Placemark>
<Placemark>
<name>
B (local)    T (sparse)        </name>
<styleUrl>#icon</styleUrl>
<Point>
<coordinates>
-114.5,32.6778
</coordinates>
</Point>
</Placemark>
<Placemark>
<name>
    T (sparse)        S (sparse)</name>
<styleUrl>#icon</styleUrl>
<Point>
<coordinates>
-114.5,32.1222
</coordinates>
</Point>
</Placemark>
<Placemark>
<name>
            </name>
<styleUrl>#icon</styleUrl>
<Point>
<coordinates>
-114.5,29.9
</coordinates>
</Point>
</Placemark>
<Placemark>
<name>
            </name>
<styleUrl>#icon</styleUrl>
<Point>
<coordinates>
-114.5,29.3444
</coordinates>
</Point>
</Placemark>
<Placemark>
<name>
            </name>
<styleUrl>#icon</styleUrl>
<Point>
<coordinates>
-114.5,27.6778
</coordinates>
</Point>
</Placemark>
<Placemark>
<name>
            </name>
<styleUrl>#icon</styleUrl>
<Point>
<coordinates>
-113.6667,45.4556
</coordinates>
</Point>
</Placemark>
<Placemark>
<name>
            </name>
<styleUrl>#icon</styleUrl>
<Point>
<coordinates>
-113.6667,44.9
</coordinates>
</Point>
</Placemark>
<Placemark>
<name>
            </name>
<styleUrl>#icon</styleUrl>
<Point>
<coordinates>
-113.6667,44.3444
</coordinates>
</Point>
</Placemark>
<Placemark>
<name>
            </name>
<styleUrl>#icon</styleUrl>
<Point>
<coordinates>
-113.6667,43.2333
</coordinates>
</Point>
</Placemark>
<Placemark>
<name>
            </name>
<styleUrl>#icon</styleUrl>
<Point>
<coordinates>
-113.6667,42.6778
</coordinates>
</Point>
</Placemark>
<Placemark>
<name>
            </name>
<styleUrl>#icon</styleUrl>
<Point>
<coordinates>
-113.6667,42.1222
</coordinates>
</Point>
</Placemark>
<Placemark>
<name>
            </name>
<styleUrl>#icon</styleUrl>
<Point>
<coordinates>
-113.6667,41.5667
</coordinates>
</Point>
</Placemark>
<Placemark>
<name>
    T (local)    L (local)    </name>
<styleUrl>#icon</styleUrl>
<Point>
<coordinates>
-113.6667,41.0111
</coordinates>
</Point>
</Placemark>
<Placemark>
<name>
        L (local)    </name>
<styleUrl>#icon</styleUrl>
<Point>
<coordinates>
-113.6667,40.4556
</coordinates>
</Point>
</Placemark>
<Placemark>
<name>
            </name>
<styleUrl>#icon</styleUrl>
<Point>
<coordinates>
-113.6667,39.9
</coordinates>
</Point>
</Placemark>
<Placemark>
<name>
            </name>
<styleUrl>#icon</styleUrl>
<Point>
<coordinates>
-113.6667,39.3444
</coordinates>
</Point>
</Placemark>
<Placemark>
<name>
            </name>
<styleUrl>#icon</styleUrl>
<Point>
<coordinates>
-113.6667,38.7889
</coordinates>
</Point>
</Placemark>
<Placemark>
<name>
    T (local)        </name>
<styleUrl>#icon</styleUrl>
<Point>
<coordinates>
-113.6667,38.2333
</coordinates>
</Point>
</Placemark>
<Placemark>
<name>
            </name>
<styleUrl>#icon</styleUrl>
<Point>
<coordinates>
-113.6667,37.6778
</coordinates>
</Point>
</Placemark>
<Placemark>
<name>
            </name>
<styleUrl>#icon</styleUrl>
<Point>
<coordinates>
-113.6667,37.1222
</coordinates>
</Point>
</Placemark>
<Placemark>
<name>
            </name>
<styleUrl>#icon</styleUrl>
<Point>
<coordinates>
-113.6667,36.5667
</coordinates>
</Point>
</Placemark>
<Placemark>
<name>
            </name>
<styleUrl>#icon</styleUrl>
<Point>
<coordinates>
-113.6667,36.0111
</coordinates>
</Point>
</Placemark>
<Placemark>
<name>
            </name>
<styleUrl>#icon</styleUrl>
<Point>
<coordinates>
-113.6667,35.4556
</coordinates>
</Point>
</Placemark>
<Placemark>
<name>
            </name>
<styleUrl>#icon</styleUrl>
<Point>
<coordinates>
-113.6667,34.9
</coordinates>
</Point>
</Placemark>
<Placemark>
<name>
            </name>
<styleUrl>#icon</styleUrl>
<Point>
<coordinates>
-113.6667,34.3444
</coordinates>
</Point>
</Placemark>
<Placemark>
<name>
            </name>
<styleUrl>#icon</styleUrl>
<Point>
<coordinates>
-113.6667,33.7889
</coordinates>
</Point>
</Placemark>
<Placemark>
<name>
            </name>
<styleUrl>#icon</styleUrl>
<Point>
<coordinates>
-113.6667,33.2333
</coordinates>
</Point>
</Placemark>
<Placemark>
<name>
            </name>
<styleUrl>#icon</styleUrl>
<Point>
<coordinates>
-113.6667,32.6778
</coordinates>
</Point>
</Placemark>
<Placemark>
<name>
    T (partial)        S (sparse)</name>
<styleUrl>#icon</styleUrl>
<Point>
<coordinates>
-113.6667,32.1222
</coordinates>
</Point>
</Placemark>
<Placemark>
<name>
    T (partial)    L (local)    </name>
<styleUrl>#icon</styleUrl>
<Point>
<coordinates>
-113.6667,31.5667
</coordinates>
</Point>
</Placemark>
<Placemark>
<name>
            </name>
<styleUrl>#icon</styleUrl>
<Point>
<coordinates>
-113.6667,29.3444
</coordinates>
</Point>
</Placemark>
<Placemark>
<name>
            </name>
<styleUrl>#icon</styleUrl>
<Point>
<coordinates>
-113.6667,28.7889
</coordinates>
</Point>
</Placemark>
<Placemark>
<name>
B (local)    T (sparse)        </name>
<styleUrl>#icon</styleUrl>
<Point>
<coordinates>
-113.6667,28.2333
</coordinates>
</Point>
</Placemark>
<Placemark>
<name>
    T (local)        </name>
<styleUrl>#icon</styleUrl>
<Point>
<coordinates>
-113.6667,27.6778
</coordinates>
</Point>
</Placemark>
<Placemark>
<name>
B (local)    T (local)        </name>
<styleUrl>#icon</styleUrl>
<Point>
<coordinates>
-113.6667,27.1222
</coordinates>
</Point>
</Placemark>
<Placemark>
<name>
            </name>
<styleUrl>#icon</styleUrl>
<Point>
<coordinates>
-112.8333,50.4556
</coordinates>
</Point>
</Placemark>
<Placemark>
<name>
            </name>
<styleUrl>#icon</styleUrl>
<Point>
<coordinates>
-112.8333,49.9
</coordinates>
</Point>
</Placemark>
<Placemark>
<name>
            </name>
<styleUrl>#icon</styleUrl>
<Point>
<coordinates>
-112.8333,48.7889
</coordinates>
</Point>
</Placemark>
<Placemark>
<name>
            </name>
<styleUrl>#icon</styleUrl>
<Point>
<coordinates>
-112.8333,48.2333
</coordinates>
</Point>
</Placemark>
<Placemark>
<name>
            </name>
<styleUrl>#icon</styleUrl>
<Point>
<coordinates>
-112.8333,46.5667
</coordinates>
</Point>
</Placemark>
<Placemark>
<name>
            </name>
<styleUrl>#icon</styleUrl>
<Point>
<coordinates>
-112.8333,46.0111
</coordinates>
</Point>
</Placemark>
<Placemark>
<name>
            </name>
<styleUrl>#icon</styleUrl>
<Point>
<coordinates>
-112.8333,45.4556
</coordinates>
</Point>
</Placemark>
<Placemark>
<name>
            </name>
<styleUrl>#icon</styleUrl>
<Point>
<coordinates>
-112.8333,44.9
</coordinates>
</Point>
</Placemark>
<Placemark>
<name>
            </name>
<styleUrl>#icon</styleUrl>
<Point>
<coordinates>
-112.8333,44.3444
</coordinates>
</Point>
</Placemark>
<Placemark>
<name>
            </name>
<styleUrl>#icon</styleUrl>
<Point>
<coordinates>
-112.8333,43.7889
</coordinates>
</Point>
</Placemark>
<Placemark>
<name>
            </name>
<styleUrl>#icon</styleUrl>
<Point>
<coordinates>
-112.8333,43.2333
</coordinates>
</Point>
</Placemark>
<Placemark>
<name>
            </name>
<styleUrl>#icon</styleUrl>
<Point>
<coordinates>
-112.8333,42.6778
</coordinates>
</Point>
</Placemark>
<Placemark>
<name>
            </name>
<styleUrl>#icon</styleUrl>
<Point>
<coordinates>
-112.8333,42.1222
</coordinates>
</Point>
</Placemark>
<Placemark>
<name>
            </name>
<styleUrl>#icon</styleUrl>
<Point>
<coordinates>
-112.8333,41.5667
</coordinates>
</Point>
</Placemark>
<Placemark>
<name>
            </name>
<styleUrl>#icon</styleUrl>
<Point>
<coordinates>
-112.8333,41.0111
</coordinates>
</Point>
</Placemark>
<Placemark>
<name>
            </name>
<styleUrl>#icon</styleUrl>
<Point>
<coordinates>
-112.8333,40.4556
</coordinates>
</Point>
</Placemark>
<Placemark>
<name>
            </name>
<styleUrl>#icon</styleUrl>
<Point>
<coordinates>
-112.8333,39.9
</coordinates>
</Point>
</Placemark>
<Placemark>
<name>
            </name>
<styleUrl>#icon</styleUrl>
<Point>
<coordinates>
-112.8333,39.3444
</coordinates>
</Point>
</Placemark>
<Placemark>
<name>
            </name>
<styleUrl>#icon</styleUrl>
<Point>
<coordinates>
-112.8333,38.7889
</coordinates>
</Point>
</Placemark>
<Placemark>
<name>
            </name>
<styleUrl>#icon</styleUrl>
<Point>
<coordinates>
-112.8333,38.2333
</coordinates>
</Point>
</Placemark>
<Placemark>
<name>
            </name>
<styleUrl>#icon</styleUrl>
<Point>
<coordinates>
-112.8333,37.6778
</coordinates>
</Point>
</Placemark>
<Placemark>
<name>
            </name>
<styleUrl>#icon</styleUrl>
<Point>
<coordinates>
-112.8333,37.1222
</coordinates>
</Point>
</Placemark>
<Placemark>
<name>
            </name>
<styleUrl>#icon</styleUrl>
<Point>
<coordinates>
-112.8333,36.5667
</coordinates>
</Point>
</Placemark>
<Placemark>
<name>
            </name>
<styleUrl>#icon</styleUrl>
<Point>
<coordinates>
-112.8333,36.0111
</coordinates>
</Point>
</Placemark>
<Placemark>
<name>
            </name>
<styleUrl>#icon</styleUrl>
<Point>
<coordinates>
-112.8333,35.4556
</coordinates>
</Point>
</Placemark>
<Placemark>
<name>
            </name>
<styleUrl>#icon</styleUrl>
<Point>
<coordinates>
-112.8333,34.9
</coordinates>
</Point>
</Placemark>
<Placemark>
<name>
            </name>
<styleUrl>#icon</styleUrl>
<Point>
<coordinates>
-112.8333,34.3444
</coordinates>
</Point>
</Placemark>
<Placemark>
<name>
            </name>
<styleUrl>#icon</styleUrl>
<Point>
<coordinates>
-112.8333,33.7889
</coordinates>
</Point>
</Placemark>
<Placemark>
<name>
            </name>
<styleUrl>#icon</styleUrl>
<Point>
<coordinates>
-112.8333,33.2333
</coordinates>
</Point>
</Placemark>
<Placemark>
<name>
            </name>
<styleUrl>#icon</styleUrl>
<Point>
<coordinates>
-112.8333,32.6778
</coordinates>
</Point>
</Placemark>
<Placemark>
<name>
            </name>
<styleUrl>#icon</styleUrl>
<Point>
<coordinates>
-112.8333,32.1222
</coordinates>
</Point>
</Placemark>
<Placemark>
<name>
            </name>
<styleUrl>#icon</styleUrl>
<Point>
<coordinates>
-112.8333,31.5667
</coordinates>
</Point>
</Placemark>
<Placemark>
<name>
    T (local)        </name>
<styleUrl>#icon</styleUrl>
<Point>
<coordinates>
-112.8333,31.0111
</coordinates>
</Point>
</Placemark>
<Placemark>
<name>
            </name>
<styleUrl>#icon</styleUrl>
<Point>
<coordinates>
-112.8333,28.2333
</coordinates>
</Point>
</Placemark>
<Placemark>
<name>
            </name>
<styleUrl>#icon</styleUrl>
<Point>
<coordinates>
-112.8333,27.6778
</coordinates>
</Point>
</Placemark>
<Placemark>
<name>
            </name>
<styleUrl>#icon</styleUrl>
<Point>
<coordinates>
-112.8333,27.1222
</coordinates>
</Point>
</Placemark>
<Placemark>
<name>
            </name>
<styleUrl>#icon</styleUrl>
<Point>
<coordinates>
-112,51.5667
</coordinates>
</Point>
</Placemark>
<Placemark>
<name>
            </name>
<styleUrl>#icon</styleUrl>
<Point>
<coordinates>
-112,51.0111
</coordinates>
</Point>
</Placemark>
<Placemark>
<name>
            </name>
<styleUrl>#icon</styleUrl>
<Point>
<coordinates>
-112,50.4556
</coordinates>
</Point>
</Placemark>
<Placemark>
<name>
            </name>
<styleUrl>#icon</styleUrl>
<Point>
<coordinates>
-112,49.9
</coordinates>
</Point>
</Placemark>
<Placemark>
<name>
            </name>
<styleUrl>#icon</styleUrl>
<Point>
<coordinates>
-112,49.3444
</coordinates>
</Point>
</Placemark>
<Placemark>
<name>
            </name>
<styleUrl>#icon</styleUrl>
<Point>
<coordinates>
-112,48.7889
</coordinates>
</Point>
</Placemark>
<Placemark>
<name>
            </name>
<styleUrl>#icon</styleUrl>
<Point>
<coordinates>
-112,48.2333
</coordinates>
</Point>
</Placemark>
<Placemark>
<name>
            </name>
<styleUrl>#icon</styleUrl>
<Point>
<coordinates>
-112,47.6778
</coordinates>
</Point>
</Placemark>
<Placemark>
<name>
            </name>
<styleUrl>#icon</styleUrl>
<Point>
<coordinates>
-112,47.1222
</coordinates>
</Point>
</Placemark>
<Placemark>
<name>
            </name>
<styleUrl>#icon</styleUrl>
<Point>
<coordinates>
-112,46.0111
</coordinates>
</Point>
</Placemark>
<Placemark>
<name>
            </name>
<styleUrl>#icon</styleUrl>
<Point>
<coordinates>
-112,45.4556
</coordinates>
</Point>
</Placemark>
<Placemark>
<name>
            </name>
<styleUrl>#icon</styleUrl>
<Point>
<coordinates>
-112,44.3444
</coordinates>
</Point>
</Placemark>
<Placemark>
<name>
            </name>
<styleUrl>#icon</styleUrl>
<Point>
<coordinates>
-112,43.7889
</coordinates>
</Point>
</Placemark>
<Placemark>
<name>
            </name>
<styleUrl>#icon</styleUrl>
<Point>
<coordinates>
-112,43.2333
</coordinates>
</Point>
</Placemark>
<Placemark>
<name>
            </name>
<styleUrl>#icon</styleUrl>
<Point>
<coordinates>
-112,42.6778
</coordinates>
</Point>
</Placemark>
<Placemark>
<name>
            </name>
<styleUrl>#icon</styleUrl>
<Point>
<coordinates>
-112,42.1222
</coordinates>
</Point>
</Placemark>
<Placemark>
<name>
            </name>
<styleUrl>#icon</styleUrl>
<Point>
<coordinates>
-112,41.5667
</coordinates>
</Point>
</Placemark>
<Placemark>
<name>
            </name>
<styleUrl>#icon</styleUrl>
<Point>
<coordinates>
-112,41.0111
</coordinates>
</Point>
</Placemark>
<Placemark>
<name>
            </name>
<styleUrl>#icon</styleUrl>
<Point>
<coordinates>
-112,40.4556
</coordinates>
</Point>
</Placemark>
<Placemark>
<name>
B (local)    T (local)        </name>
<styleUrl>#icon</styleUrl>
<Point>
<coordinates>
-112,39.9
</coordinates>
</Point>
</Placemark>
<Placemark>
<name>
            </name>
<styleUrl>#icon</styleUrl>
<Point>
<coordinates>
-112,39.3444
</coordinates>
</Point>
</Placemark>
<Placemark>
<name>
            </name>
<styleUrl>#icon</styleUrl>
<Point>
<coordinates>
-112,38.7889
</coordinates>
</Point>
</Placemark>
<Placemark>
<name>
            </name>
<styleUrl>#icon</styleUrl>
<Point>
<coordinates>
-112,38.2333
</coordinates>
</Point>
</Placemark>
<Placemark>
<name>
            </name>
<styleUrl>#icon</styleUrl>
<Point>
<coordinates>
-112,37.6778
</coordinates>
</Point>
</Placemark>
<Placemark>
<name>
            </name>
<styleUrl>#icon</styleUrl>
<Point>
<coordinates>
-112,37.1222
</coordinates>
</Point>
</Placemark>
<Placemark>
<name>
            </name>
<styleUrl>#icon</styleUrl>
<Point>
<coordinates>
-112,36.5667
</coordinates>
</Point>
</Placemark>
<Placemark>
<name>
            </name>
<styleUrl>#icon</styleUrl>
<Point>
<coordinates>
-112,36.0111
</coordinates>
</Point>
</Placemark>
<Placemark>
<name>
            </name>
<styleUrl>#icon</styleUrl>
<Point>
<coordinates>
-112,35.4556
</coordinates>
</Point>
</Placemark>
<Placemark>
<name>
            </name>
<styleUrl>#icon</styleUrl>
<Point>
<coordinates>
-112,34.9
</coordinates>
</Point>
</Placemark>
<Placemark>
<name>
            </name>
<styleUrl>#icon</styleUrl>
<Point>
<coordinates>
-112,34.3444
</coordinates>
</Point>
</Placemark>
<Placemark>
<name>
            </name>
<styleUrl>#icon</styleUrl>
<Point>
<coordinates>
-112,33.7889
</coordinates>
</Point>
</Placemark>
<Placemark>
<name>
            </name>
<styleUrl>#icon</styleUrl>
<Point>
<coordinates>
-112,33.2333
</coordinates>
</Point>
</Placemark>
<Placemark>
<name>
            </name>
<styleUrl>#icon</styleUrl>
<Point>
<coordinates>
-112,32.6778
</coordinates>
</Point>
</Placemark>
<Placemark>
<name>
            </name>
<styleUrl>#icon</styleUrl>
<Point>
<coordinates>
-112,32.1222
</coordinates>
</Point>
</Placemark>
<Placemark>
<name>
            </name>
<styleUrl>#icon</styleUrl>
<Point>
<coordinates>
-112,31.5667
</coordinates>
</Point>
</Placemark>
<Placemark>
<name>
            </name>
<styleUrl>#icon</styleUrl>
<Point>
<coordinates>
-112,31.0111
</coordinates>
</Point>
</Placemark>
<Placemark>
<name>
            </name>
<styleUrl>#icon</styleUrl>
<Point>
<coordinates>
-112,30.4556
</coordinates>
</Point>
</Placemark>
<Placemark>
<name>
            </name>
<styleUrl>#icon</styleUrl>
<Point>
<coordinates>
-112,29.9
</coordinates>
</Point>
</Placemark>
<Placemark>
<name>
            </name>
<styleUrl>#icon</styleUrl>
<Point>
<coordinates>
-112,29.3444
</coordinates>
</Point>
</Placemark>
<Placemark>
<name>
            </name>
<styleUrl>#icon</styleUrl>
<Point>
<coordinates>
-112,27.1222
</coordinates>
</Point>
</Placemark>
<Placemark>
<name>
            </name>
<styleUrl>#icon</styleUrl>
<Point>
<coordinates>
-112,26.5667
</coordinates>
</Point>
</Placemark>
<Placemark>
<name>
            </name>
<styleUrl>#icon</styleUrl>
<Point>
<coordinates>
-112,26.0111
</coordinates>
</Point>
</Placemark>
<Placemark>
<name>
    T (local)        </name>
<styleUrl>#icon</styleUrl>
<Point>
<coordinates>
-112,25.4556
</coordinates>
</Point>
</Placemark>
<Placemark>
<name>
            </name>
<styleUrl>#icon</styleUrl>
<Point>
<coordinates>
-111.1667,51.5667
</coordinates>
</Point>
</Placemark>
<Placemark>
<name>
            </name>
<styleUrl>#icon</styleUrl>
<Point>
<coordinates>
-111.1667,51.0111
</coordinates>
</Point>
</Placemark>
<Placemark>
<name>
            </name>
<styleUrl>#icon</styleUrl>
<Point>
<coordinates>
-111.1667,50.4556
</coordinates>
</Point>
</Placemark>
<Placemark>
<name>
            </name>
<styleUrl>#icon</styleUrl>
<Point>
<coordinates>
-111.1667,49.9
</coordinates>
</Point>
</Placemark>
<Placemark>
<name>
            </name>
<styleUrl>#icon</styleUrl>
<Point>
<coordinates>
-111.1667,49.3444
</coordinates>
</Point>
</Placemark>
<Placemark>
<name>
            </name>
<styleUrl>#icon</styleUrl>
<Point>
<coordinates>
-111.1667,48.7889
</coordinates>
</Point>
</Placemark>
<Placemark>
<name>
            </name>
<styleUrl>#icon</styleUrl>
<Point>
<coordinates>
-111.1667,48.2333
</coordinates>
</Point>
</Placemark>
<Placemark>
<name>
            </name>
<styleUrl>#icon</styleUrl>
<Point>
<coordinates>
-111.1667,47.6778
</coordinates>
</Point>
</Placemark>
<Placemark>
<name>
            </name>
<styleUrl>#icon</styleUrl>
<Point>
<coordinates>
-111.1667,46.5667
</coordinates>
</Point>
</Placemark>
<Placemark>
<name>
            </name>
<styleUrl>#icon</styleUrl>
<Point>
<coordinates>
-111.1667,46.0111
</coordinates>
</Point>
</Placemark>
<Placemark>
<name>
            </name>
<styleUrl>#icon</styleUrl>
<Point>
<coordinates>
-111.1667,42.6778
</coordinates>
</Point>
</Placemark>
<Placemark>
<name>
            </name>
<styleUrl>#icon</styleUrl>
<Point>
<coordinates>
-111.1667,42.1222
</coordinates>
</Point>
</Placemark>
<Placemark>
<name>
            </name>
<styleUrl>#icon</styleUrl>
<Point>
<coordinates>
-111.1667,41.5667
</coordinates>
</Point>
</Placemark>
<Placemark>
<name>
            </name>
<styleUrl>#icon</styleUrl>
<Point>
<coordinates>
-111.1667,39.3444
</coordinates>
</Point>
</Placemark>
<Placemark>
<name>
            </name>
<styleUrl>#icon</styleUrl>
<Point>
<coordinates>
-111.1667,38.7889
</coordinates>
</Point>
</Placemark>
<Placemark>
<name>
            </name>
<styleUrl>#icon</styleUrl>
<Point>
<coordinates>
-111.1667,38.2333
</coordinates>
</Point>
</Placemark>
<Placemark>
<name>
            </name>
<styleUrl>#icon</styleUrl>
<Point>
<coordinates>
-111.1667,37.6778
</coordinates>
</Point>
</Placemark>
<Placemark>
<name>
            </name>
<styleUrl>#icon</styleUrl>
<Point>
<coordinates>
-111.1667,37.1222
</coordinates>
</Point>
</Placemark>
<Placemark>
<name>
            </name>
<styleUrl>#icon</styleUrl>
<Point>
<coordinates>
-111.1667,36.5667
</coordinates>
</Point>
</Placemark>
<Placemark>
<name>
            </name>
<styleUrl>#icon</styleUrl>
<Point>
<coordinates>
-111.1667,36.0111
</coordinates>
</Point>
</Placemark>
<Placemark>
<name>
            </name>
<styleUrl>#icon</styleUrl>
<Point>
<coordinates>
-111.1667,35.4556
</coordinates>
</Point>
</Placemark>
<Placemark>
<name>
            </name>
<styleUrl>#icon</styleUrl>
<Point>
<coordinates>
-111.1667,33.7889
</coordinates>
</Point>
</Placemark>
<Placemark>
<name>
            </name>
<styleUrl>#icon</styleUrl>
<Point>
<coordinates>
-111.1667,33.2333
</coordinates>
</Point>
</Placemark>
<Placemark>
<name>
            </name>
<styleUrl>#icon</styleUrl>
<Point>
<coordinates>
-111.1667,32.6778
</coordinates>
</Point>
</Placemark>
<Placemark>
<name>
            </name>
<styleUrl>#icon</styleUrl>
<Point>
<coordinates>
-111.1667,32.1222
</coordinates>
</Point>
</Placemark>
<Placemark>
<name>
            </name>
<styleUrl>#icon</styleUrl>
<Point>
<coordinates>
-111.1667,31.5667
</coordinates>
</Point>
</Placemark>
<Placemark>
<name>
            </name>
<styleUrl>#icon</styleUrl>
<Point>
<coordinates>
-111.1667,31.0111
</coordinates>
</Point>
</Placemark>
<Placemark>
<name>
            </name>
<styleUrl>#icon</styleUrl>
<Point>
<coordinates>
-111.1667,30.4556
</coordinates>
</Point>
</Placemark>
<Placemark>
<name>
            </name>
<styleUrl>#icon</styleUrl>
<Point>
<coordinates>
-111.1667,29.9
</coordinates>
</Point>
</Placemark>
<Placemark>
<name>
            </name>
<styleUrl>#icon</styleUrl>
<Point>
<coordinates>
-111.1667,29.3444
</coordinates>
</Point>
</Placemark>
<Placemark>
<name>
            </name>
<styleUrl>#icon</styleUrl>
<Point>
<coordinates>
-111.1667,28.7889
</coordinates>
</Point>
</Placemark>
<Placemark>
<name>
            </name>
<styleUrl>#icon</styleUrl>
<Point>
<coordinates>
-111.1667,25.4556
</coordinates>
</Point>
</Placemark>
<Placemark>
<name>
            </name>
<styleUrl>#icon</styleUrl>
<Point>
<coordinates>
-111.1667,24.9
</coordinates>
</Point>
</Placemark>
<Placemark>
<name>
            </name>
<styleUrl>#icon</styleUrl>
<Point>
<coordinates>
-110.3333,51.5667
</coordinates>
</Point>
</Placemark>
<Placemark>
<name>
            </name>
<styleUrl>#icon</styleUrl>
<Point>
<coordinates>
-110.3333,51.0111
</coordinates>
</Point>
</Placemark>
<Placemark>
<name>
            </name>
<styleUrl>#icon</styleUrl>
<Point>
<coordinates>
-110.3333,50.4556
</coordinates>
</Point>
</Placemark>
<Placemark>
<name>
            </name>
<styleUrl>#icon</styleUrl>
<Point>
<coordinates>
-110.3333,49.9
</coordinates>
</Point>
</Placemark>
<Placemark>
<name>
            </name>
<styleUrl>#icon</styleUrl>
<Point>
<coordinates>
-110.3333,49.3444
</coordinates>
</Point>
</Placemark>
<Placemark>
<name>
            </name>
<styleUrl>#icon</styleUrl>
<Point>
<coordinates>
-110.3333,48.7889
</coordinates>
</Point>
</Placemark>
<Placemark>
<name>
            </name>
<styleUrl>#icon</styleUrl>
<Point>
<coordinates>
-110.3333,48.2333
</coordinates>
</Point>
</Placemark>
<Placemark>
<name>
            </name>
<styleUrl>#icon</styleUrl>
<Point>
<coordinates>
-110.3333,47.6778
</coordinates>
</Point>
</Placemark>
<Placemark>
<name>
            </name>
<styleUrl>#icon</styleUrl>
<Point>
<coordinates>
-110.3333,42.6778
</coordinates>
</Point>
</Placemark>
<Placemark>
<name>
            </name>
<styleUrl>#icon</styleUrl>
<Point>
<coordinates>
-110.3333,42.1222
</coordinates>
</Point>
</Placemark>
<Placemark>
<name>
            </name>
<styleUrl>#icon</styleUrl>
<Point>
<coordinates>
-110.3333,41.5667
</coordinates>
</Point>
</Placemark>
<Placemark>
<name>
            </name>
<styleUrl>#icon</styleUrl>
<Point>
<coordinates>
-110.3333,40.4556
</coordinates>
</Point>
</Placemark>
<Placemark>
<name>
            </name>
<styleUrl>#icon</styleUrl>
<Point>
<coordinates>
-110.3333,39.9
</coordinates>
</Point>
</Placemark>
<Placemark>
<name>
            </name>
<styleUrl>#icon</styleUrl>
<Point>
<coordinates>
-110.3333,39.3444
</coordinates>
</Point>
</Placemark>
<Placemark>
<name>
            </name>
<styleUrl>#icon</styleUrl>
<Point>
<coordinates>
-110.3333,38.7889
</coordinates>
</Point>
</Placemark>
<Placemark>
<name>
            </name>
<styleUrl>#icon</styleUrl>
<Point>
<coordinates>
-110.3333,38.2333
</coordinates>
</Point>
</Placemark>
<Placemark>
<name>
            </name>
<styleUrl>#icon</styleUrl>
<Point>
<coordinates>
-110.3333,37.6778
</coordinates>
</Point>
</Placemark>
<Placemark>
<name>
            </name>
<styleUrl>#icon</styleUrl>
<Point>
<coordinates>
-110.3333,37.1222
</coordinates>
</Point>
</Placemark>
<Placemark>
<name>
            </name>
<styleUrl>#icon</styleUrl>
<Point>
<coordinates>
-110.3333,36.5667
</coordinates>
</Point>
</Placemark>
<Placemark>
<name>
            </name>
<styleUrl>#icon</styleUrl>
<Point>
<coordinates>
-110.3333,36.0111
</coordinates>
</Point>
</Placemark>
<Placemark>
<name>
            </name>
<styleUrl>#icon</styleUrl>
<Point>
<coordinates>
-110.3333,35.4556
</coordinates>
</Point>
</Placemark>
<Placemark>
<name>
            </name>
<styleUrl>#icon</styleUrl>
<Point>
<coordinates>
-110.3333,34.9
</coordinates>
</Point>
</Placemark>
<Placemark>
<name>
            </name>
<styleUrl>#icon</styleUrl>
<Point>
<coordinates>
-110.3333,34.3444
</coordinates>
</Point>
</Placemark>
<Placemark>
<name>
            </name>
<styleUrl>#icon</styleUrl>
<Point>
<coordinates>
-110.3333,33.7889
</coordinates>
</Point>
</Placemark>
<Placemark>
<name>
            </name>
<styleUrl>#icon</styleUrl>
<Point>
<coordinates>
-110.3333,33.2333
</coordinates>
</Point>
</Placemark>
<Placemark>
<name>
            </name>
<styleUrl>#icon</styleUrl>
<Point>
<coordinates>
-110.3333,32.6778
</coordinates>
</Point>
</Placemark>
<Placemark>
<name>
            </name>
<styleUrl>#icon</styleUrl>
<Point>
<coordinates>
-110.3333,32.1222
</coordinates>
</Point>
</Placemark>
<Placemark>
<name>
            </name>
<styleUrl>#icon</styleUrl>
<Point>
<coordinates>
-110.3333,31.5667
</coordinates>
</Point>
</Placemark>
<Placemark>
<name>
            </name>
<styleUrl>#icon</styleUrl>
<Point>
<coordinates>
-110.3333,31.0111
</coordinates>
</Point>
</Placemark>
<Placemark>
<name>
            </name>
<styleUrl>#icon</styleUrl>
<Point>
<coordinates>
-110.3333,30.4556
</coordinates>
</Point>
</Placemark>
<Placemark>
<name>
            </name>
<styleUrl>#icon</styleUrl>
<Point>
<coordinates>
-110.3333,29.9
</coordinates>
</Point>
</Placemark>
<Placemark>
<name>
            </name>
<styleUrl>#icon</styleUrl>
<Point>
<coordinates>
-110.3333,29.3444
</coordinates>
</Point>
</Placemark>
<Placemark>
<name>
            </name>
<styleUrl>#icon</styleUrl>
<Point>
<coordinates>
-110.3333,28.7889
</coordinates>
</Point>
</Placemark>
<Placemark>
<name>
            </name>
<styleUrl>#icon</styleUrl>
<Point>
<coordinates>
-110.3333,28.2333
</coordinates>
</Point>
</Placemark>
<Placemark>
<name>
            </name>
<styleUrl>#icon</styleUrl>
<Point>
<coordinates>
-110.3333,27.6778
</coordinates>
</Point>
</Placemark>
<Placemark>
<name>
            </name>
<styleUrl>#icon</styleUrl>
<Point>
<coordinates>
-110.3333,24.3444
</coordinates>
</Point>
</Placemark>
<Placemark>
<name>
            </name>
<styleUrl>#icon</styleUrl>
<Point>
<coordinates>
-110.3333,23.7889
</coordinates>
</Point>
</Placemark>
<Placemark>
<name>
            </name>
<styleUrl>#icon</styleUrl>
<Point>
<coordinates>
-109.5,51.5667
</coordinates>
</Point>
</Placemark>
<Placemark>
<name>
            </name>
<styleUrl>#icon</styleUrl>
<Point>
<coordinates>
-109.5,51.0111
</coordinates>
</Point>
</Placemark>
<Placemark>
<name>
            </name>
<styleUrl>#icon</styleUrl>
<Point>
<coordinates>
-109.5,50.4556
</coordinates>
</Point>
</Placemark>
<Placemark>
<name>
            </name>
<styleUrl>#icon</styleUrl>
<Point>
<coordinates>
-109.5,49.9
</coordinates>
</Point>
</Placemark>
<Placemark>
<name>
            </name>
<styleUrl>#icon</styleUrl>
<Point>
<coordinates>
-109.5,49.3444
</coordinates>
</Point>
</Placemark>
<Placemark>
<name>
            </name>
<styleUrl>#icon</styleUrl>
<Point>
<coordinates>
-109.5,48.7889
</coordinates>
</Point>
</Placemark>
<Placemark>
<name>
            </name>
<styleUrl>#icon</styleUrl>
<Point>
<coordinates>
-109.5,48.2333
</coordinates>
</Point>
</Placemark>
<Placemark>
<name>
            </name>
<styleUrl>#icon</styleUrl>
<Point>
<coordinates>
-109.5,47.6778
</coordinates>
</Point>
</Placemark>
<Placemark>
<name>
            </name>
<styleUrl>#icon</styleUrl>
<Point>
<coordinates>
-109.5,47.1222
</coordinates>
</Point>
</Placemark>
<Placemark>
<name>
            </name>
<styleUrl>#icon</styleUrl>
<Point>
<coordinates>
-109.5,46.5667
</coordinates>
</Point>
</Placemark>
<Placemark>
<name>
            </name>
<styleUrl>#icon</styleUrl>
<Point>
<coordinates>
-109.5,46.0111
</coordinates>
</Point>
</Placemark>
<Placemark>
<name>
            </name>
<styleUrl>#icon</styleUrl>
<Point>
<coordinates>
-109.5,42.6778
</coordinates>
</Point>
</Placemark>
<Placemark>
<name>
            </name>
<styleUrl>#icon</styleUrl>
<Point>
<coordinates>
-109.5,42.1222
</coordinates>
</Point>
</Placemark>
<Placemark>
<name>
            </name>
<styleUrl>#icon</styleUrl>
<Point>
<coordinates>
-109.5,41.5667
</coordinates>
</Point>
</Placemark>
<Placemark>
<name>
            </name>
<styleUrl>#icon</styleUrl>
<Point>
<coordinates>
-109.5,41.0111
</coordinates>
</Point>
</Placemark>
<Placemark>
<name>
            </name>
<styleUrl>#icon</styleUrl>
<Point>
<coordinates>
-109.5,40.4556
</coordinates>
</Point>
</Placemark>
<Placemark>
<name>
            </name>
<styleUrl>#icon</styleUrl>
<Point>
<coordinates>
-109.5,39.9
</coordinates>
</Point>
</Placemark>
<Placemark>
<name>
            </name>
<styleUrl>#icon</styleUrl>
<Point>
<coordinates>
-109.5,39.3444
</coordinates>
</Point>
</Placemark>
<Placemark>
<name>
            </name>
<styleUrl>#icon</styleUrl>
<Point>
<coordinates>
-109.5,38.7889
</coordinates>
</Point>
</Placemark>
<Placemark>
<name>
            </name>
<styleUrl>#icon</styleUrl>
<Point>
<coordinates>
-109.5,38.2333
</coordinates>
</Point>
</Placemark>
<Placemark>
<name>
            </name>
<styleUrl>#icon</styleUrl>
<Point>
<coordinates>
-109.5,37.6778
</coordinates>
</Point>
</Placemark>
<Placemark>
<name>
            </name>
<styleUrl>#icon</styleUrl>
<Point>
<coordinates>
-109.5,37.1222
</coordinates>
</Point>
</Placemark>
<Placemark>
<name>
            </name>
<styleUrl>#icon</styleUrl>
<Point>
<coordinates>
-109.5,36.5667
</coordinates>
</Point>
</Placemark>
<Placemark>
<name>
            </name>
<styleUrl>#icon</styleUrl>
<Point>
<coordinates>
-109.5,36.0111
</coordinates>
</Point>
</Placemark>
<Placemark>
<name>
            </name>
<styleUrl>#icon</styleUrl>
<Point>
<coordinates>
-109.5,35.4556
</coordinates>
</Point>
</Placemark>
<Placemark>
<name>
            </name>
<styleUrl>#icon</styleUrl>
<Point>
<coordinates>
-109.5,34.9
</coordinates>
</Point>
</Placemark>
<Placemark>
<name>
            </name>
<styleUrl>#icon</styleUrl>
<Point>
<coordinates>
-109.5,34.3444
</coordinates>
</Point>
</Placemark>
<Placemark>
<name>
            </name>
<styleUrl>#icon</styleUrl>
<Point>
<coordinates>
-109.5,33.2333
</coordinates>
</Point>
</Placemark>
<Placemark>
<name>
            </name>
<styleUrl>#icon</styleUrl>
<Point>
<coordinates>
-109.5,32.6778
</coordinates>
</Point>
</Placemark>
<Placemark>
<name>
            </name>
<styleUrl>#icon</styleUrl>
<Point>
<coordinates>
-109.5,32.1222
</coordinates>
</Point>
</Placemark>
<Placemark>
<name>
            </name>
<styleUrl>#icon</styleUrl>
<Point>
<coordinates>
-109.5,31.5667
</coordinates>
</Point>
</Placemark>
<Placemark>
<name>
            </name>
<styleUrl>#icon</styleUrl>
<Point>
<coordinates>
-109.5,31.0111
</coordinates>
</Point>
</Placemark>
<Placemark>
<name>
            </name>
<styleUrl>#icon</styleUrl>
<Point>
<coordinates>
-109.5,30.4556
</coordinates>
</Point>
</Placemark>
<Placemark>
<name>
            </name>
<styleUrl>#icon</styleUrl>
<Point>
<coordinates>
-109.5,29.9
</coordinates>
</Point>
</Placemark>
<Placemark>
<name>
            </name>
<styleUrl>#icon</styleUrl>
<Point>
<coordinates>
-109.5,29.3444
</coordinates>
</Point>
</Placemark>
<Placemark>
<name>
            </name>
<styleUrl>#icon</styleUrl>
<Point>
<coordinates>
-109.5,28.7889
</coordinates>
</Point>
</Placemark>
<Placemark>
<name>
            </name>
<styleUrl>#icon</styleUrl>
<Point>
<coordinates>
-109.5,28.2333
</coordinates>
</Point>
</Placemark>
<Placemark>
<name>
            </name>
<styleUrl>#icon</styleUrl>
<Point>
<coordinates>
-109.5,27.6778
</coordinates>
</Point>
</Placemark>
<Placemark>
<name>
            </name>
<styleUrl>#icon</styleUrl>
<Point>
<coordinates>
-109.5,27.1222
</coordinates>
</Point>
</Placemark>
<Placemark>
<name>
            </name>
<styleUrl>#icon</styleUrl>
<Point>
<coordinates>
-109.5,23.7889
</coordinates>
</Point>
</Placemark>
<Placemark>
<name>
            </name>
<styleUrl>#icon</styleUrl>
<Point>
<coordinates>
-108.6667,51.5667
</coordinates>
</Point>
</Placemark>
<Placemark>
<name>
            </name>
<styleUrl>#icon</styleUrl>
<Point>
<coordinates>
-108.6667,51.0111
</coordinates>
</Point>
</Placemark>
<Placemark>
<name>
            </name>
<styleUrl>#icon</styleUrl>
<Point>
<coordinates>
-108.6667,50.4556
</coordinates>
</Point>
</Placemark>
<Placemark>
<name>
            </name>
<styleUrl>#icon</styleUrl>
<Point>
<coordinates>
-108.6667,49.3444
</coordinates>
</Point>
</Placemark>
<Placemark>
<name>
            </name>
<styleUrl>#icon</styleUrl>
<Point>
<coordinates>
-108.6667,48.7889
</coordinates>
</Point>
</Placemark>
<Placemark>
<name>
            </name>
<styleUrl>#icon</styleUrl>
<Point>
<coordinates>
-108.6667,48.2333
</coordinates>
</Point>
</Placemark>
<Placemark>
<name>
            </name>
<styleUrl>#icon</styleUrl>
<Point>
<coordinates>
-108.6667,47.6778
</coordinates>
</Point>
</Placemark>
<Placemark>
<name>
            </name>
<styleUrl>#icon</styleUrl>
<Point>
<coordinates>
-108.6667,47.1222
</coordinates>
</Point>
</Placemark>
<Placemark>
<name>
            </name>
<styleUrl>#icon</styleUrl>
<Point>
<coordinates>
-108.6667,46.5667
</coordinates>
</Point>
</Placemark>
<Placemark>
<name>
            </name>
<styleUrl>#icon</styleUrl>
<Point>
<coordinates>
-108.6667,46.0111
</coordinates>
</Point>
</Placemark>
<Placemark>
<name>
            </name>
<styleUrl>#icon</styleUrl>
<Point>
<coordinates>
-108.6667,45.4556
</coordinates>
</Point>
</Placemark>
<Placemark>
<name>
            </name>
<styleUrl>#icon</styleUrl>
<Point>
<coordinates>
-108.6667,44.9
</coordinates>
</Point>
</Placemark>
<Placemark>
<name>
            </name>
<styleUrl>#icon</styleUrl>
<Point>
<coordinates>
-108.6667,44.3444
</coordinates>
</Point>
</Placemark>
<Placemark>
<name>
            </name>
<styleUrl>#icon</styleUrl>
<Point>
<coordinates>
-108.6667,43.7889
</coordinates>
</Point>
</Placemark>
<Placemark>
<name>
            </name>
<styleUrl>#icon</styleUrl>
<Point>
<coordinates>
-108.6667,43.2333
</coordinates>
</Point>
</Placemark>
<Placemark>
<name>
            </name>
<styleUrl>#icon</styleUrl>
<Point>
<coordinates>
-108.6667,42.6778
</coordinates>
</Point>
</Placemark>
<Placemark>
<name>
            </name>
<styleUrl>#icon</styleUrl>
<Point>
<coordinates>
-108.6667,42.1222
</coordinates>
</Point>
</Placemark>
<Placemark>
<name>
            </name>
<styleUrl>#icon</styleUrl>
<Point>
<coordinates>
-108.6667,41.5667
</coordinates>
</Point>
</Placemark>
<Placemark>
<name>
            </name>
<styleUrl>#icon</styleUrl>
<Point>
<coordinates>
-108.6667,41.0111
</coordinates>
</Point>
</Placemark>
<Placemark>
<name>
            </name>
<styleUrl>#icon</styleUrl>
<Point>
<coordinates>
-108.6667,40.4556
</coordinates>
</Point>
</Placemark>
<Placemark>
<name>
            </name>
<styleUrl>#icon</styleUrl>
<Point>
<coordinates>
-108.6667,39.9
</coordinates>
</Point>
</Placemark>
<Placemark>
<name>
            </name>
<styleUrl>#icon</styleUrl>
<Point>
<coordinates>
-108.6667,39.3444
</coordinates>
</Point>
</Placemark>
<Placemark>
<name>
            </name>
<styleUrl>#icon</styleUrl>
<Point>
<coordinates>
-108.6667,38.7889
</coordinates>
</Point>
</Placemark>
<Placemark>
<name>
            </name>
<styleUrl>#icon</styleUrl>
<Point>
<coordinates>
-108.6667,38.2333
</coordinates>
</Point>
</Placemark>
<Placemark>
<name>
            </name>
<styleUrl>#icon</styleUrl>
<Point>
<coordinates>
-108.6667,37.6778
</coordinates>
</Point>
</Placemark>
<Placemark>
<name>
            </name>
<styleUrl>#icon</styleUrl>
<Point>
<coordinates>
-108.6667,37.1222
</coordinates>
</Point>
</Placemark>
<Placemark>
<name>
            </name>
<styleUrl>#icon</styleUrl>
<Point>
<coordinates>
-108.6667,36.5667
</coordinates>
</Point>
</Placemark>
<Placemark>
<name>
            </name>
<styleUrl>#icon</styleUrl>
<Point>
<coordinates>
-108.6667,36.0111
</coordinates>
</Point>
</Placemark>
<Placemark>
<name>
            </name>
<styleUrl>#icon</styleUrl>
<Point>
<coordinates>
-108.6667,35.4556
</coordinates>
</Point>
</Placemark>
<Placemark>
<name>
            </name>
<styleUrl>#icon</styleUrl>
<Point>
<coordinates>
-108.6667,34.9
</coordinates>
</Point>
</Placemark>
<Placemark>
<name>
            </name>
<styleUrl>#icon</styleUrl>
<Point>
<coordinates>
-108.6667,34.3444
</coordinates>
</Point>
</Placemark>
<Placemark>
<name>
            </name>
<styleUrl>#icon</styleUrl>
<Point>
<coordinates>
-108.6667,33.7889
</coordinates>
</Point>
</Placemark>
<Placemark>
<name>
            </name>
<styleUrl>#icon</styleUrl>
<Point>
<coordinates>
-108.6667,33.2333
</coordinates>
</Point>
</Placemark>
<Placemark>
<name>
            </name>
<styleUrl>#icon</styleUrl>
<Point>
<coordinates>
-108.6667,32.6778
</coordinates>
</Point>
</Placemark>
<Placemark>
<name>
            </name>
<styleUrl>#icon</styleUrl>
<Point>
<coordinates>
-108.6667,32.1222
</coordinates>
</Point>
</Placemark>
<Placemark>
<name>
            </name>
<styleUrl>#icon</styleUrl>
<Point>
<coordinates>
-108.6667,31.5667
</coordinates>
</Point>
</Placemark>
<Placemark>
<name>
            </name>
<styleUrl>#icon</styleUrl>
<Point>
<coordinates>
-108.6667,31.0111
</coordinates>
</Point>
</Placemark>
<Placemark>
<name>
            </name>
<styleUrl>#icon</styleUrl>
<Point>
<coordinates>
-108.6667,30.4556
</coordinates>
</Point>
</Placemark>
<Placemark>
<name>
            </name>
<styleUrl>#icon</styleUrl>
<Point>
<coordinates>
-108.6667,29.3444
</coordinates>
</Point>
</Placemark>
<Placemark>
<name>
            </name>
<styleUrl>#icon</styleUrl>
<Point>
<coordinates>
-108.6667,27.6778
</coordinates>
</Point>
</Placemark>
<Placemark>
<name>
            </name>
<styleUrl>#icon</styleUrl>
<Point>
<coordinates>
-108.6667,27.1222
</coordinates>
</Point>
</Placemark>
<Placemark>
<name>
            </name>
<styleUrl>#icon</styleUrl>
<Point>
<coordinates>
-108.6667,26.5667
</coordinates>
</Point>
</Placemark>
<Placemark>
<name>
            </name>
<styleUrl>#icon</styleUrl>
<Point>
<coordinates>
-108.6667,26.0111
</coordinates>
</Point>
</Placemark>
<Placemark>
<name>
            </name>
<styleUrl>#icon</styleUrl>
<Point>
<coordinates>
-107.8333,51.5667
</coordinates>
</Point>
</Placemark>
<Placemark>
<name>
            </name>
<styleUrl>#icon</styleUrl>
<Point>
<coordinates>
-107.8333,51.0111
</coordinates>
</Point>
</Placemark>
<Placemark>
<name>
            </name>
<styleUrl>#icon</styleUrl>
<Point>
<coordinates>
-107.8333,49.9
</coordinates>
</Point>
</Placemark>
<Placemark>
<name>
            </name>
<styleUrl>#icon</styleUrl>
<Point>
<coordinates>
-107.8333,49.3444
</coordinates>
</Point>
</Placemark>
<Placemark>
<name>
            </name>
<styleUrl>#icon</styleUrl>
<Point>
<coordinates>
-107.8333,48.7889
</coordinates>
</Point>
</Placemark>
<Placemark>
<name>
            </name>
<styleUrl>#icon</styleUrl>
<Point>
<coordinates>
-107.8333,48.2333
</coordinates>
</Point>
</Placemark>
<Placemark>
<name>
            </name>
<styleUrl>#icon</styleUrl>
<Point>
<coordinates>
-107.8333,47.6778
</coordinates>
</Point>
</Placemark>
<Placemark>
<name>
            </name>
<styleUrl>#icon</styleUrl>
<Point>
<coordinates>
-107.8333,47.1222
</coordinates>
</Point>
</Placemark>
<Placemark>
<name>
            </name>
<styleUrl>#icon</styleUrl>
<Point>
<coordinates>
-107.8333,46.5667
</coordinates>
</Point>
</Placemark>
<Placemark>
<name>
            </name>
<styleUrl>#icon</styleUrl>
<Point>
<coordinates>
-107.8333,46.0111
</coordinates>
</Point>
</Placemark>
<Placemark>
<name>
            </name>
<styleUrl>#icon</styleUrl>
<Point>
<coordinates>
-107.8333,45.4556
</coordinates>
</Point>
</Placemark>
<Placemark>
<name>
            </name>
<styleUrl>#icon</styleUrl>
<Point>
<coordinates>
-107.8333,44.3444
</coordinates>
</Point>
</Placemark>
<Placemark>
<name>
            </name>
<styleUrl>#icon</styleUrl>
<Point>
<coordinates>
-107.8333,43.7889
</coordinates>
</Point>
</Placemark>
<Placemark>
<name>
            </name>
<styleUrl>#icon</styleUrl>
<Point>
<coordinates>
-107.8333,43.2333
</coordinates>
</Point>
</Placemark>
<Placemark>
<name>
            </name>
<styleUrl>#icon</styleUrl>
<Point>
<coordinates>
-107.8333,42.6778
</coordinates>
</Point>
</Placemark>
<Placemark>
<name>
            </name>
<styleUrl>#icon</styleUrl>
<Point>
<coordinates>
-107.8333,42.1222
</coordinates>
</Point>
</Placemark>
<Placemark>
<name>
            </name>
<styleUrl>#icon</styleUrl>
<Point>
<coordinates>
-107.8333,41.5667
</coordinates>
</Point>
</Placemark>
<Placemark>
<name>
            </name>
<styleUrl>#icon</styleUrl>
<Point>
<coordinates>
-107.8333,41.0111
</coordinates>
</Point>
</Placemark>
<Placemark>
<name>
            </name>
<styleUrl>#icon</styleUrl>
<Point>
<coordinates>
-107.8333,38.7889
</coordinates>
</Point>
</Placemark>
<Placemark>
<name>
            </name>
<styleUrl>#icon</styleUrl>
<Point>
<coordinates>
-107.8333,38.2333
</coordinates>
</Point>
</Placemark>
<Placemark>
<name>
            </name>
<styleUrl>#icon</styleUrl>
<Point>
<coordinates>
-107.8333,37.1222
</coordinates>
</Point>
</Placemark>
<Placemark>
<name>
            </name>
<styleUrl>#icon</styleUrl>
<Point>
<coordinates>
-107.8333,36.5667
</coordinates>
</Point>
</Placemark>
<Placemark>
<name>
            </name>
<styleUrl>#icon</styleUrl>
<Point>
<coordinates>
-107.8333,36.0111
</coordinates>
</Point>
</Placemark>
<Placemark>
<name>
            </name>
<styleUrl>#icon</styleUrl>
<Point>
<coordinates>
-107.8333,35.4556
</coordinates>
</Point>
</Placemark>
<Placemark>
<name>
            </name>
<styleUrl>#icon</styleUrl>
<Point>
<coordinates>
-107.8333,34.9
</coordinates>
</Point>
</Placemark>
<Placemark>
<name>
            </name>
<styleUrl>#icon</styleUrl>
<Point>
<coordinates>
-107.8333,34.3444
</coordinates>
</Point>
</Placemark>
<Placemark>
<name>
            </name>
<styleUrl>#icon</styleUrl>
<Point>
<coordinates>
-107.8333,33.7889
</coordinates>
</Point>
</Placemark>
<Placemark>
<name>
            </name>
<styleUrl>#icon</styleUrl>
<Point>
<coordinates>
-107.8333,33.2333
</coordinates>
</Point>
</Placemark>
<Placemark>
<name>
            </name>
<styleUrl>#icon</styleUrl>
<Point>
<coordinates>
-107.8333,32.6778
</coordinates>
</Point>
</Placemark>
<Placemark>
<name>
            </name>
<styleUrl>#icon</styleUrl>
<Point>
<coordinates>
-107.8333,32.1222
</coordinates>
</Point>
</Placemark>
<Placemark>
<name>
            </name>
<styleUrl>#icon</styleUrl>
<Point>
<coordinates>
-107.8333,31.5667
</coordinates>
</Point>
</Placemark>
<Placemark>
<name>
            </name>
<styleUrl>#icon</styleUrl>
<Point>
<coordinates>
-107.8333,31.0111
</coordinates>
</Point>
</Placemark>
<Placemark>
<name>
            </name>
<styleUrl>#icon</styleUrl>
<Point>
<coordinates>
-107.8333,30.4556
</coordinates>
</Point>
</Placemark>
<Placemark>
<name>
            </name>
<styleUrl>#icon</styleUrl>
<Point>
<coordinates>
-107.8333,29.9
</coordinates>
</Point>
</Placemark>
<Placemark>
<name>
            </name>
<styleUrl>#icon</styleUrl>
<Point>
<coordinates>
-107.8333,29.3444
</coordinates>
</Point>
</Placemark>
<Placemark>
<name>
            </name>
<styleUrl>#icon</styleUrl>
<Point>
<coordinates>
-107.8333,28.7889
</coordinates>
</Point>
</Placemark>
<Placemark>
<name>
            </name>
<styleUrl>#icon</styleUrl>
<Point>
<coordinates>
-107.8333,25.4556
</coordinates>
</Point>
</Placemark>
<Placemark>
<name>
            </name>
<styleUrl>#icon</styleUrl>
<Point>
<coordinates>
-107.8333,24.9
</coordinates>
</Point>
</Placemark>
<Placemark>
<name>
            </name>
<styleUrl>#icon</styleUrl>
<Point>
<coordinates>
-107,51.0111
</coordinates>
</Point>
</Placemark>
<Placemark>
<name>
            </name>
<styleUrl>#icon</styleUrl>
<Point>
<coordinates>
-107,50.4556
</coordinates>
</Point>
</Placemark>
<Placemark>
<name>
            </name>
<styleUrl>#icon</styleUrl>
<Point>
<coordinates>
-107,49.9
</coordinates>
</Point>
</Placemark>
<Placemark>
<name>
            </name>
<styleUrl>#icon</styleUrl>
<Point>
<coordinates>
-107,49.3444
</coordinates>
</Point>
</Placemark>
<Placemark>
<name>
            </name>
<styleUrl>#icon</styleUrl>
<Point>
<coordinates>
-107,48.7889
</coordinates>
</Point>
</Placemark>
<Placemark>
<name>
            </name>
<styleUrl>#icon</styleUrl>
<Point>
<coordinates>
-107,48.2333
</coordinates>
</Point>
</Placemark>
<Placemark>
<name>
            </name>
<styleUrl>#icon</styleUrl>
<Point>
<coordinates>
-107,47.6778
</coordinates>
</Point>
</Placemark>
<Placemark>
<name>
            </name>
<styleUrl>#icon</styleUrl>
<Point>
<coordinates>
-107,47.1222
</coordinates>
</Point>
</Placemark>
<Placemark>
<name>
            </name>
<styleUrl>#icon</styleUrl>
<Point>
<coordinates>
-107,46.5667
</coordinates>
</Point>
</Placemark>
<Placemark>
<name>
            </name>
<styleUrl>#icon</styleUrl>
<Point>
<coordinates>
-107,46.0111
</coordinates>
</Point>
</Placemark>
<Placemark>
<name>
            </name>
<styleUrl>#icon</styleUrl>
<Point>
<coordinates>
-107,45.4556
</coordinates>
</Point>
</Placemark>
<Placemark>
<name>
            </name>
<styleUrl>#icon</styleUrl>
<Point>
<coordinates>
-107,43.7889
</coordinates>
</Point>
</Placemark>
<Placemark>
<name>
            </name>
<styleUrl>#icon</styleUrl>
<Point>
<coordinates>
-107,43.2333
</coordinates>
</Point>
</Placemark>
<Placemark>
<name>
            </name>
<styleUrl>#icon</styleUrl>
<Point>
<coordinates>
-107,42.6778
</coordinates>
</Point>
</Placemark>
<Placemark>
<name>
            </name>
<styleUrl>#icon</styleUrl>
<Point>
<coordinates>
-107,42.1222
</coordinates>
</Point>
</Placemark>
<Placemark>
<name>
            </name>
<styleUrl>#icon</styleUrl>
<Point>
<coordinates>
-107,41.5667
</coordinates>
</Point>
</Placemark>
<Placemark>
<name>
            </name>
<styleUrl>#icon</styleUrl>
<Point>
<coordinates>
-107,37.1222
</coordinates>
</Point>
</Placemark>
<Placemark>
<name>
            </name>
<styleUrl>#icon</styleUrl>
<Point>
<coordinates>
-107,36.5667
</coordinates>
</Point>
</Placemark>
<Placemark>
<name>
            </name>
<styleUrl>#icon</styleUrl>
<Point>
<coordinates>
-107,36.0111
</coordinates>
</Point>
</Placemark>
<Placemark>
<name>
            </name>
<styleUrl>#icon</styleUrl>
<Point>
<coordinates>
-107,35.4556
</coordinates>
</Point>
</Placemark>
<Placemark>
<name>
            </name>
<styleUrl>#icon</styleUrl>
<Point>
<coordinates>
-107,34.9
</coordinates>
</Point>
</Placemark>
<Placemark>
<name>
            </name>
<styleUrl>#icon</styleUrl>
<Point>
<coordinates>
-107,34.3444
</coordinates>
</Point>
</Placemark>
<Placemark>
<name>
            </name>
<styleUrl>#icon</styleUrl>
<Point>
<coordinates>
-107,33.7889
</coordinates>
</Point>
</Placemark>
<Placemark>
<name>
            </name>
<styleUrl>#icon</styleUrl>
<Point>
<coordinates>
-107,33.2333
</coordinates>
</Point>
</Placemark>
<Placemark>
<name>
            </name>
<styleUrl>#icon</styleUrl>
<Point>
<coordinates>
-107,32.6778
</coordinates>
</Point>
</Placemark>
<Placemark>
<name>
            </name>
<styleUrl>#icon</styleUrl>
<Point>
<coordinates>
-107,32.1222
</coordinates>
</Point>
</Placemark>
<Placemark>
<name>
            </name>
<styleUrl>#icon</styleUrl>
<Point>
<coordinates>
-107,31.5667
</coordinates>
</Point>
</Placemark>
<Placemark>
<name>
            </name>
<styleUrl>#icon</styleUrl>
<Point>
<coordinates>
-107,31.0111
</coordinates>
</Point>
</Placemark>
<Placemark>
<name>
            </name>
<styleUrl>#icon</styleUrl>
<Point>
<coordinates>
-107,30.4556
</coordinates>
</Point>
</Placemark>
<Placemark>
<name>
            </name>
<styleUrl>#icon</styleUrl>
<Point>
<coordinates>
-107,29.9
</coordinates>
</Point>
</Placemark>
<Placemark>
<name>
            </name>
<styleUrl>#icon</styleUrl>
<Point>
<coordinates>
-107,29.3444
</coordinates>
</Point>
</Placemark>
<Placemark>
<name>
            </name>
<styleUrl>#icon</styleUrl>
<Point>
<coordinates>
-107,28.7889
</coordinates>
</Point>
</Placemark>
<Placemark>
<name>
            </name>
<styleUrl>#icon</styleUrl>
<Point>
<coordinates>
-107,28.2333
</coordinates>
</Point>
</Placemark>
<Placemark>
<name>
            </name>
<styleUrl>#icon</styleUrl>
<Point>
<coordinates>
-107,24.3444
</coordinates>
</Point>
</Placemark>
<Placemark>
<name>
            </name>
<styleUrl>#icon</styleUrl>
<Point>
<coordinates>
-106.1667,49.9
</coordinates>
</Point>
</Placemark>
<Placemark>
<name>
            </name>
<styleUrl>#icon</styleUrl>
<Point>
<coordinates>
-106.1667,49.3444
</coordinates>
</Point>
</Placemark>
<Placemark>
<name>
            </name>
<styleUrl>#icon</styleUrl>
<Point>
<coordinates>
-106.1667,48.7889
</coordinates>
</Point>
</Placemark>
<Placemark>
<name>
            </name>
<styleUrl>#icon</styleUrl>
<Point>
<coordinates>
-106.1667,48.2333
</coordinates>
</Point>
</Placemark>
<Placemark>
<name>
            </name>
<styleUrl>#icon</styleUrl>
<Point>
<coordinates>
-106.1667,47.6778
</coordinates>
</Point>
</Placemark>
<Placemark>
<name>
            </name>
<styleUrl>#icon</styleUrl>
<Point>
<coordinates>
-106.1667,47.1222
</coordinates>
</Point>
</Placemark>
<Placemark>
<name>
            </name>
<styleUrl>#icon</styleUrl>
<Point>
<coordinates>
-106.1667,46.5667
</coordinates>
</Point>
</Placemark>
<Placemark>
<name>
            </name>
<styleUrl>#icon</styleUrl>
<Point>
<coordinates>
-106.1667,46.0111
</coordinates>
</Point>
</Placemark>
<Placemark>
<name>
            </name>
<styleUrl>#icon</styleUrl>
<Point>
<coordinates>
-106.1667,45.4556
</coordinates>
</Point>
</Placemark>
<Placemark>
<name>
            </name>
<styleUrl>#icon</styleUrl>
<Point>
<coordinates>
-106.1667,44.9
</coordinates>
</Point>
</Placemark>
<Placemark>
<name>
            </name>
<styleUrl>#icon</styleUrl>
<Point>
<coordinates>
-106.1667,44.3444
</coordinates>
</Point>
</Placemark>
<Placemark>
<name>
            </name>
<styleUrl>#icon</styleUrl>
<Point>
<coordinates>
-106.1667,43.7889
</coordinates>
</Point>
</Placemark>
<Placemark>
<name>
            </name>
<styleUrl>#icon</styleUrl>
<Point>
<coordinates>
-106.1667,43.2333
</coordinates>
</Point>
</Placemark>
<Placemark>
<name>
            </name>
<styleUrl>#icon</styleUrl>
<Point>
<coordinates>
-106.1667,42.6778
</coordinates>
</Point>
</Placemark>
<Placemark>
<name>
            </name>
<styleUrl>#icon</styleUrl>
<Point>
<coordinates>
-106.1667,42.1222
</coordinates>
</Point>
</Placemark>
<Placemark>
<name>
            </name>
<styleUrl>#icon</styleUrl>
<Point>
<coordinates>
-106.1667,37.6778
</coordinates>
</Point>
</Placemark>
<Placemark>
<name>
            </name>
<styleUrl>#icon</styleUrl>
<Point>
<coordinates>
-106.1667,36.5667
</coordinates>
</Point>
</Placemark>
<Placemark>
<name>
            </name>
<styleUrl>#icon</styleUrl>
<Point>
<coordinates>
-106.1667,36.0111
</coordinates>
</Point>
</Placemark>
<Placemark>
<name>
            </name>
<styleUrl>#icon</styleUrl>
<Point>
<coordinates>
-106.1667,35.4556
</coordinates>
</Point>
</Placemark>
<Placemark>
<name>
            </name>
<styleUrl>#icon</styleUrl>
<Point>
<coordinates>
-106.1667,34.9
</coordinates>
</Point>
</Placemark>
<Placemark>
<name>
            </name>
<styleUrl>#icon</styleUrl>
<Point>
<coordinates>
-106.1667,34.3444
</coordinates>
</Point>
</Placemark>
<Placemark>
<name>
            </name>
<styleUrl>#icon</styleUrl>
<Point>
<coordinates>
-106.1667,33.7889
</coordinates>
</Point>
</Placemark>
<Placemark>
<name>
B (sparse)    T (sparse)        </name>
<styleUrl>#icon</styleUrl>
<Point>
<coordinates>
-106.1667,33.2333
</coordinates>
</Point>
</Placemark>
<Placemark>
<name>
B (local)    T (local)        </name>
<styleUrl>#icon</styleUrl>
<Point>
<coordinates>
-106.1667,32.6778
</coordinates>
</Point>
</Placemark>
<Placemark>
<name>
            </name>
<styleUrl>#icon</styleUrl>
<Point>
<coordinates>
-106.1667,32.1222
</coordinates>
</Point>
</Placemark>
<Placemark>
<name>
    T (sparse)        S (local)</name>
<styleUrl>#icon</styleUrl>
<Point>
<coordinates>
-106.1667,31.5667
</coordinates>
</Point>
</Placemark>
<Placemark>
<name>
            </name>
<styleUrl>#icon</styleUrl>
<Point>
<coordinates>
-106.1667,31.0111
</coordinates>
</Point>
</Placemark>
<Placemark>
<name>
            </name>
<styleUrl>#icon</styleUrl>
<Point>
<coordinates>
-106.1667,30.4556
</coordinates>
</Point>
</Placemark>
<Placemark>
<name>
            </name>
<styleUrl>#icon</styleUrl>
<Point>
<coordinates>
-106.1667,29.9
</coordinates>
</Point>
</Placemark>
<Placemark>
<name>
            </name>
<styleUrl>#icon</styleUrl>
<Point>
<coordinates>
-106.1667,29.3444
</coordinates>
</Point>
</Placemark>
<Placemark>
<name>
            </name>
<styleUrl>#icon</styleUrl>
<Point>
<coordinates>
-106.1667,28.7889
</coordinates>
</Point>
</Placemark>
<Placemark>
<name>
            </name>
<styleUrl>#icon</styleUrl>
<Point>
<coordinates>
-106.1667,28.2333
</coordinates>
</Point>
</Placemark>
<Placemark>
<name>
            </name>
<styleUrl>#icon</styleUrl>
<Point>
<coordinates>
-106.1667,27.6778
</coordinates>
</Point>
</Placemark>
<Placemark>
<name>
            </name>
<styleUrl>#icon</styleUrl>
<Point>
<coordinates>
-106.1667,27.1222
</coordinates>
</Point>
</Placemark>
<Placemark>
<name>
            </name>
<styleUrl>#icon</styleUrl>
<Point>
<coordinates>
-105.3333,49.9
</coordinates>
</Point>
</Placemark>
<Placemark>
<name>
            </name>
<styleUrl>#icon</styleUrl>
<Point>
<coordinates>
-105.3333,49.3444
</coordinates>
</Point>
</Placemark>
<Placemark>
<name>
            </name>
<styleUrl>#icon</styleUrl>
<Point>
<coordinates>
-105.3333,48.7889
</coordinates>
</Point>
</Placemark>
<Placemark>
<name>
            </name>
<styleUrl>#icon</styleUrl>
<Point>
<coordinates>
-105.3333,48.2333
</coordinates>
</Point>
</Placemark>
<Placemark>
<name>
            </name>
<styleUrl>#icon</styleUrl>
<Point>
<coordinates>
-105.3333,47.6778
</coordinates>
</Point>
</Placemark>
<Placemark>
<name>
            </name>
<styleUrl>#icon</styleUrl>
<Point>
<coordinates>
-105.3333,47.1222
</coordinates>
</Point>
</Placemark>
<Placemark>
<name>
            </name>
<styleUrl>#icon</styleUrl>
<Point>
<coordinates>
-105.3333,46.5667
</coordinates>
</Point>
</Placemark>
<Placemark>
<name>
            </name>
<styleUrl>#icon</styleUrl>
<Point>
<coordinates>
-105.3333,46.0111
</coordinates>
</Point>
</Placemark>
<Placemark>
<name>
            </name>
<styleUrl>#icon</styleUrl>
<Point>
<coordinates>
-105.3333,45.4556
</coordinates>
</Point>
</Placemark>
<Placemark>
<name>
            </name>
<styleUrl>#icon</styleUrl>
<Point>
<coordinates>
-105.3333,44.9
</coordinates>
</Point>
</Placemark>
<Placemark>
<name>
            </name>
<styleUrl>#icon</styleUrl>
<Point>
<coordinates>
-105.3333,44.3444
</coordinates>
</Point>
</Placemark>
<Placemark>
<name>
            </name>
<styleUrl>#icon</styleUrl>
<Point>
<coordinates>
-105.3333,43.7889
</coordinates>
</Point>
</Placemark>
<Placemark>
<name>
            </name>
<styleUrl>#icon</styleUrl>
<Point>
<coordinates>
-105.3333,43.2333
</coordinates>
</Point>
</Placemark>
<Placemark>
<name>
            </name>
<styleUrl>#icon</styleUrl>
<Point>
<coordinates>
-105.3333,42.6778
</coordinates>
</Point>
</Placemark>
<Placemark>
<name>
            </name>
<styleUrl>#icon</styleUrl>
<Point>
<coordinates>
-105.3333,42.1222
</coordinates>
</Point>
</Placemark>
<Placemark>
<name>
            </name>
<styleUrl>#icon</styleUrl>
<Point>
<coordinates>
-105.3333,41.5667
</coordinates>
</Point>
</Placemark>
<Placemark>
<name>
            </name>
<styleUrl>#icon</styleUrl>
<Point>
<coordinates>
-105.3333,41.0111
</coordinates>
</Point>
</Placemark>
<Placemark>
<name>
            </name>
<styleUrl>#icon</styleUrl>
<Point>
<coordinates>
-105.3333,40.4556
</coordinates>
</Point>
</Placemark>
<Placemark>
<name>
    T (local)        </name>
<styleUrl>#icon</styleUrl>
<Point>
<coordinates>
-105.3333,38.2333
</coordinates>
</Point>
</Placemark>
<Placemark>
<name>
    T (local)        </name>
<styleUrl>#icon</styleUrl>
<Point>
<coordinates>
-105.3333,37.6778
</coordinates>
</Point>
</Placemark>
<Placemark>
<name>
            </name>
<styleUrl>#icon</styleUrl>
<Point>
<coordinates>
-105.3333,36.0111
</coordinates>
</Point>
</Placemark>
<Placemark>
<name>
            </name>
<styleUrl>#icon</styleUrl>
<Point>
<coordinates>
-105.3333,35.4556
</coordinates>
</Point>
</Placemark>
<Placemark>
<name>
            </name>
<styleUrl>#icon</styleUrl>
<Point>
<coordinates>
-105.3333,34.9
</coordinates>
</Point>
</Placemark>
<Placemark>
<name>
            </name>
<styleUrl>#icon</styleUrl>
<Point>
<coordinates>
-105.3333,34.3444
</coordinates>
</Point>
</Placemark>
<Placemark>
<name>
            </name>
<styleUrl>#icon</styleUrl>
<Point>
<coordinates>
-105.3333,33.7889
</coordinates>
</Point>
</Placemark>
<Placemark>
<name>
            </name>
<styleUrl>#icon</styleUrl>
<Point>
<coordinates>
-105.3333,33.2333
</coordinates>
</Point>
</Placemark>
<Placemark>
<name>
            </name>
<styleUrl>#icon</styleUrl>
<Point>
<coordinates>
-105.3333,32.6778
</coordinates>
</Point>
</Placemark>
<Placemark>
<name>
            </name>
<styleUrl>#icon</styleUrl>
<Point>
<coordinates>
-105.3333,32.1222
</coordinates>
</Point>
</Placemark>
<Placemark>
<name>
            </name>
<styleUrl>#icon</styleUrl>
<Point>
<coordinates>
-105.3333,31.5667
</coordinates>
</Point>
</Placemark>
<Placemark>
<name>
            </name>
<styleUrl>#icon</styleUrl>
<Point>
<coordinates>
-105.3333,31.0111
</coordinates>
</Point>
</Placemark>
<Placemark>
<name>
            </name>
<styleUrl>#icon</styleUrl>
<Point>
<coordinates>
-105.3333,30.4556
</coordinates>
</Point>
</Placemark>
<Placemark>
<name>
            </name>
<styleUrl>#icon</styleUrl>
<Point>
<coordinates>
-105.3333,29.9
</coordinates>
</Point>
</Placemark>
<Placemark>
<name>
            </name>
<styleUrl>#icon</styleUrl>
<Point>
<coordinates>
-105.3333,29.3444
</coordinates>
</Point>
</Placemark>
<Placemark>
<name>
            </name>
<styleUrl>#icon</styleUrl>
<Point>
<coordinates>
-105.3333,28.7889
</coordinates>
</Point>
</Placemark>
<Placemark>
<name>
            </name>
<styleUrl>#icon</styleUrl>
<Point>
<coordinates>
-105.3333,28.2333
</coordinates>
</Point>
</Placemark>
<Placemark>
<name>
            </name>
<styleUrl>#icon</styleUrl>
<Point>
<coordinates>
-105.3333,27.6778
</coordinates>
</Point>
</Placemark>
<Placemark>
<name>
            </name>
<styleUrl>#icon</styleUrl>
<Point>
<coordinates>
-105.3333,27.1222
</coordinates>
</Point>
</Placemark>
<Placemark>
<name>
            </name>
<styleUrl>#icon</styleUrl>
<Point>
<coordinates>
-105.3333,26.5667
</coordinates>
</Point>
</Placemark>
<Placemark>
<name>
            </name>
<styleUrl>#icon</styleUrl>
<Point>
<coordinates>
-105.3333,26.0111
</coordinates>
</Point>
</Placemark>
<Placemark>
<name>
            </name>
<styleUrl>#icon</styleUrl>
<Point>
<coordinates>
-105.3333,25.4556
</coordinates>
</Point>
</Placemark>
<Placemark>
<name>
            </name>
<styleUrl>#icon</styleUrl>
<Point>
<coordinates>
-104.5,49.3444
</coordinates>
</Point>
</Placemark>
<Placemark>
<name>
            </name>
<styleUrl>#icon</styleUrl>
<Point>
<coordinates>
-104.5,48.7889
</coordinates>
</Point>
</Placemark>
<Placemark>
<name>
            </name>
<styleUrl>#icon</styleUrl>
<Point>
<coordinates>
-104.5,48.2333
</coordinates>
</Point>
</Placemark>
<Placemark>
<name>
            </name>
<styleUrl>#icon</styleUrl>
<Point>
<coordinates>
-104.5,47.6778
</coordinates>
</Point>
</Placemark>
<Placemark>
<name>
            </name>
<styleUrl>#icon</styleUrl>
<Point>
<coordinates>
-104.5,47.1222
</coordinates>
</Point>
</Placemark>
<Placemark>
<name>
            </name>
<styleUrl>#icon</styleUrl>
<Point>
<coordinates>
-104.5,46.5667
</coordinates>
</Point>
</Placemark>
<Placemark>
<name>
            </name>
<styleUrl>#icon</styleUrl>
<Point>
<coordinates>
-104.5,46.0111
</coordinates>
</Point>
</Placemark>
<Placemark>
<name>
            </name>
<styleUrl>#icon</styleUrl>
<Point>
<coordinates>
-104.5,45.4556
</coordinates>
</Point>
</Placemark>
<Placemark>
<name>
            </name>
<styleUrl>#icon</styleUrl>
<Point>
<coordinates>
-104.5,44.9
</coordinates>
</Point>
</Placemark>
<Placemark>
<name>
            </name>
<styleUrl>#icon</styleUrl>
<Point>
<coordinates>
-104.5,44.3444
</coordinates>
</Point>
</Placemark>
<Placemark>
<name>
            </name>
<styleUrl>#icon</styleUrl>
<Point>
<coordinates>
-104.5,43.7889
</coordinates>
</Point>
</Placemark>
<Placemark>
<name>
            </name>
<styleUrl>#icon</styleUrl>
<Point>
<coordinates>
-104.5,43.2333
</coordinates>
</Point>
</Placemark>
<Placemark>
<name>
            </name>
<styleUrl>#icon</styleUrl>
<Point>
<coordinates>
-104.5,42.6778
</coordinates>
</Point>
</Placemark>
<Placemark>
<name>
            </name>
<styleUrl>#icon</styleUrl>
<Point>
<coordinates>
-104.5,42.1222
</coordinates>
</Point>
</Placemark>
<Placemark>
<name>
            </name>
<styleUrl>#icon</styleUrl>
<Point>
<coordinates>
-104.5,41.5667
</coordinates>
</Point>
</Placemark>
<Placemark>
<name>
            </name>
<styleUrl>#icon</styleUrl>
<Point>
<coordinates>
-104.5,41.0111
</coordinates>
</Point>
</Placemark>
<Placemark>
<name>
            </name>
<styleUrl>#icon</styleUrl>
<Point>
<coordinates>
-104.5,40.4556
</coordinates>
</Point>
</Placemark>
<Placemark>
<name>
            </name>
<styleUrl>#icon</styleUrl>
<Point>
<coordinates>
-104.5,39.9
</coordinates>
</Point>
</Placemark>
<Placemark>
<name>
            </name>
<styleUrl>#icon</styleUrl>
<Point>
<coordinates>
-104.5,38.7889
</coordinates>
</Point>
</Placemark>
<Placemark>
<name>
            </name>
<styleUrl>#icon</styleUrl>
<Point>
<coordinates>
-104.5,38.2333
</coordinates>
</Point>
</Placemark>
<Placemark>
<name>
            </name>
<styleUrl>#icon</styleUrl>
<Point>
<coordinates>
-104.5,37.6778
</coordinates>
</Point>
</Placemark>
<Placemark>
<name>
            </name>
<styleUrl>#icon</styleUrl>
<Point>
<coordinates>
-104.5,37.1222
</coordinates>
</Point>
</Placemark>
<Placemark>
<name>
            </name>
<styleUrl>#icon</styleUrl>
<Point>
<coordinates>
-104.5,36.5667
</coordinates>
</Point>
</Placemark>
<Placemark>
<name>
            </name>
<styleUrl>#icon</styleUrl>
<Point>
<coordinates>
-104.5,36.0111
</coordinates>
</Point>
</Placemark>
<Placemark>
<name>
            </name>
<styleUrl>#icon</styleUrl>
<Point>
<coordinates>
-104.5,35.4556
</coordinates>
</Point>
</Placemark>
<Placemark>
<name>
            </name>
<styleUrl>#icon</styleUrl>
<Point>
<coordinates>
-104.5,34.9
</coordinates>
</Point>
</Placemark>
<Placemark>
<name>
            </name>
<styleUrl>#icon</styleUrl>
<Point>
<coordinates>
-104.5,34.3444
</coordinates>
</Point>
</Placemark>
<Placemark>
<name>
            </name>
<styleUrl>#icon</styleUrl>
<Point>
<coordinates>
-104.5,33.7889
</coordinates>
</Point>
</Placemark>
<Placemark>
<name>
            </name>
<styleUrl>#icon</styleUrl>
<Point>
<coordinates>
-104.5,33.2333
</coordinates>
</Point>
</Placemark>
<Placemark>
<name>
            </name>
<styleUrl>#icon</styleUrl>
<Point>
<coordinates>
-104.5,32.6778
</coordinates>
</Point>
</Placemark>
<Placemark>
<name>
            </name>
<styleUrl>#icon</styleUrl>
<Point>
<coordinates>
-104.5,32.1222
</coordinates>
</Point>
</Placemark>
<Placemark>
<name>
            </name>
<styleUrl>#icon</styleUrl>
<Point>
<coordinates>
-104.5,31.5667
</coordinates>
</Point>
</Placemark>
<Placemark>
<name>
            </name>
<styleUrl>#icon</styleUrl>
<Point>
<coordinates>
-104.5,31.0111
</coordinates>
</Point>
</Placemark>
<Placemark>
<name>
            </name>
<styleUrl>#icon</styleUrl>
<Point>
<coordinates>
-104.5,30.4556
</coordinates>
</Point>
</Placemark>
<Placemark>
<name>
            </name>
<styleUrl>#icon</styleUrl>
<Point>
<coordinates>
-104.5,29.9
</coordinates>
</Point>
</Placemark>
<Placemark>
<name>
            </name>
<styleUrl>#icon</styleUrl>
<Point>
<coordinates>
-104.5,29.3444
</coordinates>
</Point>
</Placemark>
<Placemark>
<name>
            </name>
<styleUrl>#icon</styleUrl>
<Point>
<coordinates>
-104.5,28.7889
</coordinates>
</Point>
</Placemark>
<Placemark>
<name>
            </name>
<styleUrl>#icon</styleUrl>
<Point>
<coordinates>
-104.5,28.2333
</coordinates>
</Point>
</Placemark>
<Placemark>
<name>
            </name>
<styleUrl>#icon</styleUrl>
<Point>
<coordinates>
-104.5,27.6778
</coordinates>
</Point>
</Placemark>
<Placemark>
<name>
            </name>
<styleUrl>#icon</styleUrl>
<Point>
<coordinates>
-104.5,27.1222
</coordinates>
</Point>
</Placemark>
<Placemark>
<name>
            </name>
<styleUrl>#icon</styleUrl>
<Point>
<coordinates>
-104.5,26.5667
</coordinates>
</Point>
</Placemark>
<Placemark>
<name>
            </name>
<styleUrl>#icon</styleUrl>
<Point>
<coordinates>
-104.5,26.0111
</coordinates>
</Point>
</Placemark>
<Placemark>
<name>
            </name>
<styleUrl>#icon</styleUrl>
<Point>
<coordinates>
-104.5,25.4556
</coordinates>
</Point>
</Placemark>
<Placemark>
<name>
            </name>
<styleUrl>#icon</styleUrl>
<Point>
<coordinates>
-104.5,24.9
</coordinates>
</Point>
</Placemark>
<Placemark>
<name>
            </name>
<styleUrl>#icon</styleUrl>
<Point>
<coordinates>
-104.5,24.3444
</coordinates>
</Point>
</Placemark>
<Placemark>
<name>
            </name>
<styleUrl>#icon</styleUrl>
<Point>
<coordinates>
-103.6667,48.7889
</coordinates>
</Point>
</Placemark>
<Placemark>
<name>
            </name>
<styleUrl>#icon</styleUrl>
<Point>
<coordinates>
-103.6667,48.2333
</coordinates>
</Point>
</Placemark>
<Placemark>
<name>
            </name>
<styleUrl>#icon</styleUrl>
<Point>
<coordinates>
-103.6667,47.6778
</coordinates>
</Point>
</Placemark>
<Placemark>
<name>
            </name>
<styleUrl>#icon</styleUrl>
<Point>
<coordinates>
-103.6667,47.1222
</coordinates>
</Point>
</Placemark>
<Placemark>
<name>
            </name>
<styleUrl>#icon</styleUrl>
<Point>
<coordinates>
-103.6667,46.5667
</coordinates>
</Point>
</Placemark>
<Placemark>
<name>
            </name>
<styleUrl>#icon</styleUrl>
<Point>
<coordinates>
-103.6667,46.0111
</coordinates>
</Point>
</Placemark>
<Placemark>
<name>
            </name>
<styleUrl>#icon</styleUrl>
<Point>
<coordinates>
-103.6667,45.4556
</coordinates>
</Point>
</Placemark>
<Placemark>
<name>
            </name>
<styleUrl>#icon</styleUrl>
<Point>
<coordinates>
-103.6667,44.9
</coordinates>
</Point>
</Placemark>
<Placemark>
<name>
            </name>
<styleUrl>#icon</styleUrl>
<Point>
<coordinates>
-103.6667,43.2333
</coordinates>
</Point>
</Placemark>
<Placemark>
<name>
            </name>
<styleUrl>#icon</styleUrl>
<Point>
<coordinates>
-103.6667,42.6778
</coordinates>
</Point>
</Placemark>
<Placemark>
<name>
            </name>
<styleUrl>#icon</styleUrl>
<Point>
<coordinates>
-103.6667,42.1222
</coordinates>
</Point>
</Placemark>
<Placemark>
<name>
            </name>
<styleUrl>#icon</styleUrl>
<Point>
<coordinates>
-103.6667,41.5667
</coordinates>
</Point>
</Placemark>
<Placemark>
<name>
            </name>
<styleUrl>#icon</styleUrl>
<Point>
<coordinates>
-103.6667,41.0111
</coordinates>
</Point>
</Placemark>
<Placemark>
<name>
            </name>
<styleUrl>#icon</styleUrl>
<Point>
<coordinates>
-103.6667,40.4556
</coordinates>
</Point>
</Placemark>
<Placemark>
<name>
            </name>
<styleUrl>#icon</styleUrl>
<Point>
<coordinates>
-103.6667,39.9
</coordinates>
</Point>
</Placemark>
<Placemark>
<name>
            </name>
<styleUrl>#icon</styleUrl>
<Point>
<coordinates>
-103.6667,39.3444
</coordinates>
</Point>
</Placemark>
<Placemark>
<name>
            </name>
<styleUrl>#icon</styleUrl>
<Point>
<coordinates>
-103.6667,38.7889
</coordinates>
</Point>
</Placemark>
<Placemark>
<name>
            </name>
<styleUrl>#icon</styleUrl>
<Point>
<coordinates>
-103.6667,38.2333
</coordinates>
</Point>
</Placemark>
<Placemark>
<name>
            </name>
<styleUrl>#icon</styleUrl>
<Point>
<coordinates>
-103.6667,37.6778
</coordinates>
</Point>
</Placemark>
<Placemark>
<name>
            </name>
<styleUrl>#icon</styleUrl>
<Point>
<coordinates>
-103.6667,37.1222
</coordinates>
</Point>
</Placemark>
<Placemark>
<name>
            </name>
<styleUrl>#icon</styleUrl>
<Point>
<coordinates>
-103.6667,36.5667
</coordinates>
</Point>
</Placemark>
<Placemark>
<name>
            </name>
<styleUrl>#icon</styleUrl>
<Point>
<coordinates>
-103.6667,36.0111
</coordinates>
</Point>
</Placemark>
<Placemark>
<name>
            </name>
<styleUrl>#icon</styleUrl>
<Point>
<coordinates>
-103.6667,35.4556
</coordinates>
</Point>
</Placemark>
<Placemark>
<name>
            </name>
<styleUrl>#icon</styleUrl>
<Point>
<coordinates>
-103.6667,34.9
</coordinates>
</Point>
</Placemark>
<Placemark>
<name>
            </name>
<styleUrl>#icon</styleUrl>
<Point>
<coordinates>
-103.6667,34.3444
</coordinates>
</Point>
</Placemark>
<Placemark>
<name>
            </name>
<styleUrl>#icon</styleUrl>
<Point>
<coordinates>
-103.6667,33.7889
</coordinates>
</Point>
</Placemark>
<Placemark>
<name>
            </name>
<styleUrl>#icon</styleUrl>
<Point>
<coordinates>
-103.6667,33.2333
</coordinates>
</Point>
</Placemark>
<Placemark>
<name>
            </name>
<styleUrl>#icon</styleUrl>
<Point>
<coordinates>
-103.6667,32.6778
</coordinates>
</Point>
</Placemark>
<Placemark>
<name>
            </name>
<styleUrl>#icon</styleUrl>
<Point>
<coordinates>
-103.6667,32.1222
</coordinates>
</Point>
</Placemark>
<Placemark>
<name>
            </name>
<styleUrl>#icon</styleUrl>
<Point>
<coordinates>
-103.6667,31.5667
</coordinates>
</Point>
</Placemark>
<Placemark>
<name>
            </name>
<styleUrl>#icon</styleUrl>
<Point>
<coordinates>
-103.6667,31.0111
</coordinates>
</Point>
</Placemark>
<Placemark>
<name>
            </name>
<styleUrl>#icon</styleUrl>
<Point>
<coordinates>
-103.6667,30.4556
</coordinates>
</Point>
</Placemark>
<Placemark>
<name>
            </name>
<styleUrl>#icon</styleUrl>
<Point>
<coordinates>
-103.6667,29.9
</coordinates>
</Point>
</Placemark>
<Placemark>
<name>
            </name>
<styleUrl>#icon</styleUrl>
<Point>
<coordinates>
-103.6667,29.3444
</coordinates>
</Point>
</Placemark>
<Placemark>
<name>
            </name>
<styleUrl>#icon</styleUrl>
<Point>
<coordinates>
-103.6667,28.7889
</coordinates>
</Point>
</Placemark>
<Placemark>
<name>
            </name>
<styleUrl>#icon</styleUrl>
<Point>
<coordinates>
-103.6667,28.2333
</coordinates>
</Point>
</Placemark>
<Placemark>
<name>
            </name>
<styleUrl>#icon</styleUrl>
<Point>
<coordinates>
-103.6667,27.6778
</coordinates>
</Point>
</Placemark>
<Placemark>
<name>
            </name>
<styleUrl>#icon</styleUrl>
<Point>
<coordinates>
-103.6667,27.1222
</coordinates>
</Point>
</Placemark>
<Placemark>
<name>
            </name>
<styleUrl>#icon</styleUrl>
<Point>
<coordinates>
-103.6667,26.5667
</coordinates>
</Point>
</Placemark>
<Placemark>
<name>
            </name>
<styleUrl>#icon</styleUrl>
<Point>
<coordinates>
-103.6667,26.0111
</coordinates>
</Point>
</Placemark>
<Placemark>
<name>
            </name>
<styleUrl>#icon</styleUrl>
<Point>
<coordinates>
-103.6667,25.4556
</coordinates>
</Point>
</Placemark>
<Placemark>
<name>
            </name>
<styleUrl>#icon</styleUrl>
<Point>
<coordinates>
-103.6667,24.9
</coordinates>
</Point>
</Placemark>
<Placemark>
<name>
            </name>
<styleUrl>#icon</styleUrl>
<Point>
<coordinates>
-103.6667,24.3444
</coordinates>
</Point>
</Placemark>
<Placemark>
<name>
            </name>
<styleUrl>#icon</styleUrl>
<Point>
<coordinates>
-103.6667,23.7889
</coordinates>
</Point>
</Placemark>
<Placemark>
<name>
            </name>
<styleUrl>#icon</styleUrl>
<Point>
<coordinates>
-103.6667,23.2333
</coordinates>
</Point>
</Placemark>
<Placemark>
<name>
            </name>
<styleUrl>#icon</styleUrl>
<Point>
<coordinates>
-102.8333,47.6778
</coordinates>
</Point>
</Placemark>
<Placemark>
<name>
            </name>
<styleUrl>#icon</styleUrl>
<Point>
<coordinates>
-102.8333,46.5667
</coordinates>
</Point>
</Placemark>
<Placemark>
<name>
            </name>
<styleUrl>#icon</styleUrl>
<Point>
<coordinates>
-102.8333,46.0111
</coordinates>
</Point>
</Placemark>
<Placemark>
<name>
            </name>
<styleUrl>#icon</styleUrl>
<Point>
<coordinates>
-102.8333,45.4556
</coordinates>
</Point>
</Placemark>
<Placemark>
<name>
            </name>
<styleUrl>#icon</styleUrl>
<Point>
<coordinates>
-102.8333,44.9
</coordinates>
</Point>
</Placemark>
<Placemark>
<name>
            </name>
<styleUrl>#icon</styleUrl>
<Point>
<coordinates>
-102.8333,44.3444
</coordinates>
</Point>
</Placemark>
<Placemark>
<name>
            </name>
<styleUrl>#icon</styleUrl>
<Point>
<coordinates>
-102.8333,43.7889
</coordinates>
</Point>
</Placemark>
<Placemark>
<name>
            </name>
<styleUrl>#icon</styleUrl>
<Point>
<coordinates>
-102.8333,43.2333
</coordinates>
</Point>
</Placemark>
<Placemark>
<name>
            </name>
<styleUrl>#icon</styleUrl>
<Point>
<coordinates>
-102.8333,42.6778
</coordinates>
</Point>
</Placemark>
<Placemark>
<name>
            </name>
<styleUrl>#icon</styleUrl>
<Point>
<coordinates>
-102.8333,42.1222
</coordinates>
</Point>
</Placemark>
<Placemark>
<name>
            </name>
<styleUrl>#icon</styleUrl>
<Point>
<coordinates>
-102.8333,41.5667
</coordinates>
</Point>
</Placemark>
<Placemark>
<name>
            </name>
<styleUrl>#icon</styleUrl>
<Point>
<coordinates>
-102.8333,41.0111
</coordinates>
</Point>
</Placemark>
<Placemark>
<name>
            </name>
<styleUrl>#icon</styleUrl>
<Point>
<coordinates>
-102.8333,40.4556
</coordinates>
</Point>
</Placemark>
<Placemark>
<name>
            </name>
<styleUrl>#icon</styleUrl>
<Point>
<coordinates>
-102.8333,39.9
</coordinates>
</Point>
</Placemark>
<Placemark>
<name>
            </name>
<styleUrl>#icon</styleUrl>
<Point>
<coordinates>
-102.8333,39.3444
</coordinates>
</Point>
</Placemark>
<Placemark>
<name>
            </name>
<styleUrl>#icon</styleUrl>
<Point>
<coordinates>
-102.8333,38.7889
</coordinates>
</Point>
</Placemark>
<Placemark>
<name>
            </name>
<styleUrl>#icon</styleUrl>
<Point>
<coordinates>
-102.8333,38.2333
</coordinates>
</Point>
</Placemark>
<Placemark>
<name>
            </name>
<styleUrl>#icon</styleUrl>
<Point>
<coordinates>
-102.8333,37.6778
</coordinates>
</Point>
</Placemark>
<Placemark>
<name>
            </name>
<styleUrl>#icon</styleUrl>
<Point>
<coordinates>
-102.8333,37.1222
</coordinates>
</Point>
</Placemark>
<Placemark>
<name>
            </name>
<styleUrl>#icon</styleUrl>
<Point>
<coordinates>
-102.8333,36.5667
</coordinates>
</Point>
</Placemark>
<Placemark>
<name>
            </name>
<styleUrl>#icon</styleUrl>
<Point>
<coordinates>
-102.8333,36.0111
</coordinates>
</Point>
</Placemark>
<Placemark>
<name>
            </name>
<styleUrl>#icon</styleUrl>
<Point>
<coordinates>
-102.8333,35.4556
</coordinates>
</Point>
</Placemark>
<Placemark>
<name>
            </name>
<styleUrl>#icon</styleUrl>
<Point>
<coordinates>
-102.8333,34.9
</coordinates>
</Point>
</Placemark>
<Placemark>
<name>
            </name>
<styleUrl>#icon</styleUrl>
<Point>
<coordinates>
-102.8333,34.3444
</coordinates>
</Point>
</Placemark>
<Placemark>
<name>
            </name>
<styleUrl>#icon</styleUrl>
<Point>
<coordinates>
-102.8333,33.7889
</coordinates>
</Point>
</Placemark>
<Placemark>
<name>
            </name>
<styleUrl>#icon</styleUrl>
<Point>
<coordinates>
-102.8333,33.2333
</coordinates>
</Point>
</Placemark>
<Placemark>
<name>
            </name>
<styleUrl>#icon</styleUrl>
<Point>
<coordinates>
-102.8333,32.6778
</coordinates>
</Point>
</Placemark>
<Placemark>
<name>
    T (sparse)        </name>
<styleUrl>#icon</styleUrl>
<Point>
<coordinates>
-102.8333,32.1222
</coordinates>
</Point>
</Placemark>
<Placemark>
<name>
    T (local)        </name>
<styleUrl>#icon</styleUrl>
<Point>
<coordinates>
-102.8333,31.5667
</coordinates>
</Point>
</Placemark>
<Placemark>
<name>
            </name>
<styleUrl>#icon</styleUrl>
<Point>
<coordinates>
-102.8333,31.0111
</coordinates>
</Point>
</Placemark>
<Placemark>
<name>
            </name>
<styleUrl>#icon</styleUrl>
<Point>
<coordinates>
-102.8333,30.4556
</coordinates>
</Point>
</Placemark>
<Placemark>
<name>
            </name>
<styleUrl>#icon</styleUrl>
<Point>
<coordinates>
-102.8333,29.9
</coordinates>
</Point>
</Placemark>
<Placemark>
<name>
            </name>
<styleUrl>#icon</styleUrl>
<Point>
<coordinates>
-102.8333,29.3444
</coordinates>
</Point>
</Placemark>
<Placemark>
<name>
            </name>
<styleUrl>#icon</styleUrl>
<Point>
<coordinates>
-102.8333,28.7889
</coordinates>
</Point>
</Placemark>
<Placemark>
<name>
            </name>
<styleUrl>#icon</styleUrl>
<Point>
<coordinates>
-102.8333,28.2333
</coordinates>
</Point>
</Placemark>
<Placemark>
<name>
            </name>
<styleUrl>#icon</styleUrl>
<Point>
<coordinates>
-102.8333,27.6778
</coordinates>
</Point>
</Placemark>
<Placemark>
<name>
            </name>
<styleUrl>#icon</styleUrl>
<Point>
<coordinates>
-102.8333,27.1222
</coordinates>
</Point>
</Placemark>
<Placemark>
<name>
            </name>
<styleUrl>#icon</styleUrl>
<Point>
<coordinates>
-102.8333,26.5667
</coordinates>
</Point>
</Placemark>
<Placemark>
<name>
            </name>
<styleUrl>#icon</styleUrl>
<Point>
<coordinates>
-102.8333,26.0111
</coordinates>
</Point>
</Placemark>
<Placemark>
<name>
            </name>
<styleUrl>#icon</styleUrl>
<Point>
<coordinates>
-102.8333,25.4556
</coordinates>
</Point>
</Placemark>
<Placemark>
<name>
            </name>
<styleUrl>#icon</styleUrl>
<Point>
<coordinates>
-102.8333,24.9
</coordinates>
</Point>
</Placemark>
<Placemark>
<name>
            </name>
<styleUrl>#icon</styleUrl>
<Point>
<coordinates>
-102.8333,24.3444
</coordinates>
</Point>
</Placemark>
<Placemark>
<name>
            </name>
<styleUrl>#icon</styleUrl>
<Point>
<coordinates>
-102.8333,23.7889
</coordinates>
</Point>
</Placemark>
<Placemark>
<name>
            </name>
<styleUrl>#icon</styleUrl>
<Point>
<coordinates>
-102.8333,23.2333
</coordinates>
</Point>
</Placemark>
<Placemark>
<name>
            </name>
<styleUrl>#icon</styleUrl>
<Point>
<coordinates>
-102.8333,22.6778
</coordinates>
</Point>
</Placemark>
<Placemark>
<name>
            </name>
<styleUrl>#icon</styleUrl>
<Point>
<coordinates>
-102.8333,22.1222
</coordinates>
</Point>
</Placemark>
<Placemark>
<name>
            </name>
<styleUrl>#icon</styleUrl>
<Point>
<coordinates>
-102.8333,19.3444
</coordinates>
</Point>
</Placemark>
<Placemark>
<name>
            </name>
<styleUrl>#icon</styleUrl>
<Point>
<coordinates>
-102,46.5667
</coordinates>
</Point>
</Placemark>
<Placemark>
<name>
            </name>
<styleUrl>#icon</styleUrl>
<Point>
<coordinates>
-102,46.0111
</coordinates>
</Point>
</Placemark>
<Placemark>
<name>
            </name>
<styleUrl>#icon</styleUrl>
<Point>
<coordinates>
-102,45.4556
</coordinates>
</Point>
</Placemark>
<Placemark>
<name>
            </name>
<styleUrl>#icon</styleUrl>
<Point>
<coordinates>
-102,44.9
</coordinates>
</Point>
</Placemark>
<Placemark>
<name>
            </name>
<styleUrl>#icon</styleUrl>
<Point>
<coordinates>
-102,44.3444
</coordinates>
</Point>
</Placemark>
<Placemark>
<name>
            </name>
<styleUrl>#icon</styleUrl>
<Point>
<coordinates>
-102,43.7889
</coordinates>
</Point>
</Placemark>
<Placemark>
<name>
            </name>
<styleUrl>#icon</styleUrl>
<Point>
<coordinates>
-102,43.2333
</coordinates>
</Point>
</Placemark>
<Placemark>
<name>
            </name>
<styleUrl>#icon</styleUrl>
<Point>
<coordinates>
-102,42.6778
</coordinates>
</Point>
</Placemark>
<Placemark>
<name>
            </name>
<styleUrl>#icon</styleUrl>
<Point>
<coordinates>
-102,42.1222
</coordinates>
</Point>
</Placemark>
<Placemark>
<name>
            </name>
<styleUrl>#icon</styleUrl>
<Point>
<coordinates>
-102,41.5667
</coordinates>
</Point>
</Placemark>
<Placemark>
<name>
            </name>
<styleUrl>#icon</styleUrl>
<Point>
<coordinates>
-102,41.0111
</coordinates>
</Point>
</Placemark>
<Placemark>
<name>
            </name>
<styleUrl>#icon</styleUrl>
<Point>
<coordinates>
-102,40.4556
</coordinates>
</Point>
</Placemark>
<Placemark>
<name>
            </name>
<styleUrl>#icon</styleUrl>
<Point>
<coordinates>
-102,39.9
</coordinates>
</Point>
</Placemark>
<Placemark>
<name>
            </name>
<styleUrl>#icon</styleUrl>
<Point>
<coordinates>
-102,39.3444
</coordinates>
</Point>
</Placemark>
<Placemark>
<name>
            </name>
<styleUrl>#icon</styleUrl>
<Point>
<coordinates>
-102,38.7889
</coordinates>
</Point>
</Placemark>
<Placemark>
<name>
            </name>
<styleUrl>#icon</styleUrl>
<Point>
<coordinates>
-102,38.2333
</coordinates>
</Point>
</Placemark>
<Placemark>
<name>
            </name>
<styleUrl>#icon</styleUrl>
<Point>
<coordinates>
-102,37.6778
</coordinates>
</Point>
</Placemark>
<Placemark>
<name>
            </name>
<styleUrl>#icon</styleUrl>
<Point>
<coordinates>
-102,37.1222
</coordinates>
</Point>
</Placemark>
<Placemark>
<name>
            </name>
<styleUrl>#icon</styleUrl>
<Point>
<coordinates>
-102,36.5667
</coordinates>
</Point>
</Placemark>
<Placemark>
<name>
            </name>
<styleUrl>#icon</styleUrl>
<Point>
<coordinates>
-102,36.0111
</coordinates>
</Point>
</Placemark>
<Placemark>
<name>
            </name>
<styleUrl>#icon</styleUrl>
<Point>
<coordinates>
-102,35.4556
</coordinates>
</Point>
</Placemark>
<Placemark>
<name>
            </name>
<styleUrl>#icon</styleUrl>
<Point>
<coordinates>
-102,34.9
</coordinates>
</Point>
</Placemark>
<Placemark>
<name>
            </name>
<styleUrl>#icon</styleUrl>
<Point>
<coordinates>
-102,34.3444
</coordinates>
</Point>
</Placemark>
<Placemark>
<name>
            </name>
<styleUrl>#icon</styleUrl>
<Point>
<coordinates>
-102,33.7889
</coordinates>
</Point>
</Placemark>
<Placemark>
<name>
            </name>
<styleUrl>#icon</styleUrl>
<Point>
<coordinates>
-102,33.2333
</coordinates>
</Point>
</Placemark>
<Placemark>
<name>
            </name>
<styleUrl>#icon</styleUrl>
<Point>
<coordinates>
-102,32.6778
</coordinates>
</Point>
</Placemark>
<Placemark>
<name>
            </name>
<styleUrl>#icon</styleUrl>
<Point>
<coordinates>
-102,32.1222
</coordinates>
</Point>
</Placemark>
<Placemark>
<name>
    T (local)        </name>
<styleUrl>#icon</styleUrl>
<Point>
<coordinates>
-102,31.5667
</coordinates>
</Point>
</Placemark>
<Placemark>
<name>
            </name>
<styleUrl>#icon</styleUrl>
<Point>
<coordinates>
-102,31.0111
</coordinates>
</Point>
</Placemark>
<Placemark>
<name>
            </name>
<styleUrl>#icon</styleUrl>
<Point>
<coordinates>
-102,30.4556
</coordinates>
</Point>
</Placemark>
<Placemark>
<name>
            </name>
<styleUrl>#icon</styleUrl>
<Point>
<coordinates>
-102,29.9
</coordinates>
</Point>
</Placemark>
<Placemark>
<name>
            </name>
<styleUrl>#icon</styleUrl>
<Point>
<coordinates>
-102,29.3444
</coordinates>
</Point>
</Placemark>
<Placemark>
<name>
            </name>
<styleUrl>#icon</styleUrl>
<Point>
<coordinates>
-102,28.7889
</coordinates>
</Point>
</Placemark>
<Placemark>
<name>
            </name>
<styleUrl>#icon</styleUrl>
<Point>
<coordinates>
-102,28.2333
</coordinates>
</Point>
</Placemark>
<Placemark>
<name>
            </name>
<styleUrl>#icon</styleUrl>
<Point>
<coordinates>
-102,27.6778
</coordinates>
</Point>
</Placemark>
<Placemark>
<name>
            </name>
<styleUrl>#icon</styleUrl>
<Point>
<coordinates>
-102,27.1222
</coordinates>
</Point>
</Placemark>
<Placemark>
<name>
            </name>
<styleUrl>#icon</styleUrl>
<Point>
<coordinates>
-102,26.5667
</coordinates>
</Point>
</Placemark>
<Placemark>
<name>
            </name>
<styleUrl>#icon</styleUrl>
<Point>
<coordinates>
-102,26.0111
</coordinates>
</Point>
</Placemark>
<Placemark>
<name>
            </name>
<styleUrl>#icon</styleUrl>
<Point>
<coordinates>
-102,25.4556
</coordinates>
</Point>
</Placemark>
<Placemark>
<name>
            </name>
<styleUrl>#icon</styleUrl>
<Point>
<coordinates>
-102,24.9
</coordinates>
</Point>
</Placemark>
<Placemark>
<name>
            </name>
<styleUrl>#icon</styleUrl>
<Point>
<coordinates>
-102,24.3444
</coordinates>
</Point>
</Placemark>
<Placemark>
<name>
            </name>
<styleUrl>#icon</styleUrl>
<Point>
<coordinates>
-102,23.7889
</coordinates>
</Point>
</Placemark>
<Placemark>
<name>
            </name>
<styleUrl>#icon</styleUrl>
<Point>
<coordinates>
-102,23.2333
</coordinates>
</Point>
</Placemark>
<Placemark>
<name>
            </name>
<styleUrl>#icon</styleUrl>
<Point>
<coordinates>
-102,22.6778
</coordinates>
</Point>
</Placemark>
<Placemark>
<name>
            </name>
<styleUrl>#icon</styleUrl>
<Point>
<coordinates>
-102,22.1222
</coordinates>
</Point>
</Placemark>
<Placemark>
<name>
            </name>
<styleUrl>#icon</styleUrl>
<Point>
<coordinates>
-101.1667,46.5667
</coordinates>
</Point>
</Placemark>
<Placemark>
<name>
            </name>
<styleUrl>#icon</styleUrl>
<Point>
<coordinates>
-101.1667,46.0111
</coordinates>
</Point>
</Placemark>
<Placemark>
<name>
            </name>
<styleUrl>#icon</styleUrl>
<Point>
<coordinates>
-101.1667,44.9
</coordinates>
</Point>
</Placemark>
<Placemark>
<name>
            </name>
<styleUrl>#icon</styleUrl>
<Point>
<coordinates>
-101.1667,44.3444
</coordinates>
</Point>
</Placemark>
<Placemark>
<name>
            </name>
<styleUrl>#icon</styleUrl>
<Point>
<coordinates>
-101.1667,43.7889
</coordinates>
</Point>
</Placemark>
<Placemark>
<name>
            </name>
<styleUrl>#icon</styleUrl>
<Point>
<coordinates>
-101.1667,39.3444
</coordinates>
</Point>
</Placemark>
<Placemark>
<name>
            </name>
<styleUrl>#icon</styleUrl>
<Point>
<coordinates>
-101.1667,38.7889
</coordinates>
</Point>
</Placemark>
<Placemark>
<name>
            </name>
<styleUrl>#icon</styleUrl>
<Point>
<coordinates>
-101.1667,38.2333
</coordinates>
</Point>
</Placemark>
<Placemark>
<name>
            </name>
<styleUrl>#icon</styleUrl>
<Point>
<coordinates>
-101.1667,37.6778
</coordinates>
</Point>
</Placemark>
<Placemark>
<name>
            </name>
<styleUrl>#icon</styleUrl>
<Point>
<coordinates>
-101.1667,37.1222
</coordinates>
</Point>
</Placemark>
<Placemark>
<name>
            </name>
<styleUrl>#icon</styleUrl>
<Point>
<coordinates>
-101.1667,36.5667
</coordinates>
</Point>
</Placemark>
<Placemark>
<name>
            </name>
<styleUrl>#icon</styleUrl>
<Point>
<coordinates>
-101.1667,36.0111
</coordinates>
</Point>
</Placemark>
<Placemark>
<name>
            </name>
<styleUrl>#icon</styleUrl>
<Point>
<coordinates>
-101.1667,35.4556
</coordinates>
</Point>
</Placemark>
<Placemark>
<name>
            </name>
<styleUrl>#icon</styleUrl>
<Point>
<coordinates>
-101.1667,34.9
</coordinates>
</Point>
</Placemark>
<Placemark>
<name>
            </name>
<styleUrl>#icon</styleUrl>
<Point>
<coordinates>
-101.1667,34.3444
</coordinates>
</Point>
</Placemark>
<Placemark>
<name>
            </name>
<styleUrl>#icon</styleUrl>
<Point>
<coordinates>
-101.1667,33.7889
</coordinates>
</Point>
</Placemark>
<Placemark>
<name>
            </name>
<styleUrl>#icon</styleUrl>
<Point>
<coordinates>
-101.1667,33.2333
</coordinates>
</Point>
</Placemark>
<Placemark>
<name>
            </name>
<styleUrl>#icon</styleUrl>
<Point>
<coordinates>
-101.1667,32.6778
</coordinates>
</Point>
</Placemark>
<Placemark>
<name>
            </name>
<styleUrl>#icon</styleUrl>
<Point>
<coordinates>
-101.1667,32.1222
</coordinates>
</Point>
</Placemark>
<Placemark>
<name>
            </name>
<styleUrl>#icon</styleUrl>
<Point>
<coordinates>
-101.1667,31.5667
</coordinates>
</Point>
</Placemark>
<Placemark>
<name>
            </name>
<styleUrl>#icon</styleUrl>
<Point>
<coordinates>
-101.1667,31.0111
</coordinates>
</Point>
</Placemark>
<Placemark>
<name>
            </name>
<styleUrl>#icon</styleUrl>
<Point>
<coordinates>
-101.1667,30.4556
</coordinates>
</Point>
</Placemark>
<Placemark>
<name>
            </name>
<styleUrl>#icon</styleUrl>
<Point>
<coordinates>
-101.1667,29.9
</coordinates>
</Point>
</Placemark>
<Placemark>
<name>
            </name>
<styleUrl>#icon</styleUrl>
<Point>
<coordinates>
-101.1667,29.3444
</coordinates>
</Point>
</Placemark>
<Placemark>
<name>
            </name>
<styleUrl>#icon</styleUrl>
<Point>
<coordinates>
-101.1667,28.7889
</coordinates>
</Point>
</Placemark>
<Placemark>
<name>
            </name>
<styleUrl>#icon</styleUrl>
<Point>
<coordinates>
-101.1667,28.2333
</coordinates>
</Point>
</Placemark>
<Placemark>
<name>
            </name>
<styleUrl>#icon</styleUrl>
<Point>
<coordinates>
-101.1667,27.6778
</coordinates>
</Point>
</Placemark>
<Placemark>
<name>
            </name>
<styleUrl>#icon</styleUrl>
<Point>
<coordinates>
-101.1667,27.1222
</coordinates>
</Point>
</Placemark>
<Placemark>
<name>
            </name>
<styleUrl>#icon</styleUrl>
<Point>
<coordinates>
-101.1667,26.5667
</coordinates>
</Point>
</Placemark>
<Placemark>
<name>
            </name>
<styleUrl>#icon</styleUrl>
<Point>
<coordinates>
-101.1667,26.0111
</coordinates>
</Point>
</Placemark>
<Placemark>
<name>
            </name>
<styleUrl>#icon</styleUrl>
<Point>
<coordinates>
-101.1667,25.4556
</coordinates>
</Point>
</Placemark>
<Placemark>
<name>
            </name>
<styleUrl>#icon</styleUrl>
<Point>
<coordinates>
-101.1667,24.9
</coordinates>
</Point>
</Placemark>
<Placemark>
<name>
            </name>
<styleUrl>#icon</styleUrl>
<Point>
<coordinates>
-101.1667,24.3444
</coordinates>
</Point>
</Placemark>
<Placemark>
<name>
            </name>
<styleUrl>#icon</styleUrl>
<Point>
<coordinates>
-101.1667,23.7889
</coordinates>
</Point>
</Placemark>
<Placemark>
<name>
            </name>
<styleUrl>#icon</styleUrl>
<Point>
<coordinates>
-101.1667,23.2333
</coordinates>
</Point>
</Placemark>
<Placemark>
<name>
            </name>
<styleUrl>#icon</styleUrl>
<Point>
<coordinates>
-101.1667,22.6778
</coordinates>
</Point>
</Placemark>
<Placemark>
<name>
            </name>
<styleUrl>#icon</styleUrl>
<Point>
<coordinates>
-101.1667,22.1222
</coordinates>
</Point>
</Placemark>
<Placemark>
<name>
            </name>
<styleUrl>#icon</styleUrl>
<Point>
<coordinates>
-101.1667,21.0111
</coordinates>
</Point>
</Placemark>
<Placemark>
<name>
            </name>
<styleUrl>#icon</styleUrl>
<Point>
<coordinates>
-100.3333,37.6778
</coordinates>
</Point>
</Placemark>
<Placemark>
<name>
            </name>
<styleUrl>#icon</styleUrl>
<Point>
<coordinates>
-100.3333,37.1222
</coordinates>
</Point>
</Placemark>
<Placemark>
<name>
            </name>
<styleUrl>#icon</styleUrl>
<Point>
<coordinates>
-100.3333,36.5667
</coordinates>
</Point>
</Placemark>
<Placemark>
<name>
            </name>
<styleUrl>#icon</styleUrl>
<Point>
<coordinates>
-100.3333,36.0111
</coordinates>
</Point>
</Placemark>
<Placemark>
<name>
            </name>
<styleUrl>#icon</styleUrl>
<Point>
<coordinates>
-100.3333,35.4556
</coordinates>
</Point>
</Placemark>
<Placemark>
<name>
            </name>
<styleUrl>#icon</styleUrl>
<Point>
<coordinates>
-100.3333,34.9
</coordinates>
</Point>
</Placemark>
<Placemark>
<name>
            </name>
<styleUrl>#icon</styleUrl>
<Point>
<coordinates>
-100.3333,34.3444
</coordinates>
</Point>
</Placemark>
<Placemark>
<name>
            </name>
<styleUrl>#icon</styleUrl>
<Point>
<coordinates>
-100.3333,33.7889
</coordinates>
</Point>
</Placemark>
<Placemark>
<name>
            </name>
<styleUrl>#icon</styleUrl>
<Point>
<coordinates>
-100.3333,33.2333
</coordinates>
</Point>
</Placemark>
<Placemark>
<name>
            </name>
<styleUrl>#icon</styleUrl>
<Point>
<coordinates>
-100.3333,32.6778
</coordinates>
</Point>
</Placemark>
<Placemark>
<name>
            </name>
<styleUrl>#icon</styleUrl>
<Point>
<coordinates>
-100.3333,32.1222
</coordinates>
</Point>
</Placemark>
<Placemark>
<name>
            </name>
<styleUrl>#icon</styleUrl>
<Point>
<coordinates>
-100.3333,31.5667
</coordinates>
</Point>
</Placemark>
<Placemark>
<name>
            </name>
<styleUrl>#icon</styleUrl>
<Point>
<coordinates>
-100.3333,31.0111
</coordinates>
</Point>
</Placemark>
<Placemark>
<name>
            </name>
<styleUrl>#icon</styleUrl>
<Point>
<coordinates>
-100.3333,30.4556
</coordinates>
</Point>
</Placemark>
<Placemark>
<name>
            </name>
<styleUrl>#icon</styleUrl>
<Point>
<coordinates>
-100.3333,29.9
</coordinates>
</Point>
</Placemark>
<Placemark>
<name>
            </name>
<styleUrl>#icon</styleUrl>
<Point>
<coordinates>
-100.3333,29.3444
</coordinates>
</Point>
</Placemark>
<Placemark>
<name>
            </name>
<styleUrl>#icon</styleUrl>
<Point>
<coordinates>
-100.3333,28.7889
</coordinates>
</Point>
</Placemark>
<Placemark>
<name>
            </name>
<styleUrl>#icon</styleUrl>
<Point>
<coordinates>
-100.3333,28.2333
</coordinates>
</Point>
</Placemark>
<Placemark>
<name>
            </name>
<styleUrl>#icon</styleUrl>
<Point>
<coordinates>
-100.3333,27.6778
</coordinates>
</Point>
</Placemark>
<Placemark>
<name>
            </name>
<styleUrl>#icon</styleUrl>
<Point>
<coordinates>
-100.3333,27.1222
</coordinates>
</Point>
</Placemark>
<Placemark>
<name>
            </name>
<styleUrl>#icon</styleUrl>
<Point>
<coordinates>
-100.3333,26.5667
</coordinates>
</Point>
</Placemark>
<Placemark>
<name>
            </name>
<styleUrl>#icon</styleUrl>
<Point>
<coordinates>
-100.3333,26.0111
</coordinates>
</Point>
</Placemark>
<Placemark>
<name>
            </name>
<styleUrl>#icon</styleUrl>
<Point>
<coordinates>
-100.3333,25.4556
</coordinates>
</Point>
</Placemark>
<Placemark>
<name>
            </name>
<styleUrl>#icon</styleUrl>
<Point>
<coordinates>
-100.3333,24.9
</coordinates>
</Point>
</Placemark>
<Placemark>
<name>
            </name>
<styleUrl>#icon</styleUrl>
<Point>
<coordinates>
-100.3333,24.3444
</coordinates>
</Point>
</Placemark>
<Placemark>
<name>
            </name>
<styleUrl>#icon</styleUrl>
<Point>
<coordinates>
-100.3333,23.7889
</coordinates>
</Point>
</Placemark>
<Placemark>
<name>
            </name>
<styleUrl>#icon</styleUrl>
<Point>
<coordinates>
-100.3333,23.2333
</coordinates>
</Point>
</Placemark>
<Placemark>
<name>
            </name>
<styleUrl>#icon</styleUrl>
<Point>
<coordinates>
-100.3333,22.6778
</coordinates>
</Point>
</Placemark>
<Placemark>
<name>
            </name>
<styleUrl>#icon</styleUrl>
<Point>
<coordinates>
-100.3333,22.1222
</coordinates>
</Point>
</Placemark>
<Placemark>
<name>
            </name>
<styleUrl>#icon</styleUrl>
<Point>
<coordinates>
-100.3333,21.5667
</coordinates>
</Point>
</Placemark>
<Placemark>
<name>
            </name>
<styleUrl>#icon</styleUrl>
<Point>
<coordinates>
-100.3333,21.0111
</coordinates>
</Point>
</Placemark>
<Placemark>
<name>
            </name>
<styleUrl>#icon</styleUrl>
<Point>
<coordinates>
-99.5,33.2333
</coordinates>
</Point>
</Placemark>
<Placemark>
<name>
            </name>
<styleUrl>#icon</styleUrl>
<Point>
<coordinates>
-99.5,32.1222
</coordinates>
</Point>
</Placemark>
<Placemark>
<name>
            </name>
<styleUrl>#icon</styleUrl>
<Point>
<coordinates>
-99.5,31.5667
</coordinates>
</Point>
</Placemark>
<Placemark>
<name>
            </name>
<styleUrl>#icon</styleUrl>
<Point>
<coordinates>
-99.5,31.0111
</coordinates>
</Point>
</Placemark>
<Placemark>
<name>
            </name>
<styleUrl>#icon</styleUrl>
<Point>
<coordinates>
-99.5,29.3444
</coordinates>
</Point>
</Placemark>
<Placemark>
<name>
            </name>
<styleUrl>#icon</styleUrl>
<Point>
<coordinates>
-99.5,28.7889
</coordinates>
</Point>
</Placemark>
<Placemark>
<name>
            </name>
<styleUrl>#icon</styleUrl>
<Point>
<coordinates>
-99.5,28.2333
</coordinates>
</Point>
</Placemark>
<Placemark>
<name>
            </name>
<styleUrl>#icon</styleUrl>
<Point>
<coordinates>
-99.5,27.6778
</coordinates>
</Point>
</Placemark>
<Placemark>
<name>
            </name>
<styleUrl>#icon</styleUrl>
<Point>
<coordinates>
-99.5,27.1222
</coordinates>
</Point>
</Placemark>
<Placemark>
<name>
            </name>
<styleUrl>#icon</styleUrl>
<Point>
<coordinates>
-99.5,26.5667
</coordinates>
</Point>
</Placemark>
<Placemark>
<name>
            </name>
<styleUrl>#icon</styleUrl>
<Point>
<coordinates>
-99.5,26.0111
</coordinates>
</Point>
</Placemark>
<Placemark>
<name>
            </name>
<styleUrl>#icon</styleUrl>
<Point>
<coordinates>
-99.5,23.2333
</coordinates>
</Point>
</Placemark>
<Placemark>
<name>
            </name>
<styleUrl>#icon</styleUrl>
<Point>
<coordinates>
-99.5,22.6778
</coordinates>
</Point>
</Placemark>
<Placemark>
<name>
            </name>
<styleUrl>#icon</styleUrl>
<Point>
<coordinates>
-99.5,22.1222
</coordinates>
</Point>
</Placemark>
<Placemark>
<name>
            </name>
<styleUrl>#icon</styleUrl>
<Point>
<coordinates>
-99.5,21.5667
</coordinates>
</Point>
</Placemark>
<Placemark>
<name>
            </name>
<styleUrl>#icon</styleUrl>
<Point>
<coordinates>
-99.5,21.0111
</coordinates>
</Point>
</Placemark>
<Placemark>
<name>
            </name>
<styleUrl>#icon</styleUrl>
<Point>
<coordinates>
-98.6667,28.7889
</coordinates>
</Point>
</Placemark>
<Placemark>
<name>
            </name>
<styleUrl>#icon</styleUrl>
<Point>
<coordinates>
-98.6667,28.2333
</coordinates>
</Point>
</Placemark>
<Placemark>
<name>
            </name>
<styleUrl>#icon</styleUrl>
<Point>
<coordinates>
-98.6667,27.6778
</coordinates>
</Point>
</Placemark>
<Placemark>
<name>
            </name>
<styleUrl>#icon</styleUrl>
<Point>
<coordinates>
-98.6667,27.1222
</coordinates>
</Point>
</Placemark>
<Placemark>
<name>
            </name>
<styleUrl>#icon</styleUrl>
<Point>
<coordinates>
-98.6667,26.5667
</coordinates>
</Point>
</Placemark>
<Placemark>
<name>
            </name>
<styleUrl>#icon</styleUrl>
<Point>
<coordinates>
-98.6667,26.0111
</coordinates>
</Point>
</Placemark>
<Placemark>
<name>
            </name>
<styleUrl>#icon</styleUrl>
<Point>
<coordinates>
-98.6667,25.4556
</coordinates>
</Point>
</Placemark>
<Placemark>
<name>
            </name>
<styleUrl>#icon</styleUrl>
<Point>
<coordinates>
-98.6667,24.9
</coordinates>
</Point>
</Placemark>
<Placemark>
<name>
            </name>
<styleUrl>#icon</styleUrl>
<Point>
<coordinates>
-98.6667,24.3444
</coordinates>
</Point>
</Placemark>
<Placemark>
<name>
            </name>
<styleUrl>#icon</styleUrl>
<Point>
<coordinates>
-98.6667,23.7889
</coordinates>
</Point>
</Placemark>
<Placemark>
<name>
            </name>
<styleUrl>#icon</styleUrl>
<Point>
<coordinates>
-98.6667,23.2333
</coordinates>
</Point>
</Placemark>
<Placemark>
<name>
            </name>
<styleUrl>#icon</styleUrl>
<Point>
<coordinates>
-97.8333,27.6778
</coordinates>
</Point>
</Placemark>
<Placemark>
<name>
            </name>
<styleUrl>#icon</styleUrl>
<Point>
<coordinates>
-97.8333,27.1222
</coordinates>
</Point>
</Placemark>
<Placemark>
<name>
            </name>
<styleUrl>#icon</styleUrl>
<Point>
<coordinates>
-97.8333,26.5667
</coordinates>
</Point>
</Placemark>
<Placemark>
<name>
            </name>
<styleUrl>#icon</styleUrl>
<Point>
<coordinates>
-97.8333,26.0111
</coordinates>
</Point>
</Placemark>
<Placemark>
<name>
            </name>
<styleUrl>#icon</styleUrl>
<Point>
<coordinates>
-97.8333,25.4556
</coordinates>
</Point>
</Placemark>
<Placemark>
<name>
            </name>
<styleUrl>#icon</styleUrl>
<Point>
<coordinates>
-97.8333,24.9
</coordinates>
</Point>
</Placemark>
<Placemark>
<name>
            </name>
<styleUrl>#icon</styleUrl>
<Point>
<coordinates>
-97.8333,24.3444
</coordinates>
</Point>
</Placemark>
<Placemark>
<name>
            </name>
<styleUrl>#icon</styleUrl>
<Point>
<coordinates>
-97.8333,18.7889
</coordinates>
</Point>
</Placemark>
<Placemark>
<name>
            </name>
<styleUrl>#icon</styleUrl>
<Point>
<coordinates>
-97.8333,18.2333
</coordinates>
</Point>
</Placemark>
<Placemark>
<name>
            </name>
<styleUrl>#icon</styleUrl>
<Point>
<coordinates>
-97,18.2333
</coordinates>
</Point>
</Placemark>
<Placemark>
<name>
            </name>
<styleUrl>#icon</styleUrl>
<Point>
<coordinates>
-96.1667,17.1222
</coordinates>
</Point>
</Placemark>
<Placemark>
<name>
            </name>
<styleUrl>#icon</styleUrl>
<Point>
<coordinates>
-81.1667,-4.5444
</coordinates>
</Point>
</Placemark>
<Placemark>
<name>
            </name>
<styleUrl>#icon</styleUrl>
<Point>
<coordinates>
-80.3333,-2.3222
</coordinates>
</Point>
</Placemark>
<Placemark>
<name>
            </name>
<styleUrl>#icon</styleUrl>
<Point>
<coordinates>
-80.3333,-3.4333
</coordinates>
</Point>
</Placemark>
<Placemark>
<name>
            </name>
<styleUrl>#icon</styleUrl>
<Point>
<coordinates>
-80.3333,-3.9889
</coordinates>
</Point>
</Placemark>
<Placemark>
<name>
            </name>
<styleUrl>#icon</styleUrl>
<Point>
<coordinates>
-80.3333,-4.5444
</coordinates>
</Point>
</Placemark>
<Placemark>
<name>
    T (local)        </name>
<styleUrl>#icon</styleUrl>
<Point>
<coordinates>
-80.3333,-5.1
</coordinates>
</Point>
</Placemark>
<Placemark>
<name>
B (local)    T (local)        </name>
<styleUrl>#icon</styleUrl>
<Point>
<coordinates>
-80.3333,-5.6556
</coordinates>
</Point>
</Placemark>
<Placemark>
<name>
B (local)    T (local)        </name>
<styleUrl>#icon</styleUrl>
<Point>
<coordinates>
-80.3333,-6.2111
</coordinates>
</Point>
</Placemark>
<Placemark>
<name>
            </name>
<styleUrl>#icon</styleUrl>
<Point>
<coordinates>
-79.5,-5.1
</coordinates>
</Point>
</Placemark>
<Placemark>
<name>
            </name>
<styleUrl>#icon</styleUrl>
<Point>
<coordinates>
-79.5,-5.6556
</coordinates>
</Point>
</Placemark>
<Placemark>
<name>
            </name>
<styleUrl>#icon</styleUrl>
<Point>
<coordinates>
-79.5,-6.2111
</coordinates>
</Point>
</Placemark>
<Placemark>
<name>
B (local)    T (local)        </name>
<styleUrl>#icon</styleUrl>
<Point>
<coordinates>
-79.5,-6.7667
</coordinates>
</Point>
</Placemark>
<Placemark>
<name>
            </name>
<styleUrl>#icon</styleUrl>
<Point>
<coordinates>
-78.6667,-7.3222
</coordinates>
</Point>
</Placemark>
<Placemark>
<name>
B (local)    T (local)        </name>
<styleUrl>#icon</styleUrl>
<Point>
<coordinates>
-78.6667,-7.8778
</coordinates>
</Point>
</Placemark>
<Placemark>
<name>
B (local)    T (local)        </name>
<styleUrl>#icon</styleUrl>
<Point>
<coordinates>
-78.6667,-8.4333
</coordinates>
</Point>
</Placemark>
<Placemark>
<name>
B (local)    T (local)    L (local)    </name>
<styleUrl>#icon</styleUrl>
<Point>
<coordinates>
-77.8333,-10.1
</coordinates>
</Point>
</Placemark>
<Placemark>
<name>
    T (local)    L (local)    </name>
<styleUrl>#icon</styleUrl>
<Point>
<coordinates>
-77,-10.6556
</coordinates>
</Point>
</Placemark>
<Placemark>
<name>
    T (local)        </name>
<styleUrl>#icon</styleUrl>
<Point>
<coordinates>
-77,-11.2111
</coordinates>
</Point>
</Placemark>
<Placemark>
<name>
    T (local)        </name>
<styleUrl>#icon</styleUrl>
<Point>
<coordinates>
-77,-11.7667
</coordinates>
</Point>
</Placemark>
<Placemark>
<name>
    T (local)        </name>
<styleUrl>#icon</styleUrl>
<Point>
<coordinates>
-76.1667,-12.3222
</coordinates>
</Point>
</Placemark>
<Placemark>
<name>
    T (local)    L (local)    </name>
<styleUrl>#icon</styleUrl>
<Point>
<coordinates>
-76.1667,-12.8778
</coordinates>
</Point>
</Placemark>
<Placemark>
<name>
B (local)    T (sparse)        </name>
<styleUrl>#icon</styleUrl>
<Point>
<coordinates>
-76.1667,-13.9889
</coordinates>
</Point>
</Placemark>
<Placemark>
<name>
    T (sparse)        </name>
<styleUrl>#icon</styleUrl>
<Point>
<coordinates>
-75.3333,-13.9889
</coordinates>
</Point>
</Placemark>
<Placemark>
<name>
B (local)    T (sparse)        </name>
<styleUrl>#icon</styleUrl>
<Point>
<coordinates>
-75.3333,-14.5444
</coordinates>
</Point>
</Placemark>
<Placemark>
<name>
B (local)    T (local)        </name>
<styleUrl>#icon</styleUrl>
<Point>
<coordinates>
-74.5,-14.5444
</coordinates>
</Point>
</Placemark>
<Placemark>
<name>
B (sparse)    T (sparse)        </name>
<styleUrl>#icon</styleUrl>
<Point>
<coordinates>
-74.5,-15.1
</coordinates>
</Point>
</Placemark>
<Placemark>
<name>
B (local)    T (local)        </name>
<styleUrl>#icon</styleUrl>
<Point>
<coordinates>
-73.6667,-15.6556
</coordinates>
</Point>
</Placemark>
<Placemark>
<name>
            </name>
<styleUrl>#icon</styleUrl>
<Point>
<coordinates>
-72.8333,-15.6556
</coordinates>
</Point>
</Placemark>
<Placemark>
<name>
B (local)    T (local)        </name>
<styleUrl>#icon</styleUrl>
<Point>
<coordinates>
-72.8333,-16.2111
</coordinates>
</Point>
</Placemark>
<Placemark>
<name>
            </name>
<styleUrl>#icon</styleUrl>
<Point>
<coordinates>
-72.8333,-49.5444
</coordinates>
</Point>
</Placemark>
<Placemark>
<name>
            </name>
<styleUrl>#icon</styleUrl>
<Point>
<coordinates>
-72.8333,-50.1
</coordinates>
</Point>
</Placemark>
<Placemark>
<name>
            </name>
<styleUrl>#icon</styleUrl>
<Point>
<coordinates>
-72,12.1222
</coordinates>
</Point>
</Placemark>
<Placemark>
<name>
            </name>
<styleUrl>#icon</styleUrl>
<Point>
<coordinates>
-72,-15.6556
</coordinates>
</Point>
</Placemark>
<Placemark>
<name>
B (local)            </name>
<styleUrl>#icon</styleUrl>
<Point>
<coordinates>
-72,-16.2111
</coordinates>
</Point>
</Placemark>
<Placemark>
<name>
B (local)            </name>
<styleUrl>#icon</styleUrl>
<Point>
<coordinates>
-72,-16.7667
</coordinates>
</Point>
</Placemark>
<Placemark>
<name>
            </name>
<styleUrl>#icon</styleUrl>
<Point>
<coordinates>
-72,-48.9889
</coordinates>
</Point>
</Placemark>
<Placemark>
<name>
            </name>
<styleUrl>#icon</styleUrl>
<Point>
<coordinates>
-72,-49.5444
</coordinates>
</Point>
</Placemark>
<Placemark>
<name>
            </name>
<styleUrl>#icon</styleUrl>
<Point>
<coordinates>
-72,-50.1
</coordinates>
</Point>
</Placemark>
<Placemark>
<name>
            </name>
<styleUrl>#icon</styleUrl>
<Point>
<coordinates>
-72,-51.2111
</coordinates>
</Point>
</Placemark>
<Placemark>
<name>
            </name>
<styleUrl>#icon</styleUrl>
<Point>
<coordinates>
-72,-51.7667
</coordinates>
</Point>
</Placemark>
<Placemark>
<name>
            </name>
<styleUrl>#icon</styleUrl>
<Point>
<coordinates>
-72,-80.6556
</coordinates>
</Point>
</Placemark>
<Placemark>
<name>
            </name>
<styleUrl>#icon</styleUrl>
<Point>
<coordinates>
-71.1667,12.1222
</coordinates>
</Point>
</Placemark>
<Placemark>
<name>
B (local)    T (local)        </name>
<styleUrl>#icon</styleUrl>
<Point>
<coordinates>
-71.1667,11.0111
</coordinates>
</Point>
</Placemark>
<Placemark>
<name>
    T (local)        </name>
<styleUrl>#icon</styleUrl>
<Point>
<coordinates>
-71.1667,-16.7667
</coordinates>
</Point>
</Placemark>
<Placemark>
<name>
            S (local)</name>
<styleUrl>#icon</styleUrl>
<Point>
<coordinates>
-71.1667,-17.3222
</coordinates>
</Point>
</Placemark>
<Placemark>
<name>
    T (local)        </name>
<styleUrl>#icon</styleUrl>
<Point>
<coordinates>
-71.1667,-28.4333
</coordinates>
</Point>
</Placemark>
<Placemark>
<name>
    T (local)        </name>
<styleUrl>#icon</styleUrl>
<Point>
<coordinates>
-71.1667,-28.9889
</coordinates>
</Point>
</Placemark>
<Placemark>
<name>
            </name>
<styleUrl>#icon</styleUrl>
<Point>
<coordinates>
-71.1667,-29.5444
</coordinates>
</Point>
</Placemark>
<Placemark>
<name>
            </name>
<styleUrl>#icon</styleUrl>
<Point>
<coordinates>
-71.1667,-30.1
</coordinates>
</Point>
</Placemark>
<Placemark>
<name>
            </name>
<styleUrl>#icon</styleUrl>
<Point>
<coordinates>
-71.1667,-30.6556
</coordinates>
</Point>
</Placemark>
<Placemark>
<name>
    T (local)        </name>
<styleUrl>#icon</styleUrl>
<Point>
<coordinates>
-71.1667,-31.2111
</coordinates>
</Point>
</Placemark>
<Placemark>
<name>
    T (local)        </name>
<styleUrl>#icon</styleUrl>
<Point>
<coordinates>
-71.1667,-31.7667
</coordinates>
</Point>
</Placemark>
<Placemark>
<name>
            </name>
<styleUrl>#icon</styleUrl>
<Point>
<coordinates>
-71.1667,-46.2111
</coordinates>
</Point>
</Placemark>
<Placemark>
<name>
            </name>
<styleUrl>#icon</styleUrl>
<Point>
<coordinates>
-71.1667,-46.7667
</coordinates>
</Point>
</Placemark>
<Placemark>
<name>
            </name>
<styleUrl>#icon</styleUrl>
<Point>
<coordinates>
-71.1667,-47.3222
</coordinates>
</Point>
</Placemark>
<Placemark>
<name>
            </name>
<styleUrl>#icon</styleUrl>
<Point>
<coordinates>
-71.1667,-47.8778
</coordinates>
</Point>
</Placemark>
<Placemark>
<name>
            </name>
<styleUrl>#icon</styleUrl>
<Point>
<coordinates>
-71.1667,-48.4333
</coordinates>
</Point>
</Placemark>
<Placemark>
<name>
            </name>
<styleUrl>#icon</styleUrl>
<Point>
<coordinates>
-71.1667,-48.9889
</coordinates>
</Point>
</Placemark>
<Placemark>
<name>
            </name>
<styleUrl>#icon</styleUrl>
<Point>
<coordinates>
-71.1667,-49.5444
</coordinates>
</Point>
</Placemark>
<Placemark>
<name>
            </name>
<styleUrl>#icon</styleUrl>
<Point>
<coordinates>
-71.1667,-50.1
</coordinates>
</Point>
</Placemark>
<Placemark>
<name>
            </name>
<styleUrl>#icon</styleUrl>
<Point>
<coordinates>
-71.1667,-50.6556
</coordinates>
</Point>
</Placemark>
<Placemark>
<name>
            </name>
<styleUrl>#icon</styleUrl>
<Point>
<coordinates>
-71.1667,-51.2111
</coordinates>
</Point>
</Placemark>
<Placemark>
<name>
            </name>
<styleUrl>#icon</styleUrl>
<Point>
<coordinates>
-71.1667,-51.7667
</coordinates>
</Point>
</Placemark>
<Placemark>
<name>
            </name>
<styleUrl>#icon</styleUrl>
<Point>
<coordinates>
-71.1667,-52.3222
</coordinates>
</Point>
</Placemark>
<Placemark>
<name>
            </name>
<styleUrl>#icon</styleUrl>
<Point>
<coordinates>
-70.3333,-17.3222
</coordinates>
</Point>
</Placemark>
<Placemark>
<name>
            </name>
<styleUrl>#icon</styleUrl>
<Point>
<coordinates>
-70.3333,-17.8778
</coordinates>
</Point>
</Placemark>
<Placemark>
<name>
            </name>
<styleUrl>#icon</styleUrl>
<Point>
<coordinates>
-70.3333,-22.8778
</coordinates>
</Point>
</Placemark>
<Placemark>
<name>
            </name>
<styleUrl>#icon</styleUrl>
<Point>
<coordinates>
-70.3333,-23.4333
</coordinates>
</Point>
</Placemark>
<Placemark>
<name>
            </name>
<styleUrl>#icon</styleUrl>
<Point>
<coordinates>
-70.3333,-23.9889
</coordinates>
</Point>
</Placemark>
<Placemark>
<name>
            </name>
<styleUrl>#icon</styleUrl>
<Point>
<coordinates>
-70.3333,-24.5444
</coordinates>
</Point>
</Placemark>
<Placemark>
<name>
            </name>
<styleUrl>#icon</styleUrl>
<Point>
<coordinates>
-70.3333,-25.1
</coordinates>
</Point>
</Placemark>
<Placemark>
<name>
            </name>
<styleUrl>#icon</styleUrl>
<Point>
<coordinates>
-70.3333,-25.6556
</coordinates>
</Point>
</Placemark>
<Placemark>
<name>
    T (local)        </name>
<styleUrl>#icon</styleUrl>
<Point>
<coordinates>
-70.3333,-26.2111
</coordinates>
</Point>
</Placemark>
<Placemark>
<name>
B (local)    T (sparse)    L (sparse)    </name>
<styleUrl>#icon</styleUrl>
<Point>
<coordinates>
-70.3333,-26.7667
</coordinates>
</Point>
</Placemark>
<Placemark>
<name>
    T (local)    L (local)    </name>
<styleUrl>#icon</styleUrl>
<Point>
<coordinates>
-70.3333,-27.3222
</coordinates>
</Point>
</Placemark>
<Placemark>
<name>
    T (local)        </name>
<styleUrl>#icon</styleUrl>
<Point>
<coordinates>
-70.3333,-27.8778
</coordinates>
</Point>
</Placemark>
<Placemark>
<name>
            </name>
<styleUrl>#icon</styleUrl>
<Point>
<coordinates>
-70.3333,-28.4333
</coordinates>
</Point>
</Placemark>
<Placemark>
<name>
            </name>
<styleUrl>#icon</styleUrl>
<Point>
<coordinates>
-70.3333,-39.5444
</coordinates>
</Point>
</Placemark>
<Placemark>
<name>
            </name>
<styleUrl>#icon</styleUrl>
<Point>
<coordinates>
-70.3333,-43.4333
</coordinates>
</Point>
</Placemark>
<Placemark>
<name>
            </name>
<styleUrl>#icon</styleUrl>
<Point>
<coordinates>
-70.3333,-43.9889
</coordinates>
</Point>
</Placemark>
<Placemark>
<name>
            </name>
<styleUrl>#icon</styleUrl>
<Point>
<coordinates>
-70.3333,-44.5444
</coordinates>
</Point>
</Placemark>
<Placemark>
<name>
            </name>
<styleUrl>#icon</styleUrl>
<Point>
<coordinates>
-70.3333,-45.1
</coordinates>
</Point>
</Placemark>
<Placemark>
<name>
            </name>
<styleUrl>#icon</styleUrl>
<Point>
<coordinates>
-70.3333,-45.6556
</coordinates>
</Point>
</Placemark>
<Placemark>
<name>
            </name>
<styleUrl>#icon</styleUrl>
<Point>
<coordinates>
-70.3333,-46.2111
</coordinates>
</Point>
</Placemark>
<Placemark>
<name>
            </name>
<styleUrl>#icon</styleUrl>
<Point>
<coordinates>
-70.3333,-46.7667
</coordinates>
</Point>
</Placemark>
<Placemark>
<name>
            </name>
<styleUrl>#icon</styleUrl>
<Point>
<coordinates>
-70.3333,-47.3222
</coordinates>
</Point>
</Placemark>
<Placemark>
<name>
            </name>
<styleUrl>#icon</styleUrl>
<Point>
<coordinates>
-70.3333,-47.8778
</coordinates>
</Point>
</Placemark>
<Placemark>
<name>
            </name>
<styleUrl>#icon</styleUrl>
<Point>
<coordinates>
-70.3333,-48.4333
</coordinates>
</Point>
</Placemark>
<Placemark>
<name>
            </name>
<styleUrl>#icon</styleUrl>
<Point>
<coordinates>
-70.3333,-48.9889
</coordinates>
</Point>
</Placemark>
<Placemark>
<name>
            </name>
<styleUrl>#icon</styleUrl>
<Point>
<coordinates>
-70.3333,-49.5444
</coordinates>
</Point>
</Placemark>
<Placemark>
<name>
            </name>
<styleUrl>#icon</styleUrl>
<Point>
<coordinates>
-70.3333,-50.1
</coordinates>
</Point>
</Placemark>
<Placemark>
<name>
            </name>
<styleUrl>#icon</styleUrl>
<Point>
<coordinates>
-70.3333,-50.6556
</coordinates>
</Point>
</Placemark>
<Placemark>
<name>
            </name>
<styleUrl>#icon</styleUrl>
<Point>
<coordinates>
-70.3333,-51.2111
</coordinates>
</Point>
</Placemark>
<Placemark>
<name>
            </name>
<styleUrl>#icon</styleUrl>
<Point>
<coordinates>
-70.3333,-51.7667
</coordinates>
</Point>
</Placemark>
<Placemark>
<name>
            </name>
<styleUrl>#icon</styleUrl>
<Point>
<coordinates>
-70.3333,-52.3222
</coordinates>
</Point>
</Placemark>
<Placemark>
<name>
    T (local)        </name>
<styleUrl>#icon</styleUrl>
<Point>
<coordinates>
-69.5,11.5667
</coordinates>
</Point>
</Placemark>
<Placemark>
<name>
            </name>
<styleUrl>#icon</styleUrl>
<Point>
<coordinates>
-69.5,11.0111
</coordinates>
</Point>
</Placemark>
<Placemark>
<name>
            </name>
<styleUrl>#icon</styleUrl>
<Point>
<coordinates>
-69.5,10.4556
</coordinates>
</Point>
</Placemark>
<Placemark>
<name>
            </name>
<styleUrl>#icon</styleUrl>
<Point>
<coordinates>
-69.5,-17.3222
</coordinates>
</Point>
</Placemark>
<Placemark>
<name>
            </name>
<styleUrl>#icon</styleUrl>
<Point>
<coordinates>
-69.5,-17.8778
</coordinates>
</Point>
</Placemark>
<Placemark>
<name>
            </name>
<styleUrl>#icon</styleUrl>
<Point>
<coordinates>
-69.5,-18.4333
</coordinates>
</Point>
</Placemark>
<Placemark>
<name>
            </name>
<styleUrl>#icon</styleUrl>
<Point>
<coordinates>
-69.5,-18.9889
</coordinates>
</Point>
</Placemark>
<Placemark>
<name>
            </name>
<styleUrl>#icon</styleUrl>
<Point>
<coordinates>
-69.5,-19.5444
</coordinates>
</Point>
</Placemark>
<Placemark>
<name>
    T (local)    L (local)    </name>
<styleUrl>#icon</styleUrl>
<Point>
<coordinates>
-69.5,-20.1
</coordinates>
</Point>
</Placemark>
<Placemark>
<name>
B (local)    T (local)        </name>
<styleUrl>#icon</styleUrl>
<Point>
<coordinates>
-69.5,-20.6556
</coordinates>
</Point>
</Placemark>
<Placemark>
<name>
            </name>
<styleUrl>#icon</styleUrl>
<Point>
<coordinates>
-69.5,-21.2111
</coordinates>
</Point>
</Placemark>
<Placemark>
<name>
            </name>
<styleUrl>#icon</styleUrl>
<Point>
<coordinates>
-69.5,-21.7667
</coordinates>
</Point>
</Placemark>
<Placemark>
<name>
            </name>
<styleUrl>#icon</styleUrl>
<Point>
<coordinates>
-69.5,-22.3222
</coordinates>
</Point>
</Placemark>
<Placemark>
<name>
            </name>
<styleUrl>#icon</styleUrl>
<Point>
<coordinates>
-69.5,-22.8778
</coordinates>
</Point>
</Placemark>
<Placemark>
<name>
            </name>
<styleUrl>#icon</styleUrl>
<Point>
<coordinates>
-69.5,-23.4333
</coordinates>
</Point>
</Placemark>
<Placemark>
<name>
            </name>
<styleUrl>#icon</styleUrl>
<Point>
<coordinates>
-69.5,-23.9889
</coordinates>
</Point>
</Placemark>
<Placemark>
<name>
            </name>
<styleUrl>#icon</styleUrl>
<Point>
<coordinates>
-69.5,-24.5444
</coordinates>
</Point>
</Placemark>
<Placemark>
<name>
            </name>
<styleUrl>#icon</styleUrl>
<Point>
<coordinates>
-69.5,-25.1
</coordinates>
</Point>
</Placemark>
<Placemark>
<name>
            </name>
<styleUrl>#icon</styleUrl>
<Point>
<coordinates>
-69.5,-25.6556
</coordinates>
</Point>
</Placemark>
<Placemark>
<name>
            </name>
<styleUrl>#icon</styleUrl>
<Point>
<coordinates>
-69.5,-26.2111
</coordinates>
</Point>
</Placemark>
<Placemark>
<name>
            </name>
<styleUrl>#icon</styleUrl>
<Point>
<coordinates>
-69.5,-26.7667
</coordinates>
</Point>
</Placemark>
<Placemark>
<name>
            </name>
<styleUrl>#icon</styleUrl>
<Point>
<coordinates>
-69.5,-27.3222
</coordinates>
</Point>
</Placemark>
<Placemark>
<name>
            </name>
<styleUrl>#icon</styleUrl>
<Point>
<coordinates>
-69.5,-27.8778
</coordinates>
</Point>
</Placemark>
<Placemark>
<name>
            </name>
<styleUrl>#icon</styleUrl>
<Point>
<coordinates>
-69.5,-28.4333
</coordinates>
</Point>
</Placemark>
<Placemark>
<name>
            </name>
<styleUrl>#icon</styleUrl>
<Point>
<coordinates>
-69.5,-28.9889
</coordinates>
</Point>
</Placemark>
<Placemark>
<name>
            </name>
<styleUrl>#icon</styleUrl>
<Point>
<coordinates>
-69.5,-29.5444
</coordinates>
</Point>
</Placemark>
<Placemark>
<name>
            </name>
<styleUrl>#icon</styleUrl>
<Point>
<coordinates>
-69.5,-30.6556
</coordinates>
</Point>
</Placemark>
<Placemark>
<name>
            </name>
<styleUrl>#icon</styleUrl>
<Point>
<coordinates>
-69.5,-31.2111
</coordinates>
</Point>
</Placemark>
<Placemark>
<name>
            </name>
<styleUrl>#icon</styleUrl>
<Point>
<coordinates>
-69.5,-31.7667
</coordinates>
</Point>
</Placemark>
<Placemark>
<name>
            </name>
<styleUrl>#icon</styleUrl>
<Point>
<coordinates>
-69.5,-35.1
</coordinates>
</Point>
</Placemark>
<Placemark>
<name>
            </name>
<styleUrl>#icon</styleUrl>
<Point>
<coordinates>
-69.5,-35.6556
</coordinates>
</Point>
</Placemark>
<Placemark>
<name>
            </name>
<styleUrl>#icon</styleUrl>
<Point>
<coordinates>
-69.5,-36.2111
</coordinates>
</Point>
</Placemark>
<Placemark>
<name>
            </name>
<styleUrl>#icon</styleUrl>
<Point>
<coordinates>
-69.5,-37.3222
</coordinates>
</Point>
</Placemark>
<Placemark>
<name>
            </name>
<styleUrl>#icon</styleUrl>
<Point>
<coordinates>
-69.5,-37.8778
</coordinates>
</Point>
</Placemark>
<Placemark>
<name>
            </name>
<styleUrl>#icon</styleUrl>
<Point>
<coordinates>
-69.5,-38.4333
</coordinates>
</Point>
</Placemark>
<Placemark>
<name>
            </name>
<styleUrl>#icon</styleUrl>
<Point>
<coordinates>
-69.5,-38.9889
</coordinates>
</Point>
</Placemark>
<Placemark>
<name>
            </name>
<styleUrl>#icon</styleUrl>
<Point>
<coordinates>
-69.5,-39.5444
</coordinates>
</Point>
</Placemark>
<Placemark>
<name>
            </name>
<styleUrl>#icon</styleUrl>
<Point>
<coordinates>
-69.5,-40.1
</coordinates>
</Point>
</Placemark>
<Placemark>
<name>
            </name>
<styleUrl>#icon</styleUrl>
<Point>
<coordinates>
-69.5,-40.6556
</coordinates>
</Point>
</Placemark>
<Placemark>
<name>
            </name>
<styleUrl>#icon</styleUrl>
<Point>
<coordinates>
-69.5,-41.2111
</coordinates>
</Point>
</Placemark>
<Placemark>
<name>
            </name>
<styleUrl>#icon</styleUrl>
<Point>
<coordinates>
-69.5,-41.7667
</coordinates>
</Point>
</Placemark>
<Placemark>
<name>
            </name>
<styleUrl>#icon</styleUrl>
<Point>
<coordinates>
-69.5,-42.3222
</coordinates>
</Point>
</Placemark>
<Placemark>
<name>
            </name>
<styleUrl>#icon</styleUrl>
<Point>
<coordinates>
-69.5,-42.8778
</coordinates>
</Point>
</Placemark>
<Placemark>
<name>
            </name>
<styleUrl>#icon</styleUrl>
<Point>
<coordinates>
-69.5,-43.4333
</coordinates>
</Point>
</Placemark>
<Placemark>
<name>
            </name>
<styleUrl>#icon</styleUrl>
<Point>
<coordinates>
-69.5,-43.9889
</coordinates>
</Point>
</Placemark>
<Placemark>
<name>
            </name>
<styleUrl>#icon</styleUrl>
<Point>
<coordinates>
-69.5,-44.5444
</coordinates>
</Point>
</Placemark>
<Placemark>
<name>
            </name>
<styleUrl>#icon</styleUrl>
<Point>
<coordinates>
-69.5,-45.1
</coordinates>
</Point>
</Placemark>
<Placemark>
<name>
            </name>
<styleUrl>#icon</styleUrl>
<Point>
<coordinates>
-69.5,-45.6556
</coordinates>
</Point>
</Placemark>
<Placemark>
<name>
            </name>
<styleUrl>#icon</styleUrl>
<Point>
<coordinates>
-69.5,-46.2111
</coordinates>
</Point>
</Placemark>
<Placemark>
<name>
            </name>
<styleUrl>#icon</styleUrl>
<Point>
<coordinates>
-69.5,-46.7667
</coordinates>
</Point>
</Placemark>
<Placemark>
<name>
            </name>
<styleUrl>#icon</styleUrl>
<Point>
<coordinates>
-69.5,-47.3222
</coordinates>
</Point>
</Placemark>
<Placemark>
<name>
            </name>
<styleUrl>#icon</styleUrl>
<Point>
<coordinates>
-69.5,-47.8778
</coordinates>
</Point>
</Placemark>
<Placemark>
<name>
            </name>
<styleUrl>#icon</styleUrl>
<Point>
<coordinates>
-69.5,-48.4333
</coordinates>
</Point>
</Placemark>
<Placemark>
<name>
            </name>
<styleUrl>#icon</styleUrl>
<Point>
<coordinates>
-69.5,-48.9889
</coordinates>
</Point>
</Placemark>
<Placemark>
<name>
            </name>
<styleUrl>#icon</styleUrl>
<Point>
<coordinates>
-69.5,-49.5444
</coordinates>
</Point>
</Placemark>
<Placemark>
<name>
            </name>
<styleUrl>#icon</styleUrl>
<Point>
<coordinates>
-69.5,-50.1
</coordinates>
</Point>
</Placemark>
<Placemark>
<name>
            </name>
<styleUrl>#icon</styleUrl>
<Point>
<coordinates>
-69.5,-50.6556
</coordinates>
</Point>
</Placemark>
<Placemark>
<name>
            </name>
<styleUrl>#icon</styleUrl>
<Point>
<coordinates>
-69.5,-51.2111
</coordinates>
</Point>
</Placemark>
<Placemark>
<name>
            </name>
<styleUrl>#icon</styleUrl>
<Point>
<coordinates>
-69.5,-51.7667
</coordinates>
</Point>
</Placemark>
<Placemark>
<name>
            </name>
<styleUrl>#icon</styleUrl>
<Point>
<coordinates>
-69.5,-52.3222
</coordinates>
</Point>
</Placemark>
<Placemark>
<name>
            </name>
<styleUrl>#icon</styleUrl>
<Point>
<coordinates>
-68.6667,-17.3222
</coordinates>
</Point>
</Placemark>
<Placemark>
<name>
            </name>
<styleUrl>#icon</styleUrl>
<Point>
<coordinates>
-68.6667,-17.8778
</coordinates>
</Point>
</Placemark>
<Placemark>
<name>
            </name>
<styleUrl>#icon</styleUrl>
<Point>
<coordinates>
-68.6667,-18.4333
</coordinates>
</Point>
</Placemark>
<Placemark>
<name>
            </name>
<styleUrl>#icon</styleUrl>
<Point>
<coordinates>
-68.6667,-18.9889
</coordinates>
</Point>
</Placemark>
<Placemark>
<name>
            </name>
<styleUrl>#icon</styleUrl>
<Point>
<coordinates>
-68.6667,-19.5444
</coordinates>
</Point>
</Placemark>
<Placemark>
<name>
            </name>
<styleUrl>#icon</styleUrl>
<Point>
<coordinates>
-68.6667,-20.1
</coordinates>
</Point>
</Placemark>
<Placemark>
<name>
            </name>
<styleUrl>#icon</styleUrl>
<Point>
<coordinates>
-68.6667,-20.6556
</coordinates>
</Point>
</Placemark>
<Placemark>
<name>
            </name>
<styleUrl>#icon</styleUrl>
<Point>
<coordinates>
-68.6667,-21.2111
</coordinates>
</Point>
</Placemark>
<Placemark>
<name>
            </name>
<styleUrl>#icon</styleUrl>
<Point>
<coordinates>
-68.6667,-21.7667
</coordinates>
</Point>
</Placemark>
<Placemark>
<name>
            </name>
<styleUrl>#icon</styleUrl>
<Point>
<coordinates>
-68.6667,-22.3222
</coordinates>
</Point>
</Placemark>
<Placemark>
<name>
            </name>
<styleUrl>#icon</styleUrl>
<Point>
<coordinates>
-68.6667,-22.8778
</coordinates>
</Point>
</Placemark>
<Placemark>
<name>
            </name>
<styleUrl>#icon</styleUrl>
<Point>
<coordinates>
-68.6667,-23.4333
</coordinates>
</Point>
</Placemark>
<Placemark>
<name>
            </name>
<styleUrl>#icon</styleUrl>
<Point>
<coordinates>
-68.6667,-23.9889
</coordinates>
</Point>
</Placemark>
<Placemark>
<name>
            </name>
<styleUrl>#icon</styleUrl>
<Point>
<coordinates>
-68.6667,-24.5444
</coordinates>
</Point>
</Placemark>
<Placemark>
<name>
            </name>
<styleUrl>#icon</styleUrl>
<Point>
<coordinates>
-68.6667,-25.1
</coordinates>
</Point>
</Placemark>
<Placemark>
<name>
            </name>
<styleUrl>#icon</styleUrl>
<Point>
<coordinates>
-68.6667,-25.6556
</coordinates>
</Point>
</Placemark>
<Placemark>
<name>
            </name>
<styleUrl>#icon</styleUrl>
<Point>
<coordinates>
-68.6667,-26.2111
</coordinates>
</Point>
</Placemark>
<Placemark>
<name>
            </name>
<styleUrl>#icon</styleUrl>
<Point>
<coordinates>
-68.6667,-26.7667
</coordinates>
</Point>
</Placemark>
<Placemark>
<name>
            </name>
<styleUrl>#icon</styleUrl>
<Point>
<coordinates>
-68.6667,-27.3222
</coordinates>
</Point>
</Placemark>
<Placemark>
<name>
            </name>
<styleUrl>#icon</styleUrl>
<Point>
<coordinates>
-68.6667,-27.8778
</coordinates>
</Point>
</Placemark>
<Placemark>
<name>
            </name>
<styleUrl>#icon</styleUrl>
<Point>
<coordinates>
-68.6667,-28.4333
</coordinates>
</Point>
</Placemark>
<Placemark>
<name>
            </name>
<styleUrl>#icon</styleUrl>
<Point>
<coordinates>
-68.6667,-28.9889
</coordinates>
</Point>
</Placemark>
<Placemark>
<name>
            </name>
<styleUrl>#icon</styleUrl>
<Point>
<coordinates>
-68.6667,-29.5444
</coordinates>
</Point>
</Placemark>
<Placemark>
<name>
            </name>
<styleUrl>#icon</styleUrl>
<Point>
<coordinates>
-68.6667,-30.1
</coordinates>
</Point>
</Placemark>
<Placemark>
<name>
            </name>
<styleUrl>#icon</styleUrl>
<Point>
<coordinates>
-68.6667,-30.6556
</coordinates>
</Point>
</Placemark>
<Placemark>
<name>
            </name>
<styleUrl>#icon</styleUrl>
<Point>
<coordinates>
-68.6667,-31.2111
</coordinates>
</Point>
</Placemark>
<Placemark>
<name>
            </name>
<styleUrl>#icon</styleUrl>
<Point>
<coordinates>
-68.6667,-31.7667
</coordinates>
</Point>
</Placemark>
<Placemark>
<name>
            </name>
<styleUrl>#icon</styleUrl>
<Point>
<coordinates>
-68.6667,-32.3222
</coordinates>
</Point>
</Placemark>
<Placemark>
<name>
            </name>
<styleUrl>#icon</styleUrl>
<Point>
<coordinates>
-68.6667,-32.8778
</coordinates>
</Point>
</Placemark>
<Placemark>
<name>
            </name>
<styleUrl>#icon</styleUrl>
<Point>
<coordinates>
-68.6667,-33.4333
</coordinates>
</Point>
</Placemark>
<Placemark>
<name>
            </name>
<styleUrl>#icon</styleUrl>
<Point>
<coordinates>
-68.6667,-33.9889
</coordinates>
</Point>
</Placemark>
<Placemark>
<name>
            </name>
<styleUrl>#icon</styleUrl>
<Point>
<coordinates>
-68.6667,-34.5444
</coordinates>
</Point>
</Placemark>
<Placemark>
<name>
B (local)    T (local)        </name>
<styleUrl>#icon</styleUrl>
<Point>
<coordinates>
-68.6667,-35.1
</coordinates>
</Point>
</Placemark>
<Placemark>
<name>
            </name>
<styleUrl>#icon</styleUrl>
<Point>
<coordinates>
-68.6667,-35.6556
</coordinates>
</Point>
</Placemark>
<Placemark>
<name>
            </name>
<styleUrl>#icon</styleUrl>
<Point>
<coordinates>
-68.6667,-36.2111
</coordinates>
</Point>
</Placemark>
<Placemark>
<name>
            </name>
<styleUrl>#icon</styleUrl>
<Point>
<coordinates>
-68.6667,-36.7667
</coordinates>
</Point>
</Placemark>
<Placemark>
<name>
            </name>
<styleUrl>#icon</styleUrl>
<Point>
<coordinates>
-68.6667,-37.3222
</coordinates>
</Point>
</Placemark>
<Placemark>
<name>
            </name>
<styleUrl>#icon</styleUrl>
<Point>
<coordinates>
-68.6667,-37.8778
</coordinates>
</Point>
</Placemark>
<Placemark>
<name>
            </name>
<styleUrl>#icon</styleUrl>
<Point>
<coordinates>
-68.6667,-38.4333
</coordinates>
</Point>
</Placemark>
<Placemark>
<name>
            </name>
<styleUrl>#icon</styleUrl>
<Point>
<coordinates>
-68.6667,-38.9889
</coordinates>
</Point>
</Placemark>
<Placemark>
<name>
            </name>
<styleUrl>#icon</styleUrl>
<Point>
<coordinates>
-68.6667,-39.5444
</coordinates>
</Point>
</Placemark>
<Placemark>
<name>
            </name>
<styleUrl>#icon</styleUrl>
<Point>
<coordinates>
-68.6667,-40.1
</coordinates>
</Point>
</Placemark>
<Placemark>
<name>
            </name>
<styleUrl>#icon</styleUrl>
<Point>
<coordinates>
-68.6667,-40.6556
</coordinates>
</Point>
</Placemark>
<Placemark>
<name>
            </name>
<styleUrl>#icon</styleUrl>
<Point>
<coordinates>
-68.6667,-41.2111
</coordinates>
</Point>
</Placemark>
<Placemark>
<name>
            </name>
<styleUrl>#icon</styleUrl>
<Point>
<coordinates>
-68.6667,-41.7667
</coordinates>
</Point>
</Placemark>
<Placemark>
<name>
            </name>
<styleUrl>#icon</styleUrl>
<Point>
<coordinates>
-68.6667,-42.3222
</coordinates>
</Point>
</Placemark>
<Placemark>
<name>
            </name>
<styleUrl>#icon</styleUrl>
<Point>
<coordinates>
-68.6667,-42.8778
</coordinates>
</Point>
</Placemark>
<Placemark>
<name>
            </name>
<styleUrl>#icon</styleUrl>
<Point>
<coordinates>
-68.6667,-43.4333
</coordinates>
</Point>
</Placemark>
<Placemark>
<name>
            </name>
<styleUrl>#icon</styleUrl>
<Point>
<coordinates>
-68.6667,-43.9889
</coordinates>
</Point>
</Placemark>
<Placemark>
<name>
            </name>
<styleUrl>#icon</styleUrl>
<Point>
<coordinates>
-68.6667,-44.5444
</coordinates>
</Point>
</Placemark>
<Placemark>
<name>
            </name>
<styleUrl>#icon</styleUrl>
<Point>
<coordinates>
-68.6667,-45.1
</coordinates>
</Point>
</Placemark>
<Placemark>
<name>
            </name>
<styleUrl>#icon</styleUrl>
<Point>
<coordinates>
-68.6667,-45.6556
</coordinates>
</Point>
</Placemark>
<Placemark>
<name>
            </name>
<styleUrl>#icon</styleUrl>
<Point>
<coordinates>
-68.6667,-46.2111
</coordinates>
</Point>
</Placemark>
<Placemark>
<name>
            </name>
<styleUrl>#icon</styleUrl>
<Point>
<coordinates>
-68.6667,-46.7667
</coordinates>
</Point>
</Placemark>
<Placemark>
<name>
            </name>
<styleUrl>#icon</styleUrl>
<Point>
<coordinates>
-68.6667,-47.3222
</coordinates>
</Point>
</Placemark>
<Placemark>
<name>
            </name>
<styleUrl>#icon</styleUrl>
<Point>
<coordinates>
-68.6667,-47.8778
</coordinates>
</Point>
</Placemark>
<Placemark>
<name>
            </name>
<styleUrl>#icon</styleUrl>
<Point>
<coordinates>
-68.6667,-48.4333
</coordinates>
</Point>
</Placemark>
<Placemark>
<name>
            </name>
<styleUrl>#icon</styleUrl>
<Point>
<coordinates>
-68.6667,-48.9889
</coordinates>
</Point>
</Placemark>
<Placemark>
<name>
            </name>
<styleUrl>#icon</styleUrl>
<Point>
<coordinates>
-68.6667,-49.5444
</coordinates>
</Point>
</Placemark>
<Placemark>
<name>
            </name>
<styleUrl>#icon</styleUrl>
<Point>
<coordinates>
-68.6667,-50.1
</coordinates>
</Point>
</Placemark>
<Placemark>
<name>
            </name>
<styleUrl>#icon</styleUrl>
<Point>
<coordinates>
-68.6667,-52.8778
</coordinates>
</Point>
</Placemark>
<Placemark>
<name>
            </name>
<styleUrl>#icon</styleUrl>
<Point>
<coordinates>
-68.6667,-53.4333
</coordinates>
</Point>
</Placemark>
<Placemark>
<name>
            </name>
<styleUrl>#icon</styleUrl>
<Point>
<coordinates>
-68.6667,-80.6556
</coordinates>
</Point>
</Placemark>
<Placemark>
<name>
            </name>
<styleUrl>#icon</styleUrl>
<Point>
<coordinates>
-67.8333,-17.3222
</coordinates>
</Point>
</Placemark>
<Placemark>
<name>
            </name>
<styleUrl>#icon</styleUrl>
<Point>
<coordinates>
-67.8333,-17.8778
</coordinates>
</Point>
</Placemark>
<Placemark>
<name>
            </name>
<styleUrl>#icon</styleUrl>
<Point>
<coordinates>
-67.8333,-18.4333
</coordinates>
</Point>
</Placemark>
<Placemark>
<name>
            </name>
<styleUrl>#icon</styleUrl>
<Point>
<coordinates>
-67.8333,-18.9889
</coordinates>
</Point>
</Placemark>
<Placemark>
<name>
            </name>
<styleUrl>#icon</styleUrl>
<Point>
<coordinates>
-67.8333,-19.5444
</coordinates>
</Point>
</Placemark>
<Placemark>
<name>
            </name>
<styleUrl>#icon</styleUrl>
<Point>
<coordinates>
-67.8333,-20.1
</coordinates>
</Point>
</Placemark>
<Placemark>
<name>
            </name>
<styleUrl>#icon</styleUrl>
<Point>
<coordinates>
-67.8333,-20.6556
</coordinates>
</Point>
</Placemark>
<Placemark>
<name>
            </name>
<styleUrl>#icon</styleUrl>
<Point>
<coordinates>
-67.8333,-21.2111
</coordinates>
</Point>
</Placemark>
<Placemark>
<name>
            </name>
<styleUrl>#icon</styleUrl>
<Point>
<coordinates>
-67.8333,-21.7667
</coordinates>
</Point>
</Placemark>
<Placemark>
<name>
            </name>
<styleUrl>#icon</styleUrl>
<Point>
<coordinates>
-67.8333,-22.3222
</coordinates>
</Point>
</Placemark>
<Placemark>
<name>
            </name>
<styleUrl>#icon</styleUrl>
<Point>
<coordinates>
-67.8333,-22.8778
</coordinates>
</Point>
</Placemark>
<Placemark>
<name>
            </name>
<styleUrl>#icon</styleUrl>
<Point>
<coordinates>
-67.8333,-23.4333
</coordinates>
</Point>
</Placemark>
<Placemark>
<name>
            </name>
<styleUrl>#icon</styleUrl>
<Point>
<coordinates>
-67.8333,-23.9889
</coordinates>
</Point>
</Placemark>
<Placemark>
<name>
            </name>
<styleUrl>#icon</styleUrl>
<Point>
<coordinates>
-67.8333,-24.5444
</coordinates>
</Point>
</Placemark>
<Placemark>
<name>
            </name>
<styleUrl>#icon</styleUrl>
<Point>
<coordinates>
-67.8333,-25.1
</coordinates>
</Point>
</Placemark>
<Placemark>
<name>
            </name>
<styleUrl>#icon</styleUrl>
<Point>
<coordinates>
-67.8333,-25.6556
</coordinates>
</Point>
</Placemark>
<Placemark>
<name>
            </name>
<styleUrl>#icon</styleUrl>
<Point>
<coordinates>
-67.8333,-26.2111
</coordinates>
</Point>
</Placemark>
<Placemark>
<name>
            </name>
<styleUrl>#icon</styleUrl>
<Point>
<coordinates>
-67.8333,-26.7667
</coordinates>
</Point>
</Placemark>
<Placemark>
<name>
B (local)    T (local)        </name>
<styleUrl>#icon</styleUrl>
<Point>
<coordinates>
-67.8333,-27.3222
</coordinates>
</Point>
</Placemark>
<Placemark>
<name>
            </name>
<styleUrl>#icon</styleUrl>
<Point>
<coordinates>
-67.8333,-27.8778
</coordinates>
</Point>
</Placemark>
<Placemark>
<name>
            </name>
<styleUrl>#icon</styleUrl>
<Point>
<coordinates>
-67.8333,-28.4333
</coordinates>
</Point>
</Placemark>
<Placemark>
<name>
            </name>
<styleUrl>#icon</styleUrl>
<Point>
<coordinates>
-67.8333,-28.9889
</coordinates>
</Point>
</Placemark>
<Placemark>
<name>
            </name>
<styleUrl>#icon</styleUrl>
<Point>
<coordinates>
-67.8333,-29.5444
</coordinates>
</Point>
</Placemark>
<Placemark>
<name>
            </name>
<styleUrl>#icon</styleUrl>
<Point>
<coordinates>
-67.8333,-30.1
</coordinates>
</Point>
</Placemark>
<Placemark>
<name>
            </name>
<styleUrl>#icon</styleUrl>
<Point>
<coordinates>
-67.8333,-30.6556
</coordinates>
</Point>
</Placemark>
<Placemark>
<name>
            </name>
<styleUrl>#icon</styleUrl>
<Point>
<coordinates>
-67.8333,-31.2111
</coordinates>
</Point>
</Placemark>
<Placemark>
<name>
            </name>
<styleUrl>#icon</styleUrl>
<Point>
<coordinates>
-67.8333,-31.7667
</coordinates>
</Point>
</Placemark>
<Placemark>
<name>
            </name>
<styleUrl>#icon</styleUrl>
<Point>
<coordinates>
-67.8333,-32.3222
</coordinates>
</Point>
</Placemark>
<Placemark>
<name>
            </name>
<styleUrl>#icon</styleUrl>
<Point>
<coordinates>
-67.8333,-32.8778
</coordinates>
</Point>
</Placemark>
<Placemark>
<name>
            </name>
<styleUrl>#icon</styleUrl>
<Point>
<coordinates>
-67.8333,-33.4333
</coordinates>
</Point>
</Placemark>
<Placemark>
<name>
            </name>
<styleUrl>#icon</styleUrl>
<Point>
<coordinates>
-67.8333,-33.9889
</coordinates>
</Point>
</Placemark>
<Placemark>
<name>
            </name>
<styleUrl>#icon</styleUrl>
<Point>
<coordinates>
-67.8333,-34.5444
</coordinates>
</Point>
</Placemark>
<Placemark>
<name>
            </name>
<styleUrl>#icon</styleUrl>
<Point>
<coordinates>
-67.8333,-35.1
</coordinates>
</Point>
</Placemark>
<Placemark>
<name>
            </name>
<styleUrl>#icon</styleUrl>
<Point>
<coordinates>
-67.8333,-35.6556
</coordinates>
</Point>
</Placemark>
<Placemark>
<name>
            </name>
<styleUrl>#icon</styleUrl>
<Point>
<coordinates>
-67.8333,-36.2111
</coordinates>
</Point>
</Placemark>
<Placemark>
<name>
            </name>
<styleUrl>#icon</styleUrl>
<Point>
<coordinates>
-67.8333,-36.7667
</coordinates>
</Point>
</Placemark>
<Placemark>
<name>
            </name>
<styleUrl>#icon</styleUrl>
<Point>
<coordinates>
-67.8333,-37.3222
</coordinates>
</Point>
</Placemark>
<Placemark>
<name>
            </name>
<styleUrl>#icon</styleUrl>
<Point>
<coordinates>
-67.8333,-37.8778
</coordinates>
</Point>
</Placemark>
<Placemark>
<name>
            </name>
<styleUrl>#icon</styleUrl>
<Point>
<coordinates>
-67.8333,-38.4333
</coordinates>
</Point>
</Placemark>
<Placemark>
<name>
            </name>
<styleUrl>#icon</styleUrl>
<Point>
<coordinates>
-67.8333,-38.9889
</coordinates>
</Point>
</Placemark>
<Placemark>
<name>
            </name>
<styleUrl>#icon</styleUrl>
<Point>
<coordinates>
-67.8333,-39.5444
</coordinates>
</Point>
</Placemark>
<Placemark>
<name>
            </name>
<styleUrl>#icon</styleUrl>
<Point>
<coordinates>
-67.8333,-40.1
</coordinates>
</Point>
</Placemark>
<Placemark>
<name>
            </name>
<styleUrl>#icon</styleUrl>
<Point>
<coordinates>
-67.8333,-40.6556
</coordinates>
</Point>
</Placemark>
<Placemark>
<name>
            </name>
<styleUrl>#icon</styleUrl>
<Point>
<coordinates>
-67.8333,-41.2111
</coordinates>
</Point>
</Placemark>
<Placemark>
<name>
            </name>
<styleUrl>#icon</styleUrl>
<Point>
<coordinates>
-67.8333,-41.7667
</coordinates>
</Point>
</Placemark>
<Placemark>
<name>
            </name>
<styleUrl>#icon</styleUrl>
<Point>
<coordinates>
-67.8333,-42.3222
</coordinates>
</Point>
</Placemark>
<Placemark>
<name>
            </name>
<styleUrl>#icon</styleUrl>
<Point>
<coordinates>
-67.8333,-42.8778
</coordinates>
</Point>
</Placemark>
<Placemark>
<name>
            </name>
<styleUrl>#icon</styleUrl>
<Point>
<coordinates>
-67.8333,-43.4333
</coordinates>
</Point>
</Placemark>
<Placemark>
<name>
            </name>
<styleUrl>#icon</styleUrl>
<Point>
<coordinates>
-67.8333,-43.9889
</coordinates>
</Point>
</Placemark>
<Placemark>
<name>
            </name>
<styleUrl>#icon</styleUrl>
<Point>
<coordinates>
-67.8333,-44.5444
</coordinates>
</Point>
</Placemark>
<Placemark>
<name>
            </name>
<styleUrl>#icon</styleUrl>
<Point>
<coordinates>
-67.8333,-45.1
</coordinates>
</Point>
</Placemark>
<Placemark>
<name>
            </name>
<styleUrl>#icon</styleUrl>
<Point>
<coordinates>
-67.8333,-45.6556
</coordinates>
</Point>
</Placemark>
<Placemark>
<name>
            </name>
<styleUrl>#icon</styleUrl>
<Point>
<coordinates>
-67.8333,-46.2111
</coordinates>
</Point>
</Placemark>
<Placemark>
<name>
            </name>
<styleUrl>#icon</styleUrl>
<Point>
<coordinates>
-67.8333,-46.7667
</coordinates>
</Point>
</Placemark>
<Placemark>
<name>
            </name>
<styleUrl>#icon</styleUrl>
<Point>
<coordinates>
-67.8333,-47.3222
</coordinates>
</Point>
</Placemark>
<Placemark>
<name>
            </name>
<styleUrl>#icon</styleUrl>
<Point>
<coordinates>
-67.8333,-47.8778
</coordinates>
</Point>
</Placemark>
<Placemark>
<name>
            </name>
<styleUrl>#icon</styleUrl>
<Point>
<coordinates>
-67.8333,-48.4333
</coordinates>
</Point>
</Placemark>
<Placemark>
<name>
            </name>
<styleUrl>#icon</styleUrl>
<Point>
<coordinates>
-67.8333,-48.9889
</coordinates>
</Point>
</Placemark>
<Placemark>
<name>
            </name>
<styleUrl>#icon</styleUrl>
<Point>
<coordinates>
-67.8333,-49.5444
</coordinates>
</Point>
</Placemark>
<Placemark>
<name>
            </name>
<styleUrl>#icon</styleUrl>
<Point>
<coordinates>
-67.8333,-79.5444
</coordinates>
</Point>
</Placemark>
<Placemark>
<name>
            </name>
<styleUrl>#icon</styleUrl>
<Point>
<coordinates>
-67,-17.3222
</coordinates>
</Point>
</Placemark>
<Placemark>
<name>
            </name>
<styleUrl>#icon</styleUrl>
<Point>
<coordinates>
-67,-17.8778
</coordinates>
</Point>
</Placemark>
<Placemark>
<name>
            </name>
<styleUrl>#icon</styleUrl>
<Point>
<coordinates>
-67,-18.4333
</coordinates>
</Point>
</Placemark>
<Placemark>
<name>
            </name>
<styleUrl>#icon</styleUrl>
<Point>
<coordinates>
-67,-18.9889
</coordinates>
</Point>
</Placemark>
<Placemark>
<name>
            </name>
<styleUrl>#icon</styleUrl>
<Point>
<coordinates>
-67,-19.5444
</coordinates>
</Point>
</Placemark>
<Placemark>
<name>
            </name>
<styleUrl>#icon</styleUrl>
<Point>
<coordinates>
-67,-20.1
</coordinates>
</Point>
</Placemark>
<Placemark>
<name>
            </name>
<styleUrl>#icon</styleUrl>
<Point>
<coordinates>
-67,-20.6556
</coordinates>
</Point>
</Placemark>
<Placemark>
<name>
            </name>
<styleUrl>#icon</styleUrl>
<Point>
<coordinates>
-67,-21.2111
</coordinates>
</Point>
</Placemark>
<Placemark>
<name>
            </name>
<styleUrl>#icon</styleUrl>
<Point>
<coordinates>
-67,-21.7667
</coordinates>
</Point>
</Placemark>
<Placemark>
<name>
            </name>
<styleUrl>#icon</styleUrl>
<Point>
<coordinates>
-67,-22.3222
</coordinates>
</Point>
</Placemark>
<Placemark>
<name>
            </name>
<styleUrl>#icon</styleUrl>
<Point>
<coordinates>
-67,-22.8778
</coordinates>
</Point>
</Placemark>
<Placemark>
<name>
            </name>
<styleUrl>#icon</styleUrl>
<Point>
<coordinates>
-67,-23.4333
</coordinates>
</Point>
</Placemark>
<Placemark>
<name>
            </name>
<styleUrl>#icon</styleUrl>
<Point>
<coordinates>
-67,-23.9889
</coordinates>
</Point>
</Placemark>
<Placemark>
<name>
            </name>
<styleUrl>#icon</styleUrl>
<Point>
<coordinates>
-67,-24.5444
</coordinates>
</Point>
</Placemark>
<Placemark>
<name>
            </name>
<styleUrl>#icon</styleUrl>
<Point>
<coordinates>
-67,-25.1
</coordinates>
</Point>
</Placemark>
<Placemark>
<name>
            </name>
<styleUrl>#icon</styleUrl>
<Point>
<coordinates>
-67,-25.6556
</coordinates>
</Point>
</Placemark>
<Placemark>
<name>
            </name>
<styleUrl>#icon</styleUrl>
<Point>
<coordinates>
-67,-26.2111
</coordinates>
</Point>
</Placemark>
<Placemark>
<name>
            </name>
<styleUrl>#icon</styleUrl>
<Point>
<coordinates>
-67,-26.7667
</coordinates>
</Point>
</Placemark>
<Placemark>
<name>
            </name>
<styleUrl>#icon</styleUrl>
<Point>
<coordinates>
-67,-27.3222
</coordinates>
</Point>
</Placemark>
<Placemark>
<name>
            </name>
<styleUrl>#icon</styleUrl>
<Point>
<coordinates>
-67,-27.8778
</coordinates>
</Point>
</Placemark>
<Placemark>
<name>
            </name>
<styleUrl>#icon</styleUrl>
<Point>
<coordinates>
-67,-28.4333
</coordinates>
</Point>
</Placemark>
<Placemark>
<name>
            </name>
<styleUrl>#icon</styleUrl>
<Point>
<coordinates>
-67,-28.9889
</coordinates>
</Point>
</Placemark>
<Placemark>
<name>
            </name>
<styleUrl>#icon</styleUrl>
<Point>
<coordinates>
-67,-29.5444
</coordinates>
</Point>
</Placemark>
<Placemark>
<name>
            </name>
<styleUrl>#icon</styleUrl>
<Point>
<coordinates>
-67,-30.1
</coordinates>
</Point>
</Placemark>
<Placemark>
<name>
            </name>
<styleUrl>#icon</styleUrl>
<Point>
<coordinates>
-67,-30.6556
</coordinates>
</Point>
</Placemark>
<Placemark>
<name>
            </name>
<styleUrl>#icon</styleUrl>
<Point>
<coordinates>
-67,-31.2111
</coordinates>
</Point>
</Placemark>
<Placemark>
<name>
            </name>
<styleUrl>#icon</styleUrl>
<Point>
<coordinates>
-67,-31.7667
</coordinates>
</Point>
</Placemark>
<Placemark>
<name>
            </name>
<styleUrl>#icon</styleUrl>
<Point>
<coordinates>
-67,-32.3222
</coordinates>
</Point>
</Placemark>
<Placemark>
<name>
            </name>
<styleUrl>#icon</styleUrl>
<Point>
<coordinates>
-67,-32.8778
</coordinates>
</Point>
</Placemark>
<Placemark>
<name>
            </name>
<styleUrl>#icon</styleUrl>
<Point>
<coordinates>
-67,-33.4333
</coordinates>
</Point>
</Placemark>
<Placemark>
<name>
            </name>
<styleUrl>#icon</styleUrl>
<Point>
<coordinates>
-67,-33.9889
</coordinates>
</Point>
</Placemark>
<Placemark>
<name>
            </name>
<styleUrl>#icon</styleUrl>
<Point>
<coordinates>
-67,-34.5444
</coordinates>
</Point>
</Placemark>
<Placemark>
<name>
            </name>
<styleUrl>#icon</styleUrl>
<Point>
<coordinates>
-67,-35.1
</coordinates>
</Point>
</Placemark>
<Placemark>
<name>
            </name>
<styleUrl>#icon</styleUrl>
<Point>
<coordinates>
-67,-35.6556
</coordinates>
</Point>
</Placemark>
<Placemark>
<name>
            </name>
<styleUrl>#icon</styleUrl>
<Point>
<coordinates>
-67,-36.2111
</coordinates>
</Point>
</Placemark>
<Placemark>
<name>
            </name>
<styleUrl>#icon</styleUrl>
<Point>
<coordinates>
-67,-36.7667
</coordinates>
</Point>
</Placemark>
<Placemark>
<name>
            </name>
<styleUrl>#icon</styleUrl>
<Point>
<coordinates>
-67,-37.3222
</coordinates>
</Point>
</Placemark>
<Placemark>
<name>
            </name>
<styleUrl>#icon</styleUrl>
<Point>
<coordinates>
-67,-37.8778
</coordinates>
</Point>
</Placemark>
<Placemark>
<name>
            </name>
<styleUrl>#icon</styleUrl>
<Point>
<coordinates>
-67,-38.4333
</coordinates>
</Point>
</Placemark>
<Placemark>
<name>
            </name>
<styleUrl>#icon</styleUrl>
<Point>
<coordinates>
-67,-38.9889
</coordinates>
</Point>
</Placemark>
<Placemark>
<name>
            </name>
<styleUrl>#icon</styleUrl>
<Point>
<coordinates>
-67,-39.5444
</coordinates>
</Point>
</Placemark>
<Placemark>
<name>
            </name>
<styleUrl>#icon</styleUrl>
<Point>
<coordinates>
-67,-40.1
</coordinates>
</Point>
</Placemark>
<Placemark>
<name>
            </name>
<styleUrl>#icon</styleUrl>
<Point>
<coordinates>
-67,-40.6556
</coordinates>
</Point>
</Placemark>
<Placemark>
<name>
            </name>
<styleUrl>#icon</styleUrl>
<Point>
<coordinates>
-67,-41.2111
</coordinates>
</Point>
</Placemark>
<Placemark>
<name>
            </name>
<styleUrl>#icon</styleUrl>
<Point>
<coordinates>
-67,-41.7667
</coordinates>
</Point>
</Placemark>
<Placemark>
<name>
            </name>
<styleUrl>#icon</styleUrl>
<Point>
<coordinates>
-67,-42.3222
</coordinates>
</Point>
</Placemark>
<Placemark>
<name>
            </name>
<styleUrl>#icon</styleUrl>
<Point>
<coordinates>
-67,-42.8778
</coordinates>
</Point>
</Placemark>
<Placemark>
<name>
            </name>
<styleUrl>#icon</styleUrl>
<Point>
<coordinates>
-67,-43.4333
</coordinates>
</Point>
</Placemark>
<Placemark>
<name>
            </name>
<styleUrl>#icon</styleUrl>
<Point>
<coordinates>
-67,-43.9889
</coordinates>
</Point>
</Placemark>
<Placemark>
<name>
            </name>
<styleUrl>#icon</styleUrl>
<Point>
<coordinates>
-67,-44.5444
</coordinates>
</Point>
</Placemark>
<Placemark>
<name>
            </name>
<styleUrl>#icon</styleUrl>
<Point>
<coordinates>
-67,-45.1
</coordinates>
</Point>
</Placemark>
<Placemark>
<name>
            </name>
<styleUrl>#icon</styleUrl>
<Point>
<coordinates>
-67,-46.7667
</coordinates>
</Point>
</Placemark>
<Placemark>
<name>
            </name>
<styleUrl>#icon</styleUrl>
<Point>
<coordinates>
-67,-47.3222
</coordinates>
</Point>
</Placemark>
<Placemark>
<name>
            </name>
<styleUrl>#icon</styleUrl>
<Point>
<coordinates>
-67,-47.8778
</coordinates>
</Point>
</Placemark>
<Placemark>
<name>
            </name>
<styleUrl>#icon</styleUrl>
<Point>
<coordinates>
-67,-48.4333
</coordinates>
</Point>
</Placemark>
<Placemark>
<name>
            </name>
<styleUrl>#icon</styleUrl>
<Point>
<coordinates>
-67,-79.5444
</coordinates>
</Point>
</Placemark>
<Placemark>
<name>
            </name>
<styleUrl>#icon</styleUrl>
<Point>
<coordinates>
-66.1667,-18.4333
</coordinates>
</Point>
</Placemark>
<Placemark>
<name>
            </name>
<styleUrl>#icon</styleUrl>
<Point>
<coordinates>
-66.1667,-18.9889
</coordinates>
</Point>
</Placemark>
<Placemark>
<name>
            </name>
<styleUrl>#icon</styleUrl>
<Point>
<coordinates>
-66.1667,-19.5444
</coordinates>
</Point>
</Placemark>
<Placemark>
<name>
            </name>
<styleUrl>#icon</styleUrl>
<Point>
<coordinates>
-66.1667,-20.1
</coordinates>
</Point>
</Placemark>
<Placemark>
<name>
            </name>
<styleUrl>#icon</styleUrl>
<Point>
<coordinates>
-66.1667,-20.6556
</coordinates>
</Point>
</Placemark>
<Placemark>
<name>
            </name>
<styleUrl>#icon</styleUrl>
<Point>
<coordinates>
-66.1667,-21.2111
</coordinates>
</Point>
</Placemark>
<Placemark>
<name>
            </name>
<styleUrl>#icon</styleUrl>
<Point>
<coordinates>
-66.1667,-21.7667
</coordinates>
</Point>
</Placemark>
<Placemark>
<name>
            </name>
<styleUrl>#icon</styleUrl>
<Point>
<coordinates>
-66.1667,-22.3222
</coordinates>
</Point>
</Placemark>
<Placemark>
<name>
            </name>
<styleUrl>#icon</styleUrl>
<Point>
<coordinates>
-66.1667,-22.8778
</coordinates>
</Point>
</Placemark>
<Placemark>
<name>
            </name>
<styleUrl>#icon</styleUrl>
<Point>
<coordinates>
-66.1667,-23.4333
</coordinates>
</Point>
</Placemark>
<Placemark>
<name>
            </name>
<styleUrl>#icon</styleUrl>
<Point>
<coordinates>
-66.1667,-23.9889
</coordinates>
</Point>
</Placemark>
<Placemark>
<name>
            </name>
<styleUrl>#icon</styleUrl>
<Point>
<coordinates>
-66.1667,-24.5444
</coordinates>
</Point>
</Placemark>
<Placemark>
<name>
            </name>
<styleUrl>#icon</styleUrl>
<Point>
<coordinates>
-66.1667,-25.1
</coordinates>
</Point>
</Placemark>
<Placemark>
<name>
            </name>
<styleUrl>#icon</styleUrl>
<Point>
<coordinates>
-66.1667,-25.6556
</coordinates>
</Point>
</Placemark>
<Placemark>
<name>
            </name>
<styleUrl>#icon</styleUrl>
<Point>
<coordinates>
-66.1667,-26.2111
</coordinates>
</Point>
</Placemark>
<Placemark>
<name>
            </name>
<styleUrl>#icon</styleUrl>
<Point>
<coordinates>
-66.1667,-26.7667
</coordinates>
</Point>
</Placemark>
<Placemark>
<name>
            </name>
<styleUrl>#icon</styleUrl>
<Point>
<coordinates>
-66.1667,-27.3222
</coordinates>
</Point>
</Placemark>
<Placemark>
<name>
            </name>
<styleUrl>#icon</styleUrl>
<Point>
<coordinates>
-66.1667,-27.8778
</coordinates>
</Point>
</Placemark>
<Placemark>
<name>
            </name>
<styleUrl>#icon</styleUrl>
<Point>
<coordinates>
-66.1667,-28.4333
</coordinates>
</Point>
</Placemark>
<Placemark>
<name>
            </name>
<styleUrl>#icon</styleUrl>
<Point>
<coordinates>
-66.1667,-28.9889
</coordinates>
</Point>
</Placemark>
<Placemark>
<name>
            </name>
<styleUrl>#icon</styleUrl>
<Point>
<coordinates>
-66.1667,-29.5444
</coordinates>
</Point>
</Placemark>
<Placemark>
<name>
            </name>
<styleUrl>#icon</styleUrl>
<Point>
<coordinates>
-66.1667,-30.1
</coordinates>
</Point>
</Placemark>
<Placemark>
<name>
            </name>
<styleUrl>#icon</styleUrl>
<Point>
<coordinates>
-66.1667,-30.6556
</coordinates>
</Point>
</Placemark>
<Placemark>
<name>
            </name>
<styleUrl>#icon</styleUrl>
<Point>
<coordinates>
-66.1667,-31.2111
</coordinates>
</Point>
</Placemark>
<Placemark>
<name>
            </name>
<styleUrl>#icon</styleUrl>
<Point>
<coordinates>
-66.1667,-31.7667
</coordinates>
</Point>
</Placemark>
<Placemark>
<name>
            </name>
<styleUrl>#icon</styleUrl>
<Point>
<coordinates>
-66.1667,-32.3222
</coordinates>
</Point>
</Placemark>
<Placemark>
<name>
            </name>
<styleUrl>#icon</styleUrl>
<Point>
<coordinates>
-66.1667,-32.8778
</coordinates>
</Point>
</Placemark>
<Placemark>
<name>
            </name>
<styleUrl>#icon</styleUrl>
<Point>
<coordinates>
-66.1667,-33.4333
</coordinates>
</Point>
</Placemark>
<Placemark>
<name>
            </name>
<styleUrl>#icon</styleUrl>
<Point>
<coordinates>
-66.1667,-33.9889
</coordinates>
</Point>
</Placemark>
<Placemark>
<name>
            </name>
<styleUrl>#icon</styleUrl>
<Point>
<coordinates>
-66.1667,-34.5444
</coordinates>
</Point>
</Placemark>
<Placemark>
<name>
            </name>
<styleUrl>#icon</styleUrl>
<Point>
<coordinates>
-66.1667,-35.1
</coordinates>
</Point>
</Placemark>
<Placemark>
<name>
            </name>
<styleUrl>#icon</styleUrl>
<Point>
<coordinates>
-66.1667,-35.6556
</coordinates>
</Point>
</Placemark>
<Placemark>
<name>
            </name>
<styleUrl>#icon</styleUrl>
<Point>
<coordinates>
-66.1667,-36.2111
</coordinates>
</Point>
</Placemark>
<Placemark>
<name>
            </name>
<styleUrl>#icon</styleUrl>
<Point>
<coordinates>
-66.1667,-36.7667
</coordinates>
</Point>
</Placemark>
<Placemark>
<name>
            </name>
<styleUrl>#icon</styleUrl>
<Point>
<coordinates>
-66.1667,-37.3222
</coordinates>
</Point>
</Placemark>
<Placemark>
<name>
            </name>
<styleUrl>#icon</styleUrl>
<Point>
<coordinates>
-66.1667,-37.8778
</coordinates>
</Point>
</Placemark>
<Placemark>
<name>
            </name>
<styleUrl>#icon</styleUrl>
<Point>
<coordinates>
-66.1667,-38.4333
</coordinates>
</Point>
</Placemark>
<Placemark>
<name>
            </name>
<styleUrl>#icon</styleUrl>
<Point>
<coordinates>
-66.1667,-38.9889
</coordinates>
</Point>
</Placemark>
<Placemark>
<name>
            </name>
<styleUrl>#icon</styleUrl>
<Point>
<coordinates>
-66.1667,-39.5444
</coordinates>
</Point>
</Placemark>
<Placemark>
<name>
            </name>
<styleUrl>#icon</styleUrl>
<Point>
<coordinates>
-66.1667,-40.1
</coordinates>
</Point>
</Placemark>
<Placemark>
<name>
            </name>
<styleUrl>#icon</styleUrl>
<Point>
<coordinates>
-66.1667,-40.6556
</coordinates>
</Point>
</Placemark>
<Placemark>
<name>
            </name>
<styleUrl>#icon</styleUrl>
<Point>
<coordinates>
-66.1667,-41.2111
</coordinates>
</Point>
</Placemark>
<Placemark>
<name>
            </name>
<styleUrl>#icon</styleUrl>
<Point>
<coordinates>
-66.1667,-41.7667
</coordinates>
</Point>
</Placemark>
<Placemark>
<name>
            </name>
<styleUrl>#icon</styleUrl>
<Point>
<coordinates>
-66.1667,-42.3222
</coordinates>
</Point>
</Placemark>
<Placemark>
<name>
            </name>
<styleUrl>#icon</styleUrl>
<Point>
<coordinates>
-66.1667,-42.8778
</coordinates>
</Point>
</Placemark>
<Placemark>
<name>
            </name>
<styleUrl>#icon</styleUrl>
<Point>
<coordinates>
-66.1667,-43.4333
</coordinates>
</Point>
</Placemark>
<Placemark>
<name>
            </name>
<styleUrl>#icon</styleUrl>
<Point>
<coordinates>
-66.1667,-43.9889
</coordinates>
</Point>
</Placemark>
<Placemark>
<name>
            </name>
<styleUrl>#icon</styleUrl>
<Point>
<coordinates>
-66.1667,-44.5444
</coordinates>
</Point>
</Placemark>
<Placemark>
<name>
            </name>
<styleUrl>#icon</styleUrl>
<Point>
<coordinates>
-66.1667,-47.3222
</coordinates>
</Point>
</Placemark>
<Placemark>
<name>
            </name>
<styleUrl>#icon</styleUrl>
<Point>
<coordinates>
-66.1667,-47.8778
</coordinates>
</Point>
</Placemark>
<Placemark>
<name>
            </name>
<styleUrl>#icon</styleUrl>
<Point>
<coordinates>
-66.1667,-79.5444
</coordinates>
</Point>
</Placemark>
<Placemark>
<name>
            </name>
<styleUrl>#icon</styleUrl>
<Point>
<coordinates>
-65.3333,-17.8778
</coordinates>
</Point>
</Placemark>
<Placemark>
<name>
            </name>
<styleUrl>#icon</styleUrl>
<Point>
<coordinates>
-65.3333,-19.5444
</coordinates>
</Point>
</Placemark>
<Placemark>
<name>
            </name>
<styleUrl>#icon</styleUrl>
<Point>
<coordinates>
-65.3333,-20.1
</coordinates>
</Point>
</Placemark>
<Placemark>
<name>
            </name>
<styleUrl>#icon</styleUrl>
<Point>
<coordinates>
-65.3333,-20.6556
</coordinates>
</Point>
</Placemark>
<Placemark>
<name>
            </name>
<styleUrl>#icon</styleUrl>
<Point>
<coordinates>
-65.3333,-21.2111
</coordinates>
</Point>
</Placemark>
<Placemark>
<name>
            </name>
<styleUrl>#icon</styleUrl>
<Point>
<coordinates>
-65.3333,-21.7667
</coordinates>
</Point>
</Placemark>
<Placemark>
<name>
            </name>
<styleUrl>#icon</styleUrl>
<Point>
<coordinates>
-65.3333,-22.3222
</coordinates>
</Point>
</Placemark>
<Placemark>
<name>
            </name>
<styleUrl>#icon</styleUrl>
<Point>
<coordinates>
-65.3333,-22.8778
</coordinates>
</Point>
</Placemark>
<Placemark>
<name>
            </name>
<styleUrl>#icon</styleUrl>
<Point>
<coordinates>
-65.3333,-23.4333
</coordinates>
</Point>
</Placemark>
<Placemark>
<name>
            </name>
<styleUrl>#icon</styleUrl>
<Point>
<coordinates>
-65.3333,-25.1
</coordinates>
</Point>
</Placemark>
<Placemark>
<name>
            </name>
<styleUrl>#icon</styleUrl>
<Point>
<coordinates>
-65.3333,-25.6556
</coordinates>
</Point>
</Placemark>
<Placemark>
<name>
            </name>
<styleUrl>#icon</styleUrl>
<Point>
<coordinates>
-65.3333,-26.2111
</coordinates>
</Point>
</Placemark>
<Placemark>
<name>
            </name>
<styleUrl>#icon</styleUrl>
<Point>
<coordinates>
-65.3333,-27.8778
</coordinates>
</Point>
</Placemark>
<Placemark>
<name>
            </name>
<styleUrl>#icon</styleUrl>
<Point>
<coordinates>
-65.3333,-28.4333
</coordinates>
</Point>
</Placemark>
<Placemark>
<name>
            </name>
<styleUrl>#icon</styleUrl>
<Point>
<coordinates>
-65.3333,-28.9889
</coordinates>
</Point>
</Placemark>
<Placemark>
<name>
            </name>
<styleUrl>#icon</styleUrl>
<Point>
<coordinates>
-65.3333,-29.5444
</coordinates>
</Point>
</Placemark>
<Placemark>
<name>
            </name>
<styleUrl>#icon</styleUrl>
<Point>
<coordinates>
-65.3333,-30.1
</coordinates>
</Point>
</Placemark>
<Placemark>
<name>
            </name>
<styleUrl>#icon</styleUrl>
<Point>
<coordinates>
-65.3333,-30.6556
</coordinates>
</Point>
</Placemark>
<Placemark>
<name>
            </name>
<styleUrl>#icon</styleUrl>
<Point>
<coordinates>
-65.3333,-31.2111
</coordinates>
</Point>
</Placemark>
<Placemark>
<name>
            </name>
<styleUrl>#icon</styleUrl>
<Point>
<coordinates>
-65.3333,-31.7667
</coordinates>
</Point>
</Placemark>
<Placemark>
<name>
            </name>
<styleUrl>#icon</styleUrl>
<Point>
<coordinates>
-65.3333,-33.9889
</coordinates>
</Point>
</Placemark>
<Placemark>
<name>
            </name>
<styleUrl>#icon</styleUrl>
<Point>
<coordinates>
-65.3333,-34.5444
</coordinates>
</Point>
</Placemark>
<Placemark>
<name>
            </name>
<styleUrl>#icon</styleUrl>
<Point>
<coordinates>
-65.3333,-35.1
</coordinates>
</Point>
</Placemark>
<Placemark>
<name>
            </name>
<styleUrl>#icon</styleUrl>
<Point>
<coordinates>
-65.3333,-35.6556
</coordinates>
</Point>
</Placemark>
<Placemark>
<name>
            </name>
<styleUrl>#icon</styleUrl>
<Point>
<coordinates>
-65.3333,-36.2111
</coordinates>
</Point>
</Placemark>
<Placemark>
<name>
            </name>
<styleUrl>#icon</styleUrl>
<Point>
<coordinates>
-65.3333,-36.7667
</coordinates>
</Point>
</Placemark>
<Placemark>
<name>
            </name>
<styleUrl>#icon</styleUrl>
<Point>
<coordinates>
-65.3333,-37.3222
</coordinates>
</Point>
</Placemark>
<Placemark>
<name>
            </name>
<styleUrl>#icon</styleUrl>
<Point>
<coordinates>
-65.3333,-37.8778
</coordinates>
</Point>
</Placemark>
<Placemark>
<name>
            </name>
<styleUrl>#icon</styleUrl>
<Point>
<coordinates>
-65.3333,-38.4333
</coordinates>
</Point>
</Placemark>
<Placemark>
<name>
            </name>
<styleUrl>#icon</styleUrl>
<Point>
<coordinates>
-65.3333,-38.9889
</coordinates>
</Point>
</Placemark>
<Placemark>
<name>
            </name>
<styleUrl>#icon</styleUrl>
<Point>
<coordinates>
-65.3333,-39.5444
</coordinates>
</Point>
</Placemark>
<Placemark>
<name>
            </name>
<styleUrl>#icon</styleUrl>
<Point>
<coordinates>
-65.3333,-40.1
</coordinates>
</Point>
</Placemark>
<Placemark>
<name>
            </name>
<styleUrl>#icon</styleUrl>
<Point>
<coordinates>
-65.3333,-40.6556
</coordinates>
</Point>
</Placemark>
<Placemark>
<name>
            </name>
<styleUrl>#icon</styleUrl>
<Point>
<coordinates>
-65.3333,-41.2111
</coordinates>
</Point>
</Placemark>
<Placemark>
<name>
            </name>
<styleUrl>#icon</styleUrl>
<Point>
<coordinates>
-65.3333,-41.7667
</coordinates>
</Point>
</Placemark>
<Placemark>
<name>
            </name>
<styleUrl>#icon</styleUrl>
<Point>
<coordinates>
-65.3333,-42.3222
</coordinates>
</Point>
</Placemark>
<Placemark>
<name>
            </name>
<styleUrl>#icon</styleUrl>
<Point>
<coordinates>
-65.3333,-42.8778
</coordinates>
</Point>
</Placemark>
<Placemark>
<name>
            </name>
<styleUrl>#icon</styleUrl>
<Point>
<coordinates>
-65.3333,-43.4333
</coordinates>
</Point>
</Placemark>
<Placemark>
<name>
            </name>
<styleUrl>#icon</styleUrl>
<Point>
<coordinates>
-65.3333,-43.9889
</coordinates>
</Point>
</Placemark>
<Placemark>
<name>
            </name>
<styleUrl>#icon</styleUrl>
<Point>
<coordinates>
-64.5,-17.8778
</coordinates>
</Point>
</Placemark>
<Placemark>
<name>
            </name>
<styleUrl>#icon</styleUrl>
<Point>
<coordinates>
-64.5,-18.4333
</coordinates>
</Point>
</Placemark>
<Placemark>
<name>
            </name>
<styleUrl>#icon</styleUrl>
<Point>
<coordinates>
-64.5,-21.2111
</coordinates>
</Point>
</Placemark>
<Placemark>
<name>
            </name>
<styleUrl>#icon</styleUrl>
<Point>
<coordinates>
-64.5,-23.9889
</coordinates>
</Point>
</Placemark>
<Placemark>
<name>
            </name>
<styleUrl>#icon</styleUrl>
<Point>
<coordinates>
-64.5,-27.8778
</coordinates>
</Point>
</Placemark>
<Placemark>
<name>
            </name>
<styleUrl>#icon</styleUrl>
<Point>
<coordinates>
-64.5,-28.4333
</coordinates>
</Point>
</Placemark>
<Placemark>
<name>
            </name>
<styleUrl>#icon</styleUrl>
<Point>
<coordinates>
-64.5,-28.9889
</coordinates>
</Point>
</Placemark>
<Placemark>
<name>
            </name>
<styleUrl>#icon</styleUrl>
<Point>
<coordinates>
-64.5,-29.5444
</coordinates>
</Point>
</Placemark>
<Placemark>
<name>
            </name>
<styleUrl>#icon</styleUrl>
<Point>
<coordinates>
-64.5,-30.1
</coordinates>
</Point>
</Placemark>
<Placemark>
<name>
            </name>
<styleUrl>#icon</styleUrl>
<Point>
<coordinates>
-64.5,-30.6556
</coordinates>
</Point>
</Placemark>
<Placemark>
<name>
            </name>
<styleUrl>#icon</styleUrl>
<Point>
<coordinates>
-64.5,-34.5444
</coordinates>
</Point>
</Placemark>
<Placemark>
<name>
            </name>
<styleUrl>#icon</styleUrl>
<Point>
<coordinates>
-64.5,-36.7667
</coordinates>
</Point>
</Placemark>
<Placemark>
<name>
            </name>
<styleUrl>#icon</styleUrl>
<Point>
<coordinates>
-64.5,-37.3222
</coordinates>
</Point>
</Placemark>
<Placemark>
<name>
            </name>
<styleUrl>#icon</styleUrl>
<Point>
<coordinates>
-64.5,-37.8778
</coordinates>
</Point>
</Placemark>
<Placemark>
<name>
            </name>
<styleUrl>#icon</styleUrl>
<Point>
<coordinates>
-64.5,-38.4333
</coordinates>
</Point>
</Placemark>
<Placemark>
<name>
            </name>
<styleUrl>#icon</styleUrl>
<Point>
<coordinates>
-64.5,-38.9889
</coordinates>
</Point>
</Placemark>
<Placemark>
<name>
            </name>
<styleUrl>#icon</styleUrl>
<Point>
<coordinates>
-64.5,-39.5444
</coordinates>
</Point>
</Placemark>
<Placemark>
<name>
            </name>
<styleUrl>#icon</styleUrl>
<Point>
<coordinates>
-64.5,-40.1
</coordinates>
</Point>
</Placemark>
<Placemark>
<name>
            </name>
<styleUrl>#icon</styleUrl>
<Point>
<coordinates>
-64.5,-40.6556
</coordinates>
</Point>
</Placemark>
<Placemark>
<name>
            </name>
<styleUrl>#icon</styleUrl>
<Point>
<coordinates>
-64.5,-42.3222
</coordinates>
</Point>
</Placemark>
<Placemark>
<name>
            </name>
<styleUrl>#icon</styleUrl>
<Point>
<coordinates>
-64.5,-81.7667
</coordinates>
</Point>
</Placemark>
<Placemark>
<name>
            </name>
<styleUrl>#icon</styleUrl>
<Point>
<coordinates>
-63.6667,-17.8778
</coordinates>
</Point>
</Placemark>
<Placemark>
<name>
            </name>
<styleUrl>#icon</styleUrl>
<Point>
<coordinates>
-63.6667,-24.5444
</coordinates>
</Point>
</Placemark>
<Placemark>
<name>
            </name>
<styleUrl>#icon</styleUrl>
<Point>
<coordinates>
-63.6667,-25.1
</coordinates>
</Point>
</Placemark>
<Placemark>
<name>
            </name>
<styleUrl>#icon</styleUrl>
<Point>
<coordinates>
-63.6667,-25.6556
</coordinates>
</Point>
</Placemark>
<Placemark>
<name>
            </name>
<styleUrl>#icon</styleUrl>
<Point>
<coordinates>
-63.6667,-26.2111
</coordinates>
</Point>
</Placemark>
<Placemark>
<name>
            </name>
<styleUrl>#icon</styleUrl>
<Point>
<coordinates>
-63.6667,-26.7667
</coordinates>
</Point>
</Placemark>
<Placemark>
<name>
            </name>
<styleUrl>#icon</styleUrl>
<Point>
<coordinates>
-63.6667,-27.3222
</coordinates>
</Point>
</Placemark>
<Placemark>
<name>
            </name>
<styleUrl>#icon</styleUrl>
<Point>
<coordinates>
-63.6667,-27.8778
</coordinates>
</Point>
</Placemark>
<Placemark>
<name>
            </name>
<styleUrl>#icon</styleUrl>
<Point>
<coordinates>
-63.6667,-28.4333
</coordinates>
</Point>
</Placemark>
<Placemark>
<name>
            </name>
<styleUrl>#icon</styleUrl>
<Point>
<coordinates>
-63.6667,-37.3222
</coordinates>
</Point>
</Placemark>
<Placemark>
<name>
            </name>
<styleUrl>#icon</styleUrl>
<Point>
<coordinates>
-63.6667,-37.8778
</coordinates>
</Point>
</Placemark>
<Placemark>
<name>
            </name>
<styleUrl>#icon</styleUrl>
<Point>
<coordinates>
-63.6667,-38.4333
</coordinates>
</Point>
</Placemark>
<Placemark>
<name>
            </name>
<styleUrl>#icon</styleUrl>
<Point>
<coordinates>
-63.6667,-38.9889
</coordinates>
</Point>
</Placemark>
<Placemark>
<name>
            </name>
<styleUrl>#icon</styleUrl>
<Point>
<coordinates>
-63.6667,-39.5444
</coordinates>
</Point>
</Placemark>
<Placemark>
<name>
            </name>
<styleUrl>#icon</styleUrl>
<Point>
<coordinates>
-63.6667,-40.1
</coordinates>
</Point>
</Placemark>
<Placemark>
<name>
            </name>
<styleUrl>#icon</styleUrl>
<Point>
<coordinates>
-63.6667,-40.6556
</coordinates>
</Point>
</Placemark>
<Placemark>
<name>
            </name>
<styleUrl>#icon</styleUrl>
<Point>
<coordinates>
-63.6667,-42.3222
</coordinates>
</Point>
</Placemark>
<Placemark>
<name>
            </name>
<styleUrl>#icon</styleUrl>
<Point>
<coordinates>
-63.6667,-81.7667
</coordinates>
</Point>
</Placemark>
<Placemark>
<name>
            </name>
<styleUrl>#icon</styleUrl>
<Point>
<coordinates>
-62.8333,-18.4333
</coordinates>
</Point>
</Placemark>
<Placemark>
<name>
            </name>
<styleUrl>#icon</styleUrl>
<Point>
<coordinates>
-62.8333,-18.9889
</coordinates>
</Point>
</Placemark>
<Placemark>
<name>
            </name>
<styleUrl>#icon</styleUrl>
<Point>
<coordinates>
-62.8333,-19.5444
</coordinates>
</Point>
</Placemark>
<Placemark>
<name>
            </name>
<styleUrl>#icon</styleUrl>
<Point>
<coordinates>
-62.8333,-20.1
</coordinates>
</Point>
</Placemark>
<Placemark>
<name>
            </name>
<styleUrl>#icon</styleUrl>
<Point>
<coordinates>
-62.8333,-20.6556
</coordinates>
</Point>
</Placemark>
<Placemark>
<name>
            </name>
<styleUrl>#icon</styleUrl>
<Point>
<coordinates>
-62.8333,-21.2111
</coordinates>
</Point>
</Placemark>
<Placemark>
<name>
            </name>
<styleUrl>#icon</styleUrl>
<Point>
<coordinates>
-62.8333,-21.7667
</coordinates>
</Point>
</Placemark>
<Placemark>
<name>
            </name>
<styleUrl>#icon</styleUrl>
<Point>
<coordinates>
-62.8333,-22.3222
</coordinates>
</Point>
</Placemark>
<Placemark>
<name>
            </name>
<styleUrl>#icon</styleUrl>
<Point>
<coordinates>
-62.8333,-22.8778
</coordinates>
</Point>
</Placemark>
<Placemark>
<name>
            </name>
<styleUrl>#icon</styleUrl>
<Point>
<coordinates>
-62.8333,-23.4333
</coordinates>
</Point>
</Placemark>
<Placemark>
<name>
            </name>
<styleUrl>#icon</styleUrl>
<Point>
<coordinates>
-62.8333,-23.9889
</coordinates>
</Point>
</Placemark>
<Placemark>
<name>
            </name>
<styleUrl>#icon</styleUrl>
<Point>
<coordinates>
-62.8333,-24.5444
</coordinates>
</Point>
</Placemark>
<Placemark>
<name>
            </name>
<styleUrl>#icon</styleUrl>
<Point>
<coordinates>
-62.8333,-25.1
</coordinates>
</Point>
</Placemark>
<Placemark>
<name>
            </name>
<styleUrl>#icon</styleUrl>
<Point>
<coordinates>
-62.8333,-25.6556
</coordinates>
</Point>
</Placemark>
<Placemark>
<name>
            </name>
<styleUrl>#icon</styleUrl>
<Point>
<coordinates>
-62.8333,-26.2111
</coordinates>
</Point>
</Placemark>
<Placemark>
<name>
            </name>
<styleUrl>#icon</styleUrl>
<Point>
<coordinates>
-62.8333,-26.7667
</coordinates>
</Point>
</Placemark>
<Placemark>
<name>
            </name>
<styleUrl>#icon</styleUrl>
<Point>
<coordinates>
-62.8333,-27.3222
</coordinates>
</Point>
</Placemark>
<Placemark>
<name>
            </name>
<styleUrl>#icon</styleUrl>
<Point>
<coordinates>
-62.8333,-27.8778
</coordinates>
</Point>
</Placemark>
<Placemark>
<name>
            </name>
<styleUrl>#icon</styleUrl>
<Point>
<coordinates>
-62.8333,-38.4333
</coordinates>
</Point>
</Placemark>
<Placemark>
<name>
            </name>
<styleUrl>#icon</styleUrl>
<Point>
<coordinates>
-62.8333,-38.9889
</coordinates>
</Point>
</Placemark>
<Placemark>
<name>
            </name>
<styleUrl>#icon</styleUrl>
<Point>
<coordinates>
-62.8333,-39.5444
</coordinates>
</Point>
</Placemark>
<Placemark>
<name>
            </name>
<styleUrl>#icon</styleUrl>
<Point>
<coordinates>
-62.8333,-40.1
</coordinates>
</Point>
</Placemark>
<Placemark>
<name>
            </name>
<styleUrl>#icon</styleUrl>
<Point>
<coordinates>
-62.8333,-40.6556
</coordinates>
</Point>
</Placemark>
<Placemark>
<name>
            </name>
<styleUrl>#icon</styleUrl>
<Point>
<coordinates>
-62.8333,-81.7667
</coordinates>
</Point>
</Placemark>
<Placemark>
<name>
            </name>
<styleUrl>#icon</styleUrl>
<Point>
<coordinates>
-62,-18.4333
</coordinates>
</Point>
</Placemark>
<Placemark>
<name>
            </name>
<styleUrl>#icon</styleUrl>
<Point>
<coordinates>
-62,-18.9889
</coordinates>
</Point>
</Placemark>
<Placemark>
<name>
            </name>
<styleUrl>#icon</styleUrl>
<Point>
<coordinates>
-62,-19.5444
</coordinates>
</Point>
</Placemark>
<Placemark>
<name>
            </name>
<styleUrl>#icon</styleUrl>
<Point>
<coordinates>
-62,-20.1
</coordinates>
</Point>
</Placemark>
<Placemark>
<name>
            </name>
<styleUrl>#icon</styleUrl>
<Point>
<coordinates>
-62,-20.6556
</coordinates>
</Point>
</Placemark>
<Placemark>
<name>
            </name>
<styleUrl>#icon</styleUrl>
<Point>
<coordinates>
-62,-21.2111
</coordinates>
</Point>
</Placemark>
<Placemark>
<name>
            </name>
<styleUrl>#icon</styleUrl>
<Point>
<coordinates>
-62,-21.7667
</coordinates>
</Point>
</Placemark>
<Placemark>
<name>
            </name>
<styleUrl>#icon</styleUrl>
<Point>
<coordinates>
-62,-22.3222
</coordinates>
</Point>
</Placemark>
<Placemark>
<name>
            </name>
<styleUrl>#icon</styleUrl>
<Point>
<coordinates>
-62,-22.8778
</coordinates>
</Point>
</Placemark>
<Placemark>
<name>
            </name>
<styleUrl>#icon</styleUrl>
<Point>
<coordinates>
-62,-23.4333
</coordinates>
</Point>
</Placemark>
<Placemark>
<name>
            </name>
<styleUrl>#icon</styleUrl>
<Point>
<coordinates>
-62,-23.9889
</coordinates>
</Point>
</Placemark>
<Placemark>
<name>
            </name>
<styleUrl>#icon</styleUrl>
<Point>
<coordinates>
-62,-24.5444
</coordinates>
</Point>
</Placemark>
<Placemark>
<name>
            </name>
<styleUrl>#icon</styleUrl>
<Point>
<coordinates>
-62,-25.1
</coordinates>
</Point>
</Placemark>
<Placemark>
<name>
            </name>
<styleUrl>#icon</styleUrl>
<Point>
<coordinates>
-62,-25.6556
</coordinates>
</Point>
</Placemark>
<Placemark>
<name>
            </name>
<styleUrl>#icon</styleUrl>
<Point>
<coordinates>
-62,-26.2111
</coordinates>
</Point>
</Placemark>
<Placemark>
<name>
            </name>
<styleUrl>#icon</styleUrl>
<Point>
<coordinates>
-62,-26.7667
</coordinates>
</Point>
</Placemark>
<Placemark>
<name>
            </name>
<styleUrl>#icon</styleUrl>
<Point>
<coordinates>
-62,-81.7667
</coordinates>
</Point>
</Placemark>
<Placemark>
<name>
            </name>
<styleUrl>#icon</styleUrl>
<Point>
<coordinates>
-61.1667,-18.4333
</coordinates>
</Point>
</Placemark>
<Placemark>
<name>
            </name>
<styleUrl>#icon</styleUrl>
<Point>
<coordinates>
-61.1667,-18.9889
</coordinates>
</Point>
</Placemark>
<Placemark>
<name>
            </name>
<styleUrl>#icon</styleUrl>
<Point>
<coordinates>
-61.1667,-19.5444
</coordinates>
</Point>
</Placemark>
<Placemark>
<name>
            </name>
<styleUrl>#icon</styleUrl>
<Point>
<coordinates>
-61.1667,-20.1
</coordinates>
</Point>
</Placemark>
<Placemark>
<name>
            </name>
<styleUrl>#icon</styleUrl>
<Point>
<coordinates>
-61.1667,-20.6556
</coordinates>
</Point>
</Placemark>
<Placemark>
<name>
            </name>
<styleUrl>#icon</styleUrl>
<Point>
<coordinates>
-61.1667,-21.2111
</coordinates>
</Point>
</Placemark>
<Placemark>
<name>
            </name>
<styleUrl>#icon</styleUrl>
<Point>
<coordinates>
-61.1667,-21.7667
</coordinates>
</Point>
</Placemark>
<Placemark>
<name>
            </name>
<styleUrl>#icon</styleUrl>
<Point>
<coordinates>
-61.1667,-22.3222
</coordinates>
</Point>
</Placemark>
<Placemark>
<name>
            </name>
<styleUrl>#icon</styleUrl>
<Point>
<coordinates>
-61.1667,-22.8778
</coordinates>
</Point>
</Placemark>
<Placemark>
<name>
            </name>
<styleUrl>#icon</styleUrl>
<Point>
<coordinates>
-61.1667,-23.4333
</coordinates>
</Point>
</Placemark>
<Placemark>
<name>
            </name>
<styleUrl>#icon</styleUrl>
<Point>
<coordinates>
-61.1667,-23.9889
</coordinates>
</Point>
</Placemark>
<Placemark>
<name>
            </name>
<styleUrl>#icon</styleUrl>
<Point>
<coordinates>
-60.3333,-19.5444
</coordinates>
</Point>
</Placemark>
<Placemark>
<name>
            </name>
<styleUrl>#icon</styleUrl>
<Point>
<coordinates>
-60.3333,-20.1
</coordinates>
</Point>
</Placemark>
<Placemark>
<name>
            </name>
<styleUrl>#icon</styleUrl>
<Point>
<coordinates>
-60.3333,-20.6556
</coordinates>
</Point>
</Placemark>
<Placemark>
<name>
            </name>
<styleUrl>#icon</styleUrl>
<Point>
<coordinates>
-60.3333,-21.2111
</coordinates>
</Point>
</Placemark>
<Placemark>
<name>
            </name>
<styleUrl>#icon</styleUrl>
<Point>
<coordinates>
-60.3333,-21.7667
</coordinates>
</Point>
</Placemark>
<Placemark>
<name>
            </name>
<styleUrl>#icon</styleUrl>
<Point>
<coordinates>
-60.3333,-22.3222
</coordinates>
</Point>
</Placemark>
<Placemark>
<name>
            </name>
<styleUrl>#icon</styleUrl>
<Point>
<coordinates>
-60.3333,-22.8778
</coordinates>
</Point>
</Placemark>
<Placemark>
<name>
            </name>
<styleUrl>#icon</styleUrl>
<Point>
<coordinates>
-60.3333,-23.4333
</coordinates>
</Point>
</Placemark>
<Placemark>
<name>
            </name>
<styleUrl>#icon</styleUrl>
<Point>
<coordinates>
-59.5,-20.6556
</coordinates>
</Point>
</Placemark>
<Placemark>
<name>
            </name>
<styleUrl>#icon</styleUrl>
<Point>
<coordinates>
-59.5,-21.2111
</coordinates>
</Point>
</Placemark>
<Placemark>
<name>
            </name>
<styleUrl>#icon</styleUrl>
<Point>
<coordinates>
-59.5,-21.7667
</coordinates>
</Point>
</Placemark>
<Placemark>
<name>
            </name>
<styleUrl>#icon</styleUrl>
<Point>
<coordinates>
-59.5,-22.3222
</coordinates>
</Point>
</Placemark>
<Placemark>
<name>
            </name>
<styleUrl>#icon</styleUrl>
<Point>
<coordinates>
-59.5,-22.8778
</coordinates>
</Point>
</Placemark>
<Placemark>
<name>
            </name>
<styleUrl>#icon</styleUrl>
<Point>
<coordinates>
-59.5,-80.6556
</coordinates>
</Point>
</Placemark>
<Placemark>
<name>
            </name>
<styleUrl>#icon</styleUrl>
<Point>
<coordinates>
-42.8333,-7.8778
</coordinates>
</Point>
</Placemark>
<Placemark>
<name>
            </name>
<styleUrl>#icon</styleUrl>
<Point>
<coordinates>
-42.8333,-8.9889
</coordinates>
</Point>
</Placemark>
<Placemark>
<name>
            </name>
<styleUrl>#icon</styleUrl>
<Point>
<coordinates>
-42.8333,-9.5444
</coordinates>
</Point>
</Placemark>
<Placemark>
<name>
            </name>
<styleUrl>#icon</styleUrl>
<Point>
<coordinates>
-42.8333,-10.1
</coordinates>
</Point>
</Placemark>
<Placemark>
<name>
            </name>
<styleUrl>#icon</styleUrl>
<Point>
<coordinates>
-42.8333,-10.6556
</coordinates>
</Point>
</Placemark>
<Placemark>
<name>
            </name>
<styleUrl>#icon</styleUrl>
<Point>
<coordinates>
-42,-7.3222
</coordinates>
</Point>
</Placemark>
<Placemark>
<name>
            </name>
<styleUrl>#icon</styleUrl>
<Point>
<coordinates>
-42,-7.8778
</coordinates>
</Point>
</Placemark>
<Placemark>
<name>
            </name>
<styleUrl>#icon</styleUrl>
<Point>
<coordinates>
-42,-8.4333
</coordinates>
</Point>
</Placemark>
<Placemark>
<name>
            </name>
<styleUrl>#icon</styleUrl>
<Point>
<coordinates>
-42,-8.9889
</coordinates>
</Point>
</Placemark>
<Placemark>
<name>
            </name>
<styleUrl>#icon</styleUrl>
<Point>
<coordinates>
-42,-9.5444
</coordinates>
</Point>
</Placemark>
<Placemark>
<name>
            </name>
<styleUrl>#icon</styleUrl>
<Point>
<coordinates>
-42,-10.1
</coordinates>
</Point>
</Placemark>
<Placemark>
<name>
            </name>
<styleUrl>#icon</styleUrl>
<Point>
<coordinates>
-42,-10.6556
</coordinates>
</Point>
</Placemark>
<Placemark>
<name>
            </name>
<styleUrl>#icon</styleUrl>
<Point>
<coordinates>
-42,-11.2111
</coordinates>
</Point>
</Placemark>
<Placemark>
<name>
            </name>
<styleUrl>#icon</styleUrl>
<Point>
<coordinates>
-41.1667,-7.3222
</coordinates>
</Point>
</Placemark>
<Placemark>
<name>
            </name>
<styleUrl>#icon</styleUrl>
<Point>
<coordinates>
-41.1667,-7.8778
</coordinates>
</Point>
</Placemark>
<Placemark>
<name>
            </name>
<styleUrl>#icon</styleUrl>
<Point>
<coordinates>
-41.1667,-8.4333
</coordinates>
</Point>
</Placemark>
<Placemark>
<name>
            </name>
<styleUrl>#icon</styleUrl>
<Point>
<coordinates>
-41.1667,-8.9889
</coordinates>
</Point>
</Placemark>
<Placemark>
<name>
            </name>
<styleUrl>#icon</styleUrl>
<Point>
<coordinates>
-41.1667,-9.5444
</coordinates>
</Point>
</Placemark>
<Placemark>
<name>
            </name>
<styleUrl>#icon</styleUrl>
<Point>
<coordinates>
-41.1667,-10.1
</coordinates>
</Point>
</Placemark>
<Placemark>
<name>
            </name>
<styleUrl>#icon</styleUrl>
<Point>
<coordinates>
-41.1667,-10.6556
</coordinates>
</Point>
</Placemark>
<Placemark>
<name>
            </name>
<styleUrl>#icon</styleUrl>
<Point>
<coordinates>
-41.1667,-11.2111
</coordinates>
</Point>
</Placemark>
<Placemark>
<name>
            </name>
<styleUrl>#icon</styleUrl>
<Point>
<coordinates>
-41.1667,-13.9889
</coordinates>
</Point>
</Placemark>
<Placemark>
<name>
            </name>
<styleUrl>#icon</styleUrl>
<Point>
<coordinates>
-41.1667,-14.5444
</coordinates>
</Point>
</Placemark>
<Placemark>
<name>
            </name>
<styleUrl>#icon</styleUrl>
<Point>
<coordinates>
-40.3333,-4.5444
</coordinates>
</Point>
</Placemark>
<Placemark>
<name>
            </name>
<styleUrl>#icon</styleUrl>
<Point>
<coordinates>
-40.3333,-5.1
</coordinates>
</Point>
</Placemark>
<Placemark>
<name>
            </name>
<styleUrl>#icon</styleUrl>
<Point>
<coordinates>
-40.3333,-5.6556
</coordinates>
</Point>
</Placemark>
<Placemark>
<name>
            </name>
<styleUrl>#icon</styleUrl>
<Point>
<coordinates>
-40.3333,-6.2111
</coordinates>
</Point>
</Placemark>
<Placemark>
<name>
            </name>
<styleUrl>#icon</styleUrl>
<Point>
<coordinates>
-40.3333,-6.7667
</coordinates>
</Point>
</Placemark>
<Placemark>
<name>
            </name>
<styleUrl>#icon</styleUrl>
<Point>
<coordinates>
-40.3333,-7.3222
</coordinates>
</Point>
</Placemark>
<Placemark>
<name>
            </name>
<styleUrl>#icon</styleUrl>
<Point>
<coordinates>
-40.3333,-7.8778
</coordinates>
</Point>
</Placemark>
<Placemark>
<name>
            </name>
<styleUrl>#icon</styleUrl>
<Point>
<coordinates>
-40.3333,-8.4333
</coordinates>
</Point>
</Placemark>
<Placemark>
<name>
            </name>
<styleUrl>#icon</styleUrl>
<Point>
<coordinates>
-40.3333,-8.9889
</coordinates>
</Point>
</Placemark>
<Placemark>
<name>
            </name>
<styleUrl>#icon</styleUrl>
<Point>
<coordinates>
-40.3333,-9.5444
</coordinates>
</Point>
</Placemark>
<Placemark>
<name>
            </name>
<styleUrl>#icon</styleUrl>
<Point>
<coordinates>
-40.3333,-10.1
</coordinates>
</Point>
</Placemark>
<Placemark>
<name>
            </name>
<styleUrl>#icon</styleUrl>
<Point>
<coordinates>
-40.3333,-12.3222
</coordinates>
</Point>
</Placemark>
<Placemark>
<name>
            </name>
<styleUrl>#icon</styleUrl>
<Point>
<coordinates>
-40.3333,-13.9889
</coordinates>
</Point>
</Placemark>
<Placemark>
<name>
            </name>
<styleUrl>#icon</styleUrl>
<Point>
<coordinates>
-39.5,-3.9889
</coordinates>
</Point>
</Placemark>
<Placemark>
<name>
            </name>
<styleUrl>#icon</styleUrl>
<Point>
<coordinates>
-39.5,-4.5444
</coordinates>
</Point>
</Placemark>
<Placemark>
<name>
            </name>
<styleUrl>#icon</styleUrl>
<Point>
<coordinates>
-39.5,-5.1
</coordinates>
</Point>
</Placemark>
<Placemark>
<name>
            </name>
<styleUrl>#icon</styleUrl>
<Point>
<coordinates>
-39.5,-5.6556
</coordinates>
</Point>
</Placemark>
<Placemark>
<name>
            </name>
<styleUrl>#icon</styleUrl>
<Point>
<coordinates>
-39.5,-6.2111
</coordinates>
</Point>
</Placemark>
<Placemark>
<name>
            </name>
<styleUrl>#icon</styleUrl>
<Point>
<coordinates>
-39.5,-6.7667
</coordinates>
</Point>
</Placemark>
<Placemark>
<name>
            </name>
<styleUrl>#icon</styleUrl>
<Point>
<coordinates>
-39.5,-7.3222
</coordinates>
</Point>
</Placemark>
<Placemark>
<name>
            </name>
<styleUrl>#icon</styleUrl>
<Point>
<coordinates>
-39.5,-7.8778
</coordinates>
</Point>
</Placemark>
<Placemark>
<name>
            </name>
<styleUrl>#icon</styleUrl>
<Point>
<coordinates>
-39.5,-8.4333
</coordinates>
</Point>
</Placemark>
<Placemark>
<name>
            </name>
<styleUrl>#icon</styleUrl>
<Point>
<coordinates>
-39.5,-8.9889
</coordinates>
</Point>
</Placemark>
<Placemark>
<name>
            </name>
<styleUrl>#icon</styleUrl>
<Point>
<coordinates>
-39.5,-9.5444
</coordinates>
</Point>
</Placemark>
<Placemark>
<name>
            </name>
<styleUrl>#icon</styleUrl>
<Point>
<coordinates>
-39.5,-10.1
</coordinates>
</Point>
</Placemark>
<Placemark>
<name>
            </name>
<styleUrl>#icon</styleUrl>
<Point>
<coordinates>
-39.5,-10.6556
</coordinates>
</Point>
</Placemark>
<Placemark>
<name>
            </name>
<styleUrl>#icon</styleUrl>
<Point>
<coordinates>
-39.5,-11.2111
</coordinates>
</Point>
</Placemark>
<Placemark>
<name>
            </name>
<styleUrl>#icon</styleUrl>
<Point>
<coordinates>
-39.5,-11.7667
</coordinates>
</Point>
</Placemark>
<Placemark>
<name>
            </name>
<styleUrl>#icon</styleUrl>
<Point>
<coordinates>
-39.5,-12.3222
</coordinates>
</Point>
</Placemark>
<Placemark>
<name>
            </name>
<styleUrl>#icon</styleUrl>
<Point>
<coordinates>
-38.6667,-5.1
</coordinates>
</Point>
</Placemark>
<Placemark>
<name>
            </name>
<styleUrl>#icon</styleUrl>
<Point>
<coordinates>
-38.6667,-5.6556
</coordinates>
</Point>
</Placemark>
<Placemark>
<name>
            </name>
<styleUrl>#icon</styleUrl>
<Point>
<coordinates>
-38.6667,-7.8778
</coordinates>
</Point>
</Placemark>
<Placemark>
<name>
    T (local)        </name>
<styleUrl>#icon</styleUrl>
<Point>
<coordinates>
-38.6667,-8.4333
</coordinates>
</Point>
</Placemark>
<Placemark>
<name>
            </name>
<styleUrl>#icon</styleUrl>
<Point>
<coordinates>
-38.6667,-8.9889
</coordinates>
</Point>
</Placemark>
<Placemark>
<name>
            </name>
<styleUrl>#icon</styleUrl>
<Point>
<coordinates>
-38.6667,-9.5444
</coordinates>
</Point>
</Placemark>
<Placemark>
<name>
            </name>
<styleUrl>#icon</styleUrl>
<Point>
<coordinates>
-37.8333,-5.6556
</coordinates>
</Point>
</Placemark>
<Placemark>
<name>
            </name>
<styleUrl>#icon</styleUrl>
<Point>
<coordinates>
-37.8333,-7.3222
</coordinates>
</Point>
</Placemark>
<Placemark>
<name>
            </name>
<styleUrl>#icon</styleUrl>
<Point>
<coordinates>
-37.8333,-7.8778
</coordinates>
</Point>
</Placemark>
<Placemark>
<name>
            </name>
<styleUrl>#icon</styleUrl>
<Point>
<coordinates>
-37.8333,-8.4333
</coordinates>
</Point>
</Placemark>
<Placemark>
<name>
            </name>
<styleUrl>#icon</styleUrl>
<Point>
<coordinates>
-37.8333,-8.9889
</coordinates>
</Point>
</Placemark>
<Placemark>
<name>
            </name>
<styleUrl>#icon</styleUrl>
<Point>
<coordinates>
-37.8333,-9.5444
</coordinates>
</Point>
</Placemark>
<Placemark>
<name>
            </name>
<styleUrl>#icon</styleUrl>
<Point>
<coordinates>
-37.8333,-10.1
</coordinates>
</Point>
</Placemark>
<Placemark>
<name>
    T (local)        </name>
<styleUrl>#icon</styleUrl>
<Point>
<coordinates>
-37,-5.1
</coordinates>
</Point>
</Placemark>
<Placemark>
<name>
            </name>
<styleUrl>#icon</styleUrl>
<Point>
<coordinates>
-37,-5.6556
</coordinates>
</Point>
</Placemark>
<Placemark>
<name>
            </name>
<styleUrl>#icon</styleUrl>
<Point>
<coordinates>
-37,-6.2111
</coordinates>
</Point>
</Placemark>
<Placemark>
<name>
            </name>
<styleUrl>#icon</styleUrl>
<Point>
<coordinates>
-37,-6.7667
</coordinates>
</Point>
</Placemark>
<Placemark>
<name>
            </name>
<styleUrl>#icon</styleUrl>
<Point>
<coordinates>
-37,-7.3222
</coordinates>
</Point>
</Placemark>
<Placemark>
<name>
            </name>
<styleUrl>#icon</styleUrl>
<Point>
<coordinates>
-37,-7.8778
</coordinates>
</Point>
</Placemark>
<Placemark>
<name>
            </name>
<styleUrl>#icon</styleUrl>
<Point>
<coordinates>
-37,-8.4333
</coordinates>
</Point>
</Placemark>
<Placemark>
<name>
            </name>
<styleUrl>#icon</styleUrl>
<Point>
<coordinates>
-37,-8.9889
</coordinates>
</Point>
</Placemark>
<Placemark>
<name>
            </name>
<styleUrl>#icon</styleUrl>
<Point>
<coordinates>
-37,-9.5444
</coordinates>
</Point>
</Placemark>
<Placemark>
<name>
B (local)    T (local)        </name>
<styleUrl>#icon</styleUrl>
<Point>
<coordinates>
-36.1667,-5.1
</coordinates>
</Point>
</Placemark>
<Placemark>
<name>
            </name>
<styleUrl>#icon</styleUrl>
<Point>
<coordinates>
-36.1667,-5.6556
</coordinates>
</Point>
</Placemark>
<Placemark>
<name>
            </name>
<styleUrl>#icon</styleUrl>
<Point>
<coordinates>
-36.1667,-6.2111
</coordinates>
</Point>
</Placemark>
<Placemark>
<name>
            </name>
<styleUrl>#icon</styleUrl>
<Point>
<coordinates>
-36.1667,-6.7667
</coordinates>
</Point>
</Placemark>
<Placemark>
<name>
            </name>
<styleUrl>#icon</styleUrl>
<Point>
<coordinates>
-36.1667,-7.3222
</coordinates>
</Point>
</Placemark>
<Placemark>
<name>
            </name>
<styleUrl>#icon</styleUrl>
<Point>
<coordinates>
-36.1667,-7.8778
</coordinates>
</Point>
</Placemark>
<Placemark>
<name>
            </name>
<styleUrl>#icon</styleUrl>
<Point>
<coordinates>
-36.1667,-78.9889
</coordinates>
</Point>
</Placemark>
<Placemark>
<name>
            </name>
<styleUrl>#icon</styleUrl>
<Point>
<coordinates>
-32,82.1222
</coordinates>
</Point>
</Placemark>
<Placemark>
<name>
            </name>
<styleUrl>#icon</styleUrl>
<Point>
<coordinates>
-31.1667,-79.5444
</coordinates>
</Point>
</Placemark>
<Placemark>
<name>
            </name>
<styleUrl>#icon</styleUrl>
<Point>
<coordinates>
-30.3333,-79.5444
</coordinates>
</Point>
</Placemark>
<Placemark>
<name>
B (full)            </name>
<styleUrl>#icon</styleUrl>
<Point>
<coordinates>
-17,21.5667
</coordinates>
</Point>
</Placemark>
<Placemark>
<name>
            </name>
<styleUrl>#icon</styleUrl>
<Point>
<coordinates>
-17,14.9
</coordinates>
</Point>
</Placemark>
<Placemark>
<name>
B (local)        L (local)    </name>
<styleUrl>#icon</styleUrl>
<Point>
<coordinates>
-16.1667,22.6778
</coordinates>
</Point>
</Placemark>
<Placemark>
<name>
B (sparse)            </name>
<styleUrl>#icon</styleUrl>
<Point>
<coordinates>
-16.1667,22.1222
</coordinates>
</Point>
</Placemark>
<Placemark>
<name>
B (partial)            </name>
<styleUrl>#icon</styleUrl>
<Point>
<coordinates>
-16.1667,21.5667
</coordinates>
</Point>
</Placemark>
<Placemark>
<name>
B (sparse)        L (sparse)    </name>
<styleUrl>#icon</styleUrl>
<Point>
<coordinates>
-16.1667,21.0111
</coordinates>
</Point>
</Placemark>
<Placemark>
<name>
B (sparse)    T (partial)    L (sparse)    </name>
<styleUrl>#icon</styleUrl>
<Point>
<coordinates>
-16.1667,19.9
</coordinates>
</Point>
</Placemark>
<Placemark>
<name>
B (sparse)    T (sparse)    L (partial)    </name>
<styleUrl>#icon</styleUrl>
<Point>
<coordinates>
-16.1667,19.3444
</coordinates>
</Point>
</Placemark>
<Placemark>
<name>
    T (local)        </name>
<styleUrl>#icon</styleUrl>
<Point>
<coordinates>
-16.1667,17.1222
</coordinates>
</Point>
</Placemark>
<Placemark>
<name>
    T (local)        </name>
<styleUrl>#icon</styleUrl>
<Point>
<coordinates>
-16.1667,16.5667
</coordinates>
</Point>
</Placemark>
<Placemark>
<name>
            </name>
<styleUrl>#icon</styleUrl>
<Point>
<coordinates>
-16.1667,16.0111
</coordinates>
</Point>
</Placemark>
<Placemark>
<name>
            </name>
<styleUrl>#icon</styleUrl>
<Point>
<coordinates>
-16.1667,15.4556
</coordinates>
</Point>
</Placemark>
<Placemark>
<name>
            </name>
<styleUrl>#icon</styleUrl>
<Point>
<coordinates>
-16.1667,14.9
</coordinates>
</Point>
</Placemark>
<Placemark>
<name>
            </name>
<styleUrl>#icon</styleUrl>
<Point>
<coordinates>
-16.1667,14.3444
</coordinates>
</Point>
</Placemark>
<Placemark>
<name>
            </name>
<styleUrl>#icon</styleUrl>
<Point>
<coordinates>
-16.1667,13.7889
</coordinates>
</Point>
</Placemark>
<Placemark>
<name>
B (local)        L (local)    </name>
<styleUrl>#icon</styleUrl>
<Point>
<coordinates>
-15.3333,24.3444
</coordinates>
</Point>
</Placemark>
<Placemark>
<name>
B (local)        L (local)    </name>
<styleUrl>#icon</styleUrl>
<Point>
<coordinates>
-15.3333,23.7889
</coordinates>
</Point>
</Placemark>
<Placemark>
<name>
B (local)        L (local)    </name>
<styleUrl>#icon</styleUrl>
<Point>
<coordinates>
-15.3333,23.2333
</coordinates>
</Point>
</Placemark>
<Placemark>
<name>
B (sparse)        L (sparse)    </name>
<styleUrl>#icon</styleUrl>
<Point>
<coordinates>
-15.3333,22.6778
</coordinates>
</Point>
</Placemark>
<Placemark>
<name>
B (sparse)        L (sparse)    </name>
<styleUrl>#icon</styleUrl>
<Point>
<coordinates>
-15.3333,22.1222
</coordinates>
</Point>
</Placemark>
<Placemark>
<name>
B (sparse)            </name>
<styleUrl>#icon</styleUrl>
<Point>
<coordinates>
-15.3333,21.5667
</coordinates>
</Point>
</Placemark>
<Placemark>
<name>
B (sparse)        L (local)    </name>
<styleUrl>#icon</styleUrl>
<Point>
<coordinates>
-15.3333,21.0111
</coordinates>
</Point>
</Placemark>
<Placemark>
<name>
B (sparse)    T (sparse)    L (sparse)    </name>
<styleUrl>#icon</styleUrl>
<Point>
<coordinates>
-15.3333,20.4556
</coordinates>
</Point>
</Placemark>
<Placemark>
<name>
B (partial)    T (partial)    L (sparse)    </name>
<styleUrl>#icon</styleUrl>
<Point>
<coordinates>
-15.3333,19.9
</coordinates>
</Point>
</Placemark>
<Placemark>
<name>
B (sparse)    T (sparse)    L (sparse)    </name>
<styleUrl>#icon</styleUrl>
<Point>
<coordinates>
-15.3333,19.3444
</coordinates>
</Point>
</Placemark>
<Placemark>
<name>
B (partial)    T (partial)        </name>
<styleUrl>#icon</styleUrl>
<Point>
<coordinates>
-15.3333,18.7889
</coordinates>
</Point>
</Placemark>
<Placemark>
<name>
    T (full)        </name>
<styleUrl>#icon</styleUrl>
<Point>
<coordinates>
-15.3333,18.2333
</coordinates>
</Point>
</Placemark>
<Placemark>
<name>
    T (sparse)        </name>
<styleUrl>#icon</styleUrl>
<Point>
<coordinates>
-15.3333,17.6778
</coordinates>
</Point>
</Placemark>
<Placemark>
<name>
            </name>
<styleUrl>#icon</styleUrl>
<Point>
<coordinates>
-15.3333,17.1222
</coordinates>
</Point>
</Placemark>
<Placemark>
<name>
            </name>
<styleUrl>#icon</styleUrl>
<Point>
<coordinates>
-15.3333,16.5667
</coordinates>
</Point>
</Placemark>
<Placemark>
<name>
            </name>
<styleUrl>#icon</styleUrl>
<Point>
<coordinates>
-15.3333,16.0111
</coordinates>
</Point>
</Placemark>
<Placemark>
<name>
            </name>
<styleUrl>#icon</styleUrl>
<Point>
<coordinates>
-15.3333,15.4556
</coordinates>
</Point>
</Placemark>
<Placemark>
<name>
            </name>
<styleUrl>#icon</styleUrl>
<Point>
<coordinates>
-15.3333,14.9
</coordinates>
</Point>
</Placemark>
<Placemark>
<name>
            </name>
<styleUrl>#icon</styleUrl>
<Point>
<coordinates>
-15.3333,14.3444
</coordinates>
</Point>
</Placemark>
<Placemark>
<name>
            </name>
<styleUrl>#icon</styleUrl>
<Point>
<coordinates>
-15.3333,13.7889
</coordinates>
</Point>
</Placemark>
<Placemark>
<name>
            </name>
<styleUrl>#icon</styleUrl>
<Point>
<coordinates>
-14.5,25.4556
</coordinates>
</Point>
</Placemark>
<Placemark>
<name>
B (local)            </name>
<styleUrl>#icon</styleUrl>
<Point>
<coordinates>
-14.5,24.9
</coordinates>
</Point>
</Placemark>
<Placemark>
<name>
B (sparse)        L (local)    </name>
<styleUrl>#icon</styleUrl>
<Point>
<coordinates>
-14.5,24.3444
</coordinates>
</Point>
</Placemark>
<Placemark>
<name>
            </name>
<styleUrl>#icon</styleUrl>
<Point>
<coordinates>
-14.5,23.7889
</coordinates>
</Point>
</Placemark>
<Placemark>
<name>
            </name>
<styleUrl>#icon</styleUrl>
<Point>
<coordinates>
-14.5,23.2333
</coordinates>
</Point>
</Placemark>
<Placemark>
<name>
            </name>
<styleUrl>#icon</styleUrl>
<Point>
<coordinates>
-14.5,22.6778
</coordinates>
</Point>
</Placemark>
<Placemark>
<name>
B (local)        L (local)    </name>
<styleUrl>#icon</styleUrl>
<Point>
<coordinates>
-14.5,22.1222
</coordinates>
</Point>
</Placemark>
<Placemark>
<name>
B (sparse)        L (local)    </name>
<styleUrl>#icon</styleUrl>
<Point>
<coordinates>
-14.5,21.5667
</coordinates>
</Point>
</Placemark>
<Placemark>
<name>
B (sparse)    T (sparse)    L (local)    </name>
<styleUrl>#icon</styleUrl>
<Point>
<coordinates>
-14.5,21.0111
</coordinates>
</Point>
</Placemark>
<Placemark>
<name>
B (partial)    T (partial)    L (sparse)    </name>
<styleUrl>#icon</styleUrl>
<Point>
<coordinates>
-14.5,20.4556
</coordinates>
</Point>
</Placemark>
<Placemark>
<name>
B (sparse)    T (sparse)    L (sparse)    </name>
<styleUrl>#icon</styleUrl>
<Point>
<coordinates>
-14.5,19.9
</coordinates>
</Point>
</Placemark>
<Placemark>
<name>
B (sparse)    T (sparse)    L (local)    </name>
<styleUrl>#icon</styleUrl>
<Point>
<coordinates>
-14.5,19.3444
</coordinates>
</Point>
</Placemark>
<Placemark>
<name>
B (partial)    T (partial)    L (sparse)    </name>
<styleUrl>#icon</styleUrl>
<Point>
<coordinates>
-14.5,18.7889
</coordinates>
</Point>
</Placemark>
<Placemark>
<name>
    T (full)    L (full)    </name>
<styleUrl>#icon</styleUrl>
<Point>
<coordinates>
-14.5,18.2333
</coordinates>
</Point>
</Placemark>
<Placemark>
<name>
    T (full)    L (full)    </name>
<styleUrl>#icon</styleUrl>
<Point>
<coordinates>
-14.5,17.6778
</coordinates>
</Point>
</Placemark>
<Placemark>
<name>
    T (sparse)    L (sparse)    </name>
<styleUrl>#icon</styleUrl>
<Point>
<coordinates>
-14.5,17.1222
</coordinates>
</Point>
</Placemark>
<Placemark>
<name>
            </name>
<styleUrl>#icon</styleUrl>
<Point>
<coordinates>
-14.5,16.5667
</coordinates>
</Point>
</Placemark>
<Placemark>
<name>
            </name>
<styleUrl>#icon</styleUrl>
<Point>
<coordinates>
-14.5,16.0111
</coordinates>
</Point>
</Placemark>
<Placemark>
<name>
            </name>
<styleUrl>#icon</styleUrl>
<Point>
<coordinates>
-14.5,15.4556
</coordinates>
</Point>
</Placemark>
<Placemark>
<name>
            </name>
<styleUrl>#icon</styleUrl>
<Point>
<coordinates>
-14.5,14.9
</coordinates>
</Point>
</Placemark>
<Placemark>
<name>
            </name>
<styleUrl>#icon</styleUrl>
<Point>
<coordinates>
-14.5,14.3444
</coordinates>
</Point>
</Placemark>
<Placemark>
<name>
            </name>
<styleUrl>#icon</styleUrl>
<Point>
<coordinates>
-14.5,13.7889
</coordinates>
</Point>
</Placemark>
<Placemark>
<name>
B (sparse)            </name>
<styleUrl>#icon</styleUrl>
<Point>
<coordinates>
-13.6667,26.5667
</coordinates>
</Point>
</Placemark>
<Placemark>
<name>
B (sparse)    T (sparse)        </name>
<styleUrl>#icon</styleUrl>
<Point>
<coordinates>
-13.6667,26.0111
</coordinates>
</Point>
</Placemark>
<Placemark>
<name>
B (local)    T (local)        </name>
<styleUrl>#icon</styleUrl>
<Point>
<coordinates>
-13.6667,25.4556
</coordinates>
</Point>
</Placemark>
<Placemark>
<name>
            </name>
<styleUrl>#icon</styleUrl>
<Point>
<coordinates>
-13.6667,24.9
</coordinates>
</Point>
</Placemark>
<Placemark>
<name>
            </name>
<styleUrl>#icon</styleUrl>
<Point>
<coordinates>
-13.6667,24.3444
</coordinates>
</Point>
</Placemark>
<Placemark>
<name>
            </name>
<styleUrl>#icon</styleUrl>
<Point>
<coordinates>
-13.6667,23.7889
</coordinates>
</Point>
</Placemark>
<Placemark>
<name>
            </name>
<styleUrl>#icon</styleUrl>
<Point>
<coordinates>
-13.6667,23.2333
</coordinates>
</Point>
</Placemark>
<Placemark>
<name>
        L (local)    </name>
<styleUrl>#icon</styleUrl>
<Point>
<coordinates>
-13.6667,22.6778
</coordinates>
</Point>
</Placemark>
<Placemark>
<name>
        L (sparse)    </name>
<styleUrl>#icon</styleUrl>
<Point>
<coordinates>
-13.6667,22.1222
</coordinates>
</Point>
</Placemark>
<Placemark>
<name>
B (partial)    T (partial)    L (partial)    </name>
<styleUrl>#icon</styleUrl>
<Point>
<coordinates>
-13.6667,21.5667
</coordinates>
</Point>
</Placemark>
<Placemark>
<name>
B (partial)    T (partial)    L (partial)    </name>
<styleUrl>#icon</styleUrl>
<Point>
<coordinates>
-13.6667,21.0111
</coordinates>
</Point>
</Placemark>
<Placemark>
<name>
B (sparse)    T (sparse)    L (sparse)    </name>
<styleUrl>#icon</styleUrl>
<Point>
<coordinates>
-13.6667,20.4556
</coordinates>
</Point>
</Placemark>
<Placemark>
<name>
B (partial)    T (partial)    L (partial)    </name>
<styleUrl>#icon</styleUrl>
<Point>
<coordinates>
-13.6667,19.9
</coordinates>
</Point>
</Placemark>
<Placemark>
<name>
B (full)    T (partial)    L (partial)    </name>
<styleUrl>#icon</styleUrl>
<Point>
<coordinates>
-13.6667,19.3444
</coordinates>
</Point>
</Placemark>
<Placemark>
<name>
B (partial)    T (full)    L (sparse)    </name>
<styleUrl>#icon</styleUrl>
<Point>
<coordinates>
-13.6667,18.7889
</coordinates>
</Point>
</Placemark>
<Placemark>
<name>
B (partial)    T (full)    L (sparse)    </name>
<styleUrl>#icon</styleUrl>
<Point>
<coordinates>
-13.6667,18.2333
</coordinates>
</Point>
</Placemark>
<Placemark>
<name>
B (partial)    T (partial)    L (sparse)    </name>
<styleUrl>#icon</styleUrl>
<Point>
<coordinates>
-13.6667,17.6778
</coordinates>
</Point>
</Placemark>
<Placemark>
<name>
    T (sparse)        </name>
<styleUrl>#icon</styleUrl>
<Point>
<coordinates>
-13.6667,17.1222
</coordinates>
</Point>
</Placemark>
<Placemark>
<name>
            </name>
<styleUrl>#icon</styleUrl>
<Point>
<coordinates>
-13.6667,16.5667
</coordinates>
</Point>
</Placemark>
<Placemark>
<name>
            </name>
<styleUrl>#icon</styleUrl>
<Point>
<coordinates>
-13.6667,16.0111
</coordinates>
</Point>
</Placemark>
<Placemark>
<name>
            </name>
<styleUrl>#icon</styleUrl>
<Point>
<coordinates>
-13.6667,15.4556
</coordinates>
</Point>
</Placemark>
<Placemark>
<name>
            </name>
<styleUrl>#icon</styleUrl>
<Point>
<coordinates>
-13.6667,14.9
</coordinates>
</Point>
</Placemark>
<Placemark>
<name>
            </name>
<styleUrl>#icon</styleUrl>
<Point>
<coordinates>
-13.6667,14.3444
</coordinates>
</Point>
</Placemark>
<Placemark>
<name>
            </name>
<styleUrl>#icon</styleUrl>
<Point>
<coordinates>
-13.6667,13.7889
</coordinates>
</Point>
</Placemark>
<Placemark>
<name>
B (partial)    T (sparse)        </name>
<styleUrl>#icon</styleUrl>
<Point>
<coordinates>
-12.8333,27.6778
</coordinates>
</Point>
</Placemark>
<Placemark>
<name>
B (sparse)    T (sparse)        </name>
<styleUrl>#icon</styleUrl>
<Point>
<coordinates>
-12.8333,27.1222
</coordinates>
</Point>
</Placemark>
<Placemark>
<name>
            </name>
<styleUrl>#icon</styleUrl>
<Point>
<coordinates>
-12.8333,26.5667
</coordinates>
</Point>
</Placemark>
<Placemark>
<name>
            </name>
<styleUrl>#icon</styleUrl>
<Point>
<coordinates>
-12.8333,26.0111
</coordinates>
</Point>
</Placemark>
<Placemark>
<name>
            </name>
<styleUrl>#icon</styleUrl>
<Point>
<coordinates>
-12.8333,25.4556
</coordinates>
</Point>
</Placemark>
<Placemark>
<name>
        L (local)    </name>
<styleUrl>#icon</styleUrl>
<Point>
<coordinates>
-12.8333,24.9
</coordinates>
</Point>
</Placemark>
<Placemark>
<name>
        L (local)    </name>
<styleUrl>#icon</styleUrl>
<Point>
<coordinates>
-12.8333,24.3444
</coordinates>
</Point>
</Placemark>
<Placemark>
<name>
            </name>
<styleUrl>#icon</styleUrl>
<Point>
<coordinates>
-12.8333,23.7889
</coordinates>
</Point>
</Placemark>
<Placemark>
<name>
        L (sparse)    </name>
<styleUrl>#icon</styleUrl>
<Point>
<coordinates>
-12.8333,23.2333
</coordinates>
</Point>
</Placemark>
<Placemark>
<name>
B (local)        L (local)    </name>
<styleUrl>#icon</styleUrl>
<Point>
<coordinates>
-12.8333,22.6778
</coordinates>
</Point>
</Placemark>
<Placemark>
<name>
B (sparse)        L (partial)    </name>
<styleUrl>#icon</styleUrl>
<Point>
<coordinates>
-12.8333,22.1222
</coordinates>
</Point>
</Placemark>
<Placemark>
<name>
B (partial)    T (partial)    L (sparse)    </name>
<styleUrl>#icon</styleUrl>
<Point>
<coordinates>
-12.8333,21.5667
</coordinates>
</Point>
</Placemark>
<Placemark>
<name>
B (sparse)    T (sparse)    L (sparse)    </name>
<styleUrl>#icon</styleUrl>
<Point>
<coordinates>
-12.8333,21.0111
</coordinates>
</Point>
</Placemark>
<Placemark>
<name>
B (sparse)    T (sparse)    L (sparse)    </name>
<styleUrl>#icon</styleUrl>
<Point>
<coordinates>
-12.8333,20.4556
</coordinates>
</Point>
</Placemark>
<Placemark>
<name>
B (sparse)    T (sparse)    L (sparse)    </name>
<styleUrl>#icon</styleUrl>
<Point>
<coordinates>
-12.8333,19.9
</coordinates>
</Point>
</Placemark>
<Placemark>
<name>
B (partial)    T (partial)    L (sparse)    </name>
<styleUrl>#icon</styleUrl>
<Point>
<coordinates>
-12.8333,19.3444
</coordinates>
</Point>
</Placemark>
<Placemark>
<name>
    T (full)        </name>
<styleUrl>#icon</styleUrl>
<Point>
<coordinates>
-12.8333,18.7889
</coordinates>
</Point>
</Placemark>
<Placemark>
<name>
    T (full)        </name>
<styleUrl>#icon</styleUrl>
<Point>
<coordinates>
-12.8333,18.2333
</coordinates>
</Point>
</Placemark>
<Placemark>
<name>
    T (sparse)        </name>
<styleUrl>#icon</styleUrl>
<Point>
<coordinates>
-12.8333,17.6778
</coordinates>
</Point>
</Placemark>
<Placemark>
<name>
    T (sparse)        </name>
<styleUrl>#icon</styleUrl>
<Point>
<coordinates>
-12.8333,17.1222
</coordinates>
</Point>
</Placemark>
<Placemark>
<name>
    T (local)        </name>
<styleUrl>#icon</styleUrl>
<Point>
<coordinates>
-12.8333,16.5667
</coordinates>
</Point>
</Placemark>
<Placemark>
<name>
            </name>
<styleUrl>#icon</styleUrl>
<Point>
<coordinates>
-12.8333,16.0111
</coordinates>
</Point>
</Placemark>
<Placemark>
<name>
            </name>
<styleUrl>#icon</styleUrl>
<Point>
<coordinates>
-12.8333,15.4556
</coordinates>
</Point>
</Placemark>
<Placemark>
<name>
            </name>
<styleUrl>#icon</styleUrl>
<Point>
<coordinates>
-12.8333,14.9
</coordinates>
</Point>
</Placemark>
<Placemark>
<name>
            </name>
<styleUrl>#icon</styleUrl>
<Point>
<coordinates>
-12.8333,14.3444
</coordinates>
</Point>
</Placemark>
<Placemark>
<name>
            </name>
<styleUrl>#icon</styleUrl>
<Point>
<coordinates>
-12.8333,13.7889
</coordinates>
</Point>
</Placemark>
<Placemark>
<name>
B (sparse)    T (sparse)        </name>
<styleUrl>#icon</styleUrl>
<Point>
<coordinates>
-12,28.2333
</coordinates>
</Point>
</Placemark>
<Placemark>
<name>
B (sparse)    T (sparse)    L (sparse)    </name>
<styleUrl>#icon</styleUrl>
<Point>
<coordinates>
-12,27.6778
</coordinates>
</Point>
</Placemark>
<Placemark>
<name>
B (local)            </name>
<styleUrl>#icon</styleUrl>
<Point>
<coordinates>
-12,27.1222
</coordinates>
</Point>
</Placemark>
<Placemark>
<name>
            </name>
<styleUrl>#icon</styleUrl>
<Point>
<coordinates>
-12,26.5667
</coordinates>
</Point>
</Placemark>
<Placemark>
<name>
            </name>
<styleUrl>#icon</styleUrl>
<Point>
<coordinates>
-12,26.0111
</coordinates>
</Point>
</Placemark>
<Placemark>
<name>
            </name>
<styleUrl>#icon</styleUrl>
<Point>
<coordinates>
-12,25.4556
</coordinates>
</Point>
</Placemark>
<Placemark>
<name>
            </name>
<styleUrl>#icon</styleUrl>
<Point>
<coordinates>
-12,24.9
</coordinates>
</Point>
</Placemark>
<Placemark>
<name>
            </name>
<styleUrl>#icon</styleUrl>
<Point>
<coordinates>
-12,24.3444
</coordinates>
</Point>
</Placemark>
<Placemark>
<name>
            </name>
<styleUrl>#icon</styleUrl>
<Point>
<coordinates>
-12,23.7889
</coordinates>
</Point>
</Placemark>
<Placemark>
<name>
        L (sparse)    </name>
<styleUrl>#icon</styleUrl>
<Point>
<coordinates>
-12,23.2333
</coordinates>
</Point>
</Placemark>
<Placemark>
<name>
B (local)    T (local)    L (sparse)    </name>
<styleUrl>#icon</styleUrl>
<Point>
<coordinates>
-12,22.6778
</coordinates>
</Point>
</Placemark>
<Placemark>
<name>
B (local)    T (sparse)    L (partial)    </name>
<styleUrl>#icon</styleUrl>
<Point>
<coordinates>
-12,22.1222
</coordinates>
</Point>
</Placemark>
<Placemark>
<name>
B (sparse)    T (partial)    L (partial)    </name>
<styleUrl>#icon</styleUrl>
<Point>
<coordinates>
-12,21.5667
</coordinates>
</Point>
</Placemark>
<Placemark>
<name>
    T (sparse)    L (sparse)    </name>
<styleUrl>#icon</styleUrl>
<Point>
<coordinates>
-12,21.0111
</coordinates>
</Point>
</Placemark>
<Placemark>
<name>
B (partial)    T (full)    L (sparse)    </name>
<styleUrl>#icon</styleUrl>
<Point>
<coordinates>
-12,20.4556
</coordinates>
</Point>
</Placemark>
<Placemark>
<name>
B (partial)    T (partial)    L (sparse)    </name>
<styleUrl>#icon</styleUrl>
<Point>
<coordinates>
-12,19.9
</coordinates>
</Point>
</Placemark>
<Placemark>
<name>
B (partial)    T (partial)    L (sparse)    </name>
<styleUrl>#icon</styleUrl>
<Point>
<coordinates>
-12,19.3444
</coordinates>
</Point>
</Placemark>
<Placemark>
<name>
    T (sparse)    L (local)    </name>
<styleUrl>#icon</styleUrl>
<Point>
<coordinates>
-12,18.7889
</coordinates>
</Point>
</Placemark>
<Placemark>
<name>
    T (sparse)        </name>
<styleUrl>#icon</styleUrl>
<Point>
<coordinates>
-12,18.2333
</coordinates>
</Point>
</Placemark>
<Placemark>
<name>
    T (sparse)        </name>
<styleUrl>#icon</styleUrl>
<Point>
<coordinates>
-12,17.6778
</coordinates>
</Point>
</Placemark>
<Placemark>
<name>
    T (sparse)        </name>
<styleUrl>#icon</styleUrl>
<Point>
<coordinates>
-12,17.1222
</coordinates>
</Point>
</Placemark>
<Placemark>
<name>
    T (local)        </name>
<styleUrl>#icon</styleUrl>
<Point>
<coordinates>
-12,16.5667
</coordinates>
</Point>
</Placemark>
<Placemark>
<name>
    T (local)        </name>
<styleUrl>#icon</styleUrl>
<Point>
<coordinates>
-12,16.0111
</coordinates>
</Point>
</Placemark>
<Placemark>
<name>
            </name>
<styleUrl>#icon</styleUrl>
<Point>
<coordinates>
-12,15.4556
</coordinates>
</Point>
</Placemark>
<Placemark>
<name>
            </name>
<styleUrl>#icon</styleUrl>
<Point>
<coordinates>
-12,14.9
</coordinates>
</Point>
</Placemark>
<Placemark>
<name>
            </name>
<styleUrl>#icon</styleUrl>
<Point>
<coordinates>
-12,14.3444
</coordinates>
</Point>
</Placemark>
<Placemark>
<name>
            </name>
<styleUrl>#icon</styleUrl>
<Point>
<coordinates>
-12,13.7889
</coordinates>
</Point>
</Placemark>
<Placemark>
<name>
            </name>
<styleUrl>#icon</styleUrl>
<Point>
<coordinates>
-11.1667,28.2333
</coordinates>
</Point>
</Placemark>
<Placemark>
<name>
            </name>
<styleUrl>#icon</styleUrl>
<Point>
<coordinates>
-11.1667,27.6778
</coordinates>
</Point>
</Placemark>
<Placemark>
<name>
            </name>
<styleUrl>#icon</styleUrl>
<Point>
<coordinates>
-11.1667,27.1222
</coordinates>
</Point>
</Placemark>
<Placemark>
<name>
            </name>
<styleUrl>#icon</styleUrl>
<Point>
<coordinates>
-11.1667,26.5667
</coordinates>
</Point>
</Placemark>
<Placemark>
<name>
            </name>
<styleUrl>#icon</styleUrl>
<Point>
<coordinates>
-11.1667,26.0111
</coordinates>
</Point>
</Placemark>
<Placemark>
<name>
            </name>
<styleUrl>#icon</styleUrl>
<Point>
<coordinates>
-11.1667,25.4556
</coordinates>
</Point>
</Placemark>
<Placemark>
<name>
            </name>
<styleUrl>#icon</styleUrl>
<Point>
<coordinates>
-11.1667,24.9
</coordinates>
</Point>
</Placemark>
<Placemark>
<name>
            </name>
<styleUrl>#icon</styleUrl>
<Point>
<coordinates>
-11.1667,24.3444
</coordinates>
</Point>
</Placemark>
<Placemark>
<name>
        L (sparse)    </name>
<styleUrl>#icon</styleUrl>
<Point>
<coordinates>
-11.1667,23.7889
</coordinates>
</Point>
</Placemark>
<Placemark>
<name>
B (local)    T (sparse)    L (sparse)    </name>
<styleUrl>#icon</styleUrl>
<Point>
<coordinates>
-11.1667,23.2333
</coordinates>
</Point>
</Placemark>
<Placemark>
<name>
        L (sparse)    </name>
<styleUrl>#icon</styleUrl>
<Point>
<coordinates>
-11.1667,22.6778
</coordinates>
</Point>
</Placemark>
<Placemark>
<name>
        L (full)    </name>
<styleUrl>#icon</styleUrl>
<Point>
<coordinates>
-11.1667,22.1222
</coordinates>
</Point>
</Placemark>
<Placemark>
<name>
    T (sparse)    L (sparse)    </name>
<styleUrl>#icon</styleUrl>
<Point>
<coordinates>
-11.1667,21.5667
</coordinates>
</Point>
</Placemark>
<Placemark>
<name>
B (local)    T (partial)    L (partial)    </name>
<styleUrl>#icon</styleUrl>
<Point>
<coordinates>
-11.1667,21.0111
</coordinates>
</Point>
</Placemark>
<Placemark>
<name>
    T (full)    L (full)    </name>
<styleUrl>#icon</styleUrl>
<Point>
<coordinates>
-11.1667,20.4556
</coordinates>
</Point>
</Placemark>
<Placemark>
<name>
B (partial)    T (full)    L (sparse)    </name>
<styleUrl>#icon</styleUrl>
<Point>
<coordinates>
-11.1667,19.9
</coordinates>
</Point>
</Placemark>
<Placemark>
<name>
B (partial)    T (partial)        </name>
<styleUrl>#icon</styleUrl>
<Point>
<coordinates>
-11.1667,19.3444
</coordinates>
</Point>
</Placemark>
<Placemark>
<name>
        L (sparse)    </name>
<styleUrl>#icon</styleUrl>
<Point>
<coordinates>
-11.1667,18.7889
</coordinates>
</Point>
</Placemark>
<Placemark>
<name>
    T (partial)        </name>
<styleUrl>#icon</styleUrl>
<Point>
<coordinates>
-11.1667,18.2333
</coordinates>
</Point>
</Placemark>
<Placemark>
<name>
    T (partial)        </name>
<styleUrl>#icon</styleUrl>
<Point>
<coordinates>
-11.1667,17.6778
</coordinates>
</Point>
</Placemark>
<Placemark>
<name>
    T (partial)    L (sparse)    </name>
<styleUrl>#icon</styleUrl>
<Point>
<coordinates>
-11.1667,17.1222
</coordinates>
</Point>
</Placemark>
<Placemark>
<name>
    T (local)    L (sparse)    </name>
<styleUrl>#icon</styleUrl>
<Point>
<coordinates>
-11.1667,16.5667
</coordinates>
</Point>
</Placemark>
<Placemark>
<name>
    T (local)    L (sparse)    </name>
<styleUrl>#icon</styleUrl>
<Point>
<coordinates>
-11.1667,16.0111
</coordinates>
</Point>
</Placemark>
<Placemark>
<name>
            </name>
<styleUrl>#icon</styleUrl>
<Point>
<coordinates>
-11.1667,15.4556
</coordinates>
</Point>
</Placemark>
<Placemark>
<name>
            </name>
<styleUrl>#icon</styleUrl>
<Point>
<coordinates>
-11.1667,14.9
</coordinates>
</Point>
</Placemark>
<Placemark>
<name>
            </name>
<styleUrl>#icon</styleUrl>
<Point>
<coordinates>
-11.1667,14.3444
</coordinates>
</Point>
</Placemark>
<Placemark>
<name>
            </name>
<styleUrl>#icon</styleUrl>
<Point>
<coordinates>
-11.1667,13.7889
</coordinates>
</Point>
</Placemark>
<Placemark>
<name>
        L (local)    </name>
<styleUrl>#icon</styleUrl>
<Point>
<coordinates>
-10.3333,28.7889
</coordinates>
</Point>
</Placemark>
<Placemark>
<name>
            </name>
<styleUrl>#icon</styleUrl>
<Point>
<coordinates>
-10.3333,28.2333
</coordinates>
</Point>
</Placemark>
<Placemark>
<name>
            </name>
<styleUrl>#icon</styleUrl>
<Point>
<coordinates>
-10.3333,27.6778
</coordinates>
</Point>
</Placemark>
<Placemark>
<name>
            </name>
<styleUrl>#icon</styleUrl>
<Point>
<coordinates>
-10.3333,27.1222
</coordinates>
</Point>
</Placemark>
<Placemark>
<name>
            </name>
<styleUrl>#icon</styleUrl>
<Point>
<coordinates>
-10.3333,26.5667
</coordinates>
</Point>
</Placemark>
<Placemark>
<name>
            </name>
<styleUrl>#icon</styleUrl>
<Point>
<coordinates>
-10.3333,26.0111
</coordinates>
</Point>
</Placemark>
<Placemark>
<name>
            </name>
<styleUrl>#icon</styleUrl>
<Point>
<coordinates>
-10.3333,25.4556
</coordinates>
</Point>
</Placemark>
<Placemark>
<name>
            </name>
<styleUrl>#icon</styleUrl>
<Point>
<coordinates>
-10.3333,24.9
</coordinates>
</Point>
</Placemark>
<Placemark>
<name>
        L (local)    </name>
<styleUrl>#icon</styleUrl>
<Point>
<coordinates>
-10.3333,24.3444
</coordinates>
</Point>
</Placemark>
<Placemark>
<name>
        L (sparse)    </name>
<styleUrl>#icon</styleUrl>
<Point>
<coordinates>
-10.3333,23.7889
</coordinates>
</Point>
</Placemark>
<Placemark>
<name>
    T (local)    L (sparse)    </name>
<styleUrl>#icon</styleUrl>
<Point>
<coordinates>
-10.3333,23.2333
</coordinates>
</Point>
</Placemark>
<Placemark>
<name>
        L (partial)    </name>
<styleUrl>#icon</styleUrl>
<Point>
<coordinates>
-10.3333,22.6778
</coordinates>
</Point>
</Placemark>
<Placemark>
<name>
        L (full)    </name>
<styleUrl>#icon</styleUrl>
<Point>
<coordinates>
-10.3333,22.1222
</coordinates>
</Point>
</Placemark>
<Placemark>
<name>
    T (local)    L (partial)    </name>
<styleUrl>#icon</styleUrl>
<Point>
<coordinates>
-10.3333,21.5667
</coordinates>
</Point>
</Placemark>
<Placemark>
<name>
        L (full)    </name>
<styleUrl>#icon</styleUrl>
<Point>
<coordinates>
-10.3333,21.0111
</coordinates>
</Point>
</Placemark>
<Placemark>
<name>
    T (partial)    L (partial)    </name>
<styleUrl>#icon</styleUrl>
<Point>
<coordinates>
-10.3333,20.4556
</coordinates>
</Point>
</Placemark>
<Placemark>
<name>
    T (full)    L (partial)    </name>
<styleUrl>#icon</styleUrl>
<Point>
<coordinates>
-10.3333,19.9
</coordinates>
</Point>
</Placemark>
<Placemark>
<name>
    T (partial)    L (sparse)    </name>
<styleUrl>#icon</styleUrl>
<Point>
<coordinates>
-10.3333,19.3444
</coordinates>
</Point>
</Placemark>
<Placemark>
<name>
    T (partial)    L (partial)    </name>
<styleUrl>#icon</styleUrl>
<Point>
<coordinates>
-10.3333,18.7889
</coordinates>
</Point>
</Placemark>
<Placemark>
<name>
B (local)    T (full)        </name>
<styleUrl>#icon</styleUrl>
<Point>
<coordinates>
-10.3333,18.2333
</coordinates>
</Point>
</Placemark>
<Placemark>
<name>
    T (partial)        </name>
<styleUrl>#icon</styleUrl>
<Point>
<coordinates>
-10.3333,17.6778
</coordinates>
</Point>
</Placemark>
<Placemark>
<name>
    T (sparse)        </name>
<styleUrl>#icon</styleUrl>
<Point>
<coordinates>
-10.3333,17.1222
</coordinates>
</Point>
</Placemark>
<Placemark>
<name>
    T (local)        </name>
<styleUrl>#icon</styleUrl>
<Point>
<coordinates>
-10.3333,16.5667
</coordinates>
</Point>
</Placemark>
<Placemark>
<name>
    T (local)        </name>
<styleUrl>#icon</styleUrl>
<Point>
<coordinates>
-10.3333,16.0111
</coordinates>
</Point>
</Placemark>
<Placemark>
<name>
            </name>
<styleUrl>#icon</styleUrl>
<Point>
<coordinates>
-10.3333,15.4556
</coordinates>
</Point>
</Placemark>
<Placemark>
<name>
            </name>
<styleUrl>#icon</styleUrl>
<Point>
<coordinates>
-10.3333,14.9
</coordinates>
</Point>
</Placemark>
<Placemark>
<name>
            </name>
<styleUrl>#icon</styleUrl>
<Point>
<coordinates>
-10.3333,14.3444
</coordinates>
</Point>
</Placemark>
<Placemark>
<name>
            </name>
<styleUrl>#icon</styleUrl>
<Point>
<coordinates>
-10.3333,13.7889
</coordinates>
</Point>
</Placemark>
<Placemark>
<name>
B (local)    T (local)        </name>
<styleUrl>#icon</styleUrl>
<Point>
<coordinates>
-9.5,31.5667
</coordinates>
</Point>
</Placemark>
<Placemark>
<name>
    T (local)        </name>
<styleUrl>#icon</styleUrl>
<Point>
<coordinates>
-9.5,31.0111
</coordinates>
</Point>
</Placemark>
<Placemark>
<name>
    T (local)        </name>
<styleUrl>#icon</styleUrl>
<Point>
<coordinates>
-9.5,30.4556
</coordinates>
</Point>
</Placemark>
<Placemark>
<name>
    T (local)        </name>
<styleUrl>#icon</styleUrl>
<Point>
<coordinates>
-9.5,29.9
</coordinates>
</Point>
</Placemark>
<Placemark>
<name>
            </name>
<styleUrl>#icon</styleUrl>
<Point>
<coordinates>
-9.5,29.3444
</coordinates>
</Point>
</Placemark>
<Placemark>
<name>
            </name>
<styleUrl>#icon</styleUrl>
<Point>
<coordinates>
-9.5,28.7889
</coordinates>
</Point>
</Placemark>
<Placemark>
<name>
            </name>
<styleUrl>#icon</styleUrl>
<Point>
<coordinates>
-9.5,28.2333
</coordinates>
</Point>
</Placemark>
<Placemark>
<name>
            </name>
<styleUrl>#icon</styleUrl>
<Point>
<coordinates>
-9.5,27.6778
</coordinates>
</Point>
</Placemark>
<Placemark>
<name>
            </name>
<styleUrl>#icon</styleUrl>
<Point>
<coordinates>
-9.5,27.1222
</coordinates>
</Point>
</Placemark>
<Placemark>
<name>
            </name>
<styleUrl>#icon</styleUrl>
<Point>
<coordinates>
-9.5,26.5667
</coordinates>
</Point>
</Placemark>
<Placemark>
<name>
            </name>
<styleUrl>#icon</styleUrl>
<Point>
<coordinates>
-9.5,26.0111
</coordinates>
</Point>
</Placemark>
<Placemark>
<name>
            </name>
<styleUrl>#icon</styleUrl>
<Point>
<coordinates>
-9.5,25.4556
</coordinates>
</Point>
</Placemark>
<Placemark>
<name>
            </name>
<styleUrl>#icon</styleUrl>
<Point>
<coordinates>
-9.5,24.9
</coordinates>
</Point>
</Placemark>
<Placemark>
<name>
            </name>
<styleUrl>#icon</styleUrl>
<Point>
<coordinates>
-9.5,24.3444
</coordinates>
</Point>
</Placemark>
<Placemark>
<name>
        L (local)    </name>
<styleUrl>#icon</styleUrl>
<Point>
<coordinates>
-9.5,23.7889
</coordinates>
</Point>
</Placemark>
<Placemark>
<name>
            </name>
<styleUrl>#icon</styleUrl>
<Point>
<coordinates>
-9.5,23.2333
</coordinates>
</Point>
</Placemark>
<Placemark>
<name>
        L (partial)    </name>
<styleUrl>#icon</styleUrl>
<Point>
<coordinates>
-9.5,22.6778
</coordinates>
</Point>
</Placemark>
<Placemark>
<name>
        L (full)    </name>
<styleUrl>#icon</styleUrl>
<Point>
<coordinates>
-9.5,22.1222
</coordinates>
</Point>
</Placemark>
<Placemark>
<name>
        L (full)    </name>
<styleUrl>#icon</styleUrl>
<Point>
<coordinates>
-9.5,21.5667
</coordinates>
</Point>
</Placemark>
<Placemark>
<name>
        L (full)    </name>
<styleUrl>#icon</styleUrl>
<Point>
<coordinates>
-9.5,21.0111
</coordinates>
</Point>
</Placemark>
<Placemark>
<name>
        L (full)    </name>
<styleUrl>#icon</styleUrl>
<Point>
<coordinates>
-9.5,20.4556
</coordinates>
</Point>
</Placemark>
<Placemark>
<name>
        L (sparse)    </name>
<styleUrl>#icon</styleUrl>
<Point>
<coordinates>
-9.5,19.9
</coordinates>
</Point>
</Placemark>
<Placemark>
<name>
    T (sparse)    L (sparse)    </name>
<styleUrl>#icon</styleUrl>
<Point>
<coordinates>
-9.5,19.3444
</coordinates>
</Point>
</Placemark>
<Placemark>
<name>
B (local)    T (full)    L (sparse)    </name>
<styleUrl>#icon</styleUrl>
<Point>
<coordinates>
-9.5,18.7889
</coordinates>
</Point>
</Placemark>
<Placemark>
<name>
    T (full)        </name>
<styleUrl>#icon</styleUrl>
<Point>
<coordinates>
-9.5,18.2333
</coordinates>
</Point>
</Placemark>
<Placemark>
<name>
    T (partial)        </name>
<styleUrl>#icon</styleUrl>
<Point>
<coordinates>
-9.5,17.6778
</coordinates>
</Point>
</Placemark>
<Placemark>
<name>
    T (sparse)        </name>
<styleUrl>#icon</styleUrl>
<Point>
<coordinates>
-9.5,17.1222
</coordinates>
</Point>
</Placemark>
<Placemark>
<name>
    T (local)        </name>
<styleUrl>#icon</styleUrl>
<Point>
<coordinates>
-9.5,16.5667
</coordinates>
</Point>
</Placemark>
<Placemark>
<name>
    T (local)        </name>
<styleUrl>#icon</styleUrl>
<Point>
<coordinates>
-9.5,16.0111
</coordinates>
</Point>
</Placemark>
<Placemark>
<name>
            </name>
<styleUrl>#icon</styleUrl>
<Point>
<coordinates>
-9.5,15.4556
</coordinates>
</Point>
</Placemark>
<Placemark>
<name>
            </name>
<styleUrl>#icon</styleUrl>
<Point>
<coordinates>
-9.5,14.9
</coordinates>
</Point>
</Placemark>
<Placemark>
<name>
            </name>
<styleUrl>#icon</styleUrl>
<Point>
<coordinates>
-9.5,14.3444
</coordinates>
</Point>
</Placemark>
<Placemark>
<name>
            </name>
<styleUrl>#icon</styleUrl>
<Point>
<coordinates>
-9.5,13.7889
</coordinates>
</Point>
</Placemark>
<Placemark>
<name>
            </name>
<styleUrl>#icon</styleUrl>
<Point>
<coordinates>
-8.6667,32.6778
</coordinates>
</Point>
</Placemark>
<Placemark>
<name>
            </name>
<styleUrl>#icon</styleUrl>
<Point>
<coordinates>
-8.6667,32.1222
</coordinates>
</Point>
</Placemark>
<Placemark>
<name>
            </name>
<styleUrl>#icon</styleUrl>
<Point>
<coordinates>
-8.6667,31.5667
</coordinates>
</Point>
</Placemark>
<Placemark>
<name>
            </name>
<styleUrl>#icon</styleUrl>
<Point>
<coordinates>
-8.6667,31.0111
</coordinates>
</Point>
</Placemark>
<Placemark>
<name>
            </name>
<styleUrl>#icon</styleUrl>
<Point>
<coordinates>
-8.6667,30.4556
</coordinates>
</Point>
</Placemark>
<Placemark>
<name>
            </name>
<styleUrl>#icon</styleUrl>
<Point>
<coordinates>
-8.6667,29.9
</coordinates>
</Point>
</Placemark>
<Placemark>
<name>
            </name>
<styleUrl>#icon</styleUrl>
<Point>
<coordinates>
-8.6667,29.3444
</coordinates>
</Point>
</Placemark>
<Placemark>
<name>
            </name>
<styleUrl>#icon</styleUrl>
<Point>
<coordinates>
-8.6667,28.7889
</coordinates>
</Point>
</Placemark>
<Placemark>
<name>
            </name>
<styleUrl>#icon</styleUrl>
<Point>
<coordinates>
-8.6667,28.2333
</coordinates>
</Point>
</Placemark>
<Placemark>
<name>
            </name>
<styleUrl>#icon</styleUrl>
<Point>
<coordinates>
-8.6667,27.6778
</coordinates>
</Point>
</Placemark>
<Placemark>
<name>
            </name>
<styleUrl>#icon</styleUrl>
<Point>
<coordinates>
-8.6667,27.1222
</coordinates>
</Point>
</Placemark>
<Placemark>
<name>
            </name>
<styleUrl>#icon</styleUrl>
<Point>
<coordinates>
-8.6667,26.5667
</coordinates>
</Point>
</Placemark>
<Placemark>
<name>
            </name>
<styleUrl>#icon</styleUrl>
<Point>
<coordinates>
-8.6667,26.0111
</coordinates>
</Point>
</Placemark>
<Placemark>
<name>
            </name>
<styleUrl>#icon</styleUrl>
<Point>
<coordinates>
-8.6667,25.4556
</coordinates>
</Point>
</Placemark>
<Placemark>
<name>
            </name>
<styleUrl>#icon</styleUrl>
<Point>
<coordinates>
-8.6667,24.9
</coordinates>
</Point>
</Placemark>
<Placemark>
<name>
            </name>
<styleUrl>#icon</styleUrl>
<Point>
<coordinates>
-8.6667,24.3444
</coordinates>
</Point>
</Placemark>
<Placemark>
<name>
            </name>
<styleUrl>#icon</styleUrl>
<Point>
<coordinates>
-8.6667,23.7889
</coordinates>
</Point>
</Placemark>
<Placemark>
<name>
        L (local)    </name>
<styleUrl>#icon</styleUrl>
<Point>
<coordinates>
-8.6667,23.2333
</coordinates>
</Point>
</Placemark>
<Placemark>
<name>
    T (local)    L (partial)    </name>
<styleUrl>#icon</styleUrl>
<Point>
<coordinates>
-8.6667,22.6778
</coordinates>
</Point>
</Placemark>
<Placemark>
<name>
        L (partial)    </name>
<styleUrl>#icon</styleUrl>
<Point>
<coordinates>
-8.6667,22.1222
</coordinates>
</Point>
</Placemark>
<Placemark>
<name>
        L (full)    </name>
<styleUrl>#icon</styleUrl>
<Point>
<coordinates>
-8.6667,21.5667
</coordinates>
</Point>
</Placemark>
<Placemark>
<name>
        L (full)    </name>
<styleUrl>#icon</styleUrl>
<Point>
<coordinates>
-8.6667,21.0111
</coordinates>
</Point>
</Placemark>
<Placemark>
<name>
        L (full)    </name>
<styleUrl>#icon</styleUrl>
<Point>
<coordinates>
-8.6667,20.4556
</coordinates>
</Point>
</Placemark>
<Placemark>
<name>
        L (sparse)    </name>
<styleUrl>#icon</styleUrl>
<Point>
<coordinates>
-8.6667,19.9
</coordinates>
</Point>
</Placemark>
<Placemark>
<name>
        L (sparse)    </name>
<styleUrl>#icon</styleUrl>
<Point>
<coordinates>
-8.6667,19.3444
</coordinates>
</Point>
</Placemark>
<Placemark>
<name>
    T (sparse)    L (sparse)    </name>
<styleUrl>#icon</styleUrl>
<Point>
<coordinates>
-8.6667,18.7889
</coordinates>
</Point>
</Placemark>
<Placemark>
<name>
    T (full)        </name>
<styleUrl>#icon</styleUrl>
<Point>
<coordinates>
-8.6667,18.2333
</coordinates>
</Point>
</Placemark>
<Placemark>
<name>
    T (partial)        </name>
<styleUrl>#icon</styleUrl>
<Point>
<coordinates>
-8.6667,17.6778
</coordinates>
</Point>
</Placemark>
<Placemark>
<name>
    T (sparse)        </name>
<styleUrl>#icon</styleUrl>
<Point>
<coordinates>
-8.6667,17.1222
</coordinates>
</Point>
</Placemark>
<Placemark>
<name>
    T (local)        </name>
<styleUrl>#icon</styleUrl>
<Point>
<coordinates>
-8.6667,16.5667
</coordinates>
</Point>
</Placemark>
<Placemark>
<name>
    T (local)        </name>
<styleUrl>#icon</styleUrl>
<Point>
<coordinates>
-8.6667,16.0111
</coordinates>
</Point>
</Placemark>
<Placemark>
<name>
            </name>
<styleUrl>#icon</styleUrl>
<Point>
<coordinates>
-8.6667,15.4556
</coordinates>
</Point>
</Placemark>
<Placemark>
<name>
            </name>
<styleUrl>#icon</styleUrl>
<Point>
<coordinates>
-8.6667,14.9
</coordinates>
</Point>
</Placemark>
<Placemark>
<name>
            </name>
<styleUrl>#icon</styleUrl>
<Point>
<coordinates>
-8.6667,14.3444
</coordinates>
</Point>
</Placemark>
<Placemark>
<name>
            </name>
<styleUrl>#icon</styleUrl>
<Point>
<coordinates>
-8.6667,13.7889
</coordinates>
</Point>
</Placemark>
<Placemark>
<name>
            </name>
<styleUrl>#icon</styleUrl>
<Point>
<coordinates>
-7.8333,32.6778
</coordinates>
</Point>
</Placemark>
<Placemark>
<name>
            </name>
<styleUrl>#icon</styleUrl>
<Point>
<coordinates>
-7.8333,32.1222
</coordinates>
</Point>
</Placemark>
<Placemark>
<name>
            </name>
<styleUrl>#icon</styleUrl>
<Point>
<coordinates>
-7.8333,30.4556
</coordinates>
</Point>
</Placemark>
<Placemark>
<name>
            </name>
<styleUrl>#icon</styleUrl>
<Point>
<coordinates>
-7.8333,29.9
</coordinates>
</Point>
</Placemark>
<Placemark>
<name>
            </name>
<styleUrl>#icon</styleUrl>
<Point>
<coordinates>
-7.8333,29.3444
</coordinates>
</Point>
</Placemark>
<Placemark>
<name>
            </name>
<styleUrl>#icon</styleUrl>
<Point>
<coordinates>
-7.8333,28.7889
</coordinates>
</Point>
</Placemark>
<Placemark>
<name>
            </name>
<styleUrl>#icon</styleUrl>
<Point>
<coordinates>
-7.8333,28.2333
</coordinates>
</Point>
</Placemark>
<Placemark>
<name>
            </name>
<styleUrl>#icon</styleUrl>
<Point>
<coordinates>
-7.8333,27.6778
</coordinates>
</Point>
</Placemark>
<Placemark>
<name>
B (local)    T (local)        </name>
<styleUrl>#icon</styleUrl>
<Point>
<coordinates>
-7.8333,27.1222
</coordinates>
</Point>
</Placemark>
<Placemark>
<name>
B (local)    T (local)        </name>
<styleUrl>#icon</styleUrl>
<Point>
<coordinates>
-7.8333,26.5667
</coordinates>
</Point>
</Placemark>
<Placemark>
<name>
            </name>
<styleUrl>#icon</styleUrl>
<Point>
<coordinates>
-7.8333,26.0111
</coordinates>
</Point>
</Placemark>
<Placemark>
<name>
        L (local)    </name>
<styleUrl>#icon</styleUrl>
<Point>
<coordinates>
-7.8333,25.4556
</coordinates>
</Point>
</Placemark>
<Placemark>
<name>
    T (sparse)    L (sparse)    </name>
<styleUrl>#icon</styleUrl>
<Point>
<coordinates>
-7.8333,24.9
</coordinates>
</Point>
</Placemark>
<Placemark>
<name>
            </name>
<styleUrl>#icon</styleUrl>
<Point>
<coordinates>
-7.8333,24.3444
</coordinates>
</Point>
</Placemark>
<Placemark>
<name>
            </name>
<styleUrl>#icon</styleUrl>
<Point>
<coordinates>
-7.8333,23.7889
</coordinates>
</Point>
</Placemark>
<Placemark>
<name>
    T (local)    L (sparse)    </name>
<styleUrl>#icon</styleUrl>
<Point>
<coordinates>
-7.8333,23.2333
</coordinates>
</Point>
</Placemark>
<Placemark>
<name>
    T (sparse)    L (partial)    </name>
<styleUrl>#icon</styleUrl>
<Point>
<coordinates>
-7.8333,22.6778
</coordinates>
</Point>
</Placemark>
<Placemark>
<name>
    T (local)    L (partial)    </name>
<styleUrl>#icon</styleUrl>
<Point>
<coordinates>
-7.8333,22.1222
</coordinates>
</Point>
</Placemark>
<Placemark>
<name>
        L (full)    </name>
<styleUrl>#icon</styleUrl>
<Point>
<coordinates>
-7.8333,21.5667
</coordinates>
</Point>
</Placemark>
<Placemark>
<name>
        L (full)    </name>
<styleUrl>#icon</styleUrl>
<Point>
<coordinates>
-7.8333,21.0111
</coordinates>
</Point>
</Placemark>
<Placemark>
<name>
        L (sparse)    </name>
<styleUrl>#icon</styleUrl>
<Point>
<coordinates>
-7.8333,20.4556
</coordinates>
</Point>
</Placemark>
<Placemark>
<name>
            </name>
<styleUrl>#icon</styleUrl>
<Point>
<coordinates>
-7.8333,19.9
</coordinates>
</Point>
</Placemark>
<Placemark>
<name>
            </name>
<styleUrl>#icon</styleUrl>
<Point>
<coordinates>
-7.8333,19.3444
</coordinates>
</Point>
</Placemark>
<Placemark>
<name>
B (local)    T (partial)    L (sparse)    </name>
<styleUrl>#icon</styleUrl>
<Point>
<coordinates>
-7.8333,18.7889
</coordinates>
</Point>
</Placemark>
<Placemark>
<name>
B (local)    T (sparse)    L (local)    </name>
<styleUrl>#icon</styleUrl>
<Point>
<coordinates>
-7.8333,18.2333
</coordinates>
</Point>
</Placemark>
<Placemark>
<name>
B (sparse)    T (full)        </name>
<styleUrl>#icon</styleUrl>
<Point>
<coordinates>
-7.8333,17.6778
</coordinates>
</Point>
</Placemark>
<Placemark>
<name>
    T (partial)        </name>
<styleUrl>#icon</styleUrl>
<Point>
<coordinates>
-7.8333,17.1222
</coordinates>
</Point>
</Placemark>
<Placemark>
<name>
    T (local)        </name>
<styleUrl>#icon</styleUrl>
<Point>
<coordinates>
-7.8333,16.5667
</coordinates>
</Point>
</Placemark>
<Placemark>
<name>
    T (local)        </name>
<styleUrl>#icon</styleUrl>
<Point>
<coordinates>
-7.8333,16.0111
</coordinates>
</Point>
</Placemark>
<Placemark>
<name>
            </name>
<styleUrl>#icon</styleUrl>
<Point>
<coordinates>
-7.8333,15.4556
</coordinates>
</Point>
</Placemark>
<Placemark>
<name>
            </name>
<styleUrl>#icon</styleUrl>
<Point>
<coordinates>
-7.8333,14.9
</coordinates>
</Point>
</Placemark>
<Placemark>
<name>
            </name>
<styleUrl>#icon</styleUrl>
<Point>
<coordinates>
-7.8333,14.3444
</coordinates>
</Point>
</Placemark>
<Placemark>
<name>
            </name>
<styleUrl>#icon</styleUrl>
<Point>
<coordinates>
-7.8333,13.7889
</coordinates>
</Point>
</Placemark>
<Placemark>
<name>
            </name>
<styleUrl>#icon</styleUrl>
<Point>
<coordinates>
-7.8333,13.2333
</coordinates>
</Point>
</Placemark>
<Placemark>
<name>
            </name>
<styleUrl>#icon</styleUrl>
<Point>
<coordinates>
-7,32.6778
</coordinates>
</Point>
</Placemark>
<Placemark>
<name>
            </name>
<styleUrl>#icon</styleUrl>
<Point>
<coordinates>
-7,30.4556
</coordinates>
</Point>
</Placemark>
<Placemark>
<name>
            </name>
<styleUrl>#icon</styleUrl>
<Point>
<coordinates>
-7,29.9
</coordinates>
</Point>
</Placemark>
<Placemark>
<name>
B (local)    T (sparse)        S (local)</name>
<styleUrl>#icon</styleUrl>
<Point>
<coordinates>
-7,29.3444
</coordinates>
</Point>
</Placemark>
<Placemark>
<name>
        L (local)    </name>
<styleUrl>#icon</styleUrl>
<Point>
<coordinates>
-7,28.7889
</coordinates>
</Point>
</Placemark>
<Placemark>
<name>
    T (sparse)        S (local)</name>
<styleUrl>#icon</styleUrl>
<Point>
<coordinates>
-7,28.2333
</coordinates>
</Point>
</Placemark>
<Placemark>
<name>
    T (sparse)    L (sparse)    </name>
<styleUrl>#icon</styleUrl>
<Point>
<coordinates>
-7,27.6778
</coordinates>
</Point>
</Placemark>
<Placemark>
<name>
B (local)    T (sparse)        </name>
<styleUrl>#icon</styleUrl>
<Point>
<coordinates>
-7,27.1222
</coordinates>
</Point>
</Placemark>
<Placemark>
<name>
        L (local)    </name>
<styleUrl>#icon</styleUrl>
<Point>
<coordinates>
-7,26.5667
</coordinates>
</Point>
</Placemark>
<Placemark>
<name>
        L (sparse)    </name>
<styleUrl>#icon</styleUrl>
<Point>
<coordinates>
-7,26.0111
</coordinates>
</Point>
</Placemark>
<Placemark>
<name>
        L (sparse)    </name>
<styleUrl>#icon</styleUrl>
<Point>
<coordinates>
-7,25.4556
</coordinates>
</Point>
</Placemark>
<Placemark>
<name>
    T (sparse)    L (sparse)    </name>
<styleUrl>#icon</styleUrl>
<Point>
<coordinates>
-7,24.9
</coordinates>
</Point>
</Placemark>
<Placemark>
<name>
            </name>
<styleUrl>#icon</styleUrl>
<Point>
<coordinates>
-7,24.3444
</coordinates>
</Point>
</Placemark>
<Placemark>
<name>
        L (sparse)    </name>
<styleUrl>#icon</styleUrl>
<Point>
<coordinates>
-7,23.7889
</coordinates>
</Point>
</Placemark>
<Placemark>
<name>
        L (partial)    </name>
<styleUrl>#icon</styleUrl>
<Point>
<coordinates>
-7,23.2333
</coordinates>
</Point>
</Placemark>
<Placemark>
<name>
    T (sparse)    L (sparse)    </name>
<styleUrl>#icon</styleUrl>
<Point>
<coordinates>
-7,22.6778
</coordinates>
</Point>
</Placemark>
<Placemark>
<name>
B (local)    T (sparse)    L (partial)    </name>
<styleUrl>#icon</styleUrl>
<Point>
<coordinates>
-7,22.1222
</coordinates>
</Point>
</Placemark>
<Placemark>
<name>
B (local)    T (local)    L (partial)    </name>
<styleUrl>#icon</styleUrl>
<Point>
<coordinates>
-7,21.5667
</coordinates>
</Point>
</Placemark>
<Placemark>
<name>
        L (partial)    </name>
<styleUrl>#icon</styleUrl>
<Point>
<coordinates>
-7,21.0111
</coordinates>
</Point>
</Placemark>
<Placemark>
<name>
        L (sparse)    </name>
<styleUrl>#icon</styleUrl>
<Point>
<coordinates>
-7,20.4556
</coordinates>
</Point>
</Placemark>
<Placemark>
<name>
            </name>
<styleUrl>#icon</styleUrl>
<Point>
<coordinates>
-7,19.9
</coordinates>
</Point>
</Placemark>
<Placemark>
<name>
            </name>
<styleUrl>#icon</styleUrl>
<Point>
<coordinates>
-7,19.3444
</coordinates>
</Point>
</Placemark>
<Placemark>
<name>
    T (full)        </name>
<styleUrl>#icon</styleUrl>
<Point>
<coordinates>
-7,18.7889
</coordinates>
</Point>
</Placemark>
<Placemark>
<name>
    T (partial)        </name>
<styleUrl>#icon</styleUrl>
<Point>
<coordinates>
-7,18.2333
</coordinates>
</Point>
</Placemark>
<Placemark>
<name>
B (local)    T (sparse)        </name>
<styleUrl>#icon</styleUrl>
<Point>
<coordinates>
-7,17.6778
</coordinates>
</Point>
</Placemark>
<Placemark>
<name>
    T (sparse)        </name>
<styleUrl>#icon</styleUrl>
<Point>
<coordinates>
-7,17.1222
</coordinates>
</Point>
</Placemark>
<Placemark>
<name>
    T (local)        </name>
<styleUrl>#icon</styleUrl>
<Point>
<coordinates>
-7,16.5667
</coordinates>
</Point>
</Placemark>
<Placemark>
<name>
            </name>
<styleUrl>#icon</styleUrl>
<Point>
<coordinates>
-7,16.0111
</coordinates>
</Point>
</Placemark>
<Placemark>
<name>
            </name>
<styleUrl>#icon</styleUrl>
<Point>
<coordinates>
-7,15.4556
</coordinates>
</Point>
</Placemark>
<Placemark>
<name>
            </name>
<styleUrl>#icon</styleUrl>
<Point>
<coordinates>
-7,14.9
</coordinates>
</Point>
</Placemark>
<Placemark>
<name>
            </name>
<styleUrl>#icon</styleUrl>
<Point>
<coordinates>
-7,14.3444
</coordinates>
</Point>
</Placemark>
<Placemark>
<name>
            </name>
<styleUrl>#icon</styleUrl>
<Point>
<coordinates>
-7,13.7889
</coordinates>
</Point>
</Placemark>
<Placemark>
<name>
            </name>
<styleUrl>#icon</styleUrl>
<Point>
<coordinates>
-7,13.2333
</coordinates>
</Point>
</Placemark>
<Placemark>
<name>
            </name>
<styleUrl>#icon</styleUrl>
<Point>
<coordinates>
-6.1667,39.9
</coordinates>
</Point>
</Placemark>
<Placemark>
<name>
            </name>
<styleUrl>#icon</styleUrl>
<Point>
<coordinates>
-6.1667,31.5667
</coordinates>
</Point>
</Placemark>
<Placemark>
<name>
            </name>
<styleUrl>#icon</styleUrl>
<Point>
<coordinates>
-6.1667,31.0111
</coordinates>
</Point>
</Placemark>
<Placemark>
<name>
B (local)    T (local)        </name>
<styleUrl>#icon</styleUrl>
<Point>
<coordinates>
-6.1667,30.4556
</coordinates>
</Point>
</Placemark>
<Placemark>
<name>
B (local)    T (local)        S (local)</name>
<styleUrl>#icon</styleUrl>
<Point>
<coordinates>
-6.1667,29.9
</coordinates>
</Point>
</Placemark>
<Placemark>
<name>
            </name>
<styleUrl>#icon</styleUrl>
<Point>
<coordinates>
-6.1667,29.3444
</coordinates>
</Point>
</Placemark>
<Placemark>
<name>
    T (local)        S (local)</name>
<styleUrl>#icon</styleUrl>
<Point>
<coordinates>
-6.1667,28.7889
</coordinates>
</Point>
</Placemark>
<Placemark>
<name>
    T (sparse)        S (local)</name>
<styleUrl>#icon</styleUrl>
<Point>
<coordinates>
-6.1667,28.2333
</coordinates>
</Point>
</Placemark>
<Placemark>
<name>
    T (sparse)        </name>
<styleUrl>#icon</styleUrl>
<Point>
<coordinates>
-6.1667,27.6778
</coordinates>
</Point>
</Placemark>
<Placemark>
<name>
    T (sparse)        S (local)</name>
<styleUrl>#icon</styleUrl>
<Point>
<coordinates>
-6.1667,27.1222
</coordinates>
</Point>
</Placemark>
<Placemark>
<name>
    T (partial)        S (sparse)</name>
<styleUrl>#icon</styleUrl>
<Point>
<coordinates>
-6.1667,26.5667
</coordinates>
</Point>
</Placemark>
<Placemark>
<name>
    T (sparse)        S (sparse)</name>
<styleUrl>#icon</styleUrl>
<Point>
<coordinates>
-6.1667,26.0111
</coordinates>
</Point>
</Placemark>
<Placemark>
<name>
    T (local)        </name>
<styleUrl>#icon</styleUrl>
<Point>
<coordinates>
-6.1667,25.4556
</coordinates>
</Point>
</Placemark>
<Placemark>
<name>
            </name>
<styleUrl>#icon</styleUrl>
<Point>
<coordinates>
-6.1667,24.9
</coordinates>
</Point>
</Placemark>
<Placemark>
<name>
    T (local)    L (local)    </name>
<styleUrl>#icon</styleUrl>
<Point>
<coordinates>
-6.1667,24.3444
</coordinates>
</Point>
</Placemark>
<Placemark>
<name>
    T (partial)    L (sparse)    S (sparse)</name>
<styleUrl>#icon</styleUrl>
<Point>
<coordinates>
-6.1667,23.7889
</coordinates>
</Point>
</Placemark>
<Placemark>
<name>
B (sparse)    T (partial)    L (sparse)    </name>
<styleUrl>#icon</styleUrl>
<Point>
<coordinates>
-6.1667,23.2333
</coordinates>
</Point>
</Placemark>
<Placemark>
<name>
B (local)    T (sparse)    L (sparse)    </name>
<styleUrl>#icon</styleUrl>
<Point>
<coordinates>
-6.1667,22.6778
</coordinates>
</Point>
</Placemark>
<Placemark>
<name>
B (sparse)    T (sparse)    L (partial)    </name>
<styleUrl>#icon</styleUrl>
<Point>
<coordinates>
-6.1667,22.1222
</coordinates>
</Point>
</Placemark>
<Placemark>
<name>
B (partial)    T (partial)    L (partial)    </name>
<styleUrl>#icon</styleUrl>
<Point>
<coordinates>
-6.1667,21.5667
</coordinates>
</Point>
</Placemark>
<Placemark>
<name>
    T (sparse)    L (sparse)    </name>
<styleUrl>#icon</styleUrl>
<Point>
<coordinates>
-6.1667,21.0111
</coordinates>
</Point>
</Placemark>
<Placemark>
<name>
        L (sparse)    </name>
<styleUrl>#icon</styleUrl>
<Point>
<coordinates>
-6.1667,20.4556
</coordinates>
</Point>
</Placemark>
<Placemark>
<name>
        L (local)    </name>
<styleUrl>#icon</styleUrl>
<Point>
<coordinates>
-6.1667,19.9
</coordinates>
</Point>
</Placemark>
<Placemark>
<name>
            </name>
<styleUrl>#icon</styleUrl>
<Point>
<coordinates>
-6.1667,19.3444
</coordinates>
</Point>
</Placemark>
<Placemark>
<name>
    T (sparse)        </name>
<styleUrl>#icon</styleUrl>
<Point>
<coordinates>
-6.1667,18.7889
</coordinates>
</Point>
</Placemark>
<Placemark>
<name>
    T (full)        </name>
<styleUrl>#icon</styleUrl>
<Point>
<coordinates>
-6.1667,18.2333
</coordinates>
</Point>
</Placemark>
<Placemark>
<name>
    T (partial)        </name>
<styleUrl>#icon</styleUrl>
<Point>
<coordinates>
-6.1667,17.6778
</coordinates>
</Point>
</Placemark>
<Placemark>
<name>
    T (sparse)        </name>
<styleUrl>#icon</styleUrl>
<Point>
<coordinates>
-6.1667,17.1222
</coordinates>
</Point>
</Placemark>
<Placemark>
<name>
            </name>
<styleUrl>#icon</styleUrl>
<Point>
<coordinates>
-6.1667,16.5667
</coordinates>
</Point>
</Placemark>
<Placemark>
<name>
            </name>
<styleUrl>#icon</styleUrl>
<Point>
<coordinates>
-6.1667,16.0111
</coordinates>
</Point>
</Placemark>
<Placemark>
<name>
            </name>
<styleUrl>#icon</styleUrl>
<Point>
<coordinates>
-6.1667,15.4556
</coordinates>
</Point>
</Placemark>
<Placemark>
<name>
            </name>
<styleUrl>#icon</styleUrl>
<Point>
<coordinates>
-6.1667,14.9
</coordinates>
</Point>
</Placemark>
<Placemark>
<name>
            </name>
<styleUrl>#icon</styleUrl>
<Point>
<coordinates>
-6.1667,14.3444
</coordinates>
</Point>
</Placemark>
<Placemark>
<name>
            </name>
<styleUrl>#icon</styleUrl>
<Point>
<coordinates>
-6.1667,13.7889
</coordinates>
</Point>
</Placemark>
<Placemark>
<name>
            </name>
<styleUrl>#icon</styleUrl>
<Point>
<coordinates>
-6.1667,13.2333
</coordinates>
</Point>
</Placemark>
<Placemark>
<name>
            </name>
<styleUrl>#icon</styleUrl>
<Point>
<coordinates>
-5.3333,42.6778
</coordinates>
</Point>
</Placemark>
<Placemark>
<name>
            </name>
<styleUrl>#icon</styleUrl>
<Point>
<coordinates>
-5.3333,42.1222
</coordinates>
</Point>
</Placemark>
<Placemark>
<name>
            </name>
<styleUrl>#icon</styleUrl>
<Point>
<coordinates>
-5.3333,41.5667
</coordinates>
</Point>
</Placemark>
<Placemark>
<name>
            </name>
<styleUrl>#icon</styleUrl>
<Point>
<coordinates>
-5.3333,41.0111
</coordinates>
</Point>
</Placemark>
<Placemark>
<name>
            </name>
<styleUrl>#icon</styleUrl>
<Point>
<coordinates>
-5.3333,40.4556
</coordinates>
</Point>
</Placemark>
<Placemark>
<name>
            </name>
<styleUrl>#icon</styleUrl>
<Point>
<coordinates>
-5.3333,39.9
</coordinates>
</Point>
</Placemark>
<Placemark>
<name>
            </name>
<styleUrl>#icon</styleUrl>
<Point>
<coordinates>
-5.3333,39.3444
</coordinates>
</Point>
</Placemark>
<Placemark>
<name>
            </name>
<styleUrl>#icon</styleUrl>
<Point>
<coordinates>
-5.3333,38.7889
</coordinates>
</Point>
</Placemark>
<Placemark>
<name>
            </name>
<styleUrl>#icon</styleUrl>
<Point>
<coordinates>
-5.3333,32.6778
</coordinates>
</Point>
</Placemark>
<Placemark>
<name>
            </name>
<styleUrl>#icon</styleUrl>
<Point>
<coordinates>
-5.3333,32.1222
</coordinates>
</Point>
</Placemark>
<Placemark>
<name>
            </name>
<styleUrl>#icon</styleUrl>
<Point>
<coordinates>
-5.3333,31.5667
</coordinates>
</Point>
</Placemark>
<Placemark>
<name>
            </name>
<styleUrl>#icon</styleUrl>
<Point>
<coordinates>
-5.3333,31.0111
</coordinates>
</Point>
</Placemark>
<Placemark>
<name>
B (local)    T (local)        </name>
<styleUrl>#icon</styleUrl>
<Point>
<coordinates>
-5.3333,30.4556
</coordinates>
</Point>
</Placemark>
<Placemark>
<name>
B (local)    T (local)        </name>
<styleUrl>#icon</styleUrl>
<Point>
<coordinates>
-5.3333,29.9
</coordinates>
</Point>
</Placemark>
<Placemark>
<name>
            </name>
<styleUrl>#icon</styleUrl>
<Point>
<coordinates>
-5.3333,29.3444
</coordinates>
</Point>
</Placemark>
<Placemark>
<name>
    T (local)        S (local)</name>
<styleUrl>#icon</styleUrl>
<Point>
<coordinates>
-5.3333,28.7889
</coordinates>
</Point>
</Placemark>
<Placemark>
<name>
    T (partial)        S (partial)</name>
<styleUrl>#icon</styleUrl>
<Point>
<coordinates>
-5.3333,28.2333
</coordinates>
</Point>
</Placemark>
<Placemark>
<name>
    T (partial)        S (partial)</name>
<styleUrl>#icon</styleUrl>
<Point>
<coordinates>
-5.3333,27.6778
</coordinates>
</Point>
</Placemark>
<Placemark>
<name>
B (local)    T (sparse)        S (sparse)</name>
<styleUrl>#icon</styleUrl>
<Point>
<coordinates>
-5.3333,27.1222
</coordinates>
</Point>
</Placemark>
<Placemark>
<name>
            </name>
<styleUrl>#icon</styleUrl>
<Point>
<coordinates>
-5.3333,26.5667
</coordinates>
</Point>
</Placemark>
<Placemark>
<name>
            </name>
<styleUrl>#icon</styleUrl>
<Point>
<coordinates>
-5.3333,26.0111
</coordinates>
</Point>
</Placemark>
<Placemark>
<name>
            </name>
<styleUrl>#icon</styleUrl>
<Point>
<coordinates>
-5.3333,25.4556
</coordinates>
</Point>
</Placemark>
<Placemark>
<name>
    T (sparse)        S (sparse)</name>
<styleUrl>#icon</styleUrl>
<Point>
<coordinates>
-5.3333,24.9
</coordinates>
</Point>
</Placemark>
<Placemark>
<name>
    T (partial)    L (partial)    S (sparse)</name>
<styleUrl>#icon</styleUrl>
<Point>
<coordinates>
-5.3333,24.3444
</coordinates>
</Point>
</Placemark>
<Placemark>
<name>
    T (partial)    L (partial)    </name>
<styleUrl>#icon</styleUrl>
<Point>
<coordinates>
-5.3333,23.7889
</coordinates>
</Point>
</Placemark>
<Placemark>
<name>
B (local)    T (sparse)    L (sparse)    </name>
<styleUrl>#icon</styleUrl>
<Point>
<coordinates>
-5.3333,23.2333
</coordinates>
</Point>
</Placemark>
<Placemark>
<name>
B (local)    T (sparse)    L (partial)    </name>
<styleUrl>#icon</styleUrl>
<Point>
<coordinates>
-5.3333,22.6778
</coordinates>
</Point>
</Placemark>
<Placemark>
<name>
    T (local)    L (sparse)    </name>
<styleUrl>#icon</styleUrl>
<Point>
<coordinates>
-5.3333,22.1222
</coordinates>
</Point>
</Placemark>
<Placemark>
<name>
    T (sparse)    L (sparse)    </name>
<styleUrl>#icon</styleUrl>
<Point>
<coordinates>
-5.3333,21.5667
</coordinates>
</Point>
</Placemark>
<Placemark>
<name>
    T (partial)    L (partial)    </name>
<styleUrl>#icon</styleUrl>
<Point>
<coordinates>
-5.3333,21.0111
</coordinates>
</Point>
</Placemark>
<Placemark>
<name>
    T (sparse)    L (sparse)    </name>
<styleUrl>#icon</styleUrl>
<Point>
<coordinates>
-5.3333,20.4556
</coordinates>
</Point>
</Placemark>
<Placemark>
<name>
    T (local)    L (sparse)    </name>
<styleUrl>#icon</styleUrl>
<Point>
<coordinates>
-5.3333,19.9
</coordinates>
</Point>
</Placemark>
<Placemark>
<name>
        L (sparse)    </name>
<styleUrl>#icon</styleUrl>
<Point>
<coordinates>
-5.3333,19.3444
</coordinates>
</Point>
</Placemark>
<Placemark>
<name>
    T (sparse)    L (sparse)    </name>
<styleUrl>#icon</styleUrl>
<Point>
<coordinates>
-5.3333,18.7889
</coordinates>
</Point>
</Placemark>
<Placemark>
<name>
    T (full)    L (local)    </name>
<styleUrl>#icon</styleUrl>
<Point>
<coordinates>
-5.3333,18.2333
</coordinates>
</Point>
</Placemark>
<Placemark>
<name>
    T (full)        </name>
<styleUrl>#icon</styleUrl>
<Point>
<coordinates>
-5.3333,17.6778
</coordinates>
</Point>
</Placemark>
<Placemark>
<name>
    T (partial)        </name>
<styleUrl>#icon</styleUrl>
<Point>
<coordinates>
-5.3333,17.1222
</coordinates>
</Point>
</Placemark>
<Placemark>
<name>
            </name>
<styleUrl>#icon</styleUrl>
<Point>
<coordinates>
-5.3333,16.5667
</coordinates>
</Point>
</Placemark>
<Placemark>
<name>
            </name>
<styleUrl>#icon</styleUrl>
<Point>
<coordinates>
-5.3333,16.0111
</coordinates>
</Point>
</Placemark>
<Placemark>
<name>
            </name>
<styleUrl>#icon</styleUrl>
<Point>
<coordinates>
-5.3333,15.4556
</coordinates>
</Point>
</Placemark>
<Placemark>
<name>
            </name>
<styleUrl>#icon</styleUrl>
<Point>
<coordinates>
-5.3333,14.9
</coordinates>
</Point>
</Placemark>
<Placemark>
<name>
            </name>
<styleUrl>#icon</styleUrl>
<Point>
<coordinates>
-5.3333,14.3444
</coordinates>
</Point>
</Placemark>
<Placemark>
<name>
            </name>
<styleUrl>#icon</styleUrl>
<Point>
<coordinates>
-5.3333,13.7889
</coordinates>
</Point>
</Placemark>
<Placemark>
<name>
            </name>
<styleUrl>#icon</styleUrl>
<Point>
<coordinates>
-5.3333,13.2333
</coordinates>
</Point>
</Placemark>
<Placemark>
<name>
            </name>
<styleUrl>#icon</styleUrl>
<Point>
<coordinates>
-4.5,42.6778
</coordinates>
</Point>
</Placemark>
<Placemark>
<name>
            </name>
<styleUrl>#icon</styleUrl>
<Point>
<coordinates>
-4.5,42.1222
</coordinates>
</Point>
</Placemark>
<Placemark>
<name>
            </name>
<styleUrl>#icon</styleUrl>
<Point>
<coordinates>
-4.5,41.5667
</coordinates>
</Point>
</Placemark>
<Placemark>
<name>
            </name>
<styleUrl>#icon</styleUrl>
<Point>
<coordinates>
-4.5,41.0111
</coordinates>
</Point>
</Placemark>
<Placemark>
<name>
            </name>
<styleUrl>#icon</styleUrl>
<Point>
<coordinates>
-4.5,40.4556
</coordinates>
</Point>
</Placemark>
<Placemark>
<name>
            </name>
<styleUrl>#icon</styleUrl>
<Point>
<coordinates>
-4.5,39.9
</coordinates>
</Point>
</Placemark>
<Placemark>
<name>
            </name>
<styleUrl>#icon</styleUrl>
<Point>
<coordinates>
-4.5,39.3444
</coordinates>
</Point>
</Placemark>
<Placemark>
<name>
            </name>
<styleUrl>#icon</styleUrl>
<Point>
<coordinates>
-4.5,38.7889
</coordinates>
</Point>
</Placemark>
<Placemark>
<name>
            </name>
<styleUrl>#icon</styleUrl>
<Point>
<coordinates>
-4.5,33.7889
</coordinates>
</Point>
</Placemark>
<Placemark>
<name>
            </name>
<styleUrl>#icon</styleUrl>
<Point>
<coordinates>
-4.5,33.2333
</coordinates>
</Point>
</Placemark>
<Placemark>
<name>
            </name>
<styleUrl>#icon</styleUrl>
<Point>
<coordinates>
-4.5,32.6778
</coordinates>
</Point>
</Placemark>
<Placemark>
<name>
            </name>
<styleUrl>#icon</styleUrl>
<Point>
<coordinates>
-4.5,32.1222
</coordinates>
</Point>
</Placemark>
<Placemark>
<name>
    T (sparse)        </name>
<styleUrl>#icon</styleUrl>
<Point>
<coordinates>
-4.5,31.5667
</coordinates>
</Point>
</Placemark>
<Placemark>
<name>
    T (sparse)        S (local)</name>
<styleUrl>#icon</styleUrl>
<Point>
<coordinates>
-4.5,31.0111
</coordinates>
</Point>
</Placemark>
<Placemark>
<name>
    T (sparse)        S (local)</name>
<styleUrl>#icon</styleUrl>
<Point>
<coordinates>
-4.5,30.4556
</coordinates>
</Point>
</Placemark>
<Placemark>
<name>
    T (sparse)        S (local)</name>
<styleUrl>#icon</styleUrl>
<Point>
<coordinates>
-4.5,29.9
</coordinates>
</Point>
</Placemark>
<Placemark>
<name>
    T (sparse)        S (sparse)</name>
<styleUrl>#icon</styleUrl>
<Point>
<coordinates>
-4.5,29.3444
</coordinates>
</Point>
</Placemark>
<Placemark>
<name>
    T (sparse)        S (sparse)</name>
<styleUrl>#icon</styleUrl>
<Point>
<coordinates>
-4.5,28.7889
</coordinates>
</Point>
</Placemark>
<Placemark>
<name>
    T (partial)        S (partial)</name>
<styleUrl>#icon</styleUrl>
<Point>
<coordinates>
-4.5,28.2333
</coordinates>
</Point>
</Placemark>
<Placemark>
<name>
    T (partial)        S (partial)</name>
<styleUrl>#icon</styleUrl>
<Point>
<coordinates>
-4.5,27.6778
</coordinates>
</Point>
</Placemark>
<Placemark>
<name>
    T (local)        S (local)</name>
<styleUrl>#icon</styleUrl>
<Point>
<coordinates>
-4.5,27.1222
</coordinates>
</Point>
</Placemark>
<Placemark>
<name>
            </name>
<styleUrl>#icon</styleUrl>
<Point>
<coordinates>
-4.5,26.5667
</coordinates>
</Point>
</Placemark>
<Placemark>
<name>
            </name>
<styleUrl>#icon</styleUrl>
<Point>
<coordinates>
-4.5,26.0111
</coordinates>
</Point>
</Placemark>
<Placemark>
<name>
            </name>
<styleUrl>#icon</styleUrl>
<Point>
<coordinates>
-4.5,25.4556
</coordinates>
</Point>
</Placemark>
<Placemark>
<name>
    T (sparse)    L (sparse)    </name>
<styleUrl>#icon</styleUrl>
<Point>
<coordinates>
-4.5,24.9
</coordinates>
</Point>
</Placemark>
<Placemark>
<name>
    T (full)    L (full)    </name>
<styleUrl>#icon</styleUrl>
<Point>
<coordinates>
-4.5,24.3444
</coordinates>
</Point>
</Placemark>
<Placemark>
<name>
B (sparse)    T (sparse)    L (sparse)    </name>
<styleUrl>#icon</styleUrl>
<Point>
<coordinates>
-4.5,23.7889
</coordinates>
</Point>
</Placemark>
<Placemark>
<name>
B (sparse)    T (sparse)    L (sparse)    </name>
<styleUrl>#icon</styleUrl>
<Point>
<coordinates>
-4.5,23.2333
</coordinates>
</Point>
</Placemark>
<Placemark>
<name>
        L (full)    </name>
<styleUrl>#icon</styleUrl>
<Point>
<coordinates>
-4.5,22.6778
</coordinates>
</Point>
</Placemark>
<Placemark>
<name>
        L (partial)    </name>
<styleUrl>#icon</styleUrl>
<Point>
<coordinates>
-4.5,22.1222
</coordinates>
</Point>
</Placemark>
<Placemark>
<name>
B (local)    T (local)        </name>
<styleUrl>#icon</styleUrl>
<Point>
<coordinates>
-4.5,21.5667
</coordinates>
</Point>
</Placemark>
<Placemark>
<name>
B (sparse)    T (sparse)        </name>
<styleUrl>#icon</styleUrl>
<Point>
<coordinates>
-4.5,21.0111
</coordinates>
</Point>
</Placemark>
<Placemark>
<name>
B (sparse)    T (partial)    L (partial)    </name>
<styleUrl>#icon</styleUrl>
<Point>
<coordinates>
-4.5,20.4556
</coordinates>
</Point>
</Placemark>
<Placemark>
<name>
    T (partial)    L (full)    </name>
<styleUrl>#icon</styleUrl>
<Point>
<coordinates>
-4.5,19.9
</coordinates>
</Point>
</Placemark>
<Placemark>
<name>
        L (full)    </name>
<styleUrl>#icon</styleUrl>
<Point>
<coordinates>
-4.5,19.3444
</coordinates>
</Point>
</Placemark>
<Placemark>
<name>
    T (sparse)    L (partial)    </name>
<styleUrl>#icon</styleUrl>
<Point>
<coordinates>
-4.5,18.7889
</coordinates>
</Point>
</Placemark>
<Placemark>
<name>
    T (full)        </name>
<styleUrl>#icon</styleUrl>
<Point>
<coordinates>
-4.5,18.2333
</coordinates>
</Point>
</Placemark>
<Placemark>
<name>
    T (full)        </name>
<styleUrl>#icon</styleUrl>
<Point>
<coordinates>
-4.5,17.6778
</coordinates>
</Point>
</Placemark>
<Placemark>
<name>
    T (sparse)        </name>
<styleUrl>#icon</styleUrl>
<Point>
<coordinates>
-4.5,17.1222
</coordinates>
</Point>
</Placemark>
<Placemark>
<name>
            </name>
<styleUrl>#icon</styleUrl>
<Point>
<coordinates>
-4.5,16.5667
</coordinates>
</Point>
</Placemark>
<Placemark>
<name>
            </name>
<styleUrl>#icon</styleUrl>
<Point>
<coordinates>
-4.5,16.0111
</coordinates>
</Point>
</Placemark>
<Placemark>
<name>
            </name>
<styleUrl>#icon</styleUrl>
<Point>
<coordinates>
-4.5,15.4556
</coordinates>
</Point>
</Placemark>
<Placemark>
<name>
            </name>
<styleUrl>#icon</styleUrl>
<Point>
<coordinates>
-4.5,14.9
</coordinates>
</Point>
</Placemark>
<Placemark>
<name>
            </name>
<styleUrl>#icon</styleUrl>
<Point>
<coordinates>
-4.5,14.3444
</coordinates>
</Point>
</Placemark>
<Placemark>
<name>
            </name>
<styleUrl>#icon</styleUrl>
<Point>
<coordinates>
-4.5,13.7889
</coordinates>
</Point>
</Placemark>
<Placemark>
<name>
            </name>
<styleUrl>#icon</styleUrl>
<Point>
<coordinates>
-4.5,13.2333
</coordinates>
</Point>
</Placemark>
<Placemark>
<name>
            </name>
<styleUrl>#icon</styleUrl>
<Point>
<coordinates>
-3.6667,42.1222
</coordinates>
</Point>
</Placemark>
<Placemark>
<name>
            </name>
<styleUrl>#icon</styleUrl>
<Point>
<coordinates>
-3.6667,41.0111
</coordinates>
</Point>
</Placemark>
<Placemark>
<name>
            </name>
<styleUrl>#icon</styleUrl>
<Point>
<coordinates>
-3.6667,40.4556
</coordinates>
</Point>
</Placemark>
<Placemark>
<name>
            </name>
<styleUrl>#icon</styleUrl>
<Point>
<coordinates>
-3.6667,39.9
</coordinates>
</Point>
</Placemark>
<Placemark>
<name>
            </name>
<styleUrl>#icon</styleUrl>
<Point>
<coordinates>
-3.6667,39.3444
</coordinates>
</Point>
</Placemark>
<Placemark>
<name>
            </name>
<styleUrl>#icon</styleUrl>
<Point>
<coordinates>
-3.6667,38.7889
</coordinates>
</Point>
</Placemark>
<Placemark>
<name>
            </name>
<styleUrl>#icon</styleUrl>
<Point>
<coordinates>
-3.6667,38.2333
</coordinates>
</Point>
</Placemark>
<Placemark>
<name>
            </name>
<styleUrl>#icon</styleUrl>
<Point>
<coordinates>
-3.6667,34.9
</coordinates>
</Point>
</Placemark>
<Placemark>
<name>
            </name>
<styleUrl>#icon</styleUrl>
<Point>
<coordinates>
-3.6667,34.3444
</coordinates>
</Point>
</Placemark>
<Placemark>
<name>
            </name>
<styleUrl>#icon</styleUrl>
<Point>
<coordinates>
-3.6667,33.7889
</coordinates>
</Point>
</Placemark>
<Placemark>
<name>
            </name>
<styleUrl>#icon</styleUrl>
<Point>
<coordinates>
-3.6667,33.2333
</coordinates>
</Point>
</Placemark>
<Placemark>
<name>
            </name>
<styleUrl>#icon</styleUrl>
<Point>
<coordinates>
-3.6667,32.6778
</coordinates>
</Point>
</Placemark>
<Placemark>
<name>
    T (local)        </name>
<styleUrl>#icon</styleUrl>
<Point>
<coordinates>
-3.6667,32.1222
</coordinates>
</Point>
</Placemark>
<Placemark>
<name>
    T (sparse)        S (sparse)</name>
<styleUrl>#icon</styleUrl>
<Point>
<coordinates>
-3.6667,31.5667
</coordinates>
</Point>
</Placemark>
<Placemark>
<name>
B (local)    T (sparse)        S (local)</name>
<styleUrl>#icon</styleUrl>
<Point>
<coordinates>
-3.6667,31.0111
</coordinates>
</Point>
</Placemark>
<Placemark>
<name>
    T (sparse)        S (sparse)</name>
<styleUrl>#icon</styleUrl>
<Point>
<coordinates>
-3.6667,30.4556
</coordinates>
</Point>
</Placemark>
<Placemark>
<name>
    T (sparse)        S (sparse)</name>
<styleUrl>#icon</styleUrl>
<Point>
<coordinates>
-3.6667,29.9
</coordinates>
</Point>
</Placemark>
<Placemark>
<name>
    T (sparse)        S (sparse)</name>
<styleUrl>#icon</styleUrl>
<Point>
<coordinates>
-3.6667,29.3444
</coordinates>
</Point>
</Placemark>
<Placemark>
<name>
    T (full)        S (full)</name>
<styleUrl>#icon</styleUrl>
<Point>
<coordinates>
-3.6667,28.7889
</coordinates>
</Point>
</Placemark>
<Placemark>
<name>
    T (full)        S (full)</name>
<styleUrl>#icon</styleUrl>
<Point>
<coordinates>
-3.6667,28.2333
</coordinates>
</Point>
</Placemark>
<Placemark>
<name>
    T (partial)        S (partial)</name>
<styleUrl>#icon</styleUrl>
<Point>
<coordinates>
-3.6667,27.6778
</coordinates>
</Point>
</Placemark>
<Placemark>
<name>
            </name>
<styleUrl>#icon</styleUrl>
<Point>
<coordinates>
-3.6667,27.1222
</coordinates>
</Point>
</Placemark>
<Placemark>
<name>
            </name>
<styleUrl>#icon</styleUrl>
<Point>
<coordinates>
-3.6667,26.5667
</coordinates>
</Point>
</Placemark>
<Placemark>
<name>
            </name>
<styleUrl>#icon</styleUrl>
<Point>
<coordinates>
-3.6667,26.0111
</coordinates>
</Point>
</Placemark>
<Placemark>
<name>
    T (sparse)        </name>
<styleUrl>#icon</styleUrl>
<Point>
<coordinates>
-3.6667,25.4556
</coordinates>
</Point>
</Placemark>
<Placemark>
<name>
    T (partial)        S (local)</name>
<styleUrl>#icon</styleUrl>
<Point>
<coordinates>
-3.6667,24.9
</coordinates>
</Point>
</Placemark>
<Placemark>
<name>
    T (partial)    L (sparse)    </name>
<styleUrl>#icon</styleUrl>
<Point>
<coordinates>
-3.6667,24.3444
</coordinates>
</Point>
</Placemark>
<Placemark>
<name>
B (sparse)    T (sparse)    L (partial)    </name>
<styleUrl>#icon</styleUrl>
<Point>
<coordinates>
-3.6667,23.7889
</coordinates>
</Point>
</Placemark>
<Placemark>
<name>
B (sparse)    T (sparse)    L (sparse)    </name>
<styleUrl>#icon</styleUrl>
<Point>
<coordinates>
-3.6667,23.2333
</coordinates>
</Point>
</Placemark>
<Placemark>
<name>
B (local)    T (partial)    L (partial)    </name>
<styleUrl>#icon</styleUrl>
<Point>
<coordinates>
-3.6667,22.6778
</coordinates>
</Point>
</Placemark>
<Placemark>
<name>
B (sparse)    T (sparse)    L (sparse)    </name>
<styleUrl>#icon</styleUrl>
<Point>
<coordinates>
-3.6667,22.1222
</coordinates>
</Point>
</Placemark>
<Placemark>
<name>
    T (sparse)    L (sparse)    </name>
<styleUrl>#icon</styleUrl>
<Point>
<coordinates>
-3.6667,21.5667
</coordinates>
</Point>
</Placemark>
<Placemark>
<name>
B (sparse)    T (partial)    L (partial)    </name>
<styleUrl>#icon</styleUrl>
<Point>
<coordinates>
-3.6667,21.0111
</coordinates>
</Point>
</Placemark>
<Placemark>
<name>
B (sparse)    T (sparse)    L (sparse)    </name>
<styleUrl>#icon</styleUrl>
<Point>
<coordinates>
-3.6667,20.4556
</coordinates>
</Point>
</Placemark>
<Placemark>
<name>
B (sparse)    T (sparse)    L (sparse)    </name>
<styleUrl>#icon</styleUrl>
<Point>
<coordinates>
-3.6667,19.9
</coordinates>
</Point>
</Placemark>
<Placemark>
<name>
        L (sparse)    </name>
<styleUrl>#icon</styleUrl>
<Point>
<coordinates>
-3.6667,19.3444
</coordinates>
</Point>
</Placemark>
<Placemark>
<name>
        L (partial)    </name>
<styleUrl>#icon</styleUrl>
<Point>
<coordinates>
-3.6667,18.7889
</coordinates>
</Point>
</Placemark>
<Placemark>
<name>
    T (partial)        </name>
<styleUrl>#icon</styleUrl>
<Point>
<coordinates>
-3.6667,18.2333
</coordinates>
</Point>
</Placemark>
<Placemark>
<name>
    T (partial)        </name>
<styleUrl>#icon</styleUrl>
<Point>
<coordinates>
-3.6667,17.6778
</coordinates>
</Point>
</Placemark>
<Placemark>
<name>
            </name>
<styleUrl>#icon</styleUrl>
<Point>
<coordinates>
-3.6667,17.1222
</coordinates>
</Point>
</Placemark>
<Placemark>
<name>
            </name>
<styleUrl>#icon</styleUrl>
<Point>
<coordinates>
-3.6667,16.5667
</coordinates>
</Point>
</Placemark>
<Placemark>
<name>
            </name>
<styleUrl>#icon</styleUrl>
<Point>
<coordinates>
-3.6667,16.0111
</coordinates>
</Point>
</Placemark>
<Placemark>
<name>
            </name>
<styleUrl>#icon</styleUrl>
<Point>
<coordinates>
-3.6667,15.4556
</coordinates>
</Point>
</Placemark>
<Placemark>
<name>
            </name>
<styleUrl>#icon</styleUrl>
<Point>
<coordinates>
-3.6667,14.9
</coordinates>
</Point>
</Placemark>
<Placemark>
<name>
            </name>
<styleUrl>#icon</styleUrl>
<Point>
<coordinates>
-3.6667,14.3444
</coordinates>
</Point>
</Placemark>
<Placemark>
<name>
            </name>
<styleUrl>#icon</styleUrl>
<Point>
<coordinates>
-3.6667,13.7889
</coordinates>
</Point>
</Placemark>
<Placemark>
<name>
            </name>
<styleUrl>#icon</styleUrl>
<Point>
<coordinates>
-3.6667,13.2333
</coordinates>
</Point>
</Placemark>
<Placemark>
<name>
            </name>
<styleUrl>#icon</styleUrl>
<Point>
<coordinates>
-2.8333,41.5667
</coordinates>
</Point>
</Placemark>
<Placemark>
<name>
            </name>
<styleUrl>#icon</styleUrl>
<Point>
<coordinates>
-2.8333,41.0111
</coordinates>
</Point>
</Placemark>
<Placemark>
<name>
            </name>
<styleUrl>#icon</styleUrl>
<Point>
<coordinates>
-2.8333,40.4556
</coordinates>
</Point>
</Placemark>
<Placemark>
<name>
            </name>
<styleUrl>#icon</styleUrl>
<Point>
<coordinates>
-2.8333,39.9
</coordinates>
</Point>
</Placemark>
<Placemark>
<name>
            </name>
<styleUrl>#icon</styleUrl>
<Point>
<coordinates>
-2.8333,39.3444
</coordinates>
</Point>
</Placemark>
<Placemark>
<name>
            </name>
<styleUrl>#icon</styleUrl>
<Point>
<coordinates>
-2.8333,38.7889
</coordinates>
</Point>
</Placemark>
<Placemark>
<name>
            </name>
<styleUrl>#icon</styleUrl>
<Point>
<coordinates>
-2.8333,38.2333
</coordinates>
</Point>
</Placemark>
<Placemark>
<name>
            </name>
<styleUrl>#icon</styleUrl>
<Point>
<coordinates>
-2.8333,37.6778
</coordinates>
</Point>
</Placemark>
<Placemark>
<name>
            </name>
<styleUrl>#icon</styleUrl>
<Point>
<coordinates>
-2.8333,37.1222
</coordinates>
</Point>
</Placemark>
<Placemark>
<name>
            </name>
<styleUrl>#icon</styleUrl>
<Point>
<coordinates>
-2.8333,34.9
</coordinates>
</Point>
</Placemark>
<Placemark>
<name>
            </name>
<styleUrl>#icon</styleUrl>
<Point>
<coordinates>
-2.8333,34.3444
</coordinates>
</Point>
</Placemark>
<Placemark>
<name>
            </name>
<styleUrl>#icon</styleUrl>
<Point>
<coordinates>
-2.8333,33.7889
</coordinates>
</Point>
</Placemark>
<Placemark>
<name>
            </name>
<styleUrl>#icon</styleUrl>
<Point>
<coordinates>
-2.8333,33.2333
</coordinates>
</Point>
</Placemark>
<Placemark>
<name>
            </name>
<styleUrl>#icon</styleUrl>
<Point>
<coordinates>
-2.8333,32.6778
</coordinates>
</Point>
</Placemark>
<Placemark>
<name>
    T (sparse)        </name>
<styleUrl>#icon</styleUrl>
<Point>
<coordinates>
-2.8333,32.1222
</coordinates>
</Point>
</Placemark>
<Placemark>
<name>
    T (local)        </name>
<styleUrl>#icon</styleUrl>
<Point>
<coordinates>
-2.8333,31.5667
</coordinates>
</Point>
</Placemark>
<Placemark>
<name>
    T (local)        </name>
<styleUrl>#icon</styleUrl>
<Point>
<coordinates>
-2.8333,31.0111
</coordinates>
</Point>
</Placemark>
<Placemark>
<name>
    T (sparse)        S (sparse)</name>
<styleUrl>#icon</styleUrl>
<Point>
<coordinates>
-2.8333,30.4556
</coordinates>
</Point>
</Placemark>
<Placemark>
<name>
    T (sparse)        S (sparse)</name>
<styleUrl>#icon</styleUrl>
<Point>
<coordinates>
-2.8333,29.9
</coordinates>
</Point>
</Placemark>
<Placemark>
<name>
    T (partial)        S (partial)</name>
<styleUrl>#icon</styleUrl>
<Point>
<coordinates>
-2.8333,29.3444
</coordinates>
</Point>
</Placemark>
<Placemark>
<name>
    T (partial)        S (partial)</name>
<styleUrl>#icon</styleUrl>
<Point>
<coordinates>
-2.8333,28.7889
</coordinates>
</Point>
</Placemark>
<Placemark>
<name>
    T (full)        S (full)</name>
<styleUrl>#icon</styleUrl>
<Point>
<coordinates>
-2.8333,28.2333
</coordinates>
</Point>
</Placemark>
<Placemark>
<name>
    T (full)        S (full)</name>
<styleUrl>#icon</styleUrl>
<Point>
<coordinates>
-2.8333,27.6778
</coordinates>
</Point>
</Placemark>
<Placemark>
<name>
    T (partial)        S (partial)</name>
<styleUrl>#icon</styleUrl>
<Point>
<coordinates>
-2.8333,27.1222
</coordinates>
</Point>
</Placemark>
<Placemark>
<name>
    T (sparse)        S (local)</name>
<styleUrl>#icon</styleUrl>
<Point>
<coordinates>
-2.8333,26.5667
</coordinates>
</Point>
</Placemark>
<Placemark>
<name>
    T (sparse)        S (local)</name>
<styleUrl>#icon</styleUrl>
<Point>
<coordinates>
-2.8333,26.0111
</coordinates>
</Point>
</Placemark>
<Placemark>
<name>
B (local)    T (sparse)    L (local)    </name>
<styleUrl>#icon</styleUrl>
<Point>
<coordinates>
-2.8333,25.4556
</coordinates>
</Point>
</Placemark>
<Placemark>
<name>
B (local)    T (partial)    L (sparse)    </name>
<styleUrl>#icon</styleUrl>
<Point>
<coordinates>
-2.8333,24.9
</coordinates>
</Point>
</Placemark>
<Placemark>
<name>
B (local)    T (sparse)    L (partial)    </name>
<styleUrl>#icon</styleUrl>
<Point>
<coordinates>
-2.8333,24.3444
</coordinates>
</Point>
</Placemark>
<Placemark>
<name>
        L (partial)    </name>
<styleUrl>#icon</styleUrl>
<Point>
<coordinates>
-2.8333,23.7889
</coordinates>
</Point>
</Placemark>
<Placemark>
<name>
    T (local)    L (sparse)    </name>
<styleUrl>#icon</styleUrl>
<Point>
<coordinates>
-2.8333,23.2333
</coordinates>
</Point>
</Placemark>
<Placemark>
<name>
B (local)    T (sparse)    L (partial)    </name>
<styleUrl>#icon</styleUrl>
<Point>
<coordinates>
-2.8333,22.6778
</coordinates>
</Point>
</Placemark>
<Placemark>
<name>
B (local)    T (sparse)    L (sparse)    </name>
<styleUrl>#icon</styleUrl>
<Point>
<coordinates>
-2.8333,22.1222
</coordinates>
</Point>
</Placemark>
<Placemark>
<name>
B (local)    T (sparse)    L (sparse)    </name>
<styleUrl>#icon</styleUrl>
<Point>
<coordinates>
-2.8333,21.5667
</coordinates>
</Point>
</Placemark>
<Placemark>
<name>
B (sparse)    T (sparse)    L (local)    </name>
<styleUrl>#icon</styleUrl>
<Point>
<coordinates>
-2.8333,21.0111
</coordinates>
</Point>
</Placemark>
<Placemark>
<name>
B (sparse)    T (sparse)    L (local)    </name>
<styleUrl>#icon</styleUrl>
<Point>
<coordinates>
-2.8333,20.4556
</coordinates>
</Point>
</Placemark>
<Placemark>
<name>
B (sparse)    T (sparse)        </name>
<styleUrl>#icon</styleUrl>
<Point>
<coordinates>
-2.8333,19.9
</coordinates>
</Point>
</Placemark>
<Placemark>
<name>
        L (local)    </name>
<styleUrl>#icon</styleUrl>
<Point>
<coordinates>
-2.8333,19.3444
</coordinates>
</Point>
</Placemark>
<Placemark>
<name>
        L (local)    </name>
<styleUrl>#icon</styleUrl>
<Point>
<coordinates>
-2.8333,18.7889
</coordinates>
</Point>
</Placemark>
<Placemark>
<name>
        L (sparse)    </name>
<styleUrl>#icon</styleUrl>
<Point>
<coordinates>
-2.8333,18.2333
</coordinates>
</Point>
</Placemark>
<Placemark>
<name>
            </name>
<styleUrl>#icon</styleUrl>
<Point>
<coordinates>
-2.8333,17.6778
</coordinates>
</Point>
</Placemark>
<Placemark>
<name>
            </name>
<styleUrl>#icon</styleUrl>
<Point>
<coordinates>
-2.8333,17.1222
</coordinates>
</Point>
</Placemark>
<Placemark>
<name>
            </name>
<styleUrl>#icon</styleUrl>
<Point>
<coordinates>
-2.8333,16.5667
</coordinates>
</Point>
</Placemark>
<Placemark>
<name>
            </name>
<styleUrl>#icon</styleUrl>
<Point>
<coordinates>
-2.8333,16.0111
</coordinates>
</Point>
</Placemark>
<Placemark>
<name>
            </name>
<styleUrl>#icon</styleUrl>
<Point>
<coordinates>
-2.8333,15.4556
</coordinates>
</Point>
</Placemark>
<Placemark>
<name>
            </name>
<styleUrl>#icon</styleUrl>
<Point>
<coordinates>
-2.8333,14.9
</coordinates>
</Point>
</Placemark>
<Placemark>
<name>
            </name>
<styleUrl>#icon</styleUrl>
<Point>
<coordinates>
-2.8333,14.3444
</coordinates>
</Point>
</Placemark>
<Placemark>
<name>
            </name>
<styleUrl>#icon</styleUrl>
<Point>
<coordinates>
-2.8333,13.7889
</coordinates>
</Point>
</Placemark>
<Placemark>
<name>
            </name>
<styleUrl>#icon</styleUrl>
<Point>
<coordinates>
-2.8333,13.2333
</coordinates>
</Point>
</Placemark>
<Placemark>
<name>
            </name>
<styleUrl>#icon</styleUrl>
<Point>
<coordinates>
-2.8333,12.6778
</coordinates>
</Point>
</Placemark>
<Placemark>
<name>
            </name>
<styleUrl>#icon</styleUrl>
<Point>
<coordinates>
-2,41.5667
</coordinates>
</Point>
</Placemark>
<Placemark>
<name>
            </name>
<styleUrl>#icon</styleUrl>
<Point>
<coordinates>
-2,39.9
</coordinates>
</Point>
</Placemark>
<Placemark>
<name>
            </name>
<styleUrl>#icon</styleUrl>
<Point>
<coordinates>
-2,39.3444
</coordinates>
</Point>
</Placemark>
<Placemark>
<name>
            </name>
<styleUrl>#icon</styleUrl>
<Point>
<coordinates>
-2,38.7889
</coordinates>
</Point>
</Placemark>
<Placemark>
<name>
            </name>
<styleUrl>#icon</styleUrl>
<Point>
<coordinates>
-2,38.2333
</coordinates>
</Point>
</Placemark>
<Placemark>
<name>
            </name>
<styleUrl>#icon</styleUrl>
<Point>
<coordinates>
-2,37.6778
</coordinates>
</Point>
</Placemark>
<Placemark>
<name>
            </name>
<styleUrl>#icon</styleUrl>
<Point>
<coordinates>
-2,37.1222
</coordinates>
</Point>
</Placemark>
<Placemark>
<name>
            </name>
<styleUrl>#icon</styleUrl>
<Point>
<coordinates>
-2,34.9
</coordinates>
</Point>
</Placemark>
<Placemark>
<name>
            </name>
<styleUrl>#icon</styleUrl>
<Point>
<coordinates>
-2,34.3444
</coordinates>
</Point>
</Placemark>
<Placemark>
<name>
            </name>
<styleUrl>#icon</styleUrl>
<Point>
<coordinates>
-2,33.7889
</coordinates>
</Point>
</Placemark>
<Placemark>
<name>
    T (local)        </name>
<styleUrl>#icon</styleUrl>
<Point>
<coordinates>
-2,33.2333
</coordinates>
</Point>
</Placemark>
<Placemark>
<name>
    T (local)        </name>
<styleUrl>#icon</styleUrl>
<Point>
<coordinates>
-2,32.6778
</coordinates>
</Point>
</Placemark>
<Placemark>
<name>
    T (local)        </name>
<styleUrl>#icon</styleUrl>
<Point>
<coordinates>
-2,32.1222
</coordinates>
</Point>
</Placemark>
<Placemark>
<name>
    T (sparse)        S (local)</name>
<styleUrl>#icon</styleUrl>
<Point>
<coordinates>
-2,31.5667
</coordinates>
</Point>
</Placemark>
<Placemark>
<name>
    T (partial)        S (sparse)</name>
<styleUrl>#icon</styleUrl>
<Point>
<coordinates>
-2,31.0111
</coordinates>
</Point>
</Placemark>
<Placemark>
<name>
    T (partial)        S (partial)</name>
<styleUrl>#icon</styleUrl>
<Point>
<coordinates>
-2,30.4556
</coordinates>
</Point>
</Placemark>
<Placemark>
<name>
    T (sparse)        S (sparse)</name>
<styleUrl>#icon</styleUrl>
<Point>
<coordinates>
-2,29.9
</coordinates>
</Point>
</Placemark>
<Placemark>
<name>
    T (partial)        S (partial)</name>
<styleUrl>#icon</styleUrl>
<Point>
<coordinates>
-2,29.3444
</coordinates>
</Point>
</Placemark>
<Placemark>
<name>
    T (partial)        S (partial)</name>
<styleUrl>#icon</styleUrl>
<Point>
<coordinates>
-2,28.7889
</coordinates>
</Point>
</Placemark>
<Placemark>
<name>
    T (full)        S (full)</name>
<styleUrl>#icon</styleUrl>
<Point>
<coordinates>
-2,28.2333
</coordinates>
</Point>
</Placemark>
<Placemark>
<name>
    T (full)        S (partial)</name>
<styleUrl>#icon</styleUrl>
<Point>
<coordinates>
-2,27.6778
</coordinates>
</Point>
</Placemark>
<Placemark>
<name>
    T (full)        S (partial)</name>
<styleUrl>#icon</styleUrl>
<Point>
<coordinates>
-2,27.1222
</coordinates>
</Point>
</Placemark>
<Placemark>
<name>
    T (full)        S (sparse)</name>
<styleUrl>#icon</styleUrl>
<Point>
<coordinates>
-2,26.5667
</coordinates>
</Point>
</Placemark>
<Placemark>
<name>
    T (full)        S (local)</name>
<styleUrl>#icon</styleUrl>
<Point>
<coordinates>
-2,26.0111
</coordinates>
</Point>
</Placemark>
<Placemark>
<name>
    T (partial)    L (sparse)    </name>
<styleUrl>#icon</styleUrl>
<Point>
<coordinates>
-2,25.4556
</coordinates>
</Point>
</Placemark>
<Placemark>
<name>
B (local)    T (partial)    L (partial)    </name>
<styleUrl>#icon</styleUrl>
<Point>
<coordinates>
-2,24.9
</coordinates>
</Point>
</Placemark>
<Placemark>
<name>
B (local)    T (local)    L (sparse)    </name>
<styleUrl>#icon</styleUrl>
<Point>
<coordinates>
-2,24.3444
</coordinates>
</Point>
</Placemark>
<Placemark>
<name>
B (sparse)    T (local)    L (sparse)    </name>
<styleUrl>#icon</styleUrl>
<Point>
<coordinates>
-2,23.7889
</coordinates>
</Point>
</Placemark>
<Placemark>
<name>
B (sparse)    T (sparse)    L (sparse)    </name>
<styleUrl>#icon</styleUrl>
<Point>
<coordinates>
-2,23.2333
</coordinates>
</Point>
</Placemark>
<Placemark>
<name>
B (sparse)    T (sparse)    L (local)    </name>
<styleUrl>#icon</styleUrl>
<Point>
<coordinates>
-2,22.6778
</coordinates>
</Point>
</Placemark>
<Placemark>
<name>
B (sparse)    T (sparse)    L (local)    </name>
<styleUrl>#icon</styleUrl>
<Point>
<coordinates>
-2,22.1222
</coordinates>
</Point>
</Placemark>
<Placemark>
<name>
B (sparse)    T (sparse)    L (sparse)    </name>
<styleUrl>#icon</styleUrl>
<Point>
<coordinates>
-2,21.5667
</coordinates>
</Point>
</Placemark>
<Placemark>
<name>
B (sparse)    T (partial)    L (sparse)    </name>
<styleUrl>#icon</styleUrl>
<Point>
<coordinates>
-2,21.0111
</coordinates>
</Point>
</Placemark>
<Placemark>
<name>
B (local)    T (partial)    L (sparse)    </name>
<styleUrl>#icon</styleUrl>
<Point>
<coordinates>
-2,20.4556
</coordinates>
</Point>
</Placemark>
<Placemark>
<name>
    T (sparse)    L (sparse)    </name>
<styleUrl>#icon</styleUrl>
<Point>
<coordinates>
-2,19.9
</coordinates>
</Point>
</Placemark>
<Placemark>
<name>
        L (sparse)    </name>
<styleUrl>#icon</styleUrl>
<Point>
<coordinates>
-2,19.3444
</coordinates>
</Point>
</Placemark>
<Placemark>
<name>
        L (sparse)    </name>
<styleUrl>#icon</styleUrl>
<Point>
<coordinates>
-2,18.7889
</coordinates>
</Point>
</Placemark>
<Placemark>
<name>
        L (local)    </name>
<styleUrl>#icon</styleUrl>
<Point>
<coordinates>
-2,18.2333
</coordinates>
</Point>
</Placemark>
<Placemark>
<name>
            </name>
<styleUrl>#icon</styleUrl>
<Point>
<coordinates>
-2,17.6778
</coordinates>
</Point>
</Placemark>
<Placemark>
<name>
            </name>
<styleUrl>#icon</styleUrl>
<Point>
<coordinates>
-2,17.1222
</coordinates>
</Point>
</Placemark>
<Placemark>
<name>
            </name>
<styleUrl>#icon</styleUrl>
<Point>
<coordinates>
-2,16.5667
</coordinates>
</Point>
</Placemark>
<Placemark>
<name>
            </name>
<styleUrl>#icon</styleUrl>
<Point>
<coordinates>
-2,16.0111
</coordinates>
</Point>
</Placemark>
<Placemark>
<name>
            </name>
<styleUrl>#icon</styleUrl>
<Point>
<coordinates>
-2,15.4556
</coordinates>
</Point>
</Placemark>
<Placemark>
<name>
            </name>
<styleUrl>#icon</styleUrl>
<Point>
<coordinates>
-2,14.9
</coordinates>
</Point>
</Placemark>
<Placemark>
<name>
            </name>
<styleUrl>#icon</styleUrl>
<Point>
<coordinates>
-2,14.3444
</coordinates>
</Point>
</Placemark>
<Placemark>
<name>
            </name>
<styleUrl>#icon</styleUrl>
<Point>
<coordinates>
-2,13.7889
</coordinates>
</Point>
</Placemark>
<Placemark>
<name>
            </name>
<styleUrl>#icon</styleUrl>
<Point>
<coordinates>
-2,13.2333
</coordinates>
</Point>
</Placemark>
<Placemark>
<name>
            </name>
<styleUrl>#icon</styleUrl>
<Point>
<coordinates>
-2,12.6778
</coordinates>
</Point>
</Placemark>
<Placemark>
<name>
            </name>
<styleUrl>#icon</styleUrl>
<Point>
<coordinates>
-1.1667,42.6778
</coordinates>
</Point>
</Placemark>
<Placemark>
<name>
            </name>
<styleUrl>#icon</styleUrl>
<Point>
<coordinates>
-1.1667,42.1222
</coordinates>
</Point>
</Placemark>
<Placemark>
<name>
            </name>
<styleUrl>#icon</styleUrl>
<Point>
<coordinates>
-1.1667,41.5667
</coordinates>
</Point>
</Placemark>
<Placemark>
<name>
            </name>
<styleUrl>#icon</styleUrl>
<Point>
<coordinates>
-1.1667,41.0111
</coordinates>
</Point>
</Placemark>
<Placemark>
<name>
            </name>
<styleUrl>#icon</styleUrl>
<Point>
<coordinates>
-1.1667,40.4556
</coordinates>
</Point>
</Placemark>
<Placemark>
<name>
            </name>
<styleUrl>#icon</styleUrl>
<Point>
<coordinates>
-1.1667,39.9
</coordinates>
</Point>
</Placemark>
<Placemark>
<name>
            </name>
<styleUrl>#icon</styleUrl>
<Point>
<coordinates>
-1.1667,39.3444
</coordinates>
</Point>
</Placemark>
<Placemark>
<name>
            </name>
<styleUrl>#icon</styleUrl>
<Point>
<coordinates>
-1.1667,38.7889
</coordinates>
</Point>
</Placemark>
<Placemark>
<name>
            </name>
<styleUrl>#icon</styleUrl>
<Point>
<coordinates>
-1.1667,38.2333
</coordinates>
</Point>
</Placemark>
<Placemark>
<name>
            </name>
<styleUrl>#icon</styleUrl>
<Point>
<coordinates>
-1.1667,34.3444
</coordinates>
</Point>
</Placemark>
<Placemark>
<name>
B (local)    T (local)        </name>
<styleUrl>#icon</styleUrl>
<Point>
<coordinates>
-1.1667,33.7889
</coordinates>
</Point>
</Placemark>
<Placemark>
<name>
B (local)    T (local)        </name>
<styleUrl>#icon</styleUrl>
<Point>
<coordinates>
-1.1667,33.2333
</coordinates>
</Point>
</Placemark>
<Placemark>
<name>
    T (local)        </name>
<styleUrl>#icon</styleUrl>
<Point>
<coordinates>
-1.1667,32.6778
</coordinates>
</Point>
</Placemark>
<Placemark>
<name>
    T (local)        </name>
<styleUrl>#icon</styleUrl>
<Point>
<coordinates>
-1.1667,32.1222
</coordinates>
</Point>
</Placemark>
<Placemark>
<name>
    T (sparse)        </name>
<styleUrl>#icon</styleUrl>
<Point>
<coordinates>
-1.1667,31.5667
</coordinates>
</Point>
</Placemark>
<Placemark>
<name>
    T (partial)        S (sparse)</name>
<styleUrl>#icon</styleUrl>
<Point>
<coordinates>
-1.1667,31.0111
</coordinates>
</Point>
</Placemark>
<Placemark>
<name>
    T (full)        S (sparse)</name>
<styleUrl>#icon</styleUrl>
<Point>
<coordinates>
-1.1667,30.4556
</coordinates>
</Point>
</Placemark>
<Placemark>
<name>
    T (full)        S (partial)</name>
<styleUrl>#icon</styleUrl>
<Point>
<coordinates>
-1.1667,29.9
</coordinates>
</Point>
</Placemark>
<Placemark>
<name>
    T (partial)        S (partial)</name>
<styleUrl>#icon</styleUrl>
<Point>
<coordinates>
-1.1667,29.3444
</coordinates>
</Point>
</Placemark>
<Placemark>
<name>
B (sparse)    T (partial)        S (partial)</name>
<styleUrl>#icon</styleUrl>
<Point>
<coordinates>
-1.1667,28.7889
</coordinates>
</Point>
</Placemark>
<Placemark>
<name>
B (local)    T (partial)        S (sparse)</name>
<styleUrl>#icon</styleUrl>
<Point>
<coordinates>
-1.1667,28.2333
</coordinates>
</Point>
</Placemark>
<Placemark>
<name>
    T (partial)    L (sparse)    S (local)</name>
<styleUrl>#icon</styleUrl>
<Point>
<coordinates>
-1.1667,27.6778
</coordinates>
</Point>
</Placemark>
<Placemark>
<name>
    T (full)    L (sparse)    S (local)</name>
<styleUrl>#icon</styleUrl>
<Point>
<coordinates>
-1.1667,27.1222
</coordinates>
</Point>
</Placemark>
<Placemark>
<name>
    T (full)    L (sparse)    S (local)</name>
<styleUrl>#icon</styleUrl>
<Point>
<coordinates>
-1.1667,26.5667
</coordinates>
</Point>
</Placemark>
<Placemark>
<name>
    T (full)    L (sparse)    S (local)</name>
<styleUrl>#icon</styleUrl>
<Point>
<coordinates>
-1.1667,26.0111
</coordinates>
</Point>
</Placemark>
<Placemark>
<name>
B (sparse)    T (partial)    L (sparse)    </name>
<styleUrl>#icon</styleUrl>
<Point>
<coordinates>
-1.1667,25.4556
</coordinates>
</Point>
</Placemark>
<Placemark>
<name>
B (sparse)    T (sparse)    L (local)    </name>
<styleUrl>#icon</styleUrl>
<Point>
<coordinates>
-1.1667,24.9
</coordinates>
</Point>
</Placemark>
<Placemark>
<name>
B (sparse)    T (sparse)        </name>
<styleUrl>#icon</styleUrl>
<Point>
<coordinates>
-1.1667,24.3444
</coordinates>
</Point>
</Placemark>
<Placemark>
<name>
B (local)            </name>
<styleUrl>#icon</styleUrl>
<Point>
<coordinates>
-1.1667,23.7889
</coordinates>
</Point>
</Placemark>
<Placemark>
<name>
B (sparse)    T (sparse)    L (local)    </name>
<styleUrl>#icon</styleUrl>
<Point>
<coordinates>
-1.1667,23.2333
</coordinates>
</Point>
</Placemark>
<Placemark>
<name>
B (sparse)    T (sparse)        </name>
<styleUrl>#icon</styleUrl>
<Point>
<coordinates>
-1.1667,22.6778
</coordinates>
</Point>
</Placemark>
<Placemark>
<name>
    T (local)    L (local)    </name>
<styleUrl>#icon</styleUrl>
<Point>
<coordinates>
-1.1667,22.1222
</coordinates>
</Point>
</Placemark>
<Placemark>
<name>
B (local)    T (sparse)    L (partial)    </name>
<styleUrl>#icon</styleUrl>
<Point>
<coordinates>
-1.1667,21.5667
</coordinates>
</Point>
</Placemark>
<Placemark>
<name>
B (sparse)    T (partial)    L (partial)    </name>
<styleUrl>#icon</styleUrl>
<Point>
<coordinates>
-1.1667,21.0111
</coordinates>
</Point>
</Placemark>
<Placemark>
<name>
B (local)    T (sparse)    L (partial)    </name>
<styleUrl>#icon</styleUrl>
<Point>
<coordinates>
-1.1667,20.4556
</coordinates>
</Point>
</Placemark>
<Placemark>
<name>
B (sparse)    T (sparse)    L (partial)    </name>
<styleUrl>#icon</styleUrl>
<Point>
<coordinates>
-1.1667,19.9
</coordinates>
</Point>
</Placemark>
<Placemark>
<name>
        L (sparse)    </name>
<styleUrl>#icon</styleUrl>
<Point>
<coordinates>
-1.1667,19.3444
</coordinates>
</Point>
</Placemark>
<Placemark>
<name>
        L (sparse)    </name>
<styleUrl>#icon</styleUrl>
<Point>
<coordinates>
-1.1667,18.7889
</coordinates>
</Point>
</Placemark>
<Placemark>
<name>
            </name>
<styleUrl>#icon</styleUrl>
<Point>
<coordinates>
-1.1667,18.2333
</coordinates>
</Point>
</Placemark>
<Placemark>
<name>
            </name>
<styleUrl>#icon</styleUrl>
<Point>
<coordinates>
-1.1667,17.6778
</coordinates>
</Point>
</Placemark>
<Placemark>
<name>
        L (local)    </name>
<styleUrl>#icon</styleUrl>
<Point>
<coordinates>
-1.1667,17.1222
</coordinates>
</Point>
</Placemark>
<Placemark>
<name>
            </name>
<styleUrl>#icon</styleUrl>
<Point>
<coordinates>
-1.1667,16.5667
</coordinates>
</Point>
</Placemark>
<Placemark>
<name>
            </name>
<styleUrl>#icon</styleUrl>
<Point>
<coordinates>
-1.1667,16.0111
</coordinates>
</Point>
</Placemark>
<Placemark>
<name>
            </name>
<styleUrl>#icon</styleUrl>
<Point>
<coordinates>
-1.1667,15.4556
</coordinates>
</Point>
</Placemark>
<Placemark>
<name>
            </name>
<styleUrl>#icon</styleUrl>
<Point>
<coordinates>
-1.1667,14.9
</coordinates>
</Point>
</Placemark>
<Placemark>
<name>
            </name>
<styleUrl>#icon</styleUrl>
<Point>
<coordinates>
-1.1667,14.3444
</coordinates>
</Point>
</Placemark>
<Placemark>
<name>
            </name>
<styleUrl>#icon</styleUrl>
<Point>
<coordinates>
-1.1667,13.7889
</coordinates>
</Point>
</Placemark>
<Placemark>
<name>
            </name>
<styleUrl>#icon</styleUrl>
<Point>
<coordinates>
-1.1667,13.2333
</coordinates>
</Point>
</Placemark>
<Placemark>
<name>
            </name>
<styleUrl>#icon</styleUrl>
<Point>
<coordinates>
-1.1667,12.6778
</coordinates>
</Point>
</Placemark>
<Placemark>
<name>
            </name>
<styleUrl>#icon</styleUrl>
<Point>
<coordinates>
-0.33333,42.1222
</coordinates>
</Point>
</Placemark>
<Placemark>
<name>
            </name>
<styleUrl>#icon</styleUrl>
<Point>
<coordinates>
-0.33333,41.5667
</coordinates>
</Point>
</Placemark>
<Placemark>
<name>
            </name>
<styleUrl>#icon</styleUrl>
<Point>
<coordinates>
-0.33333,41.0111
</coordinates>
</Point>
</Placemark>
<Placemark>
<name>
            </name>
<styleUrl>#icon</styleUrl>
<Point>
<coordinates>
-0.33333,40.4556
</coordinates>
</Point>
</Placemark>
<Placemark>
<name>
            </name>
<styleUrl>#icon</styleUrl>
<Point>
<coordinates>
-0.33333,39.9
</coordinates>
</Point>
</Placemark>
<Placemark>
<name>
            </name>
<styleUrl>#icon</styleUrl>
<Point>
<coordinates>
-0.33333,39.3444
</coordinates>
</Point>
</Placemark>
<Placemark>
<name>
            </name>
<styleUrl>#icon</styleUrl>
<Point>
<coordinates>
-0.33333,38.7889
</coordinates>
</Point>
</Placemark>
<Placemark>
<name>
            </name>
<styleUrl>#icon</styleUrl>
<Point>
<coordinates>
-0.33333,34.9
</coordinates>
</Point>
</Placemark>
<Placemark>
<name>
B (local)            </name>
<styleUrl>#icon</styleUrl>
<Point>
<coordinates>
-0.33333,34.3444
</coordinates>
</Point>
</Placemark>
<Placemark>
<name>
    T (local)        </name>
<styleUrl>#icon</styleUrl>
<Point>
<coordinates>
-0.33333,33.7889
</coordinates>
</Point>
</Placemark>
<Placemark>
<name>
B (local)    T (local)        </name>
<styleUrl>#icon</styleUrl>
<Point>
<coordinates>
-0.33333,33.2333
</coordinates>
</Point>
</Placemark>
<Placemark>
<name>
    T (local)    L (local)    </name>
<styleUrl>#icon</styleUrl>
<Point>
<coordinates>
-0.33333,32.6778
</coordinates>
</Point>
</Placemark>
<Placemark>
<name>
    T (local)    L (local)    </name>
<styleUrl>#icon</styleUrl>
<Point>
<coordinates>
-0.33333,32.1222
</coordinates>
</Point>
</Placemark>
<Placemark>
<name>
    T (local)        </name>
<styleUrl>#icon</styleUrl>
<Point>
<coordinates>
-0.33333,31.5667
</coordinates>
</Point>
</Placemark>
<Placemark>
<name>
    T (sparse)        </name>
<styleUrl>#icon</styleUrl>
<Point>
<coordinates>
-0.33333,31.0111
</coordinates>
</Point>
</Placemark>
<Placemark>
<name>
    T (partial)    L (partial)    </name>
<styleUrl>#icon</styleUrl>
<Point>
<coordinates>
-0.33333,30.4556
</coordinates>
</Point>
</Placemark>
<Placemark>
<name>
    T (full)        </name>
<styleUrl>#icon</styleUrl>
<Point>
<coordinates>
-0.33333,29.9
</coordinates>
</Point>
</Placemark>
<Placemark>
<name>
B (local)    T (partial)        S (partial)</name>
<styleUrl>#icon</styleUrl>
<Point>
<coordinates>
-0.33333,29.3444
</coordinates>
</Point>
</Placemark>
<Placemark>
<name>
B (local)    T (sparse)        </name>
<styleUrl>#icon</styleUrl>
<Point>
<coordinates>
-0.33333,28.7889
</coordinates>
</Point>
</Placemark>
<Placemark>
<name>
B (local)    T (sparse)    L (local)    </name>
<styleUrl>#icon</styleUrl>
<Point>
<coordinates>
-0.33333,28.2333
</coordinates>
</Point>
</Placemark>
<Placemark>
<name>
B (local)    T (sparse)        </name>
<styleUrl>#icon</styleUrl>
<Point>
<coordinates>
-0.33333,27.6778
</coordinates>
</Point>
</Placemark>
<Placemark>
<name>
B (sparse)    T (sparse)        </name>
<styleUrl>#icon</styleUrl>
<Point>
<coordinates>
-0.33333,27.1222
</coordinates>
</Point>
</Placemark>
<Placemark>
<name>
    T (sparse)    L (sparse)    </name>
<styleUrl>#icon</styleUrl>
<Point>
<coordinates>
-0.33333,26.5667
</coordinates>
</Point>
</Placemark>
<Placemark>
<name>
B (local)    T (local)    L (sparse)    </name>
<styleUrl>#icon</styleUrl>
<Point>
<coordinates>
-0.33333,26.0111
</coordinates>
</Point>
</Placemark>
<Placemark>
<name>
    T (local)        </name>
<styleUrl>#icon</styleUrl>
<Point>
<coordinates>
-0.33333,25.4556
</coordinates>
</Point>
</Placemark>
<Placemark>
<name>
            </name>
<styleUrl>#icon</styleUrl>
<Point>
<coordinates>
-0.33333,24.9
</coordinates>
</Point>
</Placemark>
<Placemark>
<name>
            </name>
<styleUrl>#icon</styleUrl>
<Point>
<coordinates>
-0.33333,24.3444
</coordinates>
</Point>
</Placemark>
<Placemark>
<name>
B (local)    T (local)        </name>
<styleUrl>#icon</styleUrl>
<Point>
<coordinates>
-0.33333,23.7889
</coordinates>
</Point>
</Placemark>
<Placemark>
<name>
B (local)    T (local)    L (local)    </name>
<styleUrl>#icon</styleUrl>
<Point>
<coordinates>
-0.33333,23.2333
</coordinates>
</Point>
</Placemark>
<Placemark>
<name>
B (local)    T (local)    L (local)    </name>
<styleUrl>#icon</styleUrl>
<Point>
<coordinates>
-0.33333,22.6778
</coordinates>
</Point>
</Placemark>
<Placemark>
<name>
    T (local)    L (sparse)    </name>
<styleUrl>#icon</styleUrl>
<Point>
<coordinates>
-0.33333,22.1222
</coordinates>
</Point>
</Placemark>
<Placemark>
<name>
    T (sparse)    L (sparse)    S (local)</name>
<styleUrl>#icon</styleUrl>
<Point>
<coordinates>
-0.33333,21.5667
</coordinates>
</Point>
</Placemark>
<Placemark>
<name>
    T (sparse)    L (sparse)    S (local)</name>
<styleUrl>#icon</styleUrl>
<Point>
<coordinates>
-0.33333,21.0111
</coordinates>
</Point>
</Placemark>
<Placemark>
<name>
B (local)    T (local)    L (local)    </name>
<styleUrl>#icon</styleUrl>
<Point>
<coordinates>
-0.33333,20.4556
</coordinates>
</Point>
</Placemark>
<Placemark>
<name>
B (sparse)    T (sparse)    L (sparse)    </name>
<styleUrl>#icon</styleUrl>
<Point>
<coordinates>
-0.33333,19.9
</coordinates>
</Point>
</Placemark>
<Placemark>
<name>
B (sparse)    T (sparse)    L (sparse)    </name>
<styleUrl>#icon</styleUrl>
<Point>
<coordinates>
-0.33333,19.3444
</coordinates>
</Point>
</Placemark>
<Placemark>
<name>
        L (local)    </name>
<styleUrl>#icon</styleUrl>
<Point>
<coordinates>
-0.33333,18.7889
</coordinates>
</Point>
</Placemark>
<Placemark>
<name>
        L (local)    </name>
<styleUrl>#icon</styleUrl>
<Point>
<coordinates>
-0.33333,18.2333
</coordinates>
</Point>
</Placemark>
<Placemark>
<name>
            </name>
<styleUrl>#icon</styleUrl>
<Point>
<coordinates>
-0.33333,17.6778
</coordinates>
</Point>
</Placemark>
<Placemark>
<name>
        L (partial)    </name>
<styleUrl>#icon</styleUrl>
<Point>
<coordinates>
-0.33333,17.1222
</coordinates>
</Point>
</Placemark>
<Placemark>
<name>
            </name>
<styleUrl>#icon</styleUrl>
<Point>
<coordinates>
-0.33333,16.5667
</coordinates>
</Point>
</Placemark>
<Placemark>
<name>
            </name>
<styleUrl>#icon</styleUrl>
<Point>
<coordinates>
-0.33333,16.0111
</coordinates>
</Point>
</Placemark>
<Placemark>
<name>
            </name>
<styleUrl>#icon</styleUrl>
<Point>
<coordinates>
-0.33333,15.4556
</coordinates>
</Point>
</Placemark>
<Placemark>
<name>
            </name>
<styleUrl>#icon</styleUrl>
<Point>
<coordinates>
-0.33333,14.9
</coordinates>
</Point>
</Placemark>
<Placemark>
<name>
            </name>
<styleUrl>#icon</styleUrl>
<Point>
<coordinates>
-0.33333,14.3444
</coordinates>
</Point>
</Placemark>
<Placemark>
<name>
            </name>
<styleUrl>#icon</styleUrl>
<Point>
<coordinates>
-0.33333,13.7889
</coordinates>
</Point>
</Placemark>
<Placemark>
<name>
            </name>
<styleUrl>#icon</styleUrl>
<Point>
<coordinates>
-0.33333,13.2333
</coordinates>
</Point>
</Placemark>
<Placemark>
<name>
            </name>
<styleUrl>#icon</styleUrl>
<Point>
<coordinates>
-0.33333,12.6778
</coordinates>
</Point>
</Placemark>
<Placemark>
<name>
            </name>
<styleUrl>#icon</styleUrl>
<Point>
<coordinates>
0.5,42.1222
</coordinates>
</Point>
</Placemark>
<Placemark>
<name>
            </name>
<styleUrl>#icon</styleUrl>
<Point>
<coordinates>
0.5,41.5667
</coordinates>
</Point>
</Placemark>
<Placemark>
<name>
            </name>
<styleUrl>#icon</styleUrl>
<Point>
<coordinates>
0.5,41.0111
</coordinates>
</Point>
</Placemark>
<Placemark>
<name>
            </name>
<styleUrl>#icon</styleUrl>
<Point>
<coordinates>
0.5,34.9
</coordinates>
</Point>
</Placemark>
<Placemark>
<name>
B (sparse)    T (sparse)        </name>
<styleUrl>#icon</styleUrl>
<Point>
<coordinates>
0.5,34.3444
</coordinates>
</Point>
</Placemark>
<Placemark>
<name>
B (sparse)    T (sparse)        </name>
<styleUrl>#icon</styleUrl>
<Point>
<coordinates>
0.5,33.7889
</coordinates>
</Point>
</Placemark>
<Placemark>
<name>
    T (sparse)        </name>
<styleUrl>#icon</styleUrl>
<Point>
<coordinates>
0.5,33.2333
</coordinates>
</Point>
</Placemark>
<Placemark>
<name>
    T (sparse)        </name>
<styleUrl>#icon</styleUrl>
<Point>
<coordinates>
0.5,32.6778
</coordinates>
</Point>
</Placemark>
<Placemark>
<name>
    T (local)        </name>
<styleUrl>#icon</styleUrl>
<Point>
<coordinates>
0.5,32.1222
</coordinates>
</Point>
</Placemark>
<Placemark>
<name>
    T (sparse)        S (sparse)</name>
<styleUrl>#icon</styleUrl>
<Point>
<coordinates>
0.5,31.5667
</coordinates>
</Point>
</Placemark>
<Placemark>
<name>
    T (partial)        S (sparse)</name>
<styleUrl>#icon</styleUrl>
<Point>
<coordinates>
0.5,31.0111
</coordinates>
</Point>
</Placemark>
<Placemark>
<name>
    T (full)        S (local)</name>
<styleUrl>#icon</styleUrl>
<Point>
<coordinates>
0.5,30.4556
</coordinates>
</Point>
</Placemark>
<Placemark>
<name>
    T (partial)        </name>
<styleUrl>#icon</styleUrl>
<Point>
<coordinates>
0.5,29.9
</coordinates>
</Point>
</Placemark>
<Placemark>
<name>
B (local)    T (sparse)        </name>
<styleUrl>#icon</styleUrl>
<Point>
<coordinates>
0.5,29.3444
</coordinates>
</Point>
</Placemark>
<Placemark>
<name>
    T (local)        </name>
<styleUrl>#icon</styleUrl>
<Point>
<coordinates>
0.5,28.7889
</coordinates>
</Point>
</Placemark>
<Placemark>
<name>
            </name>
<styleUrl>#icon</styleUrl>
<Point>
<coordinates>
0.5,28.2333
</coordinates>
</Point>
</Placemark>
<Placemark>
<name>
            </name>
<styleUrl>#icon</styleUrl>
<Point>
<coordinates>
0.5,27.6778
</coordinates>
</Point>
</Placemark>
<Placemark>
<name>
B (local)            </name>
<styleUrl>#icon</styleUrl>
<Point>
<coordinates>
0.5,27.1222
</coordinates>
</Point>
</Placemark>
<Placemark>
<name>
B (local)        L (local)    </name>
<styleUrl>#icon</styleUrl>
<Point>
<coordinates>
0.5,26.5667
</coordinates>
</Point>
</Placemark>
<Placemark>
<name>
B (local)    T (local)    L (local)    </name>
<styleUrl>#icon</styleUrl>
<Point>
<coordinates>
0.5,26.0111
</coordinates>
</Point>
</Placemark>
<Placemark>
<name>
B (local)    T (local)    L (local)    </name>
<styleUrl>#icon</styleUrl>
<Point>
<coordinates>
0.5,25.4556
</coordinates>
</Point>
</Placemark>
<Placemark>
<name>
            </name>
<styleUrl>#icon</styleUrl>
<Point>
<coordinates>
0.5,24.9
</coordinates>
</Point>
</Placemark>
<Placemark>
<name>
    T (local)        </name>
<styleUrl>#icon</styleUrl>
<Point>
<coordinates>
0.5,24.3444
</coordinates>
</Point>
</Placemark>
<Placemark>
<name>
B (local)    T (sparse)        </name>
<styleUrl>#icon</styleUrl>
<Point>
<coordinates>
0.5,23.7889
</coordinates>
</Point>
</Placemark>
<Placemark>
<name>
        L (sparse)    </name>
<styleUrl>#icon</styleUrl>
<Point>
<coordinates>
0.5,23.2333
</coordinates>
</Point>
</Placemark>
<Placemark>
<name>
        L (sparse)    </name>
<styleUrl>#icon</styleUrl>
<Point>
<coordinates>
0.5,22.6778
</coordinates>
</Point>
</Placemark>
<Placemark>
<name>
    T (sparse)    L (sparse)    </name>
<styleUrl>#icon</styleUrl>
<Point>
<coordinates>
0.5,22.1222
</coordinates>
</Point>
</Placemark>
<Placemark>
<name>
    T (partial)    L (partial)    </name>
<styleUrl>#icon</styleUrl>
<Point>
<coordinates>
0.5,21.5667
</coordinates>
</Point>
</Placemark>
<Placemark>
<name>
    T (sparse)    L (sparse)    </name>
<styleUrl>#icon</styleUrl>
<Point>
<coordinates>
0.5,21.0111
</coordinates>
</Point>
</Placemark>
<Placemark>
<name>
            </name>
<styleUrl>#icon</styleUrl>
<Point>
<coordinates>
0.5,20.4556
</coordinates>
</Point>
</Placemark>
<Placemark>
<name>
    T (local)    L (local)    </name>
<styleUrl>#icon</styleUrl>
<Point>
<coordinates>
0.5,19.9
</coordinates>
</Point>
</Placemark>
<Placemark>
<name>
        L (local)    </name>
<styleUrl>#icon</styleUrl>
<Point>
<coordinates>
0.5,19.3444
</coordinates>
</Point>
</Placemark>
<Placemark>
<name>
        L (local)    </name>
<styleUrl>#icon</styleUrl>
<Point>
<coordinates>
0.5,18.7889
</coordinates>
</Point>
</Placemark>
<Placemark>
<name>
        L (local)    </name>
<styleUrl>#icon</styleUrl>
<Point>
<coordinates>
0.5,18.2333
</coordinates>
</Point>
</Placemark>
<Placemark>
<name>
            </name>
<styleUrl>#icon</styleUrl>
<Point>
<coordinates>
0.5,17.6778
</coordinates>
</Point>
</Placemark>
<Placemark>
<name>
        L (local)    </name>
<styleUrl>#icon</styleUrl>
<Point>
<coordinates>
0.5,17.1222
</coordinates>
</Point>
</Placemark>
<Placemark>
<name>
            </name>
<styleUrl>#icon</styleUrl>
<Point>
<coordinates>
0.5,16.5667
</coordinates>
</Point>
</Placemark>
<Placemark>
<name>
            </name>
<styleUrl>#icon</styleUrl>
<Point>
<coordinates>
0.5,16.0111
</coordinates>
</Point>
</Placemark>
<Placemark>
<name>
            </name>
<styleUrl>#icon</styleUrl>
<Point>
<coordinates>
0.5,15.4556
</coordinates>
</Point>
</Placemark>
<Placemark>
<name>
            </name>
<styleUrl>#icon</styleUrl>
<Point>
<coordinates>
0.5,14.9
</coordinates>
</Point>
</Placemark>
<Placemark>
<name>
            </name>
<styleUrl>#icon</styleUrl>
<Point>
<coordinates>
0.5,14.3444
</coordinates>
</Point>
</Placemark>
<Placemark>
<name>
            </name>
<styleUrl>#icon</styleUrl>
<Point>
<coordinates>
0.5,13.7889
</coordinates>
</Point>
</Placemark>
<Placemark>
<name>
            </name>
<styleUrl>#icon</styleUrl>
<Point>
<coordinates>
0.5,13.2333
</coordinates>
</Point>
</Placemark>
<Placemark>
<name>
            </name>
<styleUrl>#icon</styleUrl>
<Point>
<coordinates>
0.5,12.6778
</coordinates>
</Point>
</Placemark>
<Placemark>
<name>
            </name>
<styleUrl>#icon</styleUrl>
<Point>
<coordinates>
1.3333,41.5667
</coordinates>
</Point>
</Placemark>
<Placemark>
<name>
            </name>
<styleUrl>#icon</styleUrl>
<Point>
<coordinates>
1.3333,35.4556
</coordinates>
</Point>
</Placemark>
<Placemark>
<name>
B (local)            </name>
<styleUrl>#icon</styleUrl>
<Point>
<coordinates>
1.3333,34.9
</coordinates>
</Point>
</Placemark>
<Placemark>
<name>
B (sparse)    T (sparse)        </name>
<styleUrl>#icon</styleUrl>
<Point>
<coordinates>
1.3333,34.3444
</coordinates>
</Point>
</Placemark>
<Placemark>
<name>
            </name>
<styleUrl>#icon</styleUrl>
<Point>
<coordinates>
1.3333,33.7889
</coordinates>
</Point>
</Placemark>
<Placemark>
<name>
B (local)    T (sparse)        </name>
<styleUrl>#icon</styleUrl>
<Point>
<coordinates>
1.3333,33.2333
</coordinates>
</Point>
</Placemark>
<Placemark>
<name>
B (local)    T (sparse)        </name>
<styleUrl>#icon</styleUrl>
<Point>
<coordinates>
1.3333,32.6778
</coordinates>
</Point>
</Placemark>
<Placemark>
<name>
B (local)    T (sparse)        </name>
<styleUrl>#icon</styleUrl>
<Point>
<coordinates>
1.3333,32.1222
</coordinates>
</Point>
</Placemark>
<Placemark>
<name>
    T (sparse)        S (local)</name>
<styleUrl>#icon</styleUrl>
<Point>
<coordinates>
1.3333,31.5667
</coordinates>
</Point>
</Placemark>
<Placemark>
<name>
    T (partial)        S (sparse)</name>
<styleUrl>#icon</styleUrl>
<Point>
<coordinates>
1.3333,31.0111
</coordinates>
</Point>
</Placemark>
<Placemark>
<name>
    T (partial)        S (sparse)</name>
<styleUrl>#icon</styleUrl>
<Point>
<coordinates>
1.3333,30.4556
</coordinates>
</Point>
</Placemark>
<Placemark>
<name>
B (local)    T (sparse)        </name>
<styleUrl>#icon</styleUrl>
<Point>
<coordinates>
1.3333,29.9
</coordinates>
</Point>
</Placemark>
<Placemark>
<name>
B (local)    T (sparse)        S (local)</name>
<styleUrl>#icon</styleUrl>
<Point>
<coordinates>
1.3333,29.3444
</coordinates>
</Point>
</Placemark>
<Placemark>
<name>
            </name>
<styleUrl>#icon</styleUrl>
<Point>
<coordinates>
1.3333,28.7889
</coordinates>
</Point>
</Placemark>
<Placemark>
<name>
            </name>
<styleUrl>#icon</styleUrl>
<Point>
<coordinates>
1.3333,28.2333
</coordinates>
</Point>
</Placemark>
<Placemark>
<name>
            </name>
<styleUrl>#icon</styleUrl>
<Point>
<coordinates>
1.3333,27.6778
</coordinates>
</Point>
</Placemark>
<Placemark>
<name>
B (local)        L (local)    </name>
<styleUrl>#icon</styleUrl>
<Point>
<coordinates>
1.3333,27.1222
</coordinates>
</Point>
</Placemark>
<Placemark>
<name>
B (sparse)        L (sparse)    </name>
<styleUrl>#icon</styleUrl>
<Point>
<coordinates>
1.3333,26.5667
</coordinates>
</Point>
</Placemark>
<Placemark>
<name>
B (sparse)        L (sparse)    </name>
<styleUrl>#icon</styleUrl>
<Point>
<coordinates>
1.3333,26.0111
</coordinates>
</Point>
</Placemark>
<Placemark>
<name>
B (sparse)        L (sparse)    S (local)</name>
<styleUrl>#icon</styleUrl>
<Point>
<coordinates>
1.3333,25.4556
</coordinates>
</Point>
</Placemark>
<Placemark>
<name>
    T (local)    L (local)    </name>
<styleUrl>#icon</styleUrl>
<Point>
<coordinates>
1.3333,24.9
</coordinates>
</Point>
</Placemark>
<Placemark>
<name>
    T (sparse)        </name>
<styleUrl>#icon</styleUrl>
<Point>
<coordinates>
1.3333,24.3444
</coordinates>
</Point>
</Placemark>
<Placemark>
<name>
    T (sparse)        </name>
<styleUrl>#icon</styleUrl>
<Point>
<coordinates>
1.3333,23.7889
</coordinates>
</Point>
</Placemark>
<Placemark>
<name>
    T (sparse)    L (sparse)    </name>
<styleUrl>#icon</styleUrl>
<Point>
<coordinates>
1.3333,23.2333
</coordinates>
</Point>
</Placemark>
<Placemark>
<name>
    T (local)    L (local)    </name>
<styleUrl>#icon</styleUrl>
<Point>
<coordinates>
1.3333,22.6778
</coordinates>
</Point>
</Placemark>
<Placemark>
<name>
    T (local)    L (local)    </name>
<styleUrl>#icon</styleUrl>
<Point>
<coordinates>
1.3333,22.1222
</coordinates>
</Point>
</Placemark>
<Placemark>
<name>
    T (sparse)    L (sparse)    </name>
<styleUrl>#icon</styleUrl>
<Point>
<coordinates>
1.3333,21.5667
</coordinates>
</Point>
</Placemark>
<Placemark>
<name>
        L (local)    </name>
<styleUrl>#icon</styleUrl>
<Point>
<coordinates>
1.3333,21.0111
</coordinates>
</Point>
</Placemark>
<Placemark>
<name>
            </name>
<styleUrl>#icon</styleUrl>
<Point>
<coordinates>
1.3333,20.4556
</coordinates>
</Point>
</Placemark>
<Placemark>
<name>
            </name>
<styleUrl>#icon</styleUrl>
<Point>
<coordinates>
1.3333,19.9
</coordinates>
</Point>
</Placemark>
<Placemark>
<name>
            </name>
<styleUrl>#icon</styleUrl>
<Point>
<coordinates>
1.3333,19.3444
</coordinates>
</Point>
</Placemark>
<Placemark>
<name>
            </name>
<styleUrl>#icon</styleUrl>
<Point>
<coordinates>
1.3333,18.7889
</coordinates>
</Point>
</Placemark>
<Placemark>
<name>
            </name>
<styleUrl>#icon</styleUrl>
<Point>
<coordinates>
1.3333,18.2333
</coordinates>
</Point>
</Placemark>
<Placemark>
<name>
            </name>
<styleUrl>#icon</styleUrl>
<Point>
<coordinates>
1.3333,17.6778
</coordinates>
</Point>
</Placemark>
<Placemark>
<name>
            </name>
<styleUrl>#icon</styleUrl>
<Point>
<coordinates>
1.3333,17.1222
</coordinates>
</Point>
</Placemark>
<Placemark>
<name>
            </name>
<styleUrl>#icon</styleUrl>
<Point>
<coordinates>
1.3333,16.5667
</coordinates>
</Point>
</Placemark>
<Placemark>
<name>
            </name>
<styleUrl>#icon</styleUrl>
<Point>
<coordinates>
1.3333,16.0111
</coordinates>
</Point>
</Placemark>
<Placemark>
<name>
            </name>
<styleUrl>#icon</styleUrl>
<Point>
<coordinates>
1.3333,15.4556
</coordinates>
</Point>
</Placemark>
<Placemark>
<name>
            </name>
<styleUrl>#icon</styleUrl>
<Point>
<coordinates>
1.3333,14.9
</coordinates>
</Point>
</Placemark>
<Placemark>
<name>
            </name>
<styleUrl>#icon</styleUrl>
<Point>
<coordinates>
1.3333,14.3444
</coordinates>
</Point>
</Placemark>
<Placemark>
<name>
            </name>
<styleUrl>#icon</styleUrl>
<Point>
<coordinates>
1.3333,13.7889
</coordinates>
</Point>
</Placemark>
<Placemark>
<name>
            </name>
<styleUrl>#icon</styleUrl>
<Point>
<coordinates>
1.3333,13.2333
</coordinates>
</Point>
</Placemark>
<Placemark>
<name>
            </name>
<styleUrl>#icon</styleUrl>
<Point>
<coordinates>
1.3333,12.6778
</coordinates>
</Point>
</Placemark>
<Placemark>
<name>
            </name>
<styleUrl>#icon</styleUrl>
<Point>
<coordinates>
2.1667,36.0111
</coordinates>
</Point>
</Placemark>
<Placemark>
<name>
            </name>
<styleUrl>#icon</styleUrl>
<Point>
<coordinates>
2.1667,35.4556
</coordinates>
</Point>
</Placemark>
<Placemark>
<name>
    T (local)        </name>
<styleUrl>#icon</styleUrl>
<Point>
<coordinates>
2.1667,34.9
</coordinates>
</Point>
</Placemark>
<Placemark>
<name>
            </name>
<styleUrl>#icon</styleUrl>
<Point>
<coordinates>
2.1667,34.3444
</coordinates>
</Point>
</Placemark>
<Placemark>
<name>
            </name>
<styleUrl>#icon</styleUrl>
<Point>
<coordinates>
2.1667,33.7889
</coordinates>
</Point>
</Placemark>
<Placemark>
<name>
    T (local)        </name>
<styleUrl>#icon</styleUrl>
<Point>
<coordinates>
2.1667,33.2333
</coordinates>
</Point>
</Placemark>
<Placemark>
<name>
    T (sparse)        </name>
<styleUrl>#icon</styleUrl>
<Point>
<coordinates>
2.1667,32.6778
</coordinates>
</Point>
</Placemark>
<Placemark>
<name>
B (sparse)    T (partial)        S (sparse)</name>
<styleUrl>#icon</styleUrl>
<Point>
<coordinates>
2.1667,32.1222
</coordinates>
</Point>
</Placemark>
<Placemark>
<name>
    T (full)        S (sparse)</name>
<styleUrl>#icon</styleUrl>
<Point>
<coordinates>
2.1667,31.5667
</coordinates>
</Point>
</Placemark>
<Placemark>
<name>
    T (full)        S (partial)</name>
<styleUrl>#icon</styleUrl>
<Point>
<coordinates>
2.1667,31.0111
</coordinates>
</Point>
</Placemark>
<Placemark>
<name>
    T (partial)        S (partial)</name>
<styleUrl>#icon</styleUrl>
<Point>
<coordinates>
2.1667,30.4556
</coordinates>
</Point>
</Placemark>
<Placemark>
<name>
B (local)    T (sparse)        </name>
<styleUrl>#icon</styleUrl>
<Point>
<coordinates>
2.1667,29.9
</coordinates>
</Point>
</Placemark>
<Placemark>
<name>
            </name>
<styleUrl>#icon</styleUrl>
<Point>
<coordinates>
2.1667,29.3444
</coordinates>
</Point>
</Placemark>
<Placemark>
<name>
            </name>
<styleUrl>#icon</styleUrl>
<Point>
<coordinates>
2.1667,28.7889
</coordinates>
</Point>
</Placemark>
<Placemark>
<name>
    T (local)        </name>
<styleUrl>#icon</styleUrl>
<Point>
<coordinates>
2.1667,28.2333
</coordinates>
</Point>
</Placemark>
<Placemark>
<name>
B (local)    T (sparse)    L (local)    </name>
<styleUrl>#icon</styleUrl>
<Point>
<coordinates>
2.1667,27.6778
</coordinates>
</Point>
</Placemark>
<Placemark>
<name>
B (local)    T (local)    L (local)    </name>
<styleUrl>#icon</styleUrl>
<Point>
<coordinates>
2.1667,27.1222
</coordinates>
</Point>
</Placemark>
<Placemark>
<name>
B (local)            </name>
<styleUrl>#icon</styleUrl>
<Point>
<coordinates>
2.1667,26.5667
</coordinates>
</Point>
</Placemark>
<Placemark>
<name>
            </name>
<styleUrl>#icon</styleUrl>
<Point>
<coordinates>
2.1667,26.0111
</coordinates>
</Point>
</Placemark>
<Placemark>
<name>
    T (sparse)        S (sparse)</name>
<styleUrl>#icon</styleUrl>
<Point>
<coordinates>
2.1667,25.4556
</coordinates>
</Point>
</Placemark>
<Placemark>
<name>
    T (sparse)        S (sparse)</name>
<styleUrl>#icon</styleUrl>
<Point>
<coordinates>
2.1667,24.9
</coordinates>
</Point>
</Placemark>
<Placemark>
<name>
    T (sparse)        S (local)</name>
<styleUrl>#icon</styleUrl>
<Point>
<coordinates>
2.1667,24.3444
</coordinates>
</Point>
</Placemark>
<Placemark>
<name>
    T (sparse)    L (local)    S (sparse)</name>
<styleUrl>#icon</styleUrl>
<Point>
<coordinates>
2.1667,23.7889
</coordinates>
</Point>
</Placemark>
<Placemark>
<name>
        L (local)    </name>
<styleUrl>#icon</styleUrl>
<Point>
<coordinates>
2.1667,23.2333
</coordinates>
</Point>
</Placemark>
<Placemark>
<name>
        L (sparse)    </name>
<styleUrl>#icon</styleUrl>
<Point>
<coordinates>
2.1667,22.6778
</coordinates>
</Point>
</Placemark>
<Placemark>
<name>
    T (sparse)    L (sparse)    </name>
<styleUrl>#icon</styleUrl>
<Point>
<coordinates>
2.1667,22.1222
</coordinates>
</Point>
</Placemark>
<Placemark>
<name>
    T (local)    L (local)    </name>
<styleUrl>#icon</styleUrl>
<Point>
<coordinates>
2.1667,21.5667
</coordinates>
</Point>
</Placemark>
<Placemark>
<name>
            </name>
<styleUrl>#icon</styleUrl>
<Point>
<coordinates>
2.1667,21.0111
</coordinates>
</Point>
</Placemark>
<Placemark>
<name>
            </name>
<styleUrl>#icon</styleUrl>
<Point>
<coordinates>
2.1667,20.4556
</coordinates>
</Point>
</Placemark>
<Placemark>
<name>
            </name>
<styleUrl>#icon</styleUrl>
<Point>
<coordinates>
2.1667,19.9
</coordinates>
</Point>
</Placemark>
<Placemark>
<name>
        L (local)    </name>
<styleUrl>#icon</styleUrl>
<Point>
<coordinates>
2.1667,19.3444
</coordinates>
</Point>
</Placemark>
<Placemark>
<name>
            </name>
<styleUrl>#icon</styleUrl>
<Point>
<coordinates>
2.1667,18.7889
</coordinates>
</Point>
</Placemark>
<Placemark>
<name>
            </name>
<styleUrl>#icon</styleUrl>
<Point>
<coordinates>
2.1667,18.2333
</coordinates>
</Point>
</Placemark>
<Placemark>
<name>
    T (local)        </name>
<styleUrl>#icon</styleUrl>
<Point>
<coordinates>
2.1667,17.6778
</coordinates>
</Point>
</Placemark>
<Placemark>
<name>
    T (local)        </name>
<styleUrl>#icon</styleUrl>
<Point>
<coordinates>
2.1667,17.1222
</coordinates>
</Point>
</Placemark>
<Placemark>
<name>
            </name>
<styleUrl>#icon</styleUrl>
<Point>
<coordinates>
2.1667,16.5667
</coordinates>
</Point>
</Placemark>
<Placemark>
<name>
            </name>
<styleUrl>#icon</styleUrl>
<Point>
<coordinates>
2.1667,16.0111
</coordinates>
</Point>
</Placemark>
<Placemark>
<name>
            </name>
<styleUrl>#icon</styleUrl>
<Point>
<coordinates>
2.1667,15.4556
</coordinates>
</Point>
</Placemark>
<Placemark>
<name>
            </name>
<styleUrl>#icon</styleUrl>
<Point>
<coordinates>
2.1667,14.9
</coordinates>
</Point>
</Placemark>
<Placemark>
<name>
            </name>
<styleUrl>#icon</styleUrl>
<Point>
<coordinates>
2.1667,14.3444
</coordinates>
</Point>
</Placemark>
<Placemark>
<name>
            </name>
<styleUrl>#icon</styleUrl>
<Point>
<coordinates>
2.1667,13.7889
</coordinates>
</Point>
</Placemark>
<Placemark>
<name>
            </name>
<styleUrl>#icon</styleUrl>
<Point>
<coordinates>
2.1667,13.2333
</coordinates>
</Point>
</Placemark>
<Placemark>
<name>
            </name>
<styleUrl>#icon</styleUrl>
<Point>
<coordinates>
2.1667,12.6778
</coordinates>
</Point>
</Placemark>
<Placemark>
<name>
            </name>
<styleUrl>#icon</styleUrl>
<Point>
<coordinates>
3,39.9
</coordinates>
</Point>
</Placemark>
<Placemark>
<name>
            </name>
<styleUrl>#icon</styleUrl>
<Point>
<coordinates>
3,36.0111
</coordinates>
</Point>
</Placemark>
<Placemark>
<name>
    T (local)        </name>
<styleUrl>#icon</styleUrl>
<Point>
<coordinates>
3,35.4556
</coordinates>
</Point>
</Placemark>
<Placemark>
<name>
    T (sparse)        </name>
<styleUrl>#icon</styleUrl>
<Point>
<coordinates>
3,34.9
</coordinates>
</Point>
</Placemark>
<Placemark>
<name>
    T (local)        </name>
<styleUrl>#icon</styleUrl>
<Point>
<coordinates>
3,34.3444
</coordinates>
</Point>
</Placemark>
<Placemark>
<name>
B (local)    T (local)        </name>
<styleUrl>#icon</styleUrl>
<Point>
<coordinates>
3,33.7889
</coordinates>
</Point>
</Placemark>
<Placemark>
<name>
            </name>
<styleUrl>#icon</styleUrl>
<Point>
<coordinates>
3,33.2333
</coordinates>
</Point>
</Placemark>
<Placemark>
<name>
B (local)    T (sparse)        </name>
<styleUrl>#icon</styleUrl>
<Point>
<coordinates>
3,32.6778
</coordinates>
</Point>
</Placemark>
<Placemark>
<name>
    T (partial)    L (local)    S (sparse)</name>
<styleUrl>#icon</styleUrl>
<Point>
<coordinates>
3,32.1222
</coordinates>
</Point>
</Placemark>
<Placemark>
<name>
    T (partial)    L (local)    S (partial)</name>
<styleUrl>#icon</styleUrl>
<Point>
<coordinates>
3,31.5667
</coordinates>
</Point>
</Placemark>
<Placemark>
<name>
B (local)    T (partial)        S (sparse)</name>
<styleUrl>#icon</styleUrl>
<Point>
<coordinates>
3,31.0111
</coordinates>
</Point>
</Placemark>
<Placemark>
<name>
B (sparse)    T (sparse)        S (sparse)</name>
<styleUrl>#icon</styleUrl>
<Point>
<coordinates>
3,30.4556
</coordinates>
</Point>
</Placemark>
<Placemark>
<name>
B (local)    T (sparse)        S (local)</name>
<styleUrl>#icon</styleUrl>
<Point>
<coordinates>
3,29.9
</coordinates>
</Point>
</Placemark>
<Placemark>
<name>
            </name>
<styleUrl>#icon</styleUrl>
<Point>
<coordinates>
3,29.3444
</coordinates>
</Point>
</Placemark>
<Placemark>
<name>
            </name>
<styleUrl>#icon</styleUrl>
<Point>
<coordinates>
3,28.7889
</coordinates>
</Point>
</Placemark>
<Placemark>
<name>
            </name>
<styleUrl>#icon</styleUrl>
<Point>
<coordinates>
3,28.2333
</coordinates>
</Point>
</Placemark>
<Placemark>
<name>
B (local)            </name>
<styleUrl>#icon</styleUrl>
<Point>
<coordinates>
3,27.6778
</coordinates>
</Point>
</Placemark>
<Placemark>
<name>
B (local)            </name>
<styleUrl>#icon</styleUrl>
<Point>
<coordinates>
3,27.1222
</coordinates>
</Point>
</Placemark>
<Placemark>
<name>
B (local)    T (local)        </name>
<styleUrl>#icon</styleUrl>
<Point>
<coordinates>
3,26.5667
</coordinates>
</Point>
</Placemark>
<Placemark>
<name>
B (local)    T (sparse)        S (sparse)</name>
<styleUrl>#icon</styleUrl>
<Point>
<coordinates>
3,26.0111
</coordinates>
</Point>
</Placemark>
<Placemark>
<name>
    T (sparse)        S (sparse)</name>
<styleUrl>#icon</styleUrl>
<Point>
<coordinates>
3,25.4556
</coordinates>
</Point>
</Placemark>
<Placemark>
<name>
    T (local)        S (local)</name>
<styleUrl>#icon</styleUrl>
<Point>
<coordinates>
3,24.9
</coordinates>
</Point>
</Placemark>
<Placemark>
<name>
    T (sparse)    L (local)    S (sparse)</name>
<styleUrl>#icon</styleUrl>
<Point>
<coordinates>
3,24.3444
</coordinates>
</Point>
</Placemark>
<Placemark>
<name>
    T (sparse)    L (local)    S (sparse)</name>
<styleUrl>#icon</styleUrl>
<Point>
<coordinates>
3,23.7889
</coordinates>
</Point>
</Placemark>
<Placemark>
<name>
    T (local)    L (sparse)    </name>
<styleUrl>#icon</styleUrl>
<Point>
<coordinates>
3,23.2333
</coordinates>
</Point>
</Placemark>
<Placemark>
<name>
    T (local)    L (sparse)    </name>
<styleUrl>#icon</styleUrl>
<Point>
<coordinates>
3,22.6778
</coordinates>
</Point>
</Placemark>
<Placemark>
<name>
    T (local)    L (local)    S (local)</name>
<styleUrl>#icon</styleUrl>
<Point>
<coordinates>
3,22.1222
</coordinates>
</Point>
</Placemark>
<Placemark>
<name>
    T (sparse)    L (sparse)    </name>
<styleUrl>#icon</styleUrl>
<Point>
<coordinates>
3,21.5667
</coordinates>
</Point>
</Placemark>
<Placemark>
<name>
B (local)    T (local)        </name>
<styleUrl>#icon</styleUrl>
<Point>
<coordinates>
3,21.0111
</coordinates>
</Point>
</Placemark>
<Placemark>
<name>
            </name>
<styleUrl>#icon</styleUrl>
<Point>
<coordinates>
3,20.4556
</coordinates>
</Point>
</Placemark>
<Placemark>
<name>
    T (sparse)    L (sparse)    </name>
<styleUrl>#icon</styleUrl>
<Point>
<coordinates>
3,19.9
</coordinates>
</Point>
</Placemark>
<Placemark>
<name>
B (local)    T (sparse)    L (sparse)    </name>
<styleUrl>#icon</styleUrl>
<Point>
<coordinates>
3,19.3444
</coordinates>
</Point>
</Placemark>
<Placemark>
<name>
B (sparse)    T (sparse)    L (sparse)    </name>
<styleUrl>#icon</styleUrl>
<Point>
<coordinates>
3,18.7889
</coordinates>
</Point>
</Placemark>
<Placemark>
<name>
    T (local)    L (local)    </name>
<styleUrl>#icon</styleUrl>
<Point>
<coordinates>
3,18.2333
</coordinates>
</Point>
</Placemark>
<Placemark>
<name>
    T (local)        </name>
<styleUrl>#icon</styleUrl>
<Point>
<coordinates>
3,17.6778
</coordinates>
</Point>
</Placemark>
<Placemark>
<name>
            </name>
<styleUrl>#icon</styleUrl>
<Point>
<coordinates>
3,17.1222
</coordinates>
</Point>
</Placemark>
<Placemark>
<name>
            </name>
<styleUrl>#icon</styleUrl>
<Point>
<coordinates>
3,16.5667
</coordinates>
</Point>
</Placemark>
<Placemark>
<name>
            </name>
<styleUrl>#icon</styleUrl>
<Point>
<coordinates>
3,16.0111
</coordinates>
</Point>
</Placemark>
<Placemark>
<name>
            </name>
<styleUrl>#icon</styleUrl>
<Point>
<coordinates>
3,15.4556
</coordinates>
</Point>
</Placemark>
<Placemark>
<name>
            </name>
<styleUrl>#icon</styleUrl>
<Point>
<coordinates>
3,14.9
</coordinates>
</Point>
</Placemark>
<Placemark>
<name>
            </name>
<styleUrl>#icon</styleUrl>
<Point>
<coordinates>
3,14.3444
</coordinates>
</Point>
</Placemark>
<Placemark>
<name>
            </name>
<styleUrl>#icon</styleUrl>
<Point>
<coordinates>
3,13.7889
</coordinates>
</Point>
</Placemark>
<Placemark>
<name>
            </name>
<styleUrl>#icon</styleUrl>
<Point>
<coordinates>
3,13.2333
</coordinates>
</Point>
</Placemark>
<Placemark>
<name>
            </name>
<styleUrl>#icon</styleUrl>
<Point>
<coordinates>
3,12.6778
</coordinates>
</Point>
</Placemark>
<Placemark>
<name>
            </name>
<styleUrl>#icon</styleUrl>
<Point>
<coordinates>
3,12.1222
</coordinates>
</Point>
</Placemark>
<Placemark>
<name>
            </name>
<styleUrl>#icon</styleUrl>
<Point>
<coordinates>
3.8333,36.0111
</coordinates>
</Point>
</Placemark>
<Placemark>
<name>
    T (sparse)        </name>
<styleUrl>#icon</styleUrl>
<Point>
<coordinates>
3.8333,35.4556
</coordinates>
</Point>
</Placemark>
<Placemark>
<name>
            </name>
<styleUrl>#icon</styleUrl>
<Point>
<coordinates>
3.8333,34.9
</coordinates>
</Point>
</Placemark>
<Placemark>
<name>
            </name>
<styleUrl>#icon</styleUrl>
<Point>
<coordinates>
3.8333,34.3444
</coordinates>
</Point>
</Placemark>
<Placemark>
<name>
B (local)    T (local)        </name>
<styleUrl>#icon</styleUrl>
<Point>
<coordinates>
3.8333,33.7889
</coordinates>
</Point>
</Placemark>
<Placemark>
<name>
            </name>
<styleUrl>#icon</styleUrl>
<Point>
<coordinates>
3.8333,33.2333
</coordinates>
</Point>
</Placemark>
<Placemark>
<name>
B (local)    T (local)        </name>
<styleUrl>#icon</styleUrl>
<Point>
<coordinates>
3.8333,32.6778
</coordinates>
</Point>
</Placemark>
<Placemark>
<name>
B (sparse)    T (sparse)        </name>
<styleUrl>#icon</styleUrl>
<Point>
<coordinates>
3.8333,32.1222
</coordinates>
</Point>
</Placemark>
<Placemark>
<name>
B (sparse)    T (sparse)        </name>
<styleUrl>#icon</styleUrl>
<Point>
<coordinates>
3.8333,31.5667
</coordinates>
</Point>
</Placemark>
<Placemark>
<name>
B (sparse)    T (sparse)        </name>
<styleUrl>#icon</styleUrl>
<Point>
<coordinates>
3.8333,31.0111
</coordinates>
</Point>
</Placemark>
<Placemark>
<name>
B (local)    T (local)        </name>
<styleUrl>#icon</styleUrl>
<Point>
<coordinates>
3.8333,30.4556
</coordinates>
</Point>
</Placemark>
<Placemark>
<name>
B (sparse)    T (sparse)        S (local)</name>
<styleUrl>#icon</styleUrl>
<Point>
<coordinates>
3.8333,29.9
</coordinates>
</Point>
</Placemark>
<Placemark>
<name>
B (local)    T (sparse)        S (sparse)</name>
<styleUrl>#icon</styleUrl>
<Point>
<coordinates>
3.8333,29.3444
</coordinates>
</Point>
</Placemark>
<Placemark>
<name>
    T (local)        S (local)</name>
<styleUrl>#icon</styleUrl>
<Point>
<coordinates>
3.8333,28.7889
</coordinates>
</Point>
</Placemark>
<Placemark>
<name>
            </name>
<styleUrl>#icon</styleUrl>
<Point>
<coordinates>
3.8333,28.2333
</coordinates>
</Point>
</Placemark>
<Placemark>
<name>
            </name>
<styleUrl>#icon</styleUrl>
<Point>
<coordinates>
3.8333,27.6778
</coordinates>
</Point>
</Placemark>
<Placemark>
<name>
            </name>
<styleUrl>#icon</styleUrl>
<Point>
<coordinates>
3.8333,27.1222
</coordinates>
</Point>
</Placemark>
<Placemark>
<name>
B (sparse)    T (sparse)        </name>
<styleUrl>#icon</styleUrl>
<Point>
<coordinates>
3.8333,26.5667
</coordinates>
</Point>
</Placemark>
<Placemark>
<name>
B (local)    T (local)        S (local)</name>
<styleUrl>#icon</styleUrl>
<Point>
<coordinates>
3.8333,26.0111
</coordinates>
</Point>
</Placemark>
<Placemark>
<name>
    T (local)        S (local)</name>
<styleUrl>#icon</styleUrl>
<Point>
<coordinates>
3.8333,25.4556
</coordinates>
</Point>
</Placemark>
<Placemark>
<name>
            </name>
<styleUrl>#icon</styleUrl>
<Point>
<coordinates>
3.8333,24.9
</coordinates>
</Point>
</Placemark>
<Placemark>
<name>
    T (local)        S (local)</name>
<styleUrl>#icon</styleUrl>
<Point>
<coordinates>
3.8333,24.3444
</coordinates>
</Point>
</Placemark>
<Placemark>
<name>
    T (sparse)        S (sparse)</name>
<styleUrl>#icon</styleUrl>
<Point>
<coordinates>
3.8333,23.7889
</coordinates>
</Point>
</Placemark>
<Placemark>
<name>
            </name>
<styleUrl>#icon</styleUrl>
<Point>
<coordinates>
3.8333,23.2333
</coordinates>
</Point>
</Placemark>
<Placemark>
<name>
            </name>
<styleUrl>#icon</styleUrl>
<Point>
<coordinates>
3.8333,22.6778
</coordinates>
</Point>
</Placemark>
<Placemark>
<name>
    T (local)        </name>
<styleUrl>#icon</styleUrl>
<Point>
<coordinates>
3.8333,22.1222
</coordinates>
</Point>
</Placemark>
<Placemark>
<name>
    T (local)        </name>
<styleUrl>#icon</styleUrl>
<Point>
<coordinates>
3.8333,21.5667
</coordinates>
</Point>
</Placemark>
<Placemark>
<name>
    T (sparse)    L (sparse)    </name>
<styleUrl>#icon</styleUrl>
<Point>
<coordinates>
3.8333,21.0111
</coordinates>
</Point>
</Placemark>
<Placemark>
<name>
    T (sparse)    L (sparse)    </name>
<styleUrl>#icon</styleUrl>
<Point>
<coordinates>
3.8333,20.4556
</coordinates>
</Point>
</Placemark>
<Placemark>
<name>
B (sparse)    T (sparse)    L (sparse)    </name>
<styleUrl>#icon</styleUrl>
<Point>
<coordinates>
3.8333,19.9
</coordinates>
</Point>
</Placemark>
<Placemark>
<name>
B (sparse)    T (sparse)    L (sparse)    </name>
<styleUrl>#icon</styleUrl>
<Point>
<coordinates>
3.8333,19.3444
</coordinates>
</Point>
</Placemark>
<Placemark>
<name>
B (sparse)        L (partial)    </name>
<styleUrl>#icon</styleUrl>
<Point>
<coordinates>
3.8333,18.7889
</coordinates>
</Point>
</Placemark>
<Placemark>
<name>
        L (local)    </name>
<styleUrl>#icon</styleUrl>
<Point>
<coordinates>
3.8333,18.2333
</coordinates>
</Point>
</Placemark>
<Placemark>
<name>
        L (local)    </name>
<styleUrl>#icon</styleUrl>
<Point>
<coordinates>
3.8333,17.6778
</coordinates>
</Point>
</Placemark>
<Placemark>
<name>
        L (local)    </name>
<styleUrl>#icon</styleUrl>
<Point>
<coordinates>
3.8333,17.1222
</coordinates>
</Point>
</Placemark>
<Placemark>
<name>
            </name>
<styleUrl>#icon</styleUrl>
<Point>
<coordinates>
3.8333,16.5667
</coordinates>
</Point>
</Placemark>
<Placemark>
<name>
            </name>
<styleUrl>#icon</styleUrl>
<Point>
<coordinates>
3.8333,16.0111
</coordinates>
</Point>
</Placemark>
<Placemark>
<name>
            </name>
<styleUrl>#icon</styleUrl>
<Point>
<coordinates>
3.8333,15.4556
</coordinates>
</Point>
</Placemark>
<Placemark>
<name>
            </name>
<styleUrl>#icon</styleUrl>
<Point>
<coordinates>
3.8333,14.9
</coordinates>
</Point>
</Placemark>
<Placemark>
<name>
            </name>
<styleUrl>#icon</styleUrl>
<Point>
<coordinates>
3.8333,14.3444
</coordinates>
</Point>
</Placemark>
<Placemark>
<name>
            </name>
<styleUrl>#icon</styleUrl>
<Point>
<coordinates>
3.8333,13.7889
</coordinates>
</Point>
</Placemark>
<Placemark>
<name>
            </name>
<styleUrl>#icon</styleUrl>
<Point>
<coordinates>
3.8333,13.2333
</coordinates>
</Point>
</Placemark>
<Placemark>
<name>
            </name>
<styleUrl>#icon</styleUrl>
<Point>
<coordinates>
3.8333,12.6778
</coordinates>
</Point>
</Placemark>
<Placemark>
<name>
            </name>
<styleUrl>#icon</styleUrl>
<Point>
<coordinates>
3.8333,12.1222
</coordinates>
</Point>
</Placemark>
<Placemark>
<name>
            </name>
<styleUrl>#icon</styleUrl>
<Point>
<coordinates>
4.6667,36.5667
</coordinates>
</Point>
</Placemark>
<Placemark>
<name>
            </name>
<styleUrl>#icon</styleUrl>
<Point>
<coordinates>
4.6667,36.0111
</coordinates>
</Point>
</Placemark>
<Placemark>
<name>
            </name>
<styleUrl>#icon</styleUrl>
<Point>
<coordinates>
4.6667,35.4556
</coordinates>
</Point>
</Placemark>
<Placemark>
<name>
            </name>
<styleUrl>#icon</styleUrl>
<Point>
<coordinates>
4.6667,34.9
</coordinates>
</Point>
</Placemark>
<Placemark>
<name>
            </name>
<styleUrl>#icon</styleUrl>
<Point>
<coordinates>
4.6667,34.3444
</coordinates>
</Point>
</Placemark>
<Placemark>
<name>
            </name>
<styleUrl>#icon</styleUrl>
<Point>
<coordinates>
4.6667,33.7889
</coordinates>
</Point>
</Placemark>
<Placemark>
<name>
            </name>
<styleUrl>#icon</styleUrl>
<Point>
<coordinates>
4.6667,33.2333
</coordinates>
</Point>
</Placemark>
<Placemark>
<name>
B (local)            </name>
<styleUrl>#icon</styleUrl>
<Point>
<coordinates>
4.6667,32.6778
</coordinates>
</Point>
</Placemark>
<Placemark>
<name>
B (local)            </name>
<styleUrl>#icon</styleUrl>
<Point>
<coordinates>
4.6667,32.1222
</coordinates>
</Point>
</Placemark>
<Placemark>
<name>
B (local)    T (local)        S (local)</name>
<styleUrl>#icon</styleUrl>
<Point>
<coordinates>
4.6667,31.5667
</coordinates>
</Point>
</Placemark>
<Placemark>
<name>
B (sparse)    T (sparse)        S (local)</name>
<styleUrl>#icon</styleUrl>
<Point>
<coordinates>
4.6667,31.0111
</coordinates>
</Point>
</Placemark>
<Placemark>
<name>
B (sparse)    T (partial)        S (sparse)</name>
<styleUrl>#icon</styleUrl>
<Point>
<coordinates>
4.6667,30.4556
</coordinates>
</Point>
</Placemark>
<Placemark>
<name>
B (local)    T (partial)        S (partial)</name>
<styleUrl>#icon</styleUrl>
<Point>
<coordinates>
4.6667,29.9
</coordinates>
</Point>
</Placemark>
<Placemark>
<name>
    T (partial)        S (partial)</name>
<styleUrl>#icon</styleUrl>
<Point>
<coordinates>
4.6667,29.3444
</coordinates>
</Point>
</Placemark>
<Placemark>
<name>
    T (sparse)        S (sparse)</name>
<styleUrl>#icon</styleUrl>
<Point>
<coordinates>
4.6667,28.7889
</coordinates>
</Point>
</Placemark>
<Placemark>
<name>
    T (local)        S (local)</name>
<styleUrl>#icon</styleUrl>
<Point>
<coordinates>
4.6667,28.2333
</coordinates>
</Point>
</Placemark>
<Placemark>
<name>
B (local)    T (local)        </name>
<styleUrl>#icon</styleUrl>
<Point>
<coordinates>
4.6667,27.6778
</coordinates>
</Point>
</Placemark>
<Placemark>
<name>
B (local)    T (local)        </name>
<styleUrl>#icon</styleUrl>
<Point>
<coordinates>
4.6667,27.1222
</coordinates>
</Point>
</Placemark>
<Placemark>
<name>
B (sparse)    T (sparse)        S (sparse)</name>
<styleUrl>#icon</styleUrl>
<Point>
<coordinates>
4.6667,26.5667
</coordinates>
</Point>
</Placemark>
<Placemark>
<name>
    T (local)        S (local)</name>
<styleUrl>#icon</styleUrl>
<Point>
<coordinates>
4.6667,26.0111
</coordinates>
</Point>
</Placemark>
<Placemark>
<name>
            </name>
<styleUrl>#icon</styleUrl>
<Point>
<coordinates>
4.6667,25.4556
</coordinates>
</Point>
</Placemark>
<Placemark>
<name>
    T (local)        </name>
<styleUrl>#icon</styleUrl>
<Point>
<coordinates>
4.6667,24.9
</coordinates>
</Point>
</Placemark>
<Placemark>
<name>
    T (local)        S (local)</name>
<styleUrl>#icon</styleUrl>
<Point>
<coordinates>
4.6667,24.3444
</coordinates>
</Point>
</Placemark>
<Placemark>
<name>
    T (local)        S (local)</name>
<styleUrl>#icon</styleUrl>
<Point>
<coordinates>
4.6667,23.7889
</coordinates>
</Point>
</Placemark>
<Placemark>
<name>
    T (local)        </name>
<styleUrl>#icon</styleUrl>
<Point>
<coordinates>
4.6667,23.2333
</coordinates>
</Point>
</Placemark>
<Placemark>
<name>
            </name>
<styleUrl>#icon</styleUrl>
<Point>
<coordinates>
4.6667,22.6778
</coordinates>
</Point>
</Placemark>
<Placemark>
<name>
            </name>
<styleUrl>#icon</styleUrl>
<Point>
<coordinates>
4.6667,22.1222
</coordinates>
</Point>
</Placemark>
<Placemark>
<name>
            </name>
<styleUrl>#icon</styleUrl>
<Point>
<coordinates>
4.6667,21.5667
</coordinates>
</Point>
</Placemark>
<Placemark>
<name>
        L (sparse)    </name>
<styleUrl>#icon</styleUrl>
<Point>
<coordinates>
4.6667,21.0111
</coordinates>
</Point>
</Placemark>
<Placemark>
<name>
    T (local)    L (sparse)    </name>
<styleUrl>#icon</styleUrl>
<Point>
<coordinates>
4.6667,20.4556
</coordinates>
</Point>
</Placemark>
<Placemark>
<name>
    T (local)    L (local)    </name>
<styleUrl>#icon</styleUrl>
<Point>
<coordinates>
4.6667,19.9
</coordinates>
</Point>
</Placemark>
<Placemark>
<name>
    T (partial)    L (partial)    </name>
<styleUrl>#icon</styleUrl>
<Point>
<coordinates>
4.6667,19.3444
</coordinates>
</Point>
</Placemark>
<Placemark>
<name>
    T (partial)    L (partial)    </name>
<styleUrl>#icon</styleUrl>
<Point>
<coordinates>
4.6667,18.7889
</coordinates>
</Point>
</Placemark>
<Placemark>
<name>
            </name>
<styleUrl>#icon</styleUrl>
<Point>
<coordinates>
4.6667,18.2333
</coordinates>
</Point>
</Placemark>
<Placemark>
<name>
    T (sparse)        </name>
<styleUrl>#icon</styleUrl>
<Point>
<coordinates>
4.6667,17.6778
</coordinates>
</Point>
</Placemark>
<Placemark>
<name>
            </name>
<styleUrl>#icon</styleUrl>
<Point>
<coordinates>
4.6667,17.1222
</coordinates>
</Point>
</Placemark>
<Placemark>
<name>
            </name>
<styleUrl>#icon</styleUrl>
<Point>
<coordinates>
4.6667,16.5667
</coordinates>
</Point>
</Placemark>
<Placemark>
<name>
            </name>
<styleUrl>#icon</styleUrl>
<Point>
<coordinates>
4.6667,16.0111
</coordinates>
</Point>
</Placemark>
<Placemark>
<name>
            </name>
<styleUrl>#icon</styleUrl>
<Point>
<coordinates>
4.6667,15.4556
</coordinates>
</Point>
</Placemark>
<Placemark>
<name>
            </name>
<styleUrl>#icon</styleUrl>
<Point>
<coordinates>
4.6667,14.9
</coordinates>
</Point>
</Placemark>
<Placemark>
<name>
            </name>
<styleUrl>#icon</styleUrl>
<Point>
<coordinates>
4.6667,14.3444
</coordinates>
</Point>
</Placemark>
<Placemark>
<name>
            </name>
<styleUrl>#icon</styleUrl>
<Point>
<coordinates>
4.6667,13.7889
</coordinates>
</Point>
</Placemark>
<Placemark>
<name>
            </name>
<styleUrl>#icon</styleUrl>
<Point>
<coordinates>
4.6667,13.2333
</coordinates>
</Point>
</Placemark>
<Placemark>
<name>
            </name>
<styleUrl>#icon</styleUrl>
<Point>
<coordinates>
4.6667,12.6778
</coordinates>
</Point>
</Placemark>
<Placemark>
<name>
            </name>
<styleUrl>#icon</styleUrl>
<Point>
<coordinates>
5.5,36.5667
</coordinates>
</Point>
</Placemark>
<Placemark>
<name>
            </name>
<styleUrl>#icon</styleUrl>
<Point>
<coordinates>
5.5,36.0111
</coordinates>
</Point>
</Placemark>
<Placemark>
<name>
    T (local)        </name>
<styleUrl>#icon</styleUrl>
<Point>
<coordinates>
5.5,35.4556
</coordinates>
</Point>
</Placemark>
<Placemark>
<name>
    T (local)        </name>
<styleUrl>#icon</styleUrl>
<Point>
<coordinates>
5.5,34.9
</coordinates>
</Point>
</Placemark>
<Placemark>
<name>
            </name>
<styleUrl>#icon</styleUrl>
<Point>
<coordinates>
5.5,34.3444
</coordinates>
</Point>
</Placemark>
<Placemark>
<name>
            </name>
<styleUrl>#icon</styleUrl>
<Point>
<coordinates>
5.5,33.7889
</coordinates>
</Point>
</Placemark>
<Placemark>
<name>
B (sparse)    T (sparse)    L (sparse)    </name>
<styleUrl>#icon</styleUrl>
<Point>
<coordinates>
5.5,33.2333
</coordinates>
</Point>
</Placemark>
<Placemark>
<name>
B (sparse)    T (partial)    L (sparse)    </name>
<styleUrl>#icon</styleUrl>
<Point>
<coordinates>
5.5,32.6778
</coordinates>
</Point>
</Placemark>
<Placemark>
<name>
B (sparse)    T (partial)        S (local)</name>
<styleUrl>#icon</styleUrl>
<Point>
<coordinates>
5.5,32.1222
</coordinates>
</Point>
</Placemark>
<Placemark>
<name>
B (sparse)    T (sparse)        S (local)</name>
<styleUrl>#icon</styleUrl>
<Point>
<coordinates>
5.5,31.5667
</coordinates>
</Point>
</Placemark>
<Placemark>
<name>
B (sparse)    T (sparse)        S (local)</name>
<styleUrl>#icon</styleUrl>
<Point>
<coordinates>
5.5,31.0111
</coordinates>
</Point>
</Placemark>
<Placemark>
<name>
    T (partial)        S (partial)</name>
<styleUrl>#icon</styleUrl>
<Point>
<coordinates>
5.5,30.4556
</coordinates>
</Point>
</Placemark>
<Placemark>
<name>
    T (full)        S (full)</name>
<styleUrl>#icon</styleUrl>
<Point>
<coordinates>
5.5,29.9
</coordinates>
</Point>
</Placemark>
<Placemark>
<name>
    T (full)        S (full)</name>
<styleUrl>#icon</styleUrl>
<Point>
<coordinates>
5.5,29.3444
</coordinates>
</Point>
</Placemark>
<Placemark>
<name>
    T (partial)        S (partial)</name>
<styleUrl>#icon</styleUrl>
<Point>
<coordinates>
5.5,28.7889
</coordinates>
</Point>
</Placemark>
<Placemark>
<name>
            </name>
<styleUrl>#icon</styleUrl>
<Point>
<coordinates>
5.5,28.2333
</coordinates>
</Point>
</Placemark>
<Placemark>
<name>
    T (local)        </name>
<styleUrl>#icon</styleUrl>
<Point>
<coordinates>
5.5,27.6778
</coordinates>
</Point>
</Placemark>
<Placemark>
<name>
B (local)    T (sparse)        S (local)</name>
<styleUrl>#icon</styleUrl>
<Point>
<coordinates>
5.5,27.1222
</coordinates>
</Point>
</Placemark>
<Placemark>
<name>
    T (sparse)        S (sparse)</name>
<styleUrl>#icon</styleUrl>
<Point>
<coordinates>
5.5,26.5667
</coordinates>
</Point>
</Placemark>
<Placemark>
<name>
    T (sparse)        S (local)</name>
<styleUrl>#icon</styleUrl>
<Point>
<coordinates>
5.5,26.0111
</coordinates>
</Point>
</Placemark>
<Placemark>
<name>
    T (local)        </name>
<styleUrl>#icon</styleUrl>
<Point>
<coordinates>
5.5,25.4556
</coordinates>
</Point>
</Placemark>
<Placemark>
<name>
    T (local)        </name>
<styleUrl>#icon</styleUrl>
<Point>
<coordinates>
5.5,24.9
</coordinates>
</Point>
</Placemark>
<Placemark>
<name>
            </name>
<styleUrl>#icon</styleUrl>
<Point>
<coordinates>
5.5,24.3444
</coordinates>
</Point>
</Placemark>
<Placemark>
<name>
            </name>
<styleUrl>#icon</styleUrl>
<Point>
<coordinates>
5.5,23.7889
</coordinates>
</Point>
</Placemark>
<Placemark>
<name>
            </name>
<styleUrl>#icon</styleUrl>
<Point>
<coordinates>
5.5,23.2333
</coordinates>
</Point>
</Placemark>
<Placemark>
<name>
            </name>
<styleUrl>#icon</styleUrl>
<Point>
<coordinates>
5.5,22.6778
</coordinates>
</Point>
</Placemark>
<Placemark>
<name>
            </name>
<styleUrl>#icon</styleUrl>
<Point>
<coordinates>
5.5,22.1222
</coordinates>
</Point>
</Placemark>
<Placemark>
<name>
            </name>
<styleUrl>#icon</styleUrl>
<Point>
<coordinates>
5.5,21.5667
</coordinates>
</Point>
</Placemark>
<Placemark>
<name>
        L (local)    </name>
<styleUrl>#icon</styleUrl>
<Point>
<coordinates>
5.5,21.0111
</coordinates>
</Point>
</Placemark>
<Placemark>
<name>
B (sparse)        L (local)    </name>
<styleUrl>#icon</styleUrl>
<Point>
<coordinates>
5.5,20.4556
</coordinates>
</Point>
</Placemark>
<Placemark>
<name>
B (local)    T (local)    L (sparse)    </name>
<styleUrl>#icon</styleUrl>
<Point>
<coordinates>
5.5,19.9
</coordinates>
</Point>
</Placemark>
<Placemark>
<name>
    T (sparse)    L (local)    </name>
<styleUrl>#icon</styleUrl>
<Point>
<coordinates>
5.5,19.3444
</coordinates>
</Point>
</Placemark>
<Placemark>
<name>
    T (partial)        </name>
<styleUrl>#icon</styleUrl>
<Point>
<coordinates>
5.5,18.7889
</coordinates>
</Point>
</Placemark>
<Placemark>
<name>
    T (partial)        </name>
<styleUrl>#icon</styleUrl>
<Point>
<coordinates>
5.5,18.2333
</coordinates>
</Point>
</Placemark>
<Placemark>
<name>
    T (sparse)        </name>
<styleUrl>#icon</styleUrl>
<Point>
<coordinates>
5.5,17.6778
</coordinates>
</Point>
</Placemark>
<Placemark>
<name>
            </name>
<styleUrl>#icon</styleUrl>
<Point>
<coordinates>
5.5,17.1222
</coordinates>
</Point>
</Placemark>
<Placemark>
<name>
            </name>
<styleUrl>#icon</styleUrl>
<Point>
<coordinates>
5.5,16.5667
</coordinates>
</Point>
</Placemark>
<Placemark>
<name>
            </name>
<styleUrl>#icon</styleUrl>
<Point>
<coordinates>
5.5,16.0111
</coordinates>
</Point>
</Placemark>
<Placemark>
<name>
            </name>
<styleUrl>#icon</styleUrl>
<Point>
<coordinates>
5.5,15.4556
</coordinates>
</Point>
</Placemark>
<Placemark>
<name>
            </name>
<styleUrl>#icon</styleUrl>
<Point>
<coordinates>
5.5,14.9
</coordinates>
</Point>
</Placemark>
<Placemark>
<name>
            </name>
<styleUrl>#icon</styleUrl>
<Point>
<coordinates>
5.5,14.3444
</coordinates>
</Point>
</Placemark>
<Placemark>
<name>
            </name>
<styleUrl>#icon</styleUrl>
<Point>
<coordinates>
5.5,13.7889
</coordinates>
</Point>
</Placemark>
<Placemark>
<name>
            </name>
<styleUrl>#icon</styleUrl>
<Point>
<coordinates>
5.5,13.2333
</coordinates>
</Point>
</Placemark>
<Placemark>
<name>
            </name>
<styleUrl>#icon</styleUrl>
<Point>
<coordinates>
5.5,12.6778
</coordinates>
</Point>
</Placemark>
<Placemark>
<name>
            </name>
<styleUrl>#icon</styleUrl>
<Point>
<coordinates>
6.3333,36.5667
</coordinates>
</Point>
</Placemark>
<Placemark>
<name>
            </name>
<styleUrl>#icon</styleUrl>
<Point>
<coordinates>
6.3333,36.0111
</coordinates>
</Point>
</Placemark>
<Placemark>
<name>
            </name>
<styleUrl>#icon</styleUrl>
<Point>
<coordinates>
6.3333,35.4556
</coordinates>
</Point>
</Placemark>
<Placemark>
<name>
            </name>
<styleUrl>#icon</styleUrl>
<Point>
<coordinates>
6.3333,34.9
</coordinates>
</Point>
</Placemark>
<Placemark>
<name>
    T (sparse)        </name>
<styleUrl>#icon</styleUrl>
<Point>
<coordinates>
6.3333,34.3444
</coordinates>
</Point>
</Placemark>
<Placemark>
<name>
    T (partial)        </name>
<styleUrl>#icon</styleUrl>
<Point>
<coordinates>
6.3333,33.7889
</coordinates>
</Point>
</Placemark>
<Placemark>
<name>
    T (partial)        </name>
<styleUrl>#icon</styleUrl>
<Point>
<coordinates>
6.3333,33.2333
</coordinates>
</Point>
</Placemark>
<Placemark>
<name>
    T (full)        S (sparse)</name>
<styleUrl>#icon</styleUrl>
<Point>
<coordinates>
6.3333,32.6778
</coordinates>
</Point>
</Placemark>
<Placemark>
<name>
    T (partial)        S (sparse)</name>
<styleUrl>#icon</styleUrl>
<Point>
<coordinates>
6.3333,32.1222
</coordinates>
</Point>
</Placemark>
<Placemark>
<name>
    T (partial)        S (partial)</name>
<styleUrl>#icon</styleUrl>
<Point>
<coordinates>
6.3333,31.5667
</coordinates>
</Point>
</Placemark>
<Placemark>
<name>
    T (partial)        S (partial)</name>
<styleUrl>#icon</styleUrl>
<Point>
<coordinates>
6.3333,31.0111
</coordinates>
</Point>
</Placemark>
<Placemark>
<name>
    T (partial)        S (partial)</name>
<styleUrl>#icon</styleUrl>
<Point>
<coordinates>
6.3333,30.4556
</coordinates>
</Point>
</Placemark>
<Placemark>
<name>
    T (partial)        S (partial)</name>
<styleUrl>#icon</styleUrl>
<Point>
<coordinates>
6.3333,29.9
</coordinates>
</Point>
</Placemark>
<Placemark>
<name>
    T (sparse)        S (sparse)</name>
<styleUrl>#icon</styleUrl>
<Point>
<coordinates>
6.3333,29.3444
</coordinates>
</Point>
</Placemark>
<Placemark>
<name>
    T (sparse)        S (sparse)</name>
<styleUrl>#icon</styleUrl>
<Point>
<coordinates>
6.3333,28.7889
</coordinates>
</Point>
</Placemark>
<Placemark>
<name>
    T (sparse)        S (local)</name>
<styleUrl>#icon</styleUrl>
<Point>
<coordinates>
6.3333,28.2333
</coordinates>
</Point>
</Placemark>
<Placemark>
<name>
    T (sparse)        S (local)</name>
<styleUrl>#icon</styleUrl>
<Point>
<coordinates>
6.3333,27.6778
</coordinates>
</Point>
</Placemark>
<Placemark>
<name>
    T (partial)        S (sparse)</name>
<styleUrl>#icon</styleUrl>
<Point>
<coordinates>
6.3333,27.1222
</coordinates>
</Point>
</Placemark>
<Placemark>
<name>
    T (sparse)        S (sparse)</name>
<styleUrl>#icon</styleUrl>
<Point>
<coordinates>
6.3333,26.5667
</coordinates>
</Point>
</Placemark>
<Placemark>
<name>
    T (local)        </name>
<styleUrl>#icon</styleUrl>
<Point>
<coordinates>
6.3333,26.0111
</coordinates>
</Point>
</Placemark>
<Placemark>
<name>
            </name>
<styleUrl>#icon</styleUrl>
<Point>
<coordinates>
6.3333,25.4556
</coordinates>
</Point>
</Placemark>
<Placemark>
<name>
            </name>
<styleUrl>#icon</styleUrl>
<Point>
<coordinates>
6.3333,24.9
</coordinates>
</Point>
</Placemark>
<Placemark>
<name>
            </name>
<styleUrl>#icon</styleUrl>
<Point>
<coordinates>
6.3333,24.3444
</coordinates>
</Point>
</Placemark>
<Placemark>
<name>
            </name>
<styleUrl>#icon</styleUrl>
<Point>
<coordinates>
6.3333,23.7889
</coordinates>
</Point>
</Placemark>
<Placemark>
<name>
            </name>
<styleUrl>#icon</styleUrl>
<Point>
<coordinates>
6.3333,23.2333
</coordinates>
</Point>
</Placemark>
<Placemark>
<name>
    T (local)        </name>
<styleUrl>#icon</styleUrl>
<Point>
<coordinates>
6.3333,22.6778
</coordinates>
</Point>
</Placemark>
<Placemark>
<name>
    T (local)        </name>
<styleUrl>#icon</styleUrl>
<Point>
<coordinates>
6.3333,22.1222
</coordinates>
</Point>
</Placemark>
<Placemark>
<name>
B (local)    T (local)        </name>
<styleUrl>#icon</styleUrl>
<Point>
<coordinates>
6.3333,21.5667
</coordinates>
</Point>
</Placemark>
<Placemark>
<name>
B (local)        L (local)    </name>
<styleUrl>#icon</styleUrl>
<Point>
<coordinates>
6.3333,21.0111
</coordinates>
</Point>
</Placemark>
<Placemark>
<name>
B (sparse)        L (sparse)    </name>
<styleUrl>#icon</styleUrl>
<Point>
<coordinates>
6.3333,20.4556
</coordinates>
</Point>
</Placemark>
<Placemark>
<name>
B (local)        L (local)    </name>
<styleUrl>#icon</styleUrl>
<Point>
<coordinates>
6.3333,19.9
</coordinates>
</Point>
</Placemark>
<Placemark>
<name>
    T (sparse)        </name>
<styleUrl>#icon</styleUrl>
<Point>
<coordinates>
6.3333,19.3444
</coordinates>
</Point>
</Placemark>
<Placemark>
<name>
    T (sparse)        </name>
<styleUrl>#icon</styleUrl>
<Point>
<coordinates>
6.3333,18.7889
</coordinates>
</Point>
</Placemark>
<Placemark>
<name>
B (sparse)    T (sparse)        </name>
<styleUrl>#icon</styleUrl>
<Point>
<coordinates>
6.3333,18.2333
</coordinates>
</Point>
</Placemark>
<Placemark>
<name>
B (sparse)    T (sparse)        </name>
<styleUrl>#icon</styleUrl>
<Point>
<coordinates>
6.3333,17.6778
</coordinates>
</Point>
</Placemark>
<Placemark>
<name>
            </name>
<styleUrl>#icon</styleUrl>
<Point>
<coordinates>
6.3333,17.1222
</coordinates>
</Point>
</Placemark>
<Placemark>
<name>
            </name>
<styleUrl>#icon</styleUrl>
<Point>
<coordinates>
6.3333,16.5667
</coordinates>
</Point>
</Placemark>
<Placemark>
<name>
            </name>
<styleUrl>#icon</styleUrl>
<Point>
<coordinates>
6.3333,16.0111
</coordinates>
</Point>
</Placemark>
<Placemark>
<name>
            </name>
<styleUrl>#icon</styleUrl>
<Point>
<coordinates>
6.3333,15.4556
</coordinates>
</Point>
</Placemark>
<Placemark>
<name>
            </name>
<styleUrl>#icon</styleUrl>
<Point>
<coordinates>
6.3333,14.9
</coordinates>
</Point>
</Placemark>
<Placemark>
<name>
            </name>
<styleUrl>#icon</styleUrl>
<Point>
<coordinates>
6.3333,14.3444
</coordinates>
</Point>
</Placemark>
<Placemark>
<name>
            </name>
<styleUrl>#icon</styleUrl>
<Point>
<coordinates>
6.3333,13.7889
</coordinates>
</Point>
</Placemark>
<Placemark>
<name>
            </name>
<styleUrl>#icon</styleUrl>
<Point>
<coordinates>
6.3333,13.2333
</coordinates>
</Point>
</Placemark>
<Placemark>
<name>
            </name>
<styleUrl>#icon</styleUrl>
<Point>
<coordinates>
7.1667,36.0111
</coordinates>
</Point>
</Placemark>
<Placemark>
<name>
            </name>
<styleUrl>#icon</styleUrl>
<Point>
<coordinates>
7.1667,35.4556
</coordinates>
</Point>
</Placemark>
<Placemark>
<name>
            </name>
<styleUrl>#icon</styleUrl>
<Point>
<coordinates>
7.1667,34.9
</coordinates>
</Point>
</Placemark>
<Placemark>
<name>
    T (partial)        </name>
<styleUrl>#icon</styleUrl>
<Point>
<coordinates>
7.1667,34.3444
</coordinates>
</Point>
</Placemark>
<Placemark>
<name>
    T (partial)        </name>
<styleUrl>#icon</styleUrl>
<Point>
<coordinates>
7.1667,33.7889
</coordinates>
</Point>
</Placemark>
<Placemark>
<name>
    T (full)        </name>
<styleUrl>#icon</styleUrl>
<Point>
<coordinates>
7.1667,33.2333
</coordinates>
</Point>
</Placemark>
<Placemark>
<name>
    T (full)        S (partial)</name>
<styleUrl>#icon</styleUrl>
<Point>
<coordinates>
7.1667,32.6778
</coordinates>
</Point>
</Placemark>
<Placemark>
<name>
B (sparse)    T (full)        S (full)</name>
<styleUrl>#icon</styleUrl>
<Point>
<coordinates>
7.1667,32.1222
</coordinates>
</Point>
</Placemark>
<Placemark>
<name>
B (sparse)    T (full)        S (full)</name>
<styleUrl>#icon</styleUrl>
<Point>
<coordinates>
7.1667,31.5667
</coordinates>
</Point>
</Placemark>
<Placemark>
<name>
B (sparse)    T (full)        S (full)</name>
<styleUrl>#icon</styleUrl>
<Point>
<coordinates>
7.1667,31.0111
</coordinates>
</Point>
</Placemark>
<Placemark>
<name>
    T (full)        S (full)</name>
<styleUrl>#icon</styleUrl>
<Point>
<coordinates>
7.1667,30.4556
</coordinates>
</Point>
</Placemark>
<Placemark>
<name>
    T (full)        S (full)</name>
<styleUrl>#icon</styleUrl>
<Point>
<coordinates>
7.1667,29.9
</coordinates>
</Point>
</Placemark>
<Placemark>
<name>
    T (partial)        S (partial)</name>
<styleUrl>#icon</styleUrl>
<Point>
<coordinates>
7.1667,29.3444
</coordinates>
</Point>
</Placemark>
<Placemark>
<name>
    T (sparse)        S (sparse)</name>
<styleUrl>#icon</styleUrl>
<Point>
<coordinates>
7.1667,28.7889
</coordinates>
</Point>
</Placemark>
<Placemark>
<name>
    T (partial)        S (partial)</name>
<styleUrl>#icon</styleUrl>
<Point>
<coordinates>
7.1667,28.2333
</coordinates>
</Point>
</Placemark>
<Placemark>
<name>
    T (partial)        S (partial)</name>
<styleUrl>#icon</styleUrl>
<Point>
<coordinates>
7.1667,27.6778
</coordinates>
</Point>
</Placemark>
<Placemark>
<name>
    T (partial)        S (partial)</name>
<styleUrl>#icon</styleUrl>
<Point>
<coordinates>
7.1667,27.1222
</coordinates>
</Point>
</Placemark>
<Placemark>
<name>
    T (sparse)        S (sparse)</name>
<styleUrl>#icon</styleUrl>
<Point>
<coordinates>
7.1667,26.5667
</coordinates>
</Point>
</Placemark>
<Placemark>
<name>
    T (sparse)        </name>
<styleUrl>#icon</styleUrl>
<Point>
<coordinates>
7.1667,26.0111
</coordinates>
</Point>
</Placemark>
<Placemark>
<name>
    T (sparse)        S (sparse)</name>
<styleUrl>#icon</styleUrl>
<Point>
<coordinates>
7.1667,25.4556
</coordinates>
</Point>
</Placemark>
<Placemark>
<name>
    T (local)        </name>
<styleUrl>#icon</styleUrl>
<Point>
<coordinates>
7.1667,24.9
</coordinates>
</Point>
</Placemark>
<Placemark>
<name>
            </name>
<styleUrl>#icon</styleUrl>
<Point>
<coordinates>
7.1667,24.3444
</coordinates>
</Point>
</Placemark>
<Placemark>
<name>
            </name>
<styleUrl>#icon</styleUrl>
<Point>
<coordinates>
7.1667,23.7889
</coordinates>
</Point>
</Placemark>
<Placemark>
<name>
            </name>
<styleUrl>#icon</styleUrl>
<Point>
<coordinates>
7.1667,23.2333
</coordinates>
</Point>
</Placemark>
<Placemark>
<name>
    T (sparse)        </name>
<styleUrl>#icon</styleUrl>
<Point>
<coordinates>
7.1667,22.6778
</coordinates>
</Point>
</Placemark>
<Placemark>
<name>
B (local)    T (sparse)    L (sparse)    </name>
<styleUrl>#icon</styleUrl>
<Point>
<coordinates>
7.1667,22.1222
</coordinates>
</Point>
</Placemark>
<Placemark>
<name>
B (sparse)    T (sparse)        </name>
<styleUrl>#icon</styleUrl>
<Point>
<coordinates>
7.1667,21.5667
</coordinates>
</Point>
</Placemark>
<Placemark>
<name>
B (local)            </name>
<styleUrl>#icon</styleUrl>
<Point>
<coordinates>
7.1667,21.0111
</coordinates>
</Point>
</Placemark>
<Placemark>
<name>
            </name>
<styleUrl>#icon</styleUrl>
<Point>
<coordinates>
7.1667,20.4556
</coordinates>
</Point>
</Placemark>
<Placemark>
<name>
            </name>
<styleUrl>#icon</styleUrl>
<Point>
<coordinates>
7.1667,19.9
</coordinates>
</Point>
</Placemark>
<Placemark>
<name>
    T (local)        </name>
<styleUrl>#icon</styleUrl>
<Point>
<coordinates>
7.1667,19.3444
</coordinates>
</Point>
</Placemark>
<Placemark>
<name>
B (local)    T (sparse)        </name>
<styleUrl>#icon</styleUrl>
<Point>
<coordinates>
7.1667,18.7889
</coordinates>
</Point>
</Placemark>
<Placemark>
<name>
            </name>
<styleUrl>#icon</styleUrl>
<Point>
<coordinates>
7.1667,18.2333
</coordinates>
</Point>
</Placemark>
<Placemark>
<name>
            </name>
<styleUrl>#icon</styleUrl>
<Point>
<coordinates>
7.1667,17.6778
</coordinates>
</Point>
</Placemark>
<Placemark>
<name>
            </name>
<styleUrl>#icon</styleUrl>
<Point>
<coordinates>
7.1667,17.1222
</coordinates>
</Point>
</Placemark>
<Placemark>
<name>
            </name>
<styleUrl>#icon</styleUrl>
<Point>
<coordinates>
7.1667,16.5667
</coordinates>
</Point>
</Placemark>
<Placemark>
<name>
            </name>
<styleUrl>#icon</styleUrl>
<Point>
<coordinates>
7.1667,16.0111
</coordinates>
</Point>
</Placemark>
<Placemark>
<name>
            </name>
<styleUrl>#icon</styleUrl>
<Point>
<coordinates>
7.1667,15.4556
</coordinates>
</Point>
</Placemark>
<Placemark>
<name>
            </name>
<styleUrl>#icon</styleUrl>
<Point>
<coordinates>
7.1667,14.9
</coordinates>
</Point>
</Placemark>
<Placemark>
<name>
            </name>
<styleUrl>#icon</styleUrl>
<Point>
<coordinates>
7.1667,14.3444
</coordinates>
</Point>
</Placemark>
<Placemark>
<name>
            </name>
<styleUrl>#icon</styleUrl>
<Point>
<coordinates>
7.1667,13.7889
</coordinates>
</Point>
</Placemark>
<Placemark>
<name>
            </name>
<styleUrl>#icon</styleUrl>
<Point>
<coordinates>
7.1667,13.2333
</coordinates>
</Point>
</Placemark>
<Placemark>
<name>
            </name>
<styleUrl>#icon</styleUrl>
<Point>
<coordinates>
8,36.0111
</coordinates>
</Point>
</Placemark>
<Placemark>
<name>
            </name>
<styleUrl>#icon</styleUrl>
<Point>
<coordinates>
8,35.4556
</coordinates>
</Point>
</Placemark>
<Placemark>
<name>
            </name>
<styleUrl>#icon</styleUrl>
<Point>
<coordinates>
8,34.9
</coordinates>
</Point>
</Placemark>
<Placemark>
<name>
            </name>
<styleUrl>#icon</styleUrl>
<Point>
<coordinates>
8,34.3444
</coordinates>
</Point>
</Placemark>
<Placemark>
<name>
            </name>
<styleUrl>#icon</styleUrl>
<Point>
<coordinates>
8,33.7889
</coordinates>
</Point>
</Placemark>
<Placemark>
<name>
    T (full)        </name>
<styleUrl>#icon</styleUrl>
<Point>
<coordinates>
8,33.2333
</coordinates>
</Point>
</Placemark>
<Placemark>
<name>
    T (full)        S (full)</name>
<styleUrl>#icon</styleUrl>
<Point>
<coordinates>
8,32.6778
</coordinates>
</Point>
</Placemark>
<Placemark>
<name>
    T (full)        S (full)</name>
<styleUrl>#icon</styleUrl>
<Point>
<coordinates>
8,32.1222
</coordinates>
</Point>
</Placemark>
<Placemark>
<name>
    T (full)        S (full)</name>
<styleUrl>#icon</styleUrl>
<Point>
<coordinates>
8,31.5667
</coordinates>
</Point>
</Placemark>
<Placemark>
<name>
    T (full)        S (full)</name>
<styleUrl>#icon</styleUrl>
<Point>
<coordinates>
8,31.0111
</coordinates>
</Point>
</Placemark>
<Placemark>
<name>
    T (full)        S (full)</name>
<styleUrl>#icon</styleUrl>
<Point>
<coordinates>
8,30.4556
</coordinates>
</Point>
</Placemark>
<Placemark>
<name>
    T (full)        S (full)</name>
<styleUrl>#icon</styleUrl>
<Point>
<coordinates>
8,29.9
</coordinates>
</Point>
</Placemark>
<Placemark>
<name>
    T (sparse)        S (sparse)</name>
<styleUrl>#icon</styleUrl>
<Point>
<coordinates>
8,29.3444
</coordinates>
</Point>
</Placemark>
<Placemark>
<name>
    T (local)    L (local)    </name>
<styleUrl>#icon</styleUrl>
<Point>
<coordinates>
8,28.7889
</coordinates>
</Point>
</Placemark>
<Placemark>
<name>
    T (partial)    L (sparse)    S (partial)</name>
<styleUrl>#icon</styleUrl>
<Point>
<coordinates>
8,28.2333
</coordinates>
</Point>
</Placemark>
<Placemark>
<name>
    T (partial)    L (sparse)    S (sparse)</name>
<styleUrl>#icon</styleUrl>
<Point>
<coordinates>
8,27.6778
</coordinates>
</Point>
</Placemark>
<Placemark>
<name>
    T (partial)        S (partial)</name>
<styleUrl>#icon</styleUrl>
<Point>
<coordinates>
8,27.1222
</coordinates>
</Point>
</Placemark>
<Placemark>
<name>
    T (sparse)        S (sparse)</name>
<styleUrl>#icon</styleUrl>
<Point>
<coordinates>
8,26.5667
</coordinates>
</Point>
</Placemark>
<Placemark>
<name>
            </name>
<styleUrl>#icon</styleUrl>
<Point>
<coordinates>
8,26.0111
</coordinates>
</Point>
</Placemark>
<Placemark>
<name>
            </name>
<styleUrl>#icon</styleUrl>
<Point>
<coordinates>
8,25.4556
</coordinates>
</Point>
</Placemark>
<Placemark>
<name>
    T (local)        </name>
<styleUrl>#icon</styleUrl>
<Point>
<coordinates>
8,24.9
</coordinates>
</Point>
</Placemark>
<Placemark>
<name>
            </name>
<styleUrl>#icon</styleUrl>
<Point>
<coordinates>
8,24.3444
</coordinates>
</Point>
</Placemark>
<Placemark>
<name>
            </name>
<styleUrl>#icon</styleUrl>
<Point>
<coordinates>
8,23.7889
</coordinates>
</Point>
</Placemark>
<Placemark>
<name>
            </name>
<styleUrl>#icon</styleUrl>
<Point>
<coordinates>
8,23.2333
</coordinates>
</Point>
</Placemark>
<Placemark>
<name>
            </name>
<styleUrl>#icon</styleUrl>
<Point>
<coordinates>
8,22.6778
</coordinates>
</Point>
</Placemark>
<Placemark>
<name>
        L (local)    </name>
<styleUrl>#icon</styleUrl>
<Point>
<coordinates>
8,22.1222
</coordinates>
</Point>
</Placemark>
<Placemark>
<name>
B (local)        L (local)    </name>
<styleUrl>#icon</styleUrl>
<Point>
<coordinates>
8,21.5667
</coordinates>
</Point>
</Placemark>
<Placemark>
<name>
B (local)        L (local)    </name>
<styleUrl>#icon</styleUrl>
<Point>
<coordinates>
8,21.0111
</coordinates>
</Point>
</Placemark>
<Placemark>
<name>
            </name>
<styleUrl>#icon</styleUrl>
<Point>
<coordinates>
8,20.4556
</coordinates>
</Point>
</Placemark>
<Placemark>
<name>
            </name>
<styleUrl>#icon</styleUrl>
<Point>
<coordinates>
8,19.9
</coordinates>
</Point>
</Placemark>
<Placemark>
<name>
            </name>
<styleUrl>#icon</styleUrl>
<Point>
<coordinates>
8,19.3444
</coordinates>
</Point>
</Placemark>
<Placemark>
<name>
            </name>
<styleUrl>#icon</styleUrl>
<Point>
<coordinates>
8,18.7889
</coordinates>
</Point>
</Placemark>
<Placemark>
<name>
            </name>
<styleUrl>#icon</styleUrl>
<Point>
<coordinates>
8,18.2333
</coordinates>
</Point>
</Placemark>
<Placemark>
<name>
            </name>
<styleUrl>#icon</styleUrl>
<Point>
<coordinates>
8,17.6778
</coordinates>
</Point>
</Placemark>
<Placemark>
<name>
            </name>
<styleUrl>#icon</styleUrl>
<Point>
<coordinates>
8,17.1222
</coordinates>
</Point>
</Placemark>
<Placemark>
<name>
B (local)            </name>
<styleUrl>#icon</styleUrl>
<Point>
<coordinates>
8,16.5667
</coordinates>
</Point>
</Placemark>
<Placemark>
<name>
            </name>
<styleUrl>#icon</styleUrl>
<Point>
<coordinates>
8,16.0111
</coordinates>
</Point>
</Placemark>
<Placemark>
<name>
            </name>
<styleUrl>#icon</styleUrl>
<Point>
<coordinates>
8,15.4556
</coordinates>
</Point>
</Placemark>
<Placemark>
<name>
            </name>
<styleUrl>#icon</styleUrl>
<Point>
<coordinates>
8,14.9
</coordinates>
</Point>
</Placemark>
<Placemark>
<name>
            </name>
<styleUrl>#icon</styleUrl>
<Point>
<coordinates>
8,14.3444
</coordinates>
</Point>
</Placemark>
<Placemark>
<name>
            </name>
<styleUrl>#icon</styleUrl>
<Point>
<coordinates>
8,13.7889
</coordinates>
</Point>
</Placemark>
<Placemark>
<name>
            </name>
<styleUrl>#icon</styleUrl>
<Point>
<coordinates>
8,13.2333
</coordinates>
</Point>
</Placemark>
<Placemark>
<name>
            </name>
<styleUrl>#icon</styleUrl>
<Point>
<coordinates>
8,12.6778
</coordinates>
</Point>
</Placemark>
<Placemark>
<name>
            </name>
<styleUrl>#icon</styleUrl>
<Point>
<coordinates>
8.8333,36.5667
</coordinates>
</Point>
</Placemark>
<Placemark>
<name>
            </name>
<styleUrl>#icon</styleUrl>
<Point>
<coordinates>
8.8333,36.0111
</coordinates>
</Point>
</Placemark>
<Placemark>
<name>
            </name>
<styleUrl>#icon</styleUrl>
<Point>
<coordinates>
8.8333,35.4556
</coordinates>
</Point>
</Placemark>
<Placemark>
<name>
            </name>
<styleUrl>#icon</styleUrl>
<Point>
<coordinates>
8.8333,34.9
</coordinates>
</Point>
</Placemark>
<Placemark>
<name>
            </name>
<styleUrl>#icon</styleUrl>
<Point>
<coordinates>
8.8333,34.3444
</coordinates>
</Point>
</Placemark>
<Placemark>
<name>
B (local)    T (sparse)        </name>
<styleUrl>#icon</styleUrl>
<Point>
<coordinates>
8.8333,33.7889
</coordinates>
</Point>
</Placemark>
<Placemark>
<name>
    T (partial)        </name>
<styleUrl>#icon</styleUrl>
<Point>
<coordinates>
8.8333,33.2333
</coordinates>
</Point>
</Placemark>
<Placemark>
<name>
    T (full)        S (sparse)</name>
<styleUrl>#icon</styleUrl>
<Point>
<coordinates>
8.8333,32.6778
</coordinates>
</Point>
</Placemark>
<Placemark>
<name>
    T (full)        S (partial)</name>
<styleUrl>#icon</styleUrl>
<Point>
<coordinates>
8.8333,32.1222
</coordinates>
</Point>
</Placemark>
<Placemark>
<name>
    T (full)        S (partial)</name>
<styleUrl>#icon</styleUrl>
<Point>
<coordinates>
8.8333,31.5667
</coordinates>
</Point>
</Placemark>
<Placemark>
<name>
    T (full)        S (full)</name>
<styleUrl>#icon</styleUrl>
<Point>
<coordinates>
8.8333,31.0111
</coordinates>
</Point>
</Placemark>
<Placemark>
<name>
    T (full)        S (full)</name>
<styleUrl>#icon</styleUrl>
<Point>
<coordinates>
8.8333,30.4556
</coordinates>
</Point>
</Placemark>
<Placemark>
<name>
    T (sparse)        S (sparse)</name>
<styleUrl>#icon</styleUrl>
<Point>
<coordinates>
8.8333,29.9
</coordinates>
</Point>
</Placemark>
<Placemark>
<name>
    T (local)        S (local)</name>
<styleUrl>#icon</styleUrl>
<Point>
<coordinates>
8.8333,29.3444
</coordinates>
</Point>
</Placemark>
<Placemark>
<name>
    T (sparse)    L (sparse)    </name>
<styleUrl>#icon</styleUrl>
<Point>
<coordinates>
8.8333,28.7889
</coordinates>
</Point>
</Placemark>
<Placemark>
<name>
    T (sparse)    L (sparse)    </name>
<styleUrl>#icon</styleUrl>
<Point>
<coordinates>
8.8333,28.2333
</coordinates>
</Point>
</Placemark>
<Placemark>
<name>
    T (sparse)    L (sparse)    S (sparse)</name>
<styleUrl>#icon</styleUrl>
<Point>
<coordinates>
8.8333,27.6778
</coordinates>
</Point>
</Placemark>
<Placemark>
<name>
    T (sparse)        </name>
<styleUrl>#icon</styleUrl>
<Point>
<coordinates>
8.8333,27.1222
</coordinates>
</Point>
</Placemark>
<Placemark>
<name>
    T (sparse)        </name>
<styleUrl>#icon</styleUrl>
<Point>
<coordinates>
8.8333,26.5667
</coordinates>
</Point>
</Placemark>
<Placemark>
<name>
    T (local)        </name>
<styleUrl>#icon</styleUrl>
<Point>
<coordinates>
8.8333,26.0111
</coordinates>
</Point>
</Placemark>
<Placemark>
<name>
            </name>
<styleUrl>#icon</styleUrl>
<Point>
<coordinates>
8.8333,25.4556
</coordinates>
</Point>
</Placemark>
<Placemark>
<name>
    T (sparse)        S (local)</name>
<styleUrl>#icon</styleUrl>
<Point>
<coordinates>
8.8333,24.9
</coordinates>
</Point>
</Placemark>
<Placemark>
<name>
    T (sparse)        S (sparse)</name>
<styleUrl>#icon</styleUrl>
<Point>
<coordinates>
8.8333,24.3444
</coordinates>
</Point>
</Placemark>
<Placemark>
<name>
    T (local)        </name>
<styleUrl>#icon</styleUrl>
<Point>
<coordinates>
8.8333,23.7889
</coordinates>
</Point>
</Placemark>
<Placemark>
<name>
B (local)    T (local)    L (local)    </name>
<styleUrl>#icon</styleUrl>
<Point>
<coordinates>
8.8333,23.2333
</coordinates>
</Point>
</Placemark>
<Placemark>
<name>
B (sparse)    T (sparse)    L (sparse)    </name>
<styleUrl>#icon</styleUrl>
<Point>
<coordinates>
8.8333,22.6778
</coordinates>
</Point>
</Placemark>
<Placemark>
<name>
B (sparse)        L (sparse)    </name>
<styleUrl>#icon</styleUrl>
<Point>
<coordinates>
8.8333,22.1222
</coordinates>
</Point>
</Placemark>
<Placemark>
<name>
B (local)            </name>
<styleUrl>#icon</styleUrl>
<Point>
<coordinates>
8.8333,21.5667
</coordinates>
</Point>
</Placemark>
<Placemark>
<name>
B (local)            </name>
<styleUrl>#icon</styleUrl>
<Point>
<coordinates>
8.8333,21.0111
</coordinates>
</Point>
</Placemark>
<Placemark>
<name>
    T (sparse)    L (sparse)    </name>
<styleUrl>#icon</styleUrl>
<Point>
<coordinates>
8.8333,20.4556
</coordinates>
</Point>
</Placemark>
<Placemark>
<name>
    T (sparse)    L (sparse)    </name>
<styleUrl>#icon</styleUrl>
<Point>
<coordinates>
8.8333,19.9
</coordinates>
</Point>
</Placemark>
<Placemark>
<name>
    T (sparse)    L (sparse)    S (local)</name>
<styleUrl>#icon</styleUrl>
<Point>
<coordinates>
8.8333,19.3444
</coordinates>
</Point>
</Placemark>
<Placemark>
<name>
            </name>
<styleUrl>#icon</styleUrl>
<Point>
<coordinates>
8.8333,18.7889
</coordinates>
</Point>
</Placemark>
<Placemark>
<name>
            </name>
<styleUrl>#icon</styleUrl>
<Point>
<coordinates>
8.8333,18.2333
</coordinates>
</Point>
</Placemark>
<Placemark>
<name>
            </name>
<styleUrl>#icon</styleUrl>
<Point>
<coordinates>
8.8333,17.6778
</coordinates>
</Point>
</Placemark>
<Placemark>
<name>
B (sparse)    T (sparse)        </name>
<styleUrl>#icon</styleUrl>
<Point>
<coordinates>
8.8333,17.1222
</coordinates>
</Point>
</Placemark>
<Placemark>
<name>
B (partial)    T (sparse)        </name>
<styleUrl>#icon</styleUrl>
<Point>
<coordinates>
8.8333,16.5667
</coordinates>
</Point>
</Placemark>
<Placemark>
<name>
B (local)            </name>
<styleUrl>#icon</styleUrl>
<Point>
<coordinates>
8.8333,16.0111
</coordinates>
</Point>
</Placemark>
<Placemark>
<name>
            </name>
<styleUrl>#icon</styleUrl>
<Point>
<coordinates>
8.8333,15.4556
</coordinates>
</Point>
</Placemark>
<Placemark>
<name>
            </name>
<styleUrl>#icon</styleUrl>
<Point>
<coordinates>
8.8333,14.9
</coordinates>
</Point>
</Placemark>
<Placemark>
<name>
            </name>
<styleUrl>#icon</styleUrl>
<Point>
<coordinates>
8.8333,14.3444
</coordinates>
</Point>
</Placemark>
<Placemark>
<name>
            </name>
<styleUrl>#icon</styleUrl>
<Point>
<coordinates>
8.8333,13.7889
</coordinates>
</Point>
</Placemark>
<Placemark>
<name>
            </name>
<styleUrl>#icon</styleUrl>
<Point>
<coordinates>
8.8333,13.2333
</coordinates>
</Point>
</Placemark>
<Placemark>
<name>
            </name>
<styleUrl>#icon</styleUrl>
<Point>
<coordinates>
8.8333,12.6778
</coordinates>
</Point>
</Placemark>
<Placemark>
<name>
            </name>
<styleUrl>#icon</styleUrl>
<Point>
<coordinates>
8.8333,12.1222
</coordinates>
</Point>
</Placemark>
<Placemark>
<name>
            </name>
<styleUrl>#icon</styleUrl>
<Point>
<coordinates>
9.6667,36.5667
</coordinates>
</Point>
</Placemark>
<Placemark>
<name>
            </name>
<styleUrl>#icon</styleUrl>
<Point>
<coordinates>
9.6667,36.0111
</coordinates>
</Point>
</Placemark>
<Placemark>
<name>
            </name>
<styleUrl>#icon</styleUrl>
<Point>
<coordinates>
9.6667,35.4556
</coordinates>
</Point>
</Placemark>
<Placemark>
<name>
            </name>
<styleUrl>#icon</styleUrl>
<Point>
<coordinates>
9.6667,34.9
</coordinates>
</Point>
</Placemark>
<Placemark>
<name>
B (local)    T (local)        </name>
<styleUrl>#icon</styleUrl>
<Point>
<coordinates>
9.6667,34.3444
</coordinates>
</Point>
</Placemark>
<Placemark>
<name>
B (local)    T (sparse)        </name>
<styleUrl>#icon</styleUrl>
<Point>
<coordinates>
9.6667,33.7889
</coordinates>
</Point>
</Placemark>
<Placemark>
<name>
B (partial)    T (partial)        </name>
<styleUrl>#icon</styleUrl>
<Point>
<coordinates>
9.6667,33.2333
</coordinates>
</Point>
</Placemark>
<Placemark>
<name>
B (partial)    T (partial)        </name>
<styleUrl>#icon</styleUrl>
<Point>
<coordinates>
9.6667,32.6778
</coordinates>
</Point>
</Placemark>
<Placemark>
<name>
B (partial)    T (partial)        </name>
<styleUrl>#icon</styleUrl>
<Point>
<coordinates>
9.6667,32.1222
</coordinates>
</Point>
</Placemark>
<Placemark>
<name>
B (partial)    T (partial)        </name>
<styleUrl>#icon</styleUrl>
<Point>
<coordinates>
9.6667,31.5667
</coordinates>
</Point>
</Placemark>
<Placemark>
<name>
    T (partial)        S (sparse)</name>
<styleUrl>#icon</styleUrl>
<Point>
<coordinates>
9.6667,31.0111
</coordinates>
</Point>
</Placemark>
<Placemark>
<name>
    T (partial)        S (partial)</name>
<styleUrl>#icon</styleUrl>
<Point>
<coordinates>
9.6667,30.4556
</coordinates>
</Point>
</Placemark>
<Placemark>
<name>
    T (local)        S (local)</name>
<styleUrl>#icon</styleUrl>
<Point>
<coordinates>
9.6667,29.9
</coordinates>
</Point>
</Placemark>
<Placemark>
<name>
            </name>
<styleUrl>#icon</styleUrl>
<Point>
<coordinates>
9.6667,29.3444
</coordinates>
</Point>
</Placemark>
<Placemark>
<name>
    T (local)    L (local)    S (local)</name>
<styleUrl>#icon</styleUrl>
<Point>
<coordinates>
9.6667,28.7889
</coordinates>
</Point>
</Placemark>
<Placemark>
<name>
    T (sparse)        S (sparse)</name>
<styleUrl>#icon</styleUrl>
<Point>
<coordinates>
9.6667,28.2333
</coordinates>
</Point>
</Placemark>
<Placemark>
<name>
    T (partial)        S (partial)</name>
<styleUrl>#icon</styleUrl>
<Point>
<coordinates>
9.6667,27.6778
</coordinates>
</Point>
</Placemark>
<Placemark>
<name>
    T (sparse)        S (local)</name>
<styleUrl>#icon</styleUrl>
<Point>
<coordinates>
9.6667,27.1222
</coordinates>
</Point>
</Placemark>
<Placemark>
<name>
    T (sparse)        S (sparse)</name>
<styleUrl>#icon</styleUrl>
<Point>
<coordinates>
9.6667,26.5667
</coordinates>
</Point>
</Placemark>
<Placemark>
<name>
    T (sparse)        S (local)</name>
<styleUrl>#icon</styleUrl>
<Point>
<coordinates>
9.6667,26.0111
</coordinates>
</Point>
</Placemark>
<Placemark>
<name>
    T (local)        S (local)</name>
<styleUrl>#icon</styleUrl>
<Point>
<coordinates>
9.6667,25.4556
</coordinates>
</Point>
</Placemark>
<Placemark>
<name>
    T (local)        S (local)</name>
<styleUrl>#icon</styleUrl>
<Point>
<coordinates>
9.6667,24.9
</coordinates>
</Point>
</Placemark>
<Placemark>
<name>
    T (sparse)        S (sparse)</name>
<styleUrl>#icon</styleUrl>
<Point>
<coordinates>
9.6667,24.3444
</coordinates>
</Point>
</Placemark>
<Placemark>
<name>
    T (sparse)        S (local)</name>
<styleUrl>#icon</styleUrl>
<Point>
<coordinates>
9.6667,23.7889
</coordinates>
</Point>
</Placemark>
<Placemark>
<name>
    T (local)    L (local)    </name>
<styleUrl>#icon</styleUrl>
<Point>
<coordinates>
9.6667,23.2333
</coordinates>
</Point>
</Placemark>
<Placemark>
<name>
    T (local)    L (local)    </name>
<styleUrl>#icon</styleUrl>
<Point>
<coordinates>
9.6667,22.6778
</coordinates>
</Point>
</Placemark>
<Placemark>
<name>
B (sparse)    T (sparse)    L (sparse)    </name>
<styleUrl>#icon</styleUrl>
<Point>
<coordinates>
9.6667,22.1222
</coordinates>
</Point>
</Placemark>
<Placemark>
<name>
B (sparse)    T (sparse)    L (sparse)    </name>
<styleUrl>#icon</styleUrl>
<Point>
<coordinates>
9.6667,21.5667
</coordinates>
</Point>
</Placemark>
<Placemark>
<name>
B (local)        L (local)    </name>
<styleUrl>#icon</styleUrl>
<Point>
<coordinates>
9.6667,21.0111
</coordinates>
</Point>
</Placemark>
<Placemark>
<name>
        L (local)    </name>
<styleUrl>#icon</styleUrl>
<Point>
<coordinates>
9.6667,20.4556
</coordinates>
</Point>
</Placemark>
<Placemark>
<name>
    T (sparse)    L (sparse)    </name>
<styleUrl>#icon</styleUrl>
<Point>
<coordinates>
9.6667,19.9
</coordinates>
</Point>
</Placemark>
<Placemark>
<name>
    T (sparse)    L (partial)    S (local)</name>
<styleUrl>#icon</styleUrl>
<Point>
<coordinates>
9.6667,19.3444
</coordinates>
</Point>
</Placemark>
<Placemark>
<name>
B (local)    T (local)    L (partial)    </name>
<styleUrl>#icon</styleUrl>
<Point>
<coordinates>
9.6667,18.7889
</coordinates>
</Point>
</Placemark>
<Placemark>
<name>
B (sparse)        L (sparse)    </name>
<styleUrl>#icon</styleUrl>
<Point>
<coordinates>
9.6667,18.2333
</coordinates>
</Point>
</Placemark>
<Placemark>
<name>
B (sparse)    T (sparse)        </name>
<styleUrl>#icon</styleUrl>
<Point>
<coordinates>
9.6667,17.6778
</coordinates>
</Point>
</Placemark>
<Placemark>
<name>
B (partial)    T (partial)        </name>
<styleUrl>#icon</styleUrl>
<Point>
<coordinates>
9.6667,17.1222
</coordinates>
</Point>
</Placemark>
<Placemark>
<name>
B (partial)    T (partial)        </name>
<styleUrl>#icon</styleUrl>
<Point>
<coordinates>
9.6667,16.5667
</coordinates>
</Point>
</Placemark>
<Placemark>
<name>
B (sparse)    T (sparse)        </name>
<styleUrl>#icon</styleUrl>
<Point>
<coordinates>
9.6667,16.0111
</coordinates>
</Point>
</Placemark>
<Placemark>
<name>
            </name>
<styleUrl>#icon</styleUrl>
<Point>
<coordinates>
9.6667,15.4556
</coordinates>
</Point>
</Placemark>
<Placemark>
<name>
            </name>
<styleUrl>#icon</styleUrl>
<Point>
<coordinates>
9.6667,14.9
</coordinates>
</Point>
</Placemark>
<Placemark>
<name>
            </name>
<styleUrl>#icon</styleUrl>
<Point>
<coordinates>
9.6667,14.3444
</coordinates>
</Point>
</Placemark>
<Placemark>
<name>
            </name>
<styleUrl>#icon</styleUrl>
<Point>
<coordinates>
9.6667,13.7889
</coordinates>
</Point>
</Placemark>
<Placemark>
<name>
            </name>
<styleUrl>#icon</styleUrl>
<Point>
<coordinates>
9.6667,13.2333
</coordinates>
</Point>
</Placemark>
<Placemark>
<name>
            </name>
<styleUrl>#icon</styleUrl>
<Point>
<coordinates>
9.6667,12.6778
</coordinates>
</Point>
</Placemark>
<Placemark>
<name>
            </name>
<styleUrl>#icon</styleUrl>
<Point>
<coordinates>
9.6667,12.1222
</coordinates>
</Point>
</Placemark>
<Placemark>
<name>
            </name>
<styleUrl>#icon</styleUrl>
<Point>
<coordinates>
10.5,36.0111
</coordinates>
</Point>
</Placemark>
<Placemark>
<name>
            </name>
<styleUrl>#icon</styleUrl>
<Point>
<coordinates>
10.5,35.4556
</coordinates>
</Point>
</Placemark>
<Placemark>
<name>
            </name>
<styleUrl>#icon</styleUrl>
<Point>
<coordinates>
10.5,34.9
</coordinates>
</Point>
</Placemark>
<Placemark>
<name>
    T (local)        </name>
<styleUrl>#icon</styleUrl>
<Point>
<coordinates>
10.5,33.7889
</coordinates>
</Point>
</Placemark>
<Placemark>
<name>
    T (local)        </name>
<styleUrl>#icon</styleUrl>
<Point>
<coordinates>
10.5,33.2333
</coordinates>
</Point>
</Placemark>
<Placemark>
<name>
    T (sparse)        </name>
<styleUrl>#icon</styleUrl>
<Point>
<coordinates>
10.5,32.6778
</coordinates>
</Point>
</Placemark>
<Placemark>
<name>
B (sparse)    T (sparse)        </name>
<styleUrl>#icon</styleUrl>
<Point>
<coordinates>
10.5,32.1222
</coordinates>
</Point>
</Placemark>
<Placemark>
<name>
B (sparse)    T (sparse)        </name>
<styleUrl>#icon</styleUrl>
<Point>
<coordinates>
10.5,31.5667
</coordinates>
</Point>
</Placemark>
<Placemark>
<name>
B (sparse)    T (sparse)        </name>
<styleUrl>#icon</styleUrl>
<Point>
<coordinates>
10.5,31.0111
</coordinates>
</Point>
</Placemark>
<Placemark>
<name>
B (local)    T (sparse)        S (local)</name>
<styleUrl>#icon</styleUrl>
<Point>
<coordinates>
10.5,30.4556
</coordinates>
</Point>
</Placemark>
<Placemark>
<name>
            </name>
<styleUrl>#icon</styleUrl>
<Point>
<coordinates>
10.5,29.9
</coordinates>
</Point>
</Placemark>
<Placemark>
<name>
            </name>
<styleUrl>#icon</styleUrl>
<Point>
<coordinates>
10.5,29.3444
</coordinates>
</Point>
</Placemark>
<Placemark>
<name>
    T (local)        S (local)</name>
<styleUrl>#icon</styleUrl>
<Point>
<coordinates>
10.5,28.7889
</coordinates>
</Point>
</Placemark>
<Placemark>
<name>
    T (sparse)        S (local)</name>
<styleUrl>#icon</styleUrl>
<Point>
<coordinates>
10.5,28.2333
</coordinates>
</Point>
</Placemark>
<Placemark>
<name>
    T (partial)        S (partial)</name>
<styleUrl>#icon</styleUrl>
<Point>
<coordinates>
10.5,27.6778
</coordinates>
</Point>
</Placemark>
<Placemark>
<name>
    T (sparse)        S (sparse)</name>
<styleUrl>#icon</styleUrl>
<Point>
<coordinates>
10.5,27.1222
</coordinates>
</Point>
</Placemark>
<Placemark>
<name>
    T (partial)        S (partial)</name>
<styleUrl>#icon</styleUrl>
<Point>
<coordinates>
10.5,26.5667
</coordinates>
</Point>
</Placemark>
<Placemark>
<name>
    T (sparse)        S (sparse)</name>
<styleUrl>#icon</styleUrl>
<Point>
<coordinates>
10.5,26.0111
</coordinates>
</Point>
</Placemark>
<Placemark>
<name>
    T (sparse)        S (sparse)</name>
<styleUrl>#icon</styleUrl>
<Point>
<coordinates>
10.5,25.4556
</coordinates>
</Point>
</Placemark>
<Placemark>
<name>
    T (sparse)        S (local)</name>
<styleUrl>#icon</styleUrl>
<Point>
<coordinates>
10.5,24.9
</coordinates>
</Point>
</Placemark>
<Placemark>
<name>
    T (local)        </name>
<styleUrl>#icon</styleUrl>
<Point>
<coordinates>
10.5,24.3444
</coordinates>
</Point>
</Placemark>
<Placemark>
<name>
            </name>
<styleUrl>#icon</styleUrl>
<Point>
<coordinates>
10.5,23.7889
</coordinates>
</Point>
</Placemark>
<Placemark>
<name>
            </name>
<styleUrl>#icon</styleUrl>
<Point>
<coordinates>
10.5,23.2333
</coordinates>
</Point>
</Placemark>
<Placemark>
<name>
B (local)            </name>
<styleUrl>#icon</styleUrl>
<Point>
<coordinates>
10.5,22.6778
</coordinates>
</Point>
</Placemark>
<Placemark>
<name>
            </name>
<styleUrl>#icon</styleUrl>
<Point>
<coordinates>
10.5,22.1222
</coordinates>
</Point>
</Placemark>
<Placemark>
<name>
            </name>
<styleUrl>#icon</styleUrl>
<Point>
<coordinates>
10.5,21.5667
</coordinates>
</Point>
</Placemark>
<Placemark>
<name>
        L (local)    </name>
<styleUrl>#icon</styleUrl>
<Point>
<coordinates>
10.5,21.0111
</coordinates>
</Point>
</Placemark>
<Placemark>
<name>
        L (local)    </name>
<styleUrl>#icon</styleUrl>
<Point>
<coordinates>
10.5,20.4556
</coordinates>
</Point>
</Placemark>
<Placemark>
<name>
        L (sparse)    </name>
<styleUrl>#icon</styleUrl>
<Point>
<coordinates>
10.5,19.9
</coordinates>
</Point>
</Placemark>
<Placemark>
<name>
        L (partial)    </name>
<styleUrl>#icon</styleUrl>
<Point>
<coordinates>
10.5,19.3444
</coordinates>
</Point>
</Placemark>
<Placemark>
<name>
    T (sparse)    L (partial)    </name>
<styleUrl>#icon</styleUrl>
<Point>
<coordinates>
10.5,18.7889
</coordinates>
</Point>
</Placemark>
<Placemark>
<name>
        L (sparse)    </name>
<styleUrl>#icon</styleUrl>
<Point>
<coordinates>
10.5,18.2333
</coordinates>
</Point>
</Placemark>
<Placemark>
<name>
    T (partial)    L (partial)    </name>
<styleUrl>#icon</styleUrl>
<Point>
<coordinates>
10.5,17.6778
</coordinates>
</Point>
</Placemark>
<Placemark>
<name>
B (sparse)    T (full)    L (full)    </name>
<styleUrl>#icon</styleUrl>
<Point>
<coordinates>
10.5,17.1222
</coordinates>
</Point>
</Placemark>
<Placemark>
<name>
B (sparse)    T (sparse)    L (partial)    </name>
<styleUrl>#icon</styleUrl>
<Point>
<coordinates>
10.5,16.5667
</coordinates>
</Point>
</Placemark>
<Placemark>
<name>
    T (sparse)    L (sparse)    </name>
<styleUrl>#icon</styleUrl>
<Point>
<coordinates>
10.5,16.0111
</coordinates>
</Point>
</Placemark>
<Placemark>
<name>
            </name>
<styleUrl>#icon</styleUrl>
<Point>
<coordinates>
10.5,15.4556
</coordinates>
</Point>
</Placemark>
<Placemark>
<name>
            </name>
<styleUrl>#icon</styleUrl>
<Point>
<coordinates>
10.5,14.9
</coordinates>
</Point>
</Placemark>
<Placemark>
<name>
            </name>
<styleUrl>#icon</styleUrl>
<Point>
<coordinates>
10.5,14.3444
</coordinates>
</Point>
</Placemark>
<Placemark>
<name>
            </name>
<styleUrl>#icon</styleUrl>
<Point>
<coordinates>
10.5,13.7889
</coordinates>
</Point>
</Placemark>
<Placemark>
<name>
            </name>
<styleUrl>#icon</styleUrl>
<Point>
<coordinates>
10.5,13.2333
</coordinates>
</Point>
</Placemark>
<Placemark>
<name>
            </name>
<styleUrl>#icon</styleUrl>
<Point>
<coordinates>
10.5,12.6778
</coordinates>
</Point>
</Placemark>
<Placemark>
<name>
            </name>
<styleUrl>#icon</styleUrl>
<Point>
<coordinates>
10.5,12.1222
</coordinates>
</Point>
</Placemark>
<Placemark>
<name>
            </name>
<styleUrl>#icon</styleUrl>
<Point>
<coordinates>
11.3333,42.6778
</coordinates>
</Point>
</Placemark>
<Placemark>
<name>
            </name>
[truncated: 967,748 more chars]
