# Supplementary figures and images for: Desert dunes transformed by end-of-century changes in wind climate
Source: Research Square preprint supplement (doi:10.21203/rs.3.rs-1537759/v1), 2022-04-13

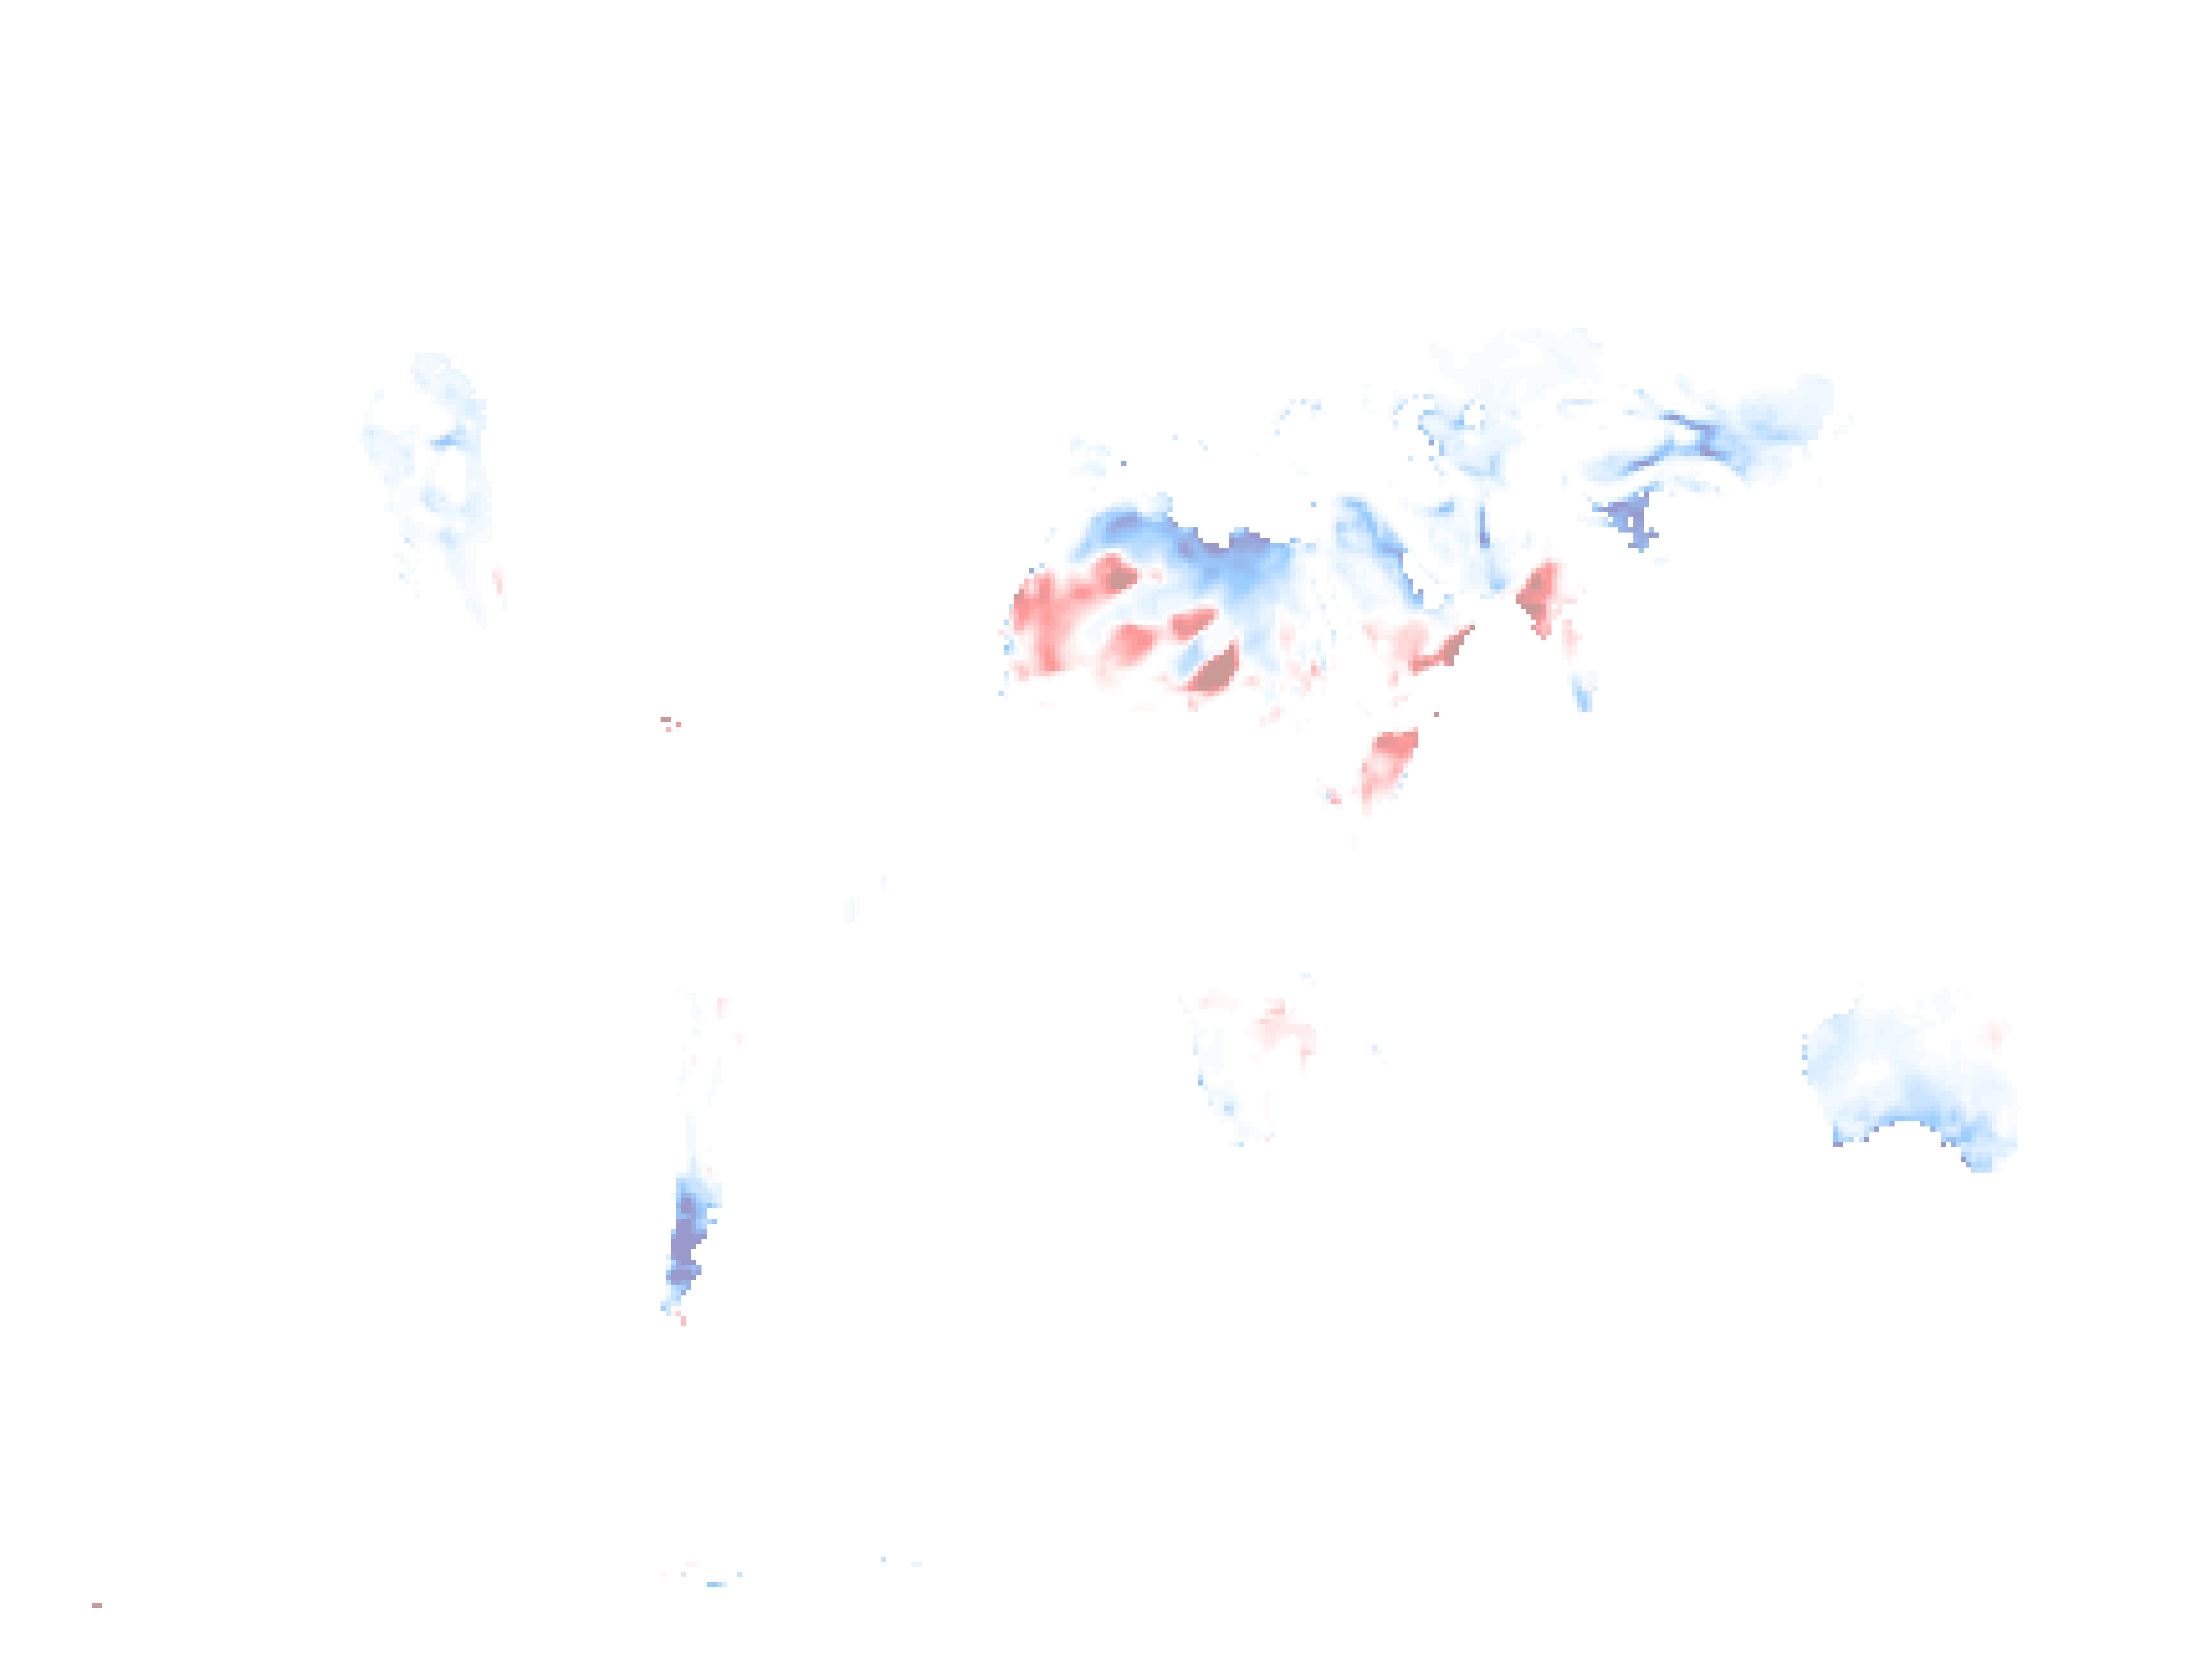

Supplement: Supplementary file 2 [file 5516baa84cd08dcf750e9d30.zip › GE_DPdiff.png]

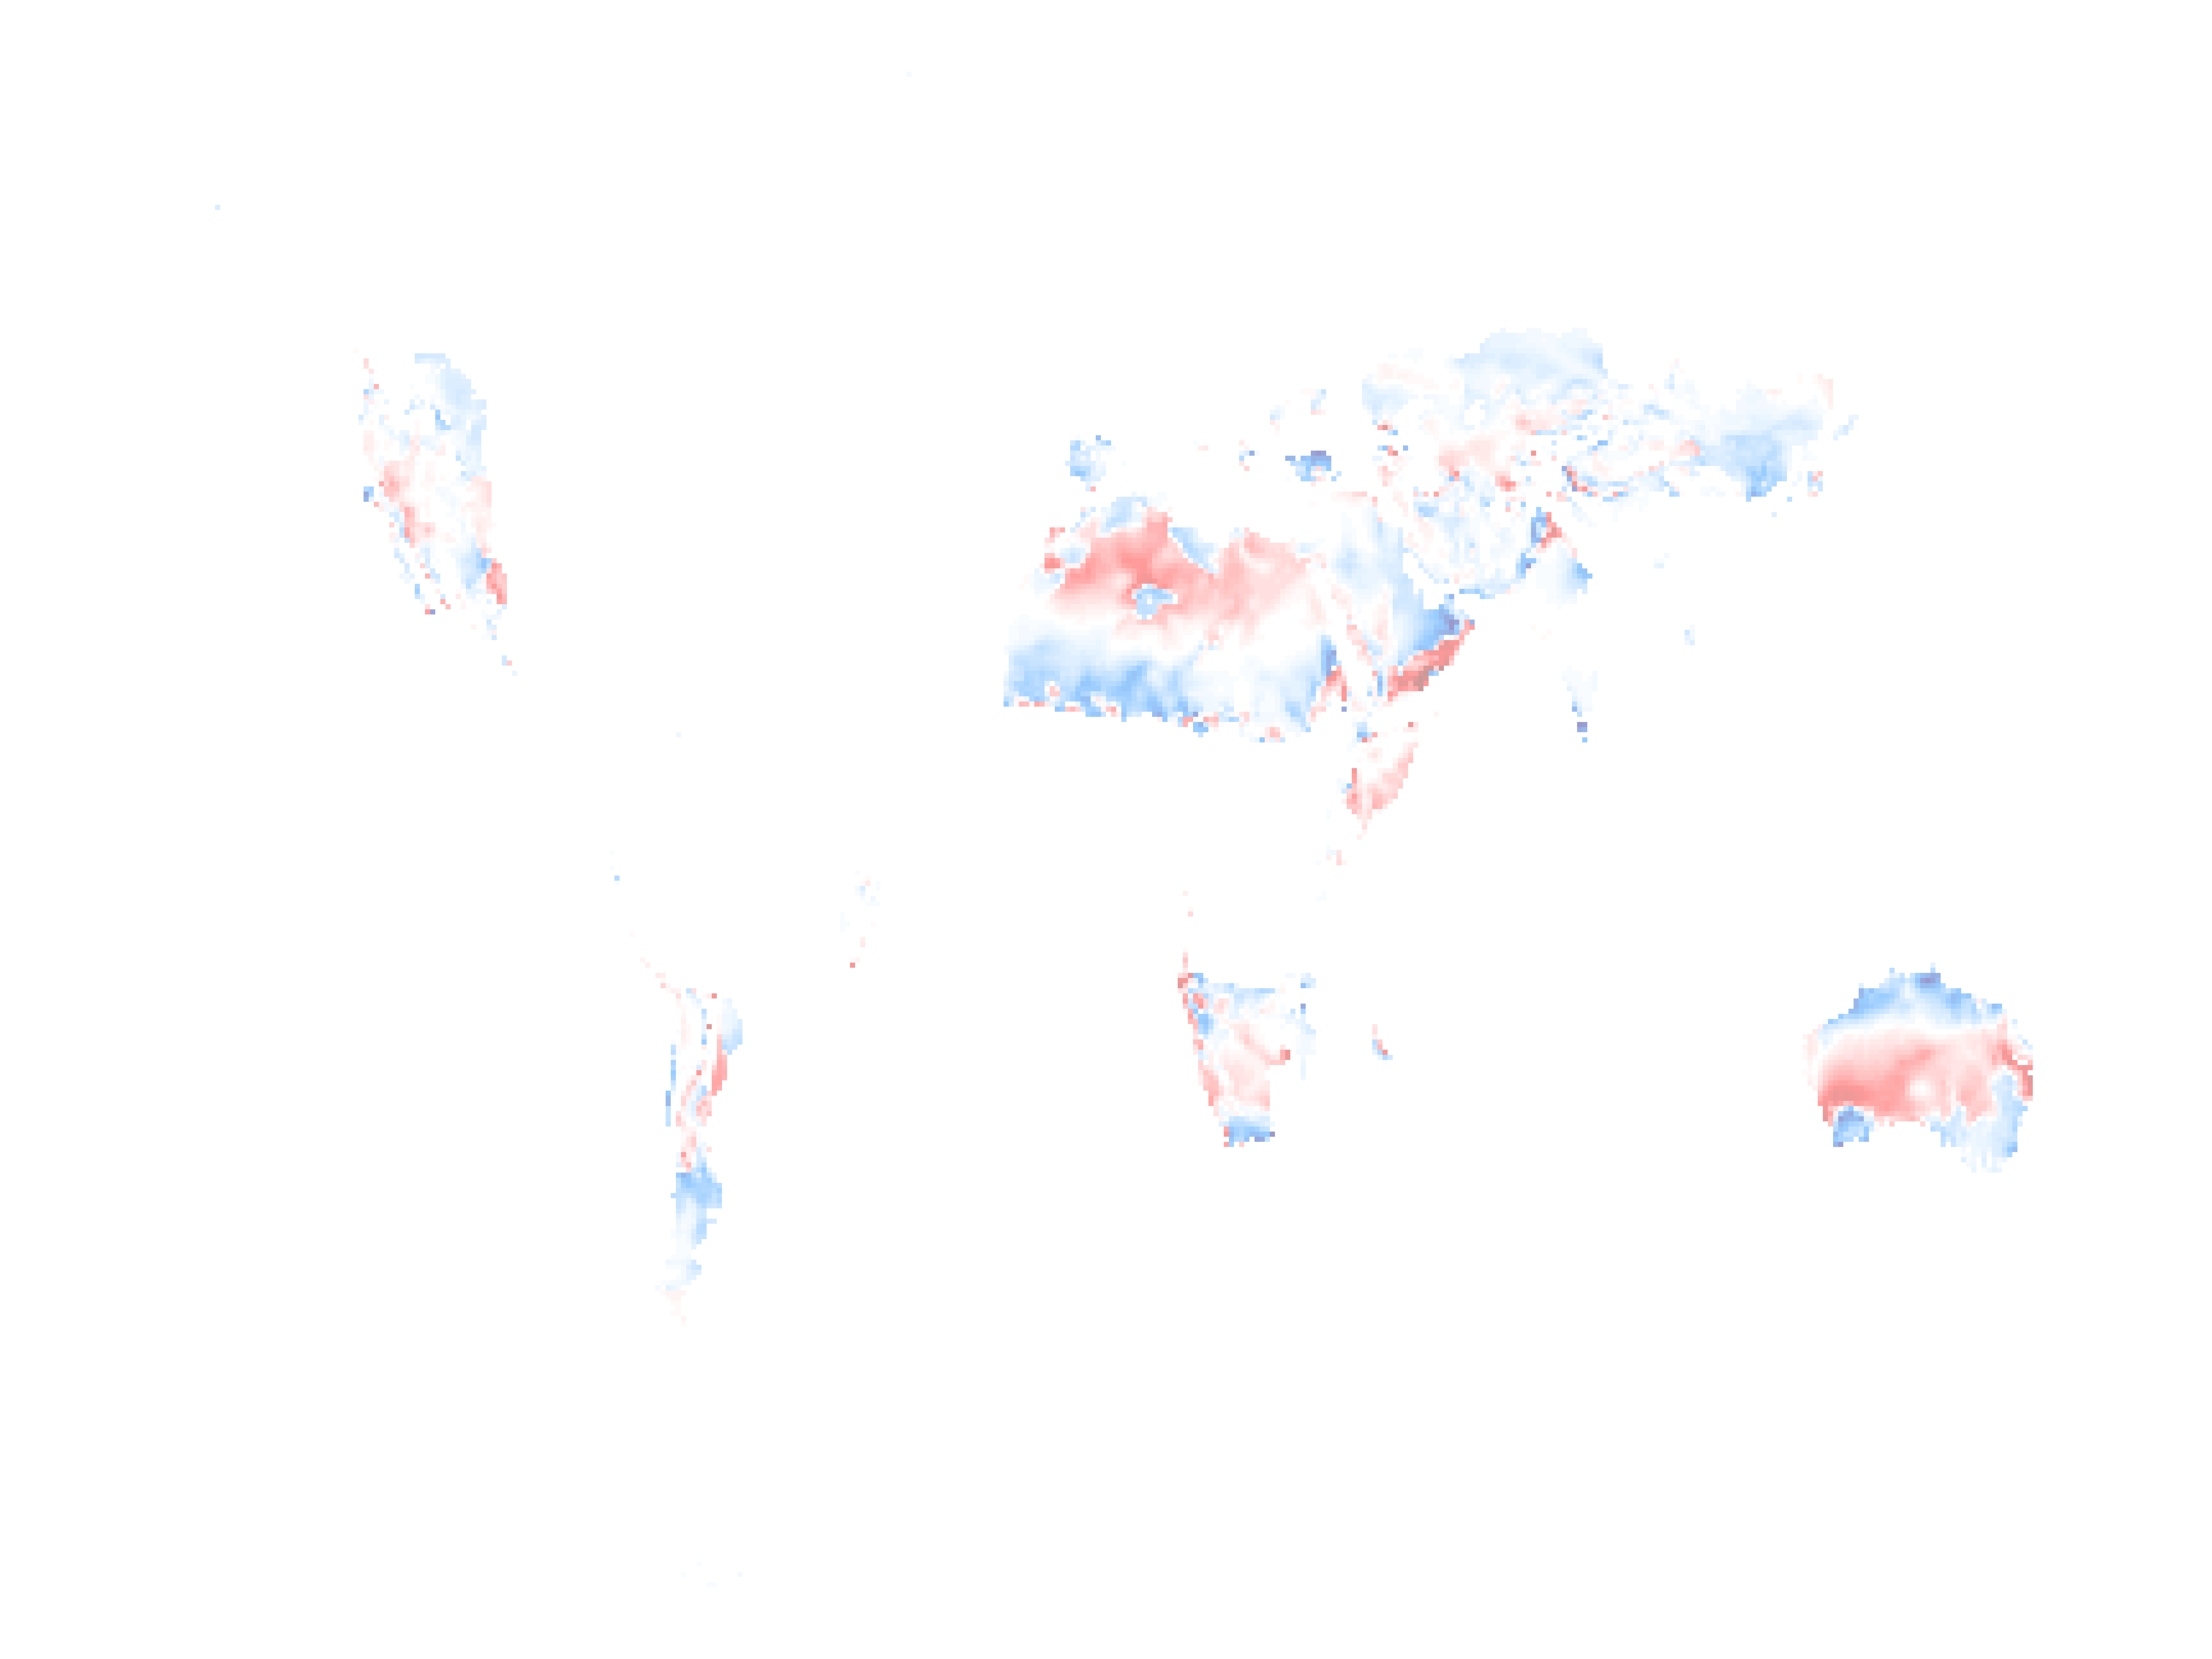

Supplement: Supplementary file 2 [file 5516baa84cd08dcf750e9d30.zip › GE_Ratiodiff.png]

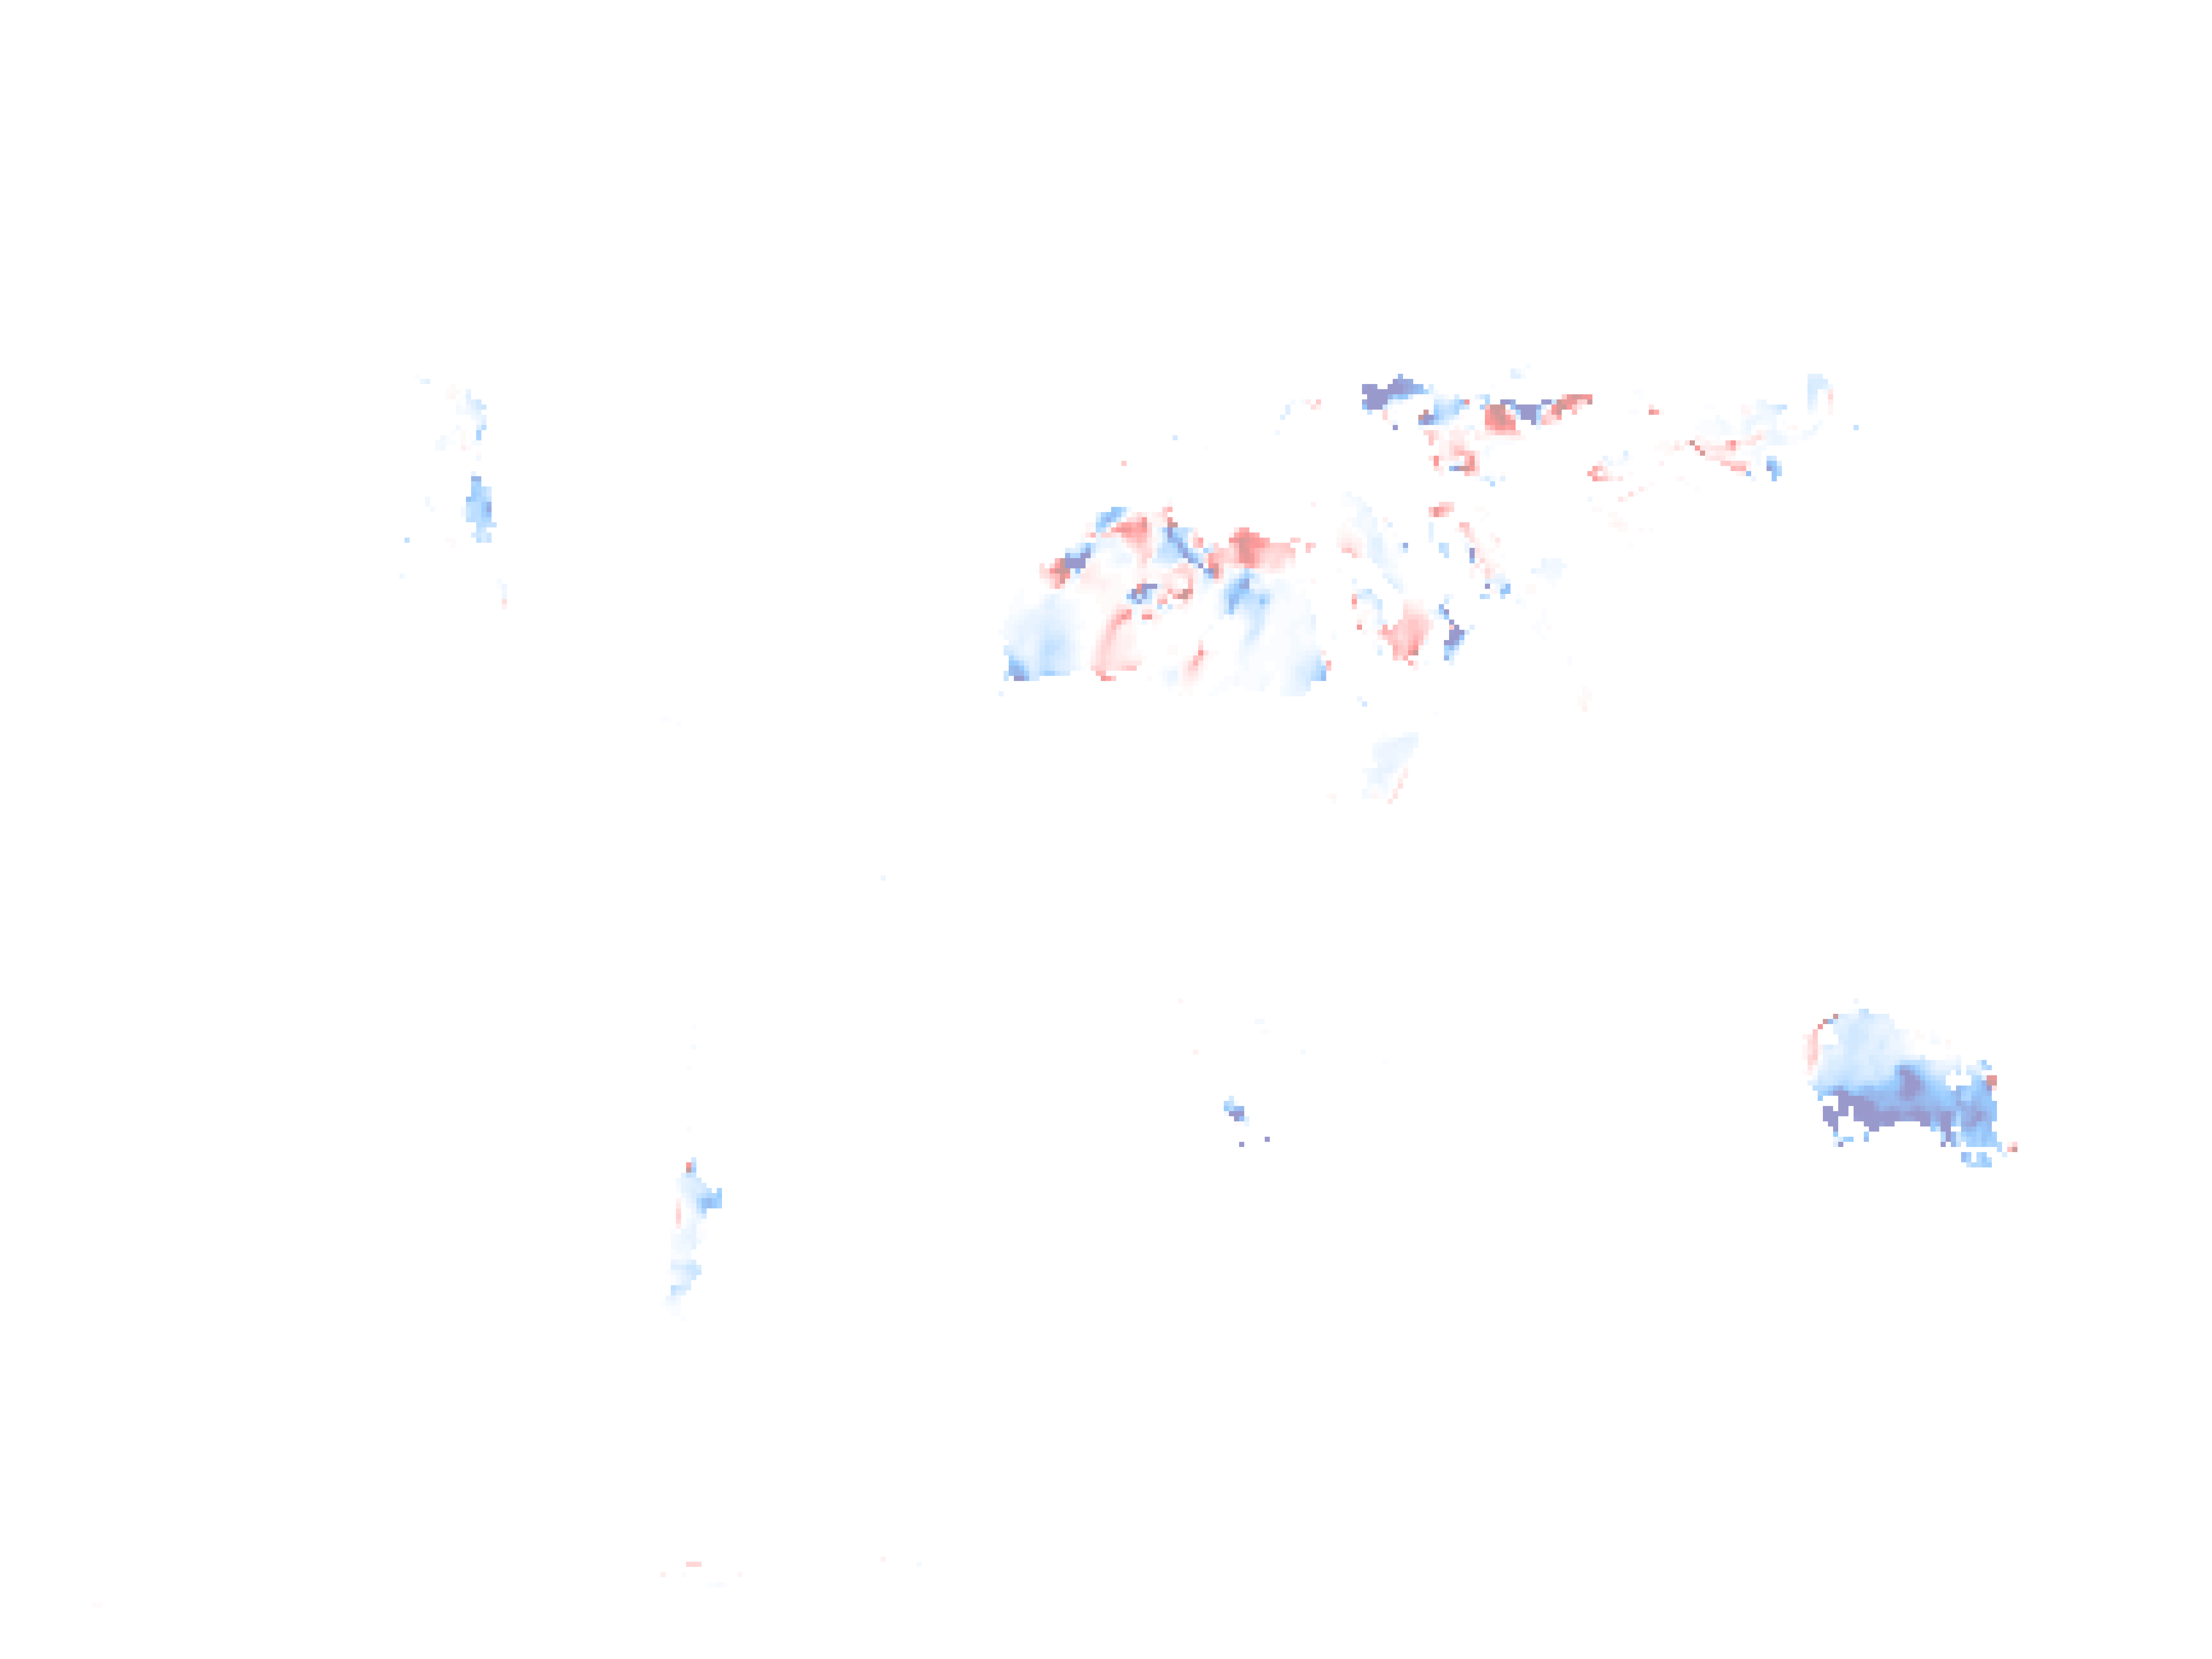

Supplement: Supplementary file 2 [file 5516baa84cd08dcf750e9d30.zip › GE_RDDirdiff.png]

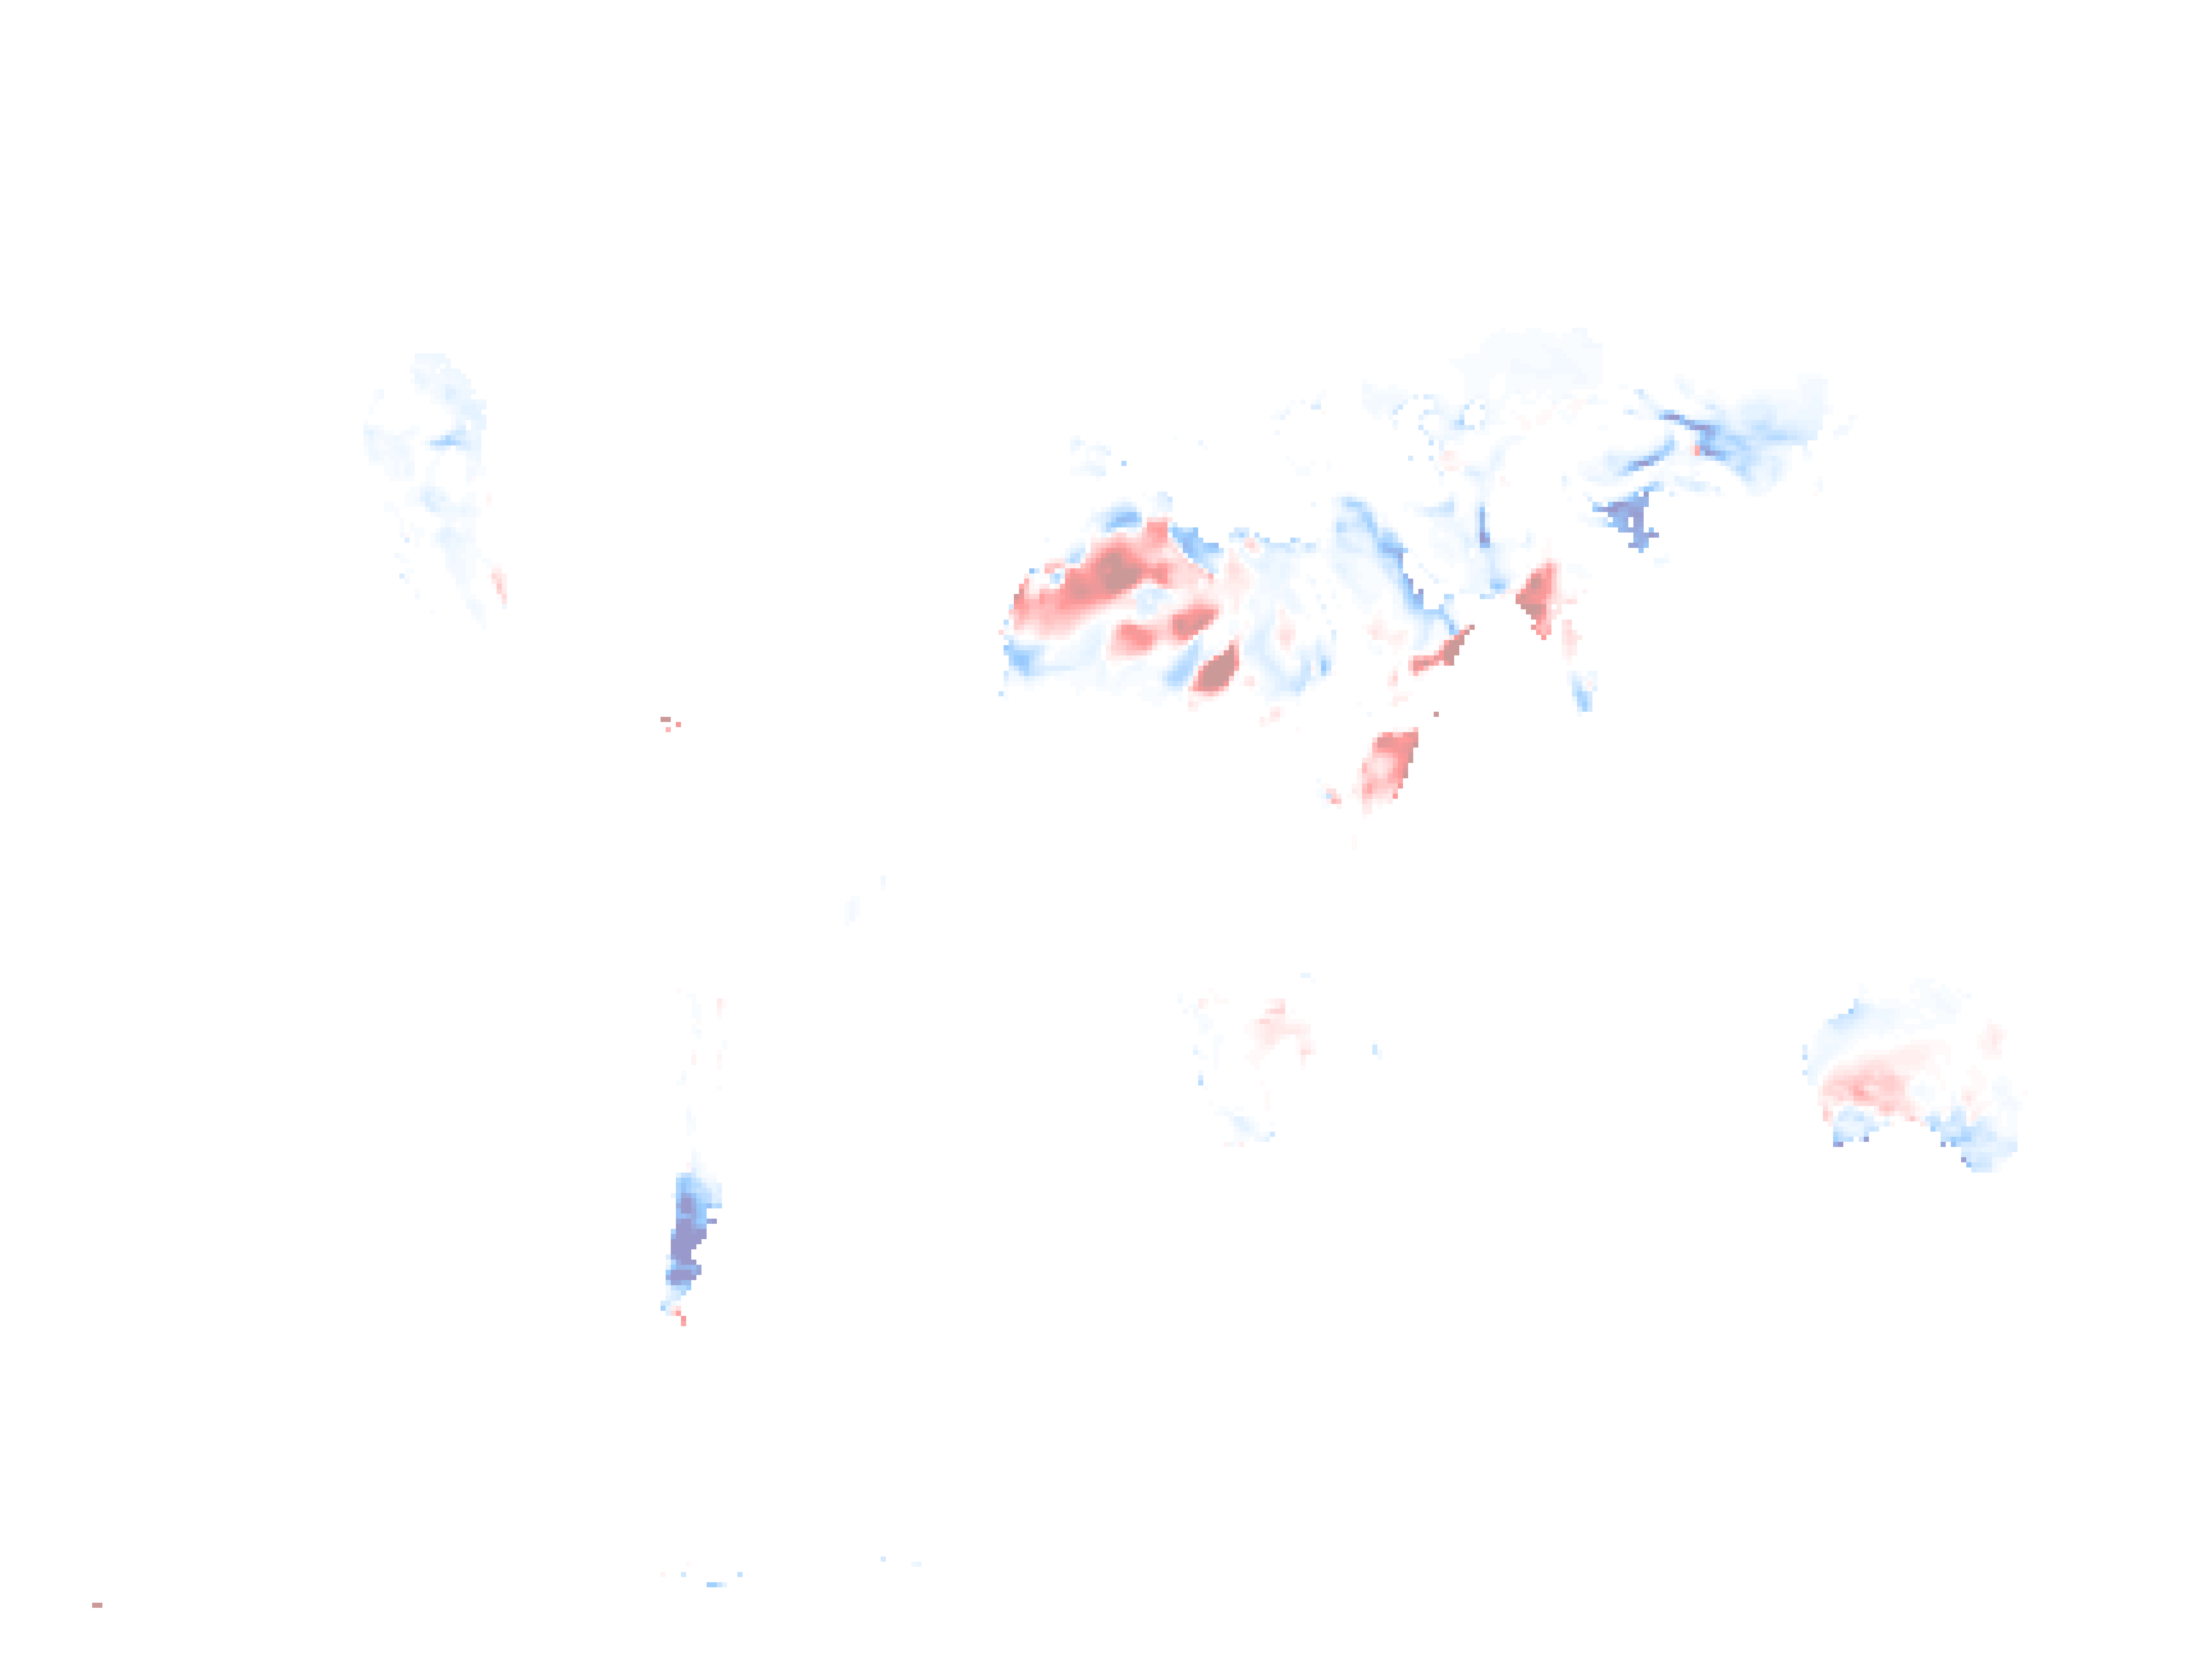

Supplement: Supplementary file 2 [file 5516baa84cd08dcf750e9d30.zip › GE_RDPdiff.png]
